# Supplementary material for: What are analog bulletin boards used for today? Analysing media uses, intermediality and technology affordances in Swedish bulletin board messages using a citizen science approach
Source: PLoS One. 2018 Aug 27;13(8):e0202077. doi: 10.1371/journal.pone.0202077 (PMC6110486; doi:10.1371/journal.pone.0202077)
Supplement: S1 Appendix — (CSV) [file pone.0202077.s001.csv]

PLACE	DUPLICATE	TRANSCRIPTION	CREATED	USER_ID	ACCESS	LOCATION	CATMSG	SENDER	TONE	LANG	CLEDIT	MEDIUM	IMAGES	MULTILING	URL	CONTACT	TECH	COLOR
Public Place	1	Hille Kyrka ORGELINVIGNING TORSDAG 8 SEPTEMBER KL 18.30 INVIGNINGSKONSERT/ORGELPAUS PER AHLMAN, DIPLOMORGANIST MINGEL MED CIDER OCH SNACKS EFTERÅT LÖRDAG 10 SEPTEMBER KL 18 MUSIK VID HELGSMÅL ELLEN WEISS SÅNG MARIANNE HEIN-NORDSTRÖM ORGEL SÖNDAG 11 SEPTEMBER KL 16 ORGELGUDSTJÄNST KYRKOKÖREN FINNDÍSS KRISTINSDÓTTIR VIOLIN, MARIANNE HEIN-NORDSTRÖM, ELLEN WEISS OCH MARIE SÖDERQUIST Varmt välkommen S…	2016-09-15 14:29:21	1871		2	14	1	2	1	Y	2	5	1	NO	4	4	2
Public Place	1	Tomas DiLeva HJÄRTAT VINNER ALLTID HILLE KYRKA, GÄVLE SÖNDAG 30 OKTOBER KL 18:00 MED HILLE KYRKOKÖR OCH UNGDOMSKÖRERNA HOPPET & KRAM UNDER LEDNING AV ELLEN WEISS BILJETTER: WWW.DILEVA.SE/BILJETTER GÄVLE TURISTCENTER ### - ## ## ##	2016-09-29 10:40:47	1871		2	20	1	2	1	Y	3	2	1	YES	1	4	2
Public Place	1	SOPPLUNCH Ons 21 sept kl 12.30 Hille Församlingsgård NN sjunger och berättar Svenska Kyrkan I HILLE	2016-09-29 10:44:20	1871		2	20	1	2	1	Y	3	2	1	NO	4	4	2
Supermarket	1	Barnprylsmarknad Lördag 24:e september kl: 10-12 i Klittens Bystuga Älvdalen Välkomna! Lekhörna och fikaförsäljning finns, glutenfria, mjölkfria och sockerfria alternativ Vid frågor och anmälan maila @@@	2016-09-17 08:53:11	1880		1	2	8	2	1	Y	2	3	1	NO	3	2	1
Supermarket	1	Skogsturer för nybörjare Köp Present-kort ! Ponnyridning på kalaset Vi kommer hem till dig Övriga aktiviteter * lär dig sköta * träna balans * annat enl ök Ring för bokning ###	2016-10-19 12:40:32	1970		1	3	2	2	1	Y	2	2	1	NO	1	1	2
Supermarket	1	Hus eller lägenhet Önskas hyra. Av liten skötsam familj. Allt av intresse. tele ###	2016-10-19 12:44:16	1970		1	5	7	2	1	Y	1	1	1	NO	1	1	1
Supermarket	1	Bräkne-Hoby Bygdegård Uthyres till föreningar för kurser och konferenser. Privata fester som bröllop, födelsedagar, barnkalas, m.m. Kostnad: Stora salen med kök 800:- Dukning dagen före 300:- Stora salen utan kök 600:- Kontakta: NN, ### NN, ###	2016-10-19 12:48:18	1970		1	5	7	2	1	Y	2	2	1	NO	1	1	2
Supermarket	1	KÄLLA BY RIVNING - ALLTjÄNST GÖR DET MESTA UTOM EL, VATTEN INNER HAR F-SEDEL TEL ###	2016-10-19 12:51:21	1970		1	3	7	1	1	Y	1	1	1	NO	1	1	1
Supermarket	1	TILL SALU TILLBEHÖR VERKTYG RESERVDELAR FÖR BÅT ALLTID BRA PRIS PÅ OLJOR Personlig service även kvällar och helger Ring, skicka sms eller mail – alla förfrågningar besvaras Mobil ### Mailadress @@@	2016-10-19 12:56:56	1970		1	2	7	2	1	Y	2	2	1	NO	3	1	2
Supermarket	1	ALLT INOM BYGG & RENOVERING SNICKERI ARBETEN FONSTERBYTEN (egen import) NN - MURNING - PUTS - KAKELSÄTTNING - MÅLNING MM. INOM BYGG MOBIL : ###	2016-10-19 12:59:41	1970		1	3	2	1	1	Y	3	3	1	NO	1	1	2
Supermarket	1	Hus.–Trädgård.–Service Svängsta Räcker tiden inte till? Värker Ryggen? vi erbjuder tjänster för hus,hem, och trädgårdsvård Tjänster VVS (vatten,avlopp,gas,värme) Trädgård (gräs,häckklipp,rabatter) Måleri (inne,ute,fönster,möbler) Städ och Flytthjälp Byggtjänster (av nytt, renovering) Har F-skatt och RUT/ROT För uppdrag,kostnadsförslag och frådor: NN: ### ### NN: ### Hemsida: www.t-t-s-svaengsta.c…	2016-10-19 13:06:41	1970		1	3	2	2	1	Y	2	3	1	YES	1	1	2
Supermarket	1	Moped, mopedobjekt köpes! Söker en moped eller ett mopedobjekt, intresserad av alla lite äldre mopeder, t ex: PUCH, Crescent, Zündapp, Monark, Husqvarna, Mustang, Yamaha FS1, Yamaha DT, Honda MT, Chappy, Flakmoped m fl. Så tveka inte att höra av dig, om du har någon moped ståendes, oavsett skick! Ring eller sms:a Med vänlig hälsning NN	2016-10-19 13:09:04	1970		1	2	7	2	1	Y	2	1	1	NO	1	1	1
Supermarket	1	Håll ett Perfect Home party Perfect Home är Nordens största homepartyföretag inom heminredning och presentartiklar. Våra produkter är alltid populära och vi erbjuder en kollektion som faller de flesta i smaken. Bjud in vänner, familj och kollegor till en intressant och trevlig Perfect Home demonstration. Förutom nya erbjudanden varje månad har du som värdinna fina fördelar. -Du kan få en GRATIS t…	2016-10-19 13:11:00	1970		1	2	2	2	1	Y	2	2	1	YES	1	1	2
Supermarket	1	Skonsam träning? AB Cirle Pro (batteridriven dator ingår) Känd från TV-shop. och Gåstavar med gasfjädring (Energy Bumbypump) (x-tra-gummi och snöringar medföljer) Allt mycket välskött och mycket litet använt. Pris: 1000 kr för båda, eller 600kr/träningsredskap Säljes av NN, ###	2016-10-19 13:13:45	1970		1	2	7	2	1	Y	2	1	1	NO	1	1	1
Supermarket	1	Turridning på islandshästar i natursköna områden. Genom skogar, över ängar, längst med havet. 2 timmars tur med fika 480 kr 4 timmars tur med lunch 950 kr Vi gör även specialarrangemang Välkommen! Väbylunds Islandshästar 372 63 Bräkne-Hoby www.vabylund.se ###	2016-10-19 13:15:23	1970		1	3	2	2	1	N	2	2	1	YES	6	1	1
Supermarket	1	HÖSTRENGÖRING I TRÄDGÅRDAR UTFÖRS Tel. ###	2016-09-18 18:12:17	1874		1	3	7	1	1	Y	2	1	1	NO	1	2	1
School	1	EN DEMOKRATIDAG På Riktigt! ATT TILLSAMMANS GÖRA SKILLNAD 9.30-14.00 ONS 5 OKTOBER FJÄLLRÄVEN CENTER På Riktigt! är ett möte mellan ungdomar, politiker och tjänstepersoner. I din kommun. Sista anmälningsdag är den tjugotredje september. orskoldsvik.se/ungasinflytande ungivok Örnsköldsviks kommun – Ung ÖRNSKÖLDSVIKS KOMMUN	2016-09-19 06:42:51	1855	2	1	12	4	1	1	Y	3	3	1	YES	6	1	2
School	1	KARATE FÖR VUXNA Styrka - Smidighet - Självförsvar NYBÖRJARSTART Prova på gratis september ut! Vi kör igång träningen för vuxna 13 år och uppåt 2 gånger per vecka med start måndag 5/9 i Parkskolans gymnastiksal tid: kl. 19.00 Utnyttja möjligheten att träna hela familjen, Örnsköldsvik Shotokan Karateklubb ger familjerabatt!! För information NN ### NN ###	2016-09-19 06:54:39	1855	1	1	18	1	1	1	Y	2	2	1	NO	1	4	2
School	2	VI MÖTS PÅ MITTEN MUSIK KOMIK TEATER Av och med Stina Joza och Jens Nilsson FOLKAN ÖRNSKÖLDSVIK 9–10 SEPTEMBER Tid 19:00. Pris: 225 kr. Förköp: Turistbyrån, Ticnet.se, Folkan Örnsköldsvik.	2016-09-19 06:56:09	1855	1	2	20	2	2	1	Y	3	2	1	YES	6	1	2
School	1	HIGH COAST DIVING - Vi utbildar dig inom dykning BOKA din plats på www.highcoastdiving.com Evenemang PADI Open Water Diver (Grundkurs i dykning) Datum Start 5 Sept Pris 4795kr www.highcoastdiving.com Telefon: ### ### Adress: Parkgatan 7 89134 Örnsköldsvik @@@ www.highcoastdiving.com	2016-09-19 06:57:07	1855		1	3	2	2	1	Y	3	2	1	YES	6	1	2
School	1	WILL YOU BE THE LAST MAN STANDING NOLASKOLANS ELEVRÅD	2016-09-19 06:42:45	1855	2	1	24	1	2	3	Y	3	1	2	NO	5	1	2
School	1	VI MÖTS PÅ MITTEN MUSIK KOMIK TEATER Av och med Stina Joza och Jens Nilsson FOLKAN ÖRNSKÖLDSVIK 9–10 SEPTEMBER Tid 19:00. Pris: 225 kr. Förköp: Turistbyrån, Ticnet.se, Folkan Örnsköldsvik.	2016-09-28 09:05:01	1876	2	2	20	2	2	1	Y	3	2	1	YES	6	3	2
School	1	Förbud mot nötter, jordnötter, mandel och sesam Många barn och ungdomar är allergiska mot nötter, jordnötter, mandel eller sesam. En person som är svårt allergisk kan får en livshotande allergichock om hon av misstag får i sig detta. För att alla ska kunna känna sig trygga har vi därför infört ett fullständigt förbud mot nötter, jordnötter, mandel och sesam på skolans område. Förbudet gäller vid …	2016-09-19 06:44:40	1855	2	1	24	4	1	1	Y	2	2	1	NO	5	1	2
School	1	START Res dig. Sträck på dig. Rör på dig. Om två månader är du piggare, gladare och friskare. motion – det är du värd TÄVLA OCH VINN EN SPAHELG ELLER ETT GYMKORT! Så här gör du för att vara med i tävlingen: • Bestäm dig för att börja motionera. • Anmäl dig till någon eller alla tre tävlingsperioderna. • Anmäl dig senast dagen innan perioderna börjar. TÄVLINGSPERIODER • 1 oktober-30 november 2016 …	2016-09-19 06:53:28	1855	2	1	18	2	2	1	Y	3	3	1	YES	2	1	2
School	1	TRYCK Tryckfriheten 250 Utställning om tryckfriheten som i år fyller 250 år 12 september - 30 september FH Gnistans kafe arr. ABF Västernorrland & Folket i bild kulturfront	2016-09-19 06:57:15	1855	2	1	20	1	1	1	Y	3	3	1	NO	5	3	2
School	2	Anmäl till NN senast 22/9 EN DEMOKRATIDAG På Riktigt! ATT TILLSAMMANS GÖRA SKILLNAD. 9.30-14.00 OST 5 OKTOBER FJÄLLRÄVEN CENTER På Riktigt! är ett möte mellan ungdomar, politiker och tjänstepersoner. I din kommun. Sista anmälningsdag är den tjugotredje september. ornskoldsvik.se/ungasinflytande ungivok Örnsköldsviks kommun – Ung ÖRNSKÖLDSVIKS KOMMUN	2016-09-19 07:05:19	1855		1	12	4	1	1	Y	3	1	1	YES	2	1	2
School	2	KARATE FÖR VUXNA Styrka - Smidighet - Självförsvar NYBÖRJARSTART Prova på gratis september ut! Vi kör igång nybörjarträningen för vuxna 13 år och uppåt 2 gånger per vecka med start måndag 5/9 i Parkskolans gymnastiksal tid: kl. 19.00 Uttnytja möjligheten att träna hela familjen, Örnsköldsvik Shotokan Karateklubb ger familjerabatt!! För information NN ### NN ###	2016-09-19 07:16:42	1855		1	18	1	2	1	Y	2	2	1	NO	1	1	2
School	2	WILL YOU BE THE LAST MAN STANDING NOLASKOLANS ELEVRÅD	2016-09-22 11:17:59	1855	2	1	24	1	2	3	Y	3	1	2	NO	5	1	2
School	2	START Res dig. Sträck på dig. Rör på dig. Om två månader är du piggare, gladare och friskare. Motion- det är du värd TÄVLA OCH VINN EN SPAHELG ELLER ETT GYMKORT! Så här gör du för att vara med i tävlingen: * Bestäm dig för att börja motionera. * Anmäl dig till någon eller alla tre tävlingsperioderna. * Anmäl dig senast dagen innan perioderna börjar. TÄVLINGSPERIODER * 1 oktober-30 november 2016 *…	2016-09-22 11:23:54	1855		1	18	2	2	1	Y	3	3	1	YES	2	1	2
School	1	I AM CONFIDENT. I AM INDEPENDENT. I AM A CITIZEN OF THE WORLD. I AM AN AU PAIR Cultural Care Au Pair CULTURALCARE.SE ###	2016-09-19 11:08:10	1897		1	24	2	2	3	Y	3	1	1	YES	6	1	2
School	1	VOLONTÄR i Nepal, Ecuador, Indien och Tanzania Res ut i världen, engagera dig och kom hem med ett större hjärta! www.skandinaviskainstitutet.se	2016-09-19 11:09:33	1897		1	20	1	2	1	Y	3	2	1	YES	2	1	2
School	1	IF YOU HAVE A PROBLEM WITH ME, GIVE ME A CALL. IF YOU DON'T HAVE MY NUMBER THEN THAT MEANS YOU DON'T KNOW ME WELL ENOUG TO HAVE A PROBLEM..! www.Daveswordsofwisdom.com	2016-09-19 11:12:25	1897		1	24	8	2	3	Y	2	3	1	YES	2	1	2
School	1	Winter…. Not My Season.	2016-09-19 11:13:28	1897		1	24	7	2	3	Y	2	2	1	NO	5	1	2
School	1	Never ever give up!	2016-09-19 11:15:00	1897		1	24	7	2	3	Y	2	3	1	NO	5	1	2
School	1	SELF CONTROL the only way to survive in this world dominated by idiots	2016-09-19 11:16:55	1897		1	24	7	2	3	Y	2	2	1	NO	5	1	2
School	1	"Att gnälla är som att gunga gungstol. Man har nåt att göra, men kommer ingenstans."	2016-09-19 11:17:48	1897		1	24	7	2	1	Y	2	1	1	NO	5	1	2
School	1	Välkommen till Falu kommuns nya trådlösa gästnät Från och med fredag 25 september öppnar IT- kontoret det nya gästnätet. Det innebär att "Karma-konton" samt biljetter erätts med en modernare teknik. Vi vänder oss till alla gäster, anställda, elever och partners som befinner sig i Bibliotek, Slättanläggningarna, Lugnetanläggningarna samt alla skolor. FKGUEST visas som ett alternativ nätverk i de m…	2016-09-19 11:41:04	1897		1	24	4	1	1	Y	2	1	1	NO	5	1	2
School	1	Sveriges lantbruksuniversitet Swedish University of Agricultural Sciences Science and Education for Sustainable Life Vill du lösa dagens och morgondagens miljöproblem och bidra till att fler kan äta sig mätta? Då är #pluggahållbart något för dig! Följ studenternas vardag: www.facebook.com/pluggahallbart www.instagram.com/pluggahallbart www.slu.se/pluggahallbart/ Våra utbildningar ger jobb: Agrono…	2016-09-19 11:13:49	1897		1	3	3	1	1	Y
School	1	STUDERA I ENGLAND ✔ Topprankade universitet och brett programutbud ✔ Flexibelt antagningssystem (inte bara snittbetyg) ✔ Unika utbildningar, ofta med fokus på att "få jobb" ✔ Praktik är ofta en del av utbildningen ✔ Ökade språkkunskaper, bra erfarenhet, lärorikt ✔ Spetsa ditt CV, få högre lön! ✔ Billigare än andra engelsktalande länder Hjälp med UCAS ansökan och gratis studierådgivning Boka studi…	2016-09-19 11:14:48	1897	1	1	6	2	2	1	N	3	5	1	YES	6	1	2
Supermarket	1	Har någon sett mig? Vänligen ring min ägare: NN ### Sköldpaddsfärgad, kastrerad, honkatt på 6 månader. Taturing i vänster öra, chippad! Bor på Smedstorpsgård! Borta sedan Torsdag 10/3 TACK!	2016-09-19 11:19:00	1869		2	9	7	1	1	Y	2	2	1	NO	1	2	2
Supermarket	1	STOCKHOLM NORD KARATEKLUBB Okinawa Goju Ryu TRADITIONELL KARATE & KOBUDO VÄLKOMMEN TILL VÅR NYBÖRJARINTAGNING För mer information om tider och datum, besök www.stockholmnordkk.se	2016-09-19 11:20:00	1869		2	18	1	2	1	Y	3	2	1	YES	6	3	2
School	1	Falu Kommun SCHEMA Läsåret 2016-17 Falu kommun Klass: VO16 Utskriftsdatum: 2016-08-22 Ansvarig lärare: NN, NN Måndag Tisdag Onsdag Torsdag Fredag Matte 3b MAGRUND klassråd Ej,v46-50 TSE02 ELI15 Matte 3b MAGRUND klassråd Ej:v46-50 HISHIS01a1 Ej:v46-50 AOR03 213 HALHAL0 Ej.v46-50 TSE02 213 SVASVA01 Ej v46-50 MEN12 114 SVESVE01 Ej v46-50 ALA06 HISHIS01a1 Ej:v35, 37, 39, 41, 43, 46-50 AOR03 213 ENGEN…	2016-09-19 11:27:38	1897	2	1	24	3	1	1	Y	2	1	1	NO	6	1	1
School	1	Falu Kommun SCHEMA Läsåret 2016-17 Falu kommun Klass: VO15 Utskriftsdatum: 2016-08-22 Ansvarig lärare: NN, NN Måndag Tisdag Onsdag Torsdag Fredag	2016-09-19 11:28:36	1897	2	1	24	3	1	1	Y	2	1	1	NO	6	1	1
School	1	Falu Kommun SCHEMA Läsåret 2016-17 Falu kommun Klass: VO14 Utskriftsdatum: 2016-08-22 Ansvarig lärare: NN, NN Måndag Tisdag Onsdag Torsdag fredag	2016-09-19 11:29:14	1897	2	1	24	3	1	1	Y	2	1	1	NO	6	1	1
School	1	På Kristinegymnasiet … visar vi hänsyn … stödjer och hjälper vi varandra … lyssnar vi på varandra … kommer vi i tid … tar vi med oss rätt arbetsmaterial … håller vi skolan ren … är vi rädda om material och utrustning … har vi en rökfri miljö inom skolans område ... använder vi mobiler och datorer med syfte att främja undervisningen Enligt beslut på Skolrådet 2014-03-12	2016-09-19 11:30:25	1897	2	1	24	3	1	1	Y	2	3	1	NO	6	1	1
School	1	UTTAGNING AV NY STYRELSE! GÅR DU I ÅRSKURS 2? SÖK TILL DALA GYMNASISTFÖRENING OCH ARRANGERA FALUNS STUDENT! LÄROVERKSPARKEN 12/9 & 14/9 KL. 17:00 VI BJUDER PÅ FIKA! VÄLKOMMEN! Du behöver bara komma på en utav dagarna!	2016-09-19 11:30:38	1897	2	1	24	3	2	1	Y	2	3	1	NO	4	1	1
School	1	KRISGRUPPEN I KRISTINEGYMNASIET NN Skolsköterska NN Kurator NN Specialpedagog NN Biträdande rektor NN Vårdlärare NN Skolassistent NN Datatekniker NN Köket	2016-09-19 11:31:15	1897	2	1	24	3	1	1	Y	2	2	1	NO	5	1	2
School	1	Likabehandlingsgruppen/Antimobbingteam NN NN NN NN NN NN NN NN Antibobbingsteamets samordnare NN NN	2016-09-19 11:31:52	1897	2	1	24	3	1	1	Y	2	2	1	NO	5	1	2
School	1	22 sep. ÖPPET HUS på Sophiahemmet Högskola om sjuksköterskeprogrammet Sida 1 av 2 Stockholm Om ditt nyhetsbrev ser konstigt ut i din e-postklient, klicka här. SOPHIAHEMMET HÖGSKOLA Hemsida | Skicka vidare | Prenumerera | Avprenumerera "Sjuksköterskeprogrammet på Sophiahemmet Högskola är mer än bara en utbildning" Jonas, student SJUKSKÖTERSKEPROGRAMMET 180 hp Vålkommen till ÖPPET HUS på Sophiahemm…	2016-09-19 11:32:51	1897	2	1	24	8	1	1	Y	2	5	1	NO	3	1	1
Public Place	1	Tobbe Petersson spelar på Edsviks Musikfestival 27 aug. kl 18.00, fri entré	2016-09-19 11:47:38	1869		2	3	2	2	1	Y	3	2	1	NO	4	1	2
	1	BLUESKVÄLL MED JOHNNY & FRIENDS Gamla Pumphuset 30/9 Förköp: Pumphuset	2016-09-19 13:39:27	1856			3	2	2	1	Y	4	2	1	NO	4	1	2
	1	UNDER KULTURKOLLISIONEN LÖRDAGEN 17/9 HAR GALLERI KRÅKAN EXTRA ÖPPET: 18.00 - 21.00. VÄLKOMNA!!	2016-09-19 13:49:29	1856			3	1	2	1	Y	2	2	1	NO	4	1	2
	1	SÄLJES! 18/9-16 Helt komplett LUX Royal-Dammsugare! + Filter +påsar 12:000! Prutat å KlaRt! Använd bara 3 månader! Helt felfri! ### ###	2016-09-20 10:28:20	1856			2	7	2	1	Y	1	1	1	NO	1	1	1
	2	BLUESKVÄLL MED JOHNNY & FRIENDS FREDAG 30/9 - PUMPHUSET BILJETTER: FÖRKÖP PUMPHUSET 100 kr DÖRRARNA ÖPPNAR KL : 20.00 Kvällens ERBJUDANDE:KYCKLINGSPETT/ÖL 100 KR. OBS! BEGRÄNSAT ANTAL	2016-09-20 11:12:59	1856			3	2	2	1	Y	4	2	1	NO	4	1	2
	1	Till Salu! Damcykel Cresent, blå rund ram 3 vxl. Fot o hand broms 400 :– ###	2016-09-20 11:14:24	1856			2	7	2	1	Y	1	1	1	NO	1	1
	1	SKORSTENSSKYDD Öppningsbara huvar i stabil hållbar konstruktion med fågelnät i gavlarna Huvarna finns i svart ,tegelröd Samt mörkröd kulör Pris med rot från 2400kr ink moms priset innefattar mätning ,tillverkning samt montering snabb leverans ! Utför även övrig byggplåt som exempelvis ;falsade plåttak ,skorstensbeslag Fönsterbleck vindskivor mm och stora och små ventilations anläggningar ex vis V…	2016-09-20 12:02:50	1856			2	7	2	1	Y	2	2	1	NO	1	1
	1	lnnebandybutiken ger 20% rabatt till alla kunder KIB BJUDER IN BYTESMARKNAD Kläder & Utrustning På Innebandybutiken 18 september - 2016 InIämning: kl. 09.30-11.00 Försäijning: kl. 12.00-14.00 Undermåliga saker tas ej emot Välkommen att fynda!	2016-09-20 12:13:32	1856			2	2	2	1	Y	2	5	1	NO	4	1
	1	ABF Hösten 2016 Datakurs för nybörjare! Lär dig Datakunskaper i lugn och ro under Iedning av kunnig ledare Ledare NN; Datalärare Dag: Onsdag Tid: 10:00 – 12:00 eller 16:00 – 18:00 Start: 5 oktober Antal ggr: 6 gg á 3 studietimmar Kostnad: 800 kr ordinarie pris Medlemspris 600 kr (om du medlem i ABF:s organisationer) Kursinnehåll: Internet, skriva enkla dokument, söka information, e-legitimation, …	2016-09-20 12:19:49	1856			3	1	1	1	Y	2	3	1	NO	1	1
	1	Nu fyller vi Nobelhallen. BIK Karlskoga 1978 BIK Karlskoga vs IK Oskarshamn Torsdag 22/9 19.00 Nobelhallen Ståplats: Förköp: Vuxen 130:- Pensionär 90:- Barn & ungdom 0:- Arenan: Vuxen 150:- Pensionär 110:- Barn & ungdom 0:- Sittplats Förköp: Vuxen 190:- Pensionär 150:- Barn & ungdom 60:- Arenan: Vuxen 210:- Pensionär 170:- Barn & ungdom 80:- Köp din biljett på : www.bikkarlskoga.se	2016-09-20 12:33:00	1856			18	1	2	1	Y	3	3	1	YES	4	1
	1	SKIN FOTTÖLJ KLÄDER. HERR SÄNG TV. BÄNK. + BÄNK PORSLIN 1500:– KÖKSBORD+1 stol ### ###	2016-09-21 09:57:42	1856			2	7	1	1	Y	1	1	1	NO	1	1	1
	1	GALLERI KRÅKAN Hotellgatan 8, Karlskoga NN VISAR AKVARELLER 6/9-18/9 2016 VERNISSAGE TISDAG 6/9 16.00-19.00 ÖPPET: TISDAG-SÖNDAG 12.00-16.00	2016-09-21 10:49:08	1856			20	7	2	1	Y	2	2	1	NO	4	1
	1	Diverse till salu Karlskoga Tallrik Lövfat 2 st plåtboxar med 8 DVD filmer som spänner över Elvis Presleys hela liv: På Engelska och Tyska Kam och Karda 3 Låscylindrar med 5 nycklar Kundkoppel rött 2 Plädar 10 glas mönstrade med guldkant 4 glas med handtag För mer information och bilder på det som är till salu Ring eller maila till @@@ Mobil ###	2016-09-21 11:04:53	1856			2	7	1	1	Y	2	1	1	NO	6
	1	Har du planer på att åka på landskamp? Vill du det ska synas att du stöttar Svenska landslag? Med "SverigeMössan" lovar vi att du kommer att väcka uppmärksamhet och det finns ingen tvivel om vem du hejar på! Gå in på www.sverigemossan.se för kontakt och prisinformation. NN och NN	2016-09-21 11:11:07	1856			2	7	2	1	Y	2	2	1	YES	2	1
	1	Grilltur Vi startat med turridning Deen håller på i ca 3 timmar 25 Sep – Grillningen börjar kl 15.00 Turen startar kl 11.00 Mycket ridning o god mat . Ta med ombyte ifall det regnar eller mysisar till grillningen. Hemma hos NN Södra Öfalla 145 69192 Granbergsdal på telefon ###	2016-09-21 11:12:59	1856			18	7	2	1	Y	2	1	1	NO	1		1
	1	TILL SALU 2 s.t plåtboxar med 8 DVD filmer som spänner över Elvis Presleys hela liv: På Engelska och Tyska 10 glas mönstrade med guldkant ### @@@	2016-09-21 11:14:22	1856			2	7	1	1	Y	2	2	1	NO	6	1
	1	VI ÄR HÄR FÖR ATT HJÄLPA DIG! Behöver ni hjälp att kasta ert gods till återvinningscentralen? Inga problem! Vi hjälper dig gärna. Vi kastar allt ris åt dig för endast 200kr/last. Övriga gods 250-350kr/last. Ring för mer information och tidsbokning: Tel: ### Återvinningscentralen	2016-09-21 11:18:26	1856			3	2	1	1	Y	2	1	1	NO	1	1
	1	Säljes Expansions.kärl. Ford. 500:– tel ### tryck-provat.	2016-09-21 11:55:46	1856			2	7	1	1	Y	2	2	1	NO	1	1	2
	1	Sparbanksbörsen Fjugesta Spanska flugan 15 okt - 12 nov 375 kr inkl. mat och kaffe Boka på www.lekebergsrevyn.se Vi har textade och syntolkade föreställningar. Se webben för info. Lekebergs revysällskap ### Studiefrämjandet Lekebergs Sparbank	2016-09-21 12:31:35	1856			20	1	2	1	Y	3	5	1	YES	6	1	2
	1	YINYOGA 60+ PÅ DAGTID! Start tisdag 20 september Kl. 10.00-11.30 Kurs 6 ggr 720kr Föranmälan, max 10 personer. Enstaka tillfälle, i mån av plats, 130,-/gång OBS! Föranmälan krävs. Lärare: NN YINYOGA 60+ Kursen är för dig som är runt 60 år eller äldre. En långsam, enkel, avkopplande men samtidigt energigivande yogastil som alla kan utföra utifrån sina egna förutsättningar. Ingen tidigare erfarenhe…	2016-09-21 18:46:54	1856			3	2	1	1	Y	2	2	1	NO	6	1	2
	1	Att skänka utrustning! Har du utrustning som du inte använder? Exempelvis: fotbollsskor, bollar, skidor, racketar, skridskor, klubbor, inlines, pulkor, pjäxor mm. Vi tar tillvara och lånar ut gratis för en aktiv fritid! Insamlingsadress Svenska kyrkan Kungsvägen 39 vardagar 10-16 lördagar 10-13 Att låna utrustning! Alla får låna - Allt är gratis - Fokus på miljön All utrustning utlånas kostnadsfr…	2016-09-21 18:56:25	1856			24	1	2	1	Y	2	2	1	NO	4	1	2
	1	KROPP & SJÄL 2 OKT, Kl. 10.00-16.00 Boda Borgs Konferenslokaler KARLSKOGA STORSEANS, Magnetmassage, Mary kay produkter, Andlig healing, Orakelstenar, Mediala konsultationer, Shiatsubehandlingar, Energibalansering, Handgjorda smycken (gjutarboden), Massage och hälsa, Djurkommunikation, Hälsoprodukter (forever living), Zonterapi, Balanstest, Intiativ vägledning, Tarrot, Hårvårdsprodukter, ÖNSKECERM…	2016-09-22 12:54:43	1856			3	1	1	1	Y	2	1	1	NO	4		1
	1	Synnes Själutveckling Spiritualistiskt medium & healer NN Karlskoga e-post: @@@ tele: ### - Cirklar - Mediala konsultationer - Healingbehandlingar - Gruppseanser - Husrensning - Kurser - Tarot - Själar säger aldrig farväl - Hemsida: www.synne.se Facebook: Medium NN	2016-09-22 13:02:06	1856			3	7	1	1	Y	2	3	1	YES	6	1	1
	1	BAKLUCKE LOPPIS!! I samband med Höstmarken den 1 Oktober har vi Bakluckeloppis i centrum. Är du intresserad? Ring NN på telefon: ### för mer info. KB Karlskoga	2016-09-22 13:05:16	1856			2	7	2	1	Y	2	1	1	NO	1	1	1
	1	40 MINUTER MED HUMOR, AKROBATIK och IMPROVISATION Teater Imba presenterar Vår version av SKÖNHETEN OCH ODJURET Degerfors SÖNDAG DEN 25 SEPT. Kl. 15:00 FOLKETS HUS, TEATERSALONGEN Biljetter säljes på biblioteket. Pris 50:-. Tel.: ### Från 6 till 106 år!	2016-09-22 13:10:11	1856			3	2	2	1	Y	3	2	1	NO	4	1	2
	1	Fox Kurs för Nybörjare Också för Tjejer som vill lära sig föra Start 31 Aug Onsdagar 18:00-19:00 Vecko kurs Med NN och NN BUGG KURS 17-18sept Med NN och NN Helg kurs Motionsdans för alla Onsdagar Motions Bugg/Fox i hallen på övervåningen traditionell Klassisk dansmusik Kl: 19.00-21.30 Kostar 40:- Motionsdansen bara Fox .Modern och klassisk fox musik blandat kl 19:00-21:30 Stora hallen nere Kostar…	2016-09-22 13:18:24	1856			3	2	2	1	Y	2	3	1	YES	6	1	2
	1	KÖPES KÖKSSOFFA I TRÄ (KRONBLOMSSOFFA) 180-200 CM ###	2016-09-22 13:21:09	1856			2	7	2	1	Y	4	1	1	YES	6	1	1
	1	VESNA`S HÅRSALONG Dam, Herr och Barn Klippning, färgning, slingor, permanent, moderna frisyrer, festfrisyrer, bröllopsfrisyrer, naglar. Behandling Velaterapia. Klippning Dam och Herr från 150:- Barnklippning från 99:- Dropp in / Tidsbokning: Tel. ### N N	2016-09-22 13:26:48	1856			3	2	2	1	Y	2	3	1		6	1	1
	1	Motionsdans Bugg och Foxtrot DEGERFORS DANS KLUBB Välkommen GRATIS första gången!! Söndagar Kl. 18:00 – 20:30 Danshallen Hangarvägen 20 Karlskoga Kolla gärna in på Facebook eller på mockelnforeningarna.se Eller kontakt via mail @@@	2016-09-22 13:31:05	1856			3	1	2	1	Y	2	3	1	NO	6	1	1
	1	OSVAJPADE DIAMANTER En drygt timme humor där du kanske hittar kärleken Av och med NN & NN från youtubekanalen GUBBEN Regi NN Fredag 16/9 kl. 19.00 på KUNGSTEATERN, Karlskoga Biljetter: Karlskoga Turistbyrå, tel ###; 1 tim. Innan föreställningen på Kungsteatern Arrangörer Teaterföreningen Lyset, Karlskoga - www.lyset.se, tel ###	2016-09-22 13:41:34	1856			3	2	2	1	Y	3	2	1	YES	6	1	2
Public Place	1	BYGG 25 m² Stugor, förråd, garage. MOSTUGAN HUSUM. Tel. ###	2016-09-20 06:47:07	1852		2	2	2	1	1	Y	3	2	1	NO	1	3	1
Public Place	1	MEDICINSK YOGA i HUSUM KURSSTART söndag 18 september Söndagar 16.00-17.15, 5 ggr 850kr Plats: IOGT-NTO Anmälan med namn och telefon till: NN HATHAYOGA i HUSUM KURSSTART söndag 23 oktober Söndagar 17.00-18.15, 5 ggr 850kr Plats: IOGT-NTO. Anmälan med namn och telefonnummer till: NN	2016-09-27 06:14:32	1852		2	3	2	2	1	Y	2	2	1	NO	3	1	2
Public Place	1	Behöver ni hjälp med att ? Gräva eller rensa ett dike. Byta en vägtrumma Gräva avlopp/vatten Dränering Ta bort stubbar/stenar Ja allt som det kan behövas en grävare till. Eller Lastbilstransporter Ring! ÖNSKA GRÄV ### Vi har F-skattesedel och trafiktillstånd	2016-09-27 06:15:56	1852		2	3	2	2	1	Y	2	2	1	NO	1	3	1
Public Place	1	Svenska kyrkan GRUNDSUNDA FÖRSAMLING MÅNDAG 5/9 – SÖNDAG 25/9. 5 MÅNDAG SEPTEMBER. 10.00 CAFÉ DUVAN MED FAIRTRADE-SHOP KYRKANS HUS Café Duvan med Fairtrade-shoppen öppnar idag i Kyrkans Hus. Öppet måndag – fredag 10.00 – 15.00. PASTORSEXPEDITIONEN HAR STÄNGT FRE 9/9 SAMT MÅN 12/9 11 söndag september 11.00 GUDSTJÄNST ÅSENS KAPELL NN. Servering. Kyrktaxi 18 SÖNDAG SEPTEMBER. 11.00 KONTRAKTSGUDTJÄNS…	2016-09-27 06:17:07	1852		2	17	8	2	1	Y	3	2	1	YES	6	3	2
Public Place	1	Kontraktsgudstjänst med små och stora Medverkar gör barnkörer från flera av kontraktets församlingar, kontraktsprost NN, NN och kyrkclownen NN med flera. Servering. Välkommen hit och fira gudstjänst med oss! GRUNDSUNDA KYRKA, SÖNDAG 18 SEPTEMBER 11.00 Svenska kyrkan GRUNDSUNDA	2016-09-27 06:18:19	1852		2	17	8	2	1	Y	2	2	1	NO	4	3	2
Public Place	1	STUBBFRÄSNING TRÄDPLOCKNING TRÄDFÄLLFING Vi tar bort dina problemstubbar och träd till vettiga priser! RUBB & STUBB Ring NN ### Vi har F-skatt & ansvarsförsäkring. www.rubbostubb.eu	2016-09-20 09:13:54	1857		2	3	2	2	1	Y	3	2	1	YES	6	3
Public Place	1	Träffpunkt Stensätra VAD? Ett nytt café i Stensätrakyrkan, där vi fikar i en enkel gemenskap och träffar nya vänner NÄR? Torsdag 22 sept kl 14-16 Vi sjunger visor och psalmer tillsammans med NN Torsdag 20 okt kl 14-16 Program meddelas senare Torsdag 17 nov kl 14-16 Program meddelas senare Ingen anmälan. Har du frågor – ring NN ### Varmt välkommen!	2016-09-20 09:41:22	1857		2	17	8	2	1	Y	2	2	1	NO	1	3	2
Public Place	1	TRYGGHUND.se Hundägarkurs • Vardagsfostran för valp eller vuxen hund • Skräddarsydd träning för dig och din hund • Personlig coaching där du får den tid du och din hund behöver för att utvecklas tillsammans • Teori och praktiska övningar ingår för att undvika problembeteenden i framtiden Har din hund ett problembeteende ? • Hunden reagerar starkt på ljud • Hunden gör utfall mot människor – andra …	2016-09-20 09:52:16	1857		2	3	7	2	1	Y	2	1	1	YES	6	3	1
Public Place	1	Vind och insynsskydd Vind och insynsskydd till salu. Måtten är 4600 X 3700. Öppningen är 1770. Inköpt år 2008. Nypris 12500:- säljes för 6000:- 7st sektioner b 1800 × h 1800. 1st halvsektion b 900 × h 1800. 1st halvsektion med lutning b 900 × h 1800/900. 9st långa stolpar och 1st kort stolpe. Nedmonterat 2010 och har stått inomhus. Telefon ###. ###.	2016-09-20 09:18:35	1857		2	2	7	2	1	Y	2	2	1	NO	1	3	2
Public Place	1	Årsundaruschen Strandbaden Årsunda Storsjövägen 1, 810 22 Årsunda www.arsundaruschen.com SPELMANSSTÄMMAN för ALLA instrument 6–8 juni 2014 För info eller noter: Ring NN ### eller maila till @@@ Preliminärt program Förstämma fredag kl. 18.00 med kaffe och smörgås. Allspel lördag kl. 13.00 Uppspel av olika grupper från kl. 13.30 (15 min/uppspel enl. lista) Dans från kl. 19.00 - 01.00 (Dansspelning …	2016-09-20 09:40:47	1857		2	18	7	2	1	Y	2	5	1	YES	6	3	2
Public Place	1	FÖRSÄLJINING AV BEGAGNADE BARNKLÄDER OCH SAKER I STENSÄTRAKYRKAN "Både för stora & små barn" LÖRDAGEN DEN 24 SEPTEMBER KL. 10.00-14.00 ÄVEN LOPPIS I KÄLLAREN ! Försäljning av kaffe saft och fikabröd Varmt välkommen ! Ej allmän insamling Svenska Kyrkan OVANSJÖ-JÄRBO PASTORAT	2016-09-20 09:50:51	1857		2	2	1	2	1	Y	2	3	1	NO	4	3	2
Public Place	1	Öppen barnverksamhet hösten 2016 Vuxen med barn från 0 år Lek, prat och fika Ingen anmälan, du kommer och går de tider som passar dig under öppettiden. Verksamheten är kostnad fri förutom om du vill ha fika. Välkomna! Församlingsgården/Järbo, start v 36 Måndagar kl 9.00-11.30 Torsdagar kl 9.00-11.30 Kungsgården/Birgittagården, start v 36 Onsdagar kl 9.00-11.30 Fredagar 9.00-11.30 Ingen babyrytmik…	2016-09-20 09:23:44	1857		2	20	1	2	1	Y	2	2	1	YES	6	3	2
Public Place	1	SKÖNHETSVÅRD I STENSÄTRA FRANSFÖRLÄNGNING NYTT SINGEL 650:- NYTT RUSSIAN EL TAHITIAN VOLYM 850:- SPRAYTAN HELKROPP 250:- BRYNBEHANDLING BL.A BRYNFORM, FÄRGNING, BRYNUTFYLLNAD,LOLA VID BOKNING RING EL SMS ### Fransar-by-Asa.webnode.se FB-Grupp Fransar By Åsa	2016-09-20 09:34:25	1857		2	3	2	2	1	Y	2	1	1	YES	6	1	1
Public Place	1	September 2016 I september startar veckomässorna igen, varje onsdag kl 18.00. Jämna veckor i Storviks kyrka och ojämna veckor Stensätrakyrkan. Varmt välkommen! Onsdag 7 september kl 18.00 Veckomässa i Storviks kyrka NN, präst Sextonde söndagen efter trefaldighet "Döden och livet" Söndag 11 september kl 11.00 Gudstjänst i Ovansjö kyrka NN, präst NN, musiker Mottagandet av ny präst NN och avtacknin…	2016-09-20 09:46:12	1857		2	17	1	1	1	Y	2	2	1	YES	6	3	2
Public Place	1	Har du svårt att komma igång eller få resultat av din träning? Fixa formen med en personlig tränare! • Personlig träning • YinYoga •PowerYoga • Kettlebells • Lär dig Mindfullness Hjälp någon på traven... Ge bort ett presentkort! Innerpower4u.com NN Tel. ###	2016-09-20 09:29:27	1857		2	3	2	2	1	Y	2	2	1	YES	6	3	2
Public Place	1	Hund & Kattägare se hit!!! • Kvalitetsfoder för _ och _ • Kattströ av högsta kvalitet • Massvis av tillbehör FRI HEMLEVERANS För att beställa: Mail: @@@ Ring: ### Smakgaranti	2016-09-20 09:42:12	1857		2	2	2	2	1	Y	2	3	1	NO	6	3	2
Public Place	1	Landstinget Västernorrland PRIMÄRVÅRDEN Vårdcentralen Ankaret Råd vid förkylning Skölj/gurgla med saltvatten; 1 tsk salt blandas med 5 dl vatten Rikligt med dryck Vila Högläge Ev. andningsgymnastik med PEP-flaska	2016-09-20 10:41:36	1852		1	24	5	2	1	Y	2	3	1	NO	5	1	2
Public Place	1	Nätra Hembygdsgård, Bjästa Sommaren 2016 19 juni Hälsans dag med LOPPIS på Logen och SERVERING kl 12.00 - 16.00 Marknad */ och aktiviteter m m i hälsans tecken. NN underhåller. OBS! Start kl 11.00 - Cykeltur tillsammans med Cykelfrämjandet 20 juni - 14 augusti Hembygdsgården med Loppis och Servering, Café Svea och Köpmanhomlens Bruksmuseum öppet alla dagar kl 12.00 - 16.00 24 juni Midsommarfirand…	2016-09-20 10:50:22	1852		2	20	1	2	1	Y	3	5	1	YES	6	3	2
Public Place	1	SteRom CE-certifierat & utvärderat enligt EN12566-3 Behöver du byta avlopp? Minireningsverk PP är en enkel och smidig lösning på ditt avlopps problem. Våra reningsverk är biologiskt aktiverade vilket innebär att vattnet renas till största del av redan befintliga bakterier och mikroorganismer i avloppsvattnet på ett miljö vänligt sätt. Minireningsverket består till skillnad från andra minireningsv…	2016-09-22 06:22:19	1852		2	2	2	1	1	Y	2	2	1	YES	6	3	2
Public Place	1	Har någon sett våran bortsprungna katt som rymde från vår husbil när vi var på auktion. Han heter Råttan och är av rasen Ragdoll Om ni har sett honom ring NN eller NN ### Uppsala eller vårat sommarställe i Östersund semestertid ###	2016-09-22 06:23:12	1852		2	9	7	1	1	Y	2	2	1	NO	1	1	2
Public Place	1	STUBBFRÄSNING Vill ni bli av med era irriterande stubbar på gräsmattan eller på er tomt. Inga problem jag har en bra och snabb lösning på era bekymmer, jag fräser bort era stubbar utan några större åverkan, på bara några minuter, Med ny effektiv maskin. För mer info ring mig på ### NN	2016-09-22 06:24:34	1852		2	3	7	1	1	Y	2	2	1	NO	1	3	1
Public Place	1	Hägglundsgympan GYMMIX GYMPA FÖR DAMER & HERRAR SKÄRPESKOLANS GYMNASTIKSAL START 5 SEPT. måndag Follow the music (Medelgympa) Ny tid & plats! 18.30-19.30 NN, ### måndag Core Ny tid & plats! 19.30-20.30 NN, ### måndag Kondition Ny tid & plats! 20.30-21.00 NN/NN/NN/NN Tisdag Funktionell träning/Core 18.00-19.00 NN, ### Tisdag Pulshöjande/kondition 19.00-19.30 NN, ### Onsdag Afro Aerobics 18.30-19.1…	2016-09-22 06:26:51	1852		2	3	1	2	1	Y	3	1	1	NO	6	3	2
Public Place	1	Smultron & Sång SHOW! söndag 24 juli kl 15.00 Nätra Hembygdsgård Entré till showen 50 kr (under 2 år gratis) I biljetten för barn ingår valfri barnaktivitet Biljetter via ticketmaster.se, Örnsköldsviks Turistbyrå, Nätra Hembygdsförening ###, bokning @@@ FAMILJEDAG kl 12.00 – 16.00, fri entré SERVERING • MARKNAD • HOPPBORG • UTSTÄLLNINGAR • PONNYRIDNING • ANSIKTSMÅLNING • LOPPIS PÅ LOGEN	2016-09-22 06:28:45	1852		2	3	1	2	1	Y	2	3	1	YES	6	3	2
Public Place	1	Nu är det dags för MARKNAD OCH LOPPIS Godtemplargården i ÅTE Lördagen den 24/9 2016 Kl. 11-15 Kom och fynda! Fika. Korvförsäljning. Välkommen ÄVEN FÖRSÄLJNING AV GODTEMPLARDRICKA Arr. 2334 NORRLAND IOGT-NTO	2016-09-22 06:31:43	1852		2	2	1	2	1	Y	4	3	1	NO	4	3	1
Public Place	1	Utställning Bjästaskolans konstprojekt Nätra Hembygdsgård i Bjästa 19 juni–5 juli, Alla dagar kl 12–16 (ej 25-26 juni) Kommande utställningar 6 juli – 24 juli NN och NN Bjästa Konstförening Kulturbroar Nätra Hembygdsförening Studieförbundet Vuxenskolan	2016-09-22 06:33:06	1852		2	20	1	1	1	Y	2	5	1	NO	4	3	2
Public Place	1	PÅ VARVSBERGS RESTAURANGEN LÖRDAGEN DEN 11 JUNI KL. 19.00 Jazzgruppen BLQ Bengt Lindgren Quartet med NN sång. Jazzmusik från 50 och 60 talen. Boka bord tel. ### e-post: @@@	2016-09-22 06:34:02	1852		2	20	2	2	1	Y	2	1	1	NO	6	3	1
Public Place	1	Nätra MARKNAD 8-9-10 juli KORNSJÖ-STRAND	2016-09-22 06:34:45	1852		2	2	2	2	1	Y	2	3	1	YES	6	3	1
Public Place	1	Jubileumskonsert söndag 7 augusti, kl16.00 Nätra Hembygdsgård, Bjästa Musikalisk resa genom hembygdsrörelsens första 100 år Med olika musikstilar och korta berättarinslag så kommer du att under 2 timmar (inkl paus) få känna historiens vingslag och få vara med om en oförglömlig historisk och musikalisk resa. NN NN NN NN Konferencier NN SERVRING Biljettpris 100 kr Ungdom under 18 år 50 kr Barn unde…	2016-09-22 06:38:36	1852		2	20	1	2	1	Y	2	5	1	NO	6	3	2
Public Place	1	Final ! 27 augusti 19.22-00 Serenad KORNSJÖ-STRAND	2016-09-22 06:39:44	1852		2	24	8	2	1	Y	2	1	1	NO	4	3	1
Public Place	1	Serenad Dansmusik från Ångermanland NN & NN	2016-09-22 06:40:23	1852		2	3	2	2	1	Y	2	2	1	NO	5	3	2
Public Place	1	100% LIV Jubileumskonsert Ljungblad & Ådahl 2 september kl 20.00 Nya Parken Örnsköldsvik (f.d Folkets Park) Biljetter 200 kr - www.ticketmaster.se Jubileumshelg 3-4/9 lördag 3/9 19:00 Jubileumskväll med NN, NN, NN, NN, NN, NN, NN, mfl. söndag 4/9 11:00 Gemensam Jubileumsgudstjänst med lokala församlingar i Örnsköldsvik. NN, NN samt deltagare från jubileumskvällen I SAMARBETE MED hoppets stjärna s…	2016-09-22 06:42:42	1852		2	3	2	2	1	Y	3	5	1	YES	6	3	2
Public Place	1	FÖRBJUDET ATT RASTA HUNDEN INOM SKOGSVALLEN	2016-09-20 11:06:18	1857		2	24	8	1	1	Y	2	3	1	NO	5	3	2
Public Place	1	Nedskräpning förbjuden SLÄNG DITT SKRÄP I EN SOPTUNNA. Tack	2016-09-20 11:09:20	1857		2	24	8	1	1	Y	2	3	1	NO	5	3	2
Public Place	1	KOM IHÅG! DET HÄR ÄR BARN LEDARNA STÄLLER UPP IDEELT DET HÄR ÄR PÅ LEK DOMARNA ÄR MÄNSKLIGA DET HÄR INTE VM	2016-09-20 11:11:04	1857		2	24	1	1	1	Y	3	5	1	NO	5	3	2
Public Place	1	STENSÄTRA IF:S 89 hemmamatcher på SKOGSVALLEN 2016-04-23 2016-09-24 VÄLKOMEN ATT SE PÅ MATCH.	2016-09-20 11:14:11	1857		2	18	1	1	1	Y	2	1	1	NO	4	3	1
Public Place	1	SKOGSVALLEN PLANKARTA Stensätra Idrottsförening Planer: A, B, C och D gräsplaner, Grusplan Klubbhuset: wc, omklädningsrum, kök	2016-09-20 11:16:38	1857		2	24	1	1	1	Y	2	4	1	YES	6	3	2
Public Place	1	Dragningslista Promenad-Bingon 11/9 2016 1:a Pris NN SAIK Bandy 2:a Pris NN Ryggakuten 3:e Pris NN Hårvårdprodukter 4:e Pris NN Hårvårdprodukter 5:e Pris NN ICA Björksätra 6:e Pris NN Trebo Brygga 7:e Pris NN Bernö 8:e Pris NN Handsåg 9:e Pris NN Bernö 10:e Pris NN OKQ8 11:e Pris NN Badlakan 12:e Pris NN Kikare 13:e Pris NN Trebo Brygga 14:e Pris NN Noppa Bort 15:e Pris NN Spel 16:e Pris NN Bernö…	2016-09-20 11:24:57	1857		2	18	1	2	1	Y	2	3	1	NO	4	3	1
Public Place	1	Flickor division 4 Stensätra IF flickor 00-03 och Årsunda IF flickor har ett samarbete säsongen 2016. Hemmamatcherna för division 4 spelas vid Årsunda IP och inte vid Skogsvallen Datum-Tid Match mellan lagen Spelplats 2016-05-07 11:00 Årsunda IF / STensätra IF (9-m) - Gefle IF FF Årsunda IP 2016-05-15 11:00 Hagaströms SK - Årsunda IF / Stensätra IF (9-m) Hagaströms IP 2016-05-21 11:00 Årsunda IF …	2016-09-20 11:29:15	1857		2	24	1	1	1	Y	2	1	1	NO	5	3	1
Public Place	1	BOLLNÄS TRAIL RACE ANTA UTMANINGEN 10KM eller 5KM HÄLSINGLANDS FINASTE LÖPLOPP 13 OKTOBER För mer info: www.rehnsbk.nu/trailrace	2016-09-20 11:17:37	1857		2	18	1	2	1	Y	3	3	1	YES	2	3	2
Public Place	1	Information om motionsspår vid Trebo Motionsspåret består av tre slingor: Slinga 1 (elljus) ca 1,2 km Slinga 2 (elljus) ca 1,1 km Slinga 3 ca 1,7 km Sammanbundet är motionsslingan totalt ca 4 km Ellljusbelysningen är tänd från mörkrets inbrott till kl 21.00 För underhåll av skidspår ansvarar Sandvikens Snöskoterklubb ### Sandvikens Kommun Kultur & Fritid	2016-09-20 11:35:32	1857		2	24	4	1	1	Y	2	3	1	NO	1	3	1
Public Place	1	Låna däck att dra! Du behöver: • en sele t.ex. pulkasele eller ryggsäck) • rep att fästa mellan sele och däck (använd gärna rep med viss elasticitet) • karbinhakar för att fästa ihop önskat antal däck Har du frågor eller funderingar kolla facebookgruppen! /Sandvikens däckdragare	2016-09-20 11:34:30	1857		2	24	1	2	1	Y	2	3	1	NO	7	1	2
Public Place	1	JERNVALLEN MULTICENTER TRÄNINGSGRUPPER Hösten -16 JOGGNING/LÖPTEKNIK HÖGBO Måndagar kl 18 Måndagar kl 19, Intervaller Onsdagar kl 18 FUNKTIONELL TRÄNING Folkets Hus; Måndag kl 9 + kl 10 Tisdagar kl 17 Torsdagar kl 16.30 Torsdagar kl 18, start 6/10 Lördagar kl 9 + kl 10 FUNKTIONELL TRÄNING ute: Hedåsbadet torsdagar kl 18 (11/8-29/9) Allkort 900 kr gäller från 8/8-22/12 (gäller för fritt deltagande…	2016-09-20 11:37:36	1857		2	3	2	2	1	Y	2	3	1	YES	3	3	2
Supermarket	1	Monica´s Städ & Allservice Vi utför all sorts städning samt fönsterputsning! Utnyttja skattereduktion - "Rut-avdrag" Ring för mer information ### Vemhån @@@	2016-09-20 13:04:15	1904		1	3	2	1	1	Y	2	1	1	NO	6	1	2
Supermarket	1	KÅRTJÄRNS JAKT FISKE & NATURCAMP En naturskön anläggning i Härliga Härjedalen. Här kan du boka jakt och fiskepaket, eller bara ta det av vad djur och naturlivet erbjuder. Välkommen! För mer information, pris och bokning ring eller maila. NN ### NN ### NN ### @@@ Vi finns även på facebook	2016-09-21 06:08:29	1904		1	3	2	2	1	Y	2	3	1	NO	6	1	1
Supermarket	1	Gruppträning hösten 2016 med HIT Älvdalen Måndagar 17.00 - 17.45 HIIT Cardio Högintensiv intervallträning med fokus på kondition. Ett bra sätt att få mycket träning på kort tid! Ledare NN/NN Tisdagar 18.00 - 19.00 Funktionell träning Intervallpass där du förbättrar din styrka, balans, koordination och rörlighet på samma gång. Roligt och effektivt! Vi använder oss av bräda och en del vikter. Ledar…	2016-09-21 08:50:22	1880		1	3	2	2	1	Y	2	5	1	YES	6	1	2
School	1	“Jag tog en bild av min kompis… Nu då?” 1. Är det en bra bild? Ska den publiceras? JA! NEJ! Du ska vara stolt över det som du delar med andra! Visa bara det ”bästa av det bästa”. JA! 2. Kommer din kompis att gilla bilden? NEJ! Tänk på att vara schysst. Du vill väl inte att dina kompisar ska sprida dåliga bilder av dig, eller? JA! 3. Kan den orsaka problem för din kompis? NEJ! Sprid inte bilder so…	2016-09-21 09:27:46	1914		1	24	1	1	1	Y	2	3	1	YES	2	1	2
School	1	ELEVRÅDSMÖTE ÅK 6-9 Onsdag 14 september Tid: 9.30 Plats: Textilslöjden Välkomna!	2016-09-21 09:28:49	1914		1	13	1	1	1	Y	2	1	1	NO	4	1	1
School	1	Mom's Kitchen Välkommen till Skol- restaurangen Matsedel v.38 Måndag: Stuvade fiskbullar & Potatis Tisdag: Pannbiff, sås & Potatis Onsdag: Korv med bröd & Mos Torsdag: Vänskapslasange Fredag: Lenas kyckling & Pasta	2016-09-21 09:30:53	1914		1	2	2	2	1	Y	2	1	1	NO	5	4	1
Public Place	1	GLENNTOWN IRISH MUSIC FESTIVAL – GÖTEBORG 9-11 SEP 2016 – Lördagskonsert på Brewhouse: Andy Irvine (IRL) Caitlín & Ciarán with Caoimhín Ó Fearghail (IRL) SVante, Tore & Sébastien (SWE/CAN) Workshops i irländskt låtspel, gitarr, sång & dans, samt sessions under hela helgen! Se hela festivalprogrammet på: www.glenntown.se Arrangeras av: TIMSIG TRADITIONAL IRISH MUSIC SESSIONS IN GOTHENBURG I samarb…	2016-09-21 09:47:42	1901		2	3	1	1	1	Y	3	2	1	YES	2	1	2
Public Place	1	Wing Tsun Göteborg Vill du träna effektivt självförsvar? Wing Tsun är ett självförsvarssystem med fokus på snabbhet, effektivitet och balans. Hemsida: www.wingtsungöteborg.com Adress: Landerigatan 9 (i Redbergskyrkans källare)	2016-09-21 09:52:05	1901		2	20	1	1	1	Y	2	3	1	YES	2	2	2
Public Place	1	DANZLAGRET STart 5 september 2016 Danskurser för alla! Ungdom, studerande och vuxna Ny dansskola i Majorna! Barndans fr. 3 år Dansmix 4-9 år Jazz Klassisk balett Hip Hop Breaking Balettlinje 8-12 år Danslinje 13-19 år Zumba Stepp Centralt i Majorna, Fiskhamnsgatan 2 (samma hus som Majornas vårdcentral) @@@ www.danzlagret.se F Danzlagret Majorna	2016-09-21 09:54:08	1901		2	3	1	2	1	Y	3	5	1	YES	6	1	2
Public Place	1	Letar du förskola till ditt barn? Söker du efter en förskola i centrala Göteborg det är ditt barn kan få en trygg och utvecklande vardag i grön miljö? Då är du välkommen till oss på Musica. Nu söker vi barn för höstterminen 2016. Kom gärna och hälsa på! Föräldrakooperativet MUSICA Göteborg Den lilla gröna förskolan på Guldheden. Liten barngrupp med bara 13 barn. Erfaren personal; en pedagog och t…	2016-09-21 09:57:20	1901		2	3	2	2	1	Y	2	2	1	YES	6	2	2
Public Place	1	Stuck in movement Danskollektivet Irrbloss 21 August 2016 kl 16.00 Frilagret Heurlins plats 1 413 01 Göteborg www.gothenborgfringefestival.com Instagram Danskollektivet_irrbloss	2016-09-21 09:59:28	1901		2	20	1	1	1	Y	3	2	1	YES	6		2
Public Place	1	Fikamingel hos KRUKVERKET – keramikverkstad Söndagen den 18:e september klockan 11–14 Vi ses på Fyrverkaregatan 18, Göteborg Ligger i Landala Egnahem vid den lilla dammen Varmt välkomna	2016-09-21 10:02:08	1901		2	20	2	1	1	Y	3	2	1	NO	4		2
Public Place	1	MER ÄN BARA SELFIES... HOBBYFOTOGRAF SÖKER DIG/ER SOM BEHÖVER BILDER AV ER SJÄLVA/POS.VANA. SJÄLV BEHÖVER JAG FOTOVANA/BILDER I MIN PORTFOLIO. VID INTRESSE SMSA ### MVH VICTOR	2016-09-21 10:05:19	1901		2	3	7	1	1	Y	1	1	1	NO	1	1	1
Public Place	1	Lägenhets Bytte En fin tvåa med balkong och 55kvm, Hyra 4600kr Här på Landalabergen Bytets mot en trea eller fyra i det här området Landala. Kappelpltsen TelefonNR: ###	2016-09-21 10:08:16	1901		2	5	7	1	1	Y	4	1	1	NO	1	1	2
Public Place	1	Lägenhetsbyte Finnes 2:a 55 (kvm) hyra 5000 balkong badkar våning 3 ___ gatan Guldheden Sökes : 3:a i det här området	2016-09-21 10:11:04	1901		2	5	7	1	1	Y	2	1	1	NO	1	1	1
Public Place	1	Lägenhetsbyte * Lämnar: en mycket vacker 3e, med en jätte stor balkong på andra våning som har utsikten mot vattentornet i Guldheden, Lägenheten ligger på Dr. Wengbergsgata 4 * Önskar: en tvåa på Landala med balkong	2016-09-21 10:13:08	1901		2	5	7	1	1	Y	1	1	1	NO	1	1	1
Public Place	1	Datorproblem? Ring Samir ### Obs! Gratis felsökning	2016-09-21 10:14:11	1901		2	3	7	1	1	Y	2	1	1	NO	1	1	1
Library	1	Sök stipendium! 10 000kr för att skapa kultur! Håller du på med dans, graffiti, akvarell, rap, film, poesi eller kanske något helt annat? Arrangerar du kulturevenemang av något slag? Du som är 16-25 år kan få pengar i form av kulturstipendium från Landstinget Dalarna. Ansök senast 19 juni på ltdalarna.se/kulturstipendier KULTUR & BILDNING Landstinget DALARNA	2016-09-21 09:49:48	1864		1	24	1	2	1	Y	3	1	1	YES	2	2	2
Library	1	Save the Children helpline (Save the Children) ### Are you a child or a youth and have recently arrived in Sweden?	2016-09-26 11:52:55	1872		1	24	1	1	8	Y	3	3	3	NO	1	1	1
Library	1	Jularbo-dagen 2016 EN KONSERTDAG MED HUVUDVIKT PÅ CALLES OCH EBBES MUSIK ÅRETS MEDVERKANDE: PETER HARRYSON Från ”Så ska det låta” och ”Rederiet” Gitarrist BENGT MAGNUSSON NILS FLÄCKE LEIF GÖRAS MED VÄNNER ANDERS LARSSON LINDA KARLSSON STOCKHOLM ACCORDION CLUB Programledare: Lena Jularbo_Brauner och Håkan Pettersson AVESTA TEATER Frejgatan 1, 774 41 Avesta Lördagen den 5 november 2016 kl. 13.00 Bi…	2016-09-26 11:53:54	1872		1	20	1	1	1	Y	3	2	1	NO	6	1	2
Library	1	20-års jubileum Antik- och Samlarmässa Välkommen till Samlarmässan med Antikt och Kuriosa Copulen, Avesta Folkets Park Lördag 15/10 kl. 9.30-15.00 Fri entré Arrangör: Södra Dalarnas Myntklubb	2016-09-26 11:54:18	1872		1	24	1	2	1	Y	2	3	1	NO	4	1	2
Library	1	Tipspromenader med KORPEN Avesta Säsongsstart söndag 28/8 Tid: 10.00-12.00 Plats: Korpkansliet, Myrg. 10, Avesta Säsongsavslutning söndag 30/10 Veckans specialvinst skänkt av ICA Kvantum Denna vinst dras utöver de ordinarie vinsterna. Alla platsar i KORPEN	2016-09-26 11:55:06	1872		1	24	1	2	1	Y	2	3	1	NO	4	1	2
Public Place	1	Välkommen till Apotek Hjärtat Kungsgatan 11 Öppettider Vardagar 9-18 Lördag 10-15 Kungsgatan 11, Avesta Tel ### Hos oss hittar du alla sorters receptfria och receptbelagda läkemedel. Självklart fungerar e-recept och högkostnadsskydd. Kundkontakt ### apotekhjärtat.se APOTEK	2016-09-21 10:35:03	1864		1	2	2	1	1	Y	2	3	1	YES	6	1	1
Supermarket	1	Gårdsbutik & café Välkommen till det lilla gårdmejeritet i Klövsjö. Öppet tisdag-söndag 12-18. Året om. KULLENS GÅRDSMEJERI KLÖVSJÖ Så här hittar du oss: åk väg 316 genom Klövsjö och sväng in mot Östra Klövsjö- Gårdsmejeri. Kör ca 300 meter, sväng sedan höger vid skylt Kullens Gårdsmejeri. Efter ytterligare ca 300 meter är du framme. Telefon: ### E-mail: @@@ Hemsida: kullensgardsmejeri.se	2016-09-21 10:42:04	1904		1	2	2	1	1	Y	2	3	1	NO	4	1	2
Supermarket	1	SÄLJES Skinn soffor 3 + 2 tel. ###	2016-09-21 10:42:32	1904		1	2	7	1	1	Y	1	1	1	NO	1	3	1
Public Place	1	• Kultur Föreläsning Fridolinsalen, Avesta bibliotek Tisdag 27/9 kl. 18.30 Ond, bråd död i Bryssel och Bergslagen. Indgrid Hedström, deckarförfattaren från Avesta berättar. Entré 50kr/biljett och förköp. Arrangörer: Avesta bibliotek i samarbete med Teaterföreningen och Sensus. SENSUS FOLKARBYGDENS TEATERFÖRENING AVESTA KOMMUN	2016-09-21 10:43:16	1864		1	12	1	1	1	Y	3	5	1	NO	4	1	2
Supermarket	1	BAMSEGYMPA 3-5 år Onsdagar kl. 18.00 Vemdalens skola, gympasalen från vecka 35 150 kr per barn och termin Medlemskap i Vemdalens IF är obligatoriskt för försäkringars skull. Föräldrar som önskar vara med är välkomna ombytta till gympakläder. Välkommen önskar Angelica, Josefin, Sara & Kristina	2016-09-21 10:44:46	1904		1	3	2	2	1	Y	3	3	1	NO	4	1	2
Supermarket	1	SÄLJES Resväskor i olika storlekar Hundbur för liten hund Längd 60 cm Bredd 45 -"- Höjd 45 -"- med dyna galon - tyg Finns i Vemdalen. För mer info ring: ###. ###	2016-09-21 10:46:08	1904		1	2	7	2	1	Y	2	2	1	NO	1	1	2
Supermarket	1	Köp! Sommarens snyggaste väskor i återvunnen plast från Perstorp Design Finns både stora och små Kontakta NN ### @@@	2016-09-21 10:47:43	1904		1	2	2	1	1	Y	2	5	1	NO	6	1	2
Public Place	1	Förändrat uppdrag för akutmottagningen Avesta Lasarett Den andra maj flyttar primärvårdsjouren dagtid vardagar från Avesta akutmottagning till den vårdcentral du är listad på i Avesta, Hedemora eller Långshyttan. Vid behov av vård eller sjukvårdsrådgivning: • På vardagar kl 08.00-17.00 kontaktar du alltid den vårdcentral du är listad på eller 1177 Vårdguiden. • På kvällar 17.00-21.00 och helger 0…	2016-09-21 10:54:05	1864		1	24	5	1	1	Y	3	3	1	YES	6	1	2
Public Place	1	SPRÅKCAFÉ • Träffa nya vänner – Meet new friends • Prata svenska – speak Swedish • Fika – have some coffee Plats/Place: 56:ans café i tågstationen, Krylbo 56 ans café at the train station in Krylbo Tid/Time: Torsdagar 17:00 - 18:30 Thursdays from 5 p.m. to 6:30 p.m. Alla är välkomna! – Everyone is welcome! Vid frågor kontakta/If you have questions, contact NN, ###	2016-09-21 11:02:48	1864		1	16	8	2	1	Y	2	3	3	NO	6	1	2
Public Place	1	Är du ung anhörig till någon med en demenssjukdom? www.facebook.com Ung anhöring i demensens skugga Det finns tre olika åldersgrupper: Yngst 18-30 år 30+ Kom med som medlem	2016-09-21 11:06:10	1864		1	19	1	1	1	Y	2	2	1	YES	7	1	2
Public Place	1	Frisk utan antibiotika Högt pris för att bli frisk en halv dag tidigare. Tillsammans kan vi minska onödig användning av antibiotika För varje antibiotikakur ökar bakterienas motståndskraft mot antibiotika. Om vi använder mycket antibiotika kan det i framtiden bli mycket svårt att behandla allvarliga infektioner. Vi kommer alltid att behöva antibiotika i vår avancerade sjukvård - t ex efter operat…	2016-09-21 11:15:17	1864		1	24	5	1	1	Y	3	3	1	YES	1	1	2
Public Place	1	Landstinget DALARNA Har du synpunkter på vården? Patientnämnden Dalarna	2016-09-21 11:18:09	1864		1	24	5	1	1	Y	3	3	1	NO	5	1	2
Supermarket	1	Toyota Auris 2.2D - 2007 Bra ekonomi, mycket pålitlig och rolig att köra. 177 hk. Fullservad på Toyota. Nästan nya Hakkapelitta 7. Sommardäcken är hyfsade. 15500 mil 52000 kr prutat och klart. @@@	2016-09-21 11:20:38	1904		1	2	7	1	1	Y	2	1	1	NO	3	1	1
Public Place	1	WhoCaresinSweden? A Documentary Triology Tre dokumentärfilmer om antidepressiva medel och om riskerna för samhället. www.whocaresinsweden.com	2016-09-21 11:21:11	1864		1	24	8	1	1	Y	3	3	2	YES	2	1	2
Supermarket	1	Kallelse till stämma Delägarna i Sörvemåns Vägsamfällighet kallas härmed till ordinarie stämma. Datum: Onsdagen den 28/9 2016 kl 18.30 Plats: Vemservice, Östgärdegatan 18B, Vemdalen Ärenden: Årsmötesförhandlingar enligt stadgar. Styrelsen	2016-09-21 11:26:59	1904		1	13	1	1	1	N	2	1	1	NO	5		1
Public Place	1	PINGSTKYRKANS Lp-verksamhet "Missbruksvård på Kristen grund" Öppet kl 9.30-12.00 I Pingstkyrkans café, Myrgatan 29 Kl 9.30-10.00 Kaffe och smörgås Kl 09.45-10.45 Bokning av "matkasse" Kl 10.00-11.00 Sång & musik Kl 11.00-12.00 Fika & gemenskap Kl 11.00-12.00 Utdelning av bokad "matkasse" "Matkassen" har varierande innehåll beroende på vad vi får i leveransen från Ica. LP Dalarna Beroendevård på k…	2016-09-21 11:27:15	1864		1	19	1	1	1	Y	2	3	1	NO	1	1	2
Public Place	1	Kultur Föreläsning Fridolinsalen, Avesta bibliotek Tisdag 20/9 kl. 18.30 Den stora skogsbranden i Västmanland NN , ordf. I Ramnäs-Virsbo Naturklubb och naturinventerare i området, kommer och berättar om hur naturen har återhämtat sig två år efter branden. Fri entré. Vi bjuder på smörgås och te. Gratisbiljetter finns att hämta i Avesta biblioteks servicedisk. Arrangörer: Naturskyddsföreningen Aves…	2016-09-21 11:32:14	1864		1	12	1	1	1	Y	3	3	1	NO	5	1	2
Public Place	1	1177 – nytt nummer till sjukvårdsrådgivningen Från 1 februari 2010 kan du som bor i Dalarna ringa 1177 om du blir sjuk och behöver råd om vård. Erfarna telefonsjuksköterskor svarar på frågor, ger råd och hjälper dig att hitta rätt i vården 1177 Sjukvårdsrådgivningen är öppen dygnet runt. Du kan också besöka www.1177.se. Se våra populära barnfilmer eller sök information bland tusentals texter om s…	2016-09-29 13:37:13	1864		1	24	5	1	1	Y	3	3	1	YES	6	1	2
Public Place	1	www.avesta.se Är du +67 år, och behöver hjälp i din trädgård? Vi hjäper dig med: gräsklippning, häckklippning, lövräfsning, snöskottning och grovsopor. Pris: 175 kr/ timmen Ring och boka tid: Måndag- Fredag 7.30-10.00 Telefon: ### Vi ses! Siva- Service	2016-09-29 13:39:53	1864		1	3	4	1	1	Y	2	2	1	YES	6	1	2
Public Place	1	DALA PRIDE 2016 EN INTERSEKTIONELL NORMKRITISK FESTIVAL 19–24 september – i hela Dalarna Med stor festivalavslutning i Falun lördag 24 september: prideparad 12.00 i Kvarnparken / Falupride på Kulturhus tio14 13.00-21.00. HBTQ INTRO / BLATTEQUEERS / DANS / FLERSAMHET / FEMINISKTISKT SJÄLVFÖRSVAR / NN / ASEXUALITET / FUNKIS / QUEERING SAPMI / FILMVISNING / SPELKULTUR / WORKSHOPS / PRO-BINGO / MED M…	2016-09-29 13:40:56	1864		1	24	1	2	1	Y	3	3	1	YES	2	3	2
Public Place	1	FOTBOLL Örnvallen Lördagen den 17/9 kl.11.00 Div 7 BRUNSKOG IF ÖRNEN U. Entré 30:– Fotbollsektionen	2016-09-21 11:32:59	1914		2	18	1	1	1	Y	2	3	1	NO	4	3	1
Supermarket	1	Vinger Blues & Rock Club Presenterer: SUPERNOVA DOWNTOWN Releaseparty Live 7" + Special Guest Support By: LØRDAG 24. SEPTEMBER 2016 VINGER PUB KL 21.00 18 ÅRS GRENSE Vinger Blues & Srock Club Forhåndssalg av billetter: 150,- / Studenter 100,- (Ticketco - Vbsc.no - Vbsc på Facebook Glomdalen.no) Billetter i dera: 200,- / Medlemmer 150,- / Studenter 100,-	2016-09-21 11:35:20	1914		2	3	1	2	18	Y	3	5	2	YES	6	3	2
Supermarket	1	Bingo Söndagen den 18 september kl. 14.00 spelar vi bingo i Järperuds bygdegård Välkomna. Pro Gunnarskog	2016-09-21 11:51:48	1914		2	20	1	2	1	Y	2	1	1	NO	4	3	1
Supermarket	1	SPACE-CHAIR Mycket skön att sitta i !! Kan hängas i taket eller i ställningen som medföljer. Pris endast SEK 500 Ring ### NN	2016-09-21 11:38:39	1904		1	2	7	2	1	Y	4	2	1	NO	1	1	2
Public Place	1	Gustavsson Hovslageri ### NN	2016-09-21 11:38:48	1914		1	3	2	1	1	Y	3	2	1	NO	1	1	2
Public Place	1	Häljeboda Missionshus Söndag 25 sept. kl.18 Sånggudstjänst med Austamarka Bygdekor NN - andakt Servering ALLA är VÄLKOMNA!	2016-09-21 11:41:42	1914		2	17	1	2	1	Y	2	1	1	NO	4	1	2
Public Place	1	PRO Gymnastiken + Bingo har startat Måndagar 13 00 och 14 00 Välkommna till Folkets hus baren	2016-09-21 11:42:49	1914		1	19	1	2	1	Y	1	2	1	NO	4	1	2
Public Place	1	Missa inte Premiären av: Musikklubben På Gränsen Vi bjuder in till en musikafton som sträcker sig från svenska visor till härlig blues! På scenen står: NN NN NN NN NN Fre 23 Sept. Kl 19.00- 21.00 på Källmans konditori. Kom dit och njut av en god bit mat & dryck (fullständiga rättigheter finns)	2016-09-21 11:43:57	1914		2	20	1	2	1	Y	2	3	1	NO	4	3	1
Supermarket	2	Missa inte Premiären av: Musikklubben På Gränsen Vi bjuder in till en musikafton som sträcker sig från svenska visor till härlig blues! På scenen står: NN NN NN NN NN Fre 23 Sept. Kl 19.00- 21.00 på Källmans konditori. Kom dit och njut av en god bit mat & dryck (fullständiga rättigheter finns)	2016-09-21 11:46:43	1914		1	20	1	2	1	Y	2	3	1	NO	4	3	1
School	1	Talangjakten Sök din framtid och vinn klassresa till Göteborg! Nu kan din klass vinna en resa till Yrkes-EM i Göteborg. Så här enkelt är det att vara med i "Talangjakten" • Filma eller ta en bild på ett yrke som du tycker verkar spännande. • Skriv en kort motivering varför du valde just det yrket. • Du kan ge dig ut på jakt själv eller med dina klasskompisar • Klassen startar ett instagramkonto d…	2016-09-21 11:47:21	1914	1	1	24	1	2	1	Y	3	2	1	YES	6	1	2
Supermarket	1	SCOUTSTART HÖSTEN 2016 Scouterna drar igång för hösten! När: Torsdag 22 september 18:00-20:00. Var: Scoutstugan i Åmotfors, Pappersbruksvägen 2 Hur: Med ett stort leende! Villa: Alla från 7 år upp till 100! Vi hälsa både nya och gamla scouter samt föräldrar välkomna!	2016-09-21 11:47:30	1914		1	20	1	2	1	Y	2	5	1	NO	4	1	2
Supermarket	1	folkrace LBC-racet Hökedalens motorstadion Charlottenberg 17:e sept 10.00 entré 50:-	2016-09-21 11:47:37	1914		2	18	1	2	1	Y	3	5	1	YES	6	3	2
Public Place	1	ZUMBA FITNESS Nu drar vi igång! Tisdag 23 augusti kl 19.00 Charlottenbergs Folkets Hus Onsdag 24 augusti kl 15.45 Åmotfors Folkets Hus Välkomna! NN & NN	2016-09-21 11:50:53	1914		2	18	2	2	1	Y	2	3	1	NO	4	4	2
Public Place	1	PRO CHARLOTTENBERG Har sillsexsa den 11/10 i folkets hus kl 1400 Underhållning Lotteri Sista anmälan 6/10 Ring NN för anmälan ### ( 50kr per person) Välkomna	2016-09-21 11:54:23	1914		2	14	1	2	1	Y	2	5	1	NO	1	1	2
Public Place	1	Pusterom Mandag 19. september kl 19:00 *Williams kaffebar, Kongsvinger *Musikk * Poesi * Kunst * Meditasjon * Refleksjon *Lyttehvile * Symbolikk * Samtale * Lys * Kaffebar Sang: Birgit Brinck * Kunst: Heidi Søbye *Leder for Pusterom: Hilde Dagfinrud Valen Hva skjer når livserfaringerne våre og kulturutrykkene vi liker belyser og utfodrer de klassiske fortellingene i den kristne tradisjonen och my…	2016-09-21 11:57:04	1914		2	20	1	2	18	Y	3	3	1	NO	4	1	2
Supermarket	1	YOGA Höstens kurser 2016 Tis. Mjuk Hathamix 17.30-18.45 Tis. Hathamix 19.00-20.30 Tors. Medicinsk Yoga 17.30-18.45 Tors. Mjuk Hatamix 19.00-20.15 Start v. 37. OBS. Boka plats! Alla nya provar gratis ett pass, vid plats kan du hoppa på kurs hela terminen. Bruksgårdens Hälsocenter Ch-berg. YOGA - starkare, smidigare, avslappnad och tryggare! Hjärtligt Välkomna! NN. Holistisk Yogalärare, Hatha/medic…	2016-09-21 12:08:29	1914		1	18	2	2	1	Y	2	5	1	YES	6	1	2
Supermarket	1	MOVE IT Träning/rörelse för barn 6-11 år Start 1/9 Gympasalen Skolan Torsdagar kl. 18.00–18.45 6-8 år 18.00–19.15 9-11 år Vi börjar alla tillsammans men de yngre slutar lite före de äldre. Träningen är kostnadsfri men man måste vara medlem i VIF för att vara försäkrad. Vi kommer att göra allt möjligt kul! Det kan vara gymnastik, rörelse till musik, lekar, styrketräning, hinderbanor mm. Välkomna! …	2016-09-21 12:29:02	1904		1	18	1	2	1	Y	2	3	1	NO	4	1	2
Supermarket	1	LÖRDAGSDANS Jontez ISLADAN Bjästa 140:- PAUSFIKA INGÅR I PRISET OBS ! LÖRDAG 17 sept kl.19-23 VÄLKOMMEN NÄTRAGILLET www.natragillet.com	2016-09-21 12:37:49	1877		2	20	2	2	1	Y	2	2	1	YES	2	3	2
Supermarket	2	Nu är det dags för MARKNAD OCH LOPPIS Godtemplargården i ÅTE Lördagen den 24/9 2016 Kl. 11-15 Kom och fynda! Fika. Korvförsäljning. Välkommen ÄVEN FÖRSÄLJNING AV GODTEMPLARDRICKA Arr. 2334 NORRLAND IOGT-NTO	2016-09-26 11:03:37	1877		2	2	1	2	1	Y	4	3	1	NO	4	3	1
Supermarket	1	LOPPIS Brogatan 145 894 35 Själevad (Huset mellan Fjäll Räven Outlet/Naturkompaniet och E4an)	2016-09-26 11:07:01	1877		2	3	8	2	1	Y	2	5	1	NO	4	3	2
Supermarket	1	Lövved till salu, kapad 30-35cm. Ring NN ###	2016-09-26 11:09:43	1877		2	2	7	1	1	Y	1	1	1	NO	1	1	1
Supermarket	1	TRAIL ÖVIK 17 SEPTEMBER 2016 1,7KM 3,9KM 6KM 12KM Trailövik – för alla. Äkta trailglädje! Riktigt kul och utmanande. Trailövik är en fantastisk upplevelse. Trailövik består av fyra olika bansträckningar: Minitrail 1,7 km för de yngre upp till 10 år; Motion 3,9 km där sträckan går längs elljusspåret i Själevad; 6 km som går på stigar och elljusspår i Själevad samt 12km som är lite tuffare både vad…	2016-09-26 11:22:16	1877		2	18	1	1	1	Y	3	5	1	YES	6	3	2
Public Place	1	Vinnare av "The Award for the best Speciality Market in the UK" ORIGINALET International STREET MARKET *** 21-24 SEPTEMBER STORTORGET, ÖRNSKÖLDSVIK WWW.MATMARKNAD.NU	2016-09-21 19:36:03	1852		2	20	1	2	1	Y	3	5	2	YES	6	2	2
Supermarket	2	TRAIL ÖVIK 17 SEPTEMBER 2016 1,7KM 3,9KM 6KM 12KM Trailövik – för alla. Äkta trailglädje! Riktigt kul och utmanande. Trailövik är en fantastisk upplevelse. Trailövik består av fyra olika bansträckningar: Minitrail 1,7 km för de yngre upp till 10 år; Motion 3,9 km där sträckan går längs elljusspåret i Själevad; 6 km som går på stigar och elljusspår i Själevad samt 12km som är lite tuffare både vad…	2016-09-22 06:24:21	1852		2	18	1	1	1	Y	3	5	1	YES	6	3	2
Public Place	1	Nybyggt Hundpensionat Toppmodernt hundpensionat/hunddagis i naturskön miljö, strax utanför Örnsköldsvik. Varmt välkomna att boka in ett kostnadsfritt första besök hos oss på Gårdsbacken, detta med syfte att ni sedan ska känna er trygga med att lämna er hund. Mer info på Gårdsbackens hemsida, gardsbacken.se tel. ### eller ### @@@ Gårdsbacken HUNDCENTER	2016-09-22 06:24:28	1852		2	3	2	1	1	Y	3	3	1	YES	6	1	2
Public Place	1	Ni som önskar hyra dansbanan för bröllop och andra fester skall nu kontakta NN Mobil. ### För vinterförvaring av båtar på dansbanan tas kontakt med NN ### Mobil. ###	2016-09-22 06:24:48	1852		2	3	7	2	1	Y	2	1	1	NO	6	3	1
Public Place	1	Behöver du hjälp på din tomt? Fällning av träd, kvistning, röjning och borttransport av virke och ris med traktor utföres. För info och bokning ring ### NN	2016-09-22 06:26:43	1852		2	3	7	1	1	Y	2	3	1	NO	1	1	2
Public Place	1	UPPTÄCK STROKE I TID Misstänker du att någon nära dig har fått en stroke? Kontrollera följande: ANSIKTE kan personen le och visa tänderna? Om ena mungipan hänger - ring 112! KROPPSDEL ARM/BEN kan personerna lyfta armarna och hålla kvar dem i 10 sekunder? Om en arm faller - ring 112! UTTAL kan personen upprepa en enkel mening som "Det är vackert väder idag"? Om personen sluddrar eller inte hittar …	2016-09-22 06:26:56	1852		1	24	3	1	1	Y	3	1	1	YES	6	1	2
Public Place	1	Öppetider Kiosk & Café Måndag: 08.00 - 16.00 Tisdag: 08.00 - 16.00 Onsdag: 08.00 - 16.00 Torsdag: 08.00 - 16.00 Fredag: 08.00 - 15.00 Lördag: STÄNGT Söndag: STÄNGT Välkommen in! / NN & NN	2016-09-22 06:42:40	1852		1	3	2	1	1	Y	2	3	1	NO	4	1	2
Public Place	1	Sandra's frisering Ö-viks sjukhus, Wemer September Erbjudande • 10% rabatt på alla hårvårdsprodukter • Vid färgbehandling ingår plock av ögonbryn (valfritt) Öppettider: Mån-Fre 10:00-17:00 Om annan tid önskas går det att ordna enligt överenskommelse Ring för bokning ### VÄLKOMMEN!	2016-09-27 06:35:22	1852		1	3	2	1	1	Y	2	2	1	NO	1	1	2
Public Place	3	START Res dig. Sträck på dig. Rör på dig. Om två månader är du piggare, gladare och friskare. Motion- det är du värd TÄVLA OCH VINN EN SPAHELG ELLER ETT GYMKORT! Så här gör du för att vara med i tävlingen: * Bestäm dig för att börja motionera. * Anmäl dig till någon eller alla tre tävlingsperioderna. * Anmäl dig senast dagen innan perioderna börjar. TÄVLINGSPERIODER * 1 oktober-30 november 2016 *…	2016-09-22 06:29:04	1852		1	18	2	2	1	Y	3	3	1	YES	2	1	2
Public Place	1	Förebyggande råd • Handhygien • Undvik peta runt ögon och näsa • Hosta och nys i armvecken • Regelbunden, god sömn • God grundkondition • Goda matvanor • Undvik stress • Rökstopp HC Ankaret	2016-09-22 06:41:14	1852		1	24	5	1	1	Y	2	3	1	NO	5	1	2
Public Place	1	När kan antibiotika hjälpa? DIAGNOS EFFEKT AV ANTIBIOTIKA Halsinfektion orsakad av virus Förkylning Luftrörskatarr Vanlig hosta INGEN EFFEKT Lindrig halsfluss med streptocker Öroninflammation 1-12 år Bihåleinflammation TVEKSAM ELLER LITEN EFFEKT Halsfluss med streptokocker Blåskatarr SYMTOMLINDRANDE Borreliainfektion (hudutslag) Klamydia och gonorré Öroninflammation 0-1 år Vissa sårinfektioner MI…	2016-09-22 07:03:21	1852		1	24	5	2	1	Y	2	3	1	YES	6	1	2
Public Place	1	Din Livsstil påverkar Din hälsa och sjukdom • Här på Hälsocentralen Ankaret arbetar vi med livsstilfrågor • Vi frågar Dig om alkohol, tobak, kost och motion	2016-09-22 07:09:18	1852		1	24	5	2	1	Y	2	3	1	NO	5	1	2
Public Place	1	FYSISK AKTIVITET GER POSITIVA EFFEKTER PÅ Koncentration & inlärning Psykisk hälsa Kondition Immunförsvar Självförtroende Smärta Balans & Koordination Muskelstyrka Stress Sömn Hjärna Hjärta & Blodkärl Blodtryck Lungor Mage & Tarm Skelett Senor & Ledband Blodsocker & Blodfetter Sårläkning TRE MÖJLIGHETER TILL EN BÄTTRE HÄLSA 1 Undvik stillasittande 2 Var aktiv i vardagen 3 Träna regelbundet Hälso- …	2016-09-22 07:16:56	1852		1	24	3	2	1	Y	2	3	1	NO	5	1	2
Public Place	4	VI MÖTS PÅ MITTEN MUSIK KOMIK TEATER Av och med Stina Joza och Jens Nilsson FOLKAN ÖRNSKÖLDSVIK 9–10 SEPTEMBER Tid 19:00. Pris: 225 kr. Förköp: Turistbyrån, Ticnet.se, Folkan Örnsköldsvik.	2016-09-22 06:29:33	1852		2	20	2	2	1	Y	3	2	1	YES	6	3	2
Public Place	1	Vardagsträff med silverglans Arnäs Församlingshem Måndagar kl 10-13 Vi träffas för Gemenskap • Andakt • Lyssna till någon gäst Sittande lättgymnastik • Sopplunch (40 kr) • Sång mm. Välkommen hälsar NN (diakon) och NN (arbetsterapeut) Om du behöver kyrktaxi ring Landsjö taxi tel. ### Kultur i samband med SENSUS Svenska kyrkan ARNÄS GIDEÅ TREHÖRNINGSJÖ PASTORAT	2016-09-22 06:30:22	1852		2	17	1	2	1	Y	2	3	1	NO	1	4	2
Public Place	1	Sjukhuspräst NN ### @@@ Svenska kyrkan	2016-09-22 06:31:03	1852		1	24	1	1	1	Y	2	5	1	NO	6	1	2
Public Place	1	Docksta skofabrik 1923 FABRIKSFÖRSÄLJNING MÅNDAG - FREDAG 10-18 LÖRDAG - SÖNDAG 10-16 WWW.DOCKSTASKO.SE Kartongvägen 2, 870 33 Docksta	2016-09-22 06:31:44	1852		2	2	2	1	1	Y	2	2	1	YES	6	3	2
Public Place	1	Skaparcafé Domsjö församlingsgård Tisdag 19.00-21.00 Fika 20 kr Du tar med ditt eget material. Välkommen! Svenska kyrkan SJÄLEVAD MO BJÖRNA	2016-09-22 06:42:53	1852		2	17	1	2	1	Y	2	3	1	NO	4	4	2
Public Place	1	Symöte Gråsparvarna från Bredbyn Värdinnor: NN, NN, NN Torsdag 22 september 13.00 Domsjö församlingsgård Svenska kyrkan SJÄLEVAD MO BJÖRNA	2016-09-22 06:46:54	1852		2	17	1	2	1	Y	2	3	1	NO	4	4	2
Public Place	1	facebook www.facebook.com/stubbsand Gilla Stubbsand på facebook Anslagstavla på nätet, samverka, sprid information	2016-09-22 06:34:54	1852		2	24	1	1	1	Y	2	2	1	NO	7	1	2
Public Place	1	Öppettider Apotek Hjärtat Måndag - Fredag 08–17 Lördag - Söndag 10–14 Välkommen! Apotek Hjärtat Sjukhuset Örnsköldsvik APOTEK ICA	2016-09-22 06:34:56	1852		1	24	2	1	1	Y	3	1	1	NO	4	1	2
Public Place	1	Fynda... ...i vår Second Hand-butik. Genom att handla stödjer du biståndsinsatser i bl.a Albanien och Indien. Öppet Tor 13-16, Lör 10-14 Svedjeholmskyrkans BISTÅNDSCENTER Brogatan 105 Välkommen!	2016-09-22 06:35:06	1852		2	2	1	1	1	Y	3	3	1	NO	4	3	2
Public Place	1	Läs & res Vart vill du åka? Starta en kamratcirkel och fundera över vart ni vill åka. Studiematerial fixar vi och ni kan låna vår datastudio för att söka mer information via nätet.....svårare är det inte. För mer information Ring ABF ### Besök vår hemsida: www.vasternorrland.abf.se eller kom in till oss på Gnistan Välkommen ABF VÄSTERNORRLAND	2016-09-22 06:35:17	1852		2	24	1	2	1	Y	2	5	1	YES	6	2	2
Public Place	1	Arnäs gudstjänster i september Sön 11/9 19:00 Dekarsjögårdens logkyrka Gudstjänst Hela logen sjunger Sön 18/9 11:00 Grundssunda kyrka Kontraktsgudstjänst Barnkörer från kontraktet sjunger Samkväm efter gudstjänsten Sön 25/9 10:00 Arnäs kyrka Höstfest med Mässa La Chorale & Kören Gaudere Lunch i församlingshemmet efter gudstjänsten Medarr: SENSUS Svenska kyrkan ARNÄS GIDEÅ TREHÖRNINGSJÖ PASTORAT	2016-09-22 06:36:59	1852		2	17	1	2	1	Y	2	2	1	NO	4	4	2
School	1	Behöver du prata om det du inte kan prata om? RING TILL OSS ### SKRIV TILL OSS www.hjalplinjen.se KOSTNADFRI PSYKOLOGISK HJÄLP Nationella Hjälplinjen	2016-09-22 06:37:21	1852		1	24	1	1	1	Y	3	3	1	YES	6	1	2
Public Place	1	Nässköljning är bra vid nästäppa orsakad av förkylning eller allergi. RECEPT 1 tesked vanligt bordssalt (utan jod vid längre tids användning), rörs ned i en halv liter ljummet vatten till saltet löses upp. Skölj näsan upprepande gånger dagligen. Smörj med vaselin/nosoil mjukgörande. Rekommenderar att köpa nässköljningsspruta, finns på apoteket. Vid torra slemhinnor i näsan, använd nosoil smörjand…	2016-09-22 06:38:07	1852		1	24	8	2	1	Y	2	1	1	NO	5	1	1
Public Place	2	Kontraktsgudstjänst med små och stora Medverkar gör barnkörer från flera av kontraktets församlingar, kontraktspräst NN, NN och kyrkclownen NN med flera. Servering. Välkommen hit och fira gustjänst med oss! GRUNDSUNDA KYRKA, SÖNDAG 18 SEPTEMBER 11:00 Svenska kyrkan GRUNDSUNDA	2016-09-22 06:40:24	1852		2	17	8	2	1	Y	2	2	1	NO	4	4	2
Public Place	1	VÄLKOMMEN TILL HÖSTENS Tjejkväll ONSDAG 28 SEPTEMBER SHOPPA • MINGLA • FIKA • MYS 18.00-21.00 TA BUSSEN TILL STAN! DIN TUR BJUDER PÅ BUSSRESAN MELLAN KL. 17-22, INOM ÖRNSKÖLDSVIKS KOMMUN. GÄLLER EJ LINJE 10, 40 OCH 100. TÄVLING I BUTIKERNA 18.00-21.00! FÖLJ OSS! CESAM CENTRUM I SAMVERKAN DIN TUR ÖRNSKÖLDSVIKS KOMMUN CESAM.NU	2016-09-22 06:43:59	1852		2	2	2	2	1	Y	3	5	1	YES	6	4	2
Public Place	1	Välkommen till Skeppsmaln! CAFÉ • RESTAURANG • MUSEUM • NATURSTIGAR Besök Fiskevistet med café, restaurang och museum med surströmmingsutställning, Landhöjningsstigen, Fyrstigen och Lotsstigen är populära vandringsleder. www.fiskevistet.se Fiskevistet Surströmmingsmuseet Skagsudde • Skeppsmaln Fiskevistets restaurang öppnar för säsongen 1 juni Öppettider: måndag-torsdag 11.00- 21.00 fredag 11.00-…	2016-09-22 06:44:04	1852		2	3	2	1	1	Y	2	3	1	YES	6	3	2
Public Place	1	ROBERT WELLS THE GOOD MUSIC TOUR ROBERT WELLS TRIO feat. MARIA WELLS BILJETTER ticnet.se alt ### FOLKAN 22/10 www.wellsmusic.se	2016-09-22 06:44:14	1852		2	3	2	2	1	Y	4	2	1	YES	6	3	2
Public Place	2	VÄLKOMMEN TILL HÖSTENS Tjejkväll ONSDAG 28 SEPTEMBER SHOPPA • MINGLA • FIKA • MYS 18.00-21.00 TA BUSSEN TILL STAN! DIN TUR BJUDER PÅ BUSSRESAN MELLAN KL. 17-22, INOM ÖRNSKÖLDSVIKS KOMMUN. GÄLLER EJ LINJE 10, 40 OCH 100. TÄVLING I BUTIKERNA 18.00-21.00! FÖLJ OSS! CESAM CENTRUM I SAMVERKAN DIN TUR ÖRNSKÖLDSVIKS KOMMUN CESAM.NU	2016-09-22 06:51:05	1852		2	2	2	2	1	Y	3	5	1	YES	6	1	2
Public Place	1	FOLKAN TEATER Örnsköldsviks Riksteaterförening En föreställning av och med NN i regi av NN Produktion: Bebopaluba ROCKEN tog mitt liv. Från blockflöjt och mellanöl till Boppers och Bebopaluba. Onsdag 14 september och Torsdag 15 september kl. 19:00 kl. 19:00 Biljetter säljs via ticketmaster och turistbyrån Ö-vik	2016-09-22 06:56:26	1852		2	3	1	2	1	Y	3	5	1	YES	6	3	2
Public Place	2	100% LIV Jubileumskonsert Ljungblad & Ådahl 2 september kl 20.00 Nya Parken Örnsköldsvik (f.d Folkets Park) Biljetter 200 kr - www.ticketmaster.se Jubileumshelg 3-4/9 lördag 3/9 19:00 Jubileumskväll med NN, NN, NN, NN, NN, NN, NN, mfl. söndag 4/9 11:00 Gemensam Jubileumsgudstjänst med lokala församlingar i Örnsköldsvik. NN, NN samt deltagare från jubileumskvällen I SAMARBETE MED hoppets stjärna s…	2016-09-22 07:02:45	1852		2	3	2	2	1	Y	3	5	1	YES	6	3	2
Public Place	1	GALLERI LOKOMOTIV NN ÖKKV's Grafikstipendiat 2015 Lukten av pengar Vernissage 3 september kl. 12 - 15 3 september - 24 september. Måndag-fredag 12-16 Lördagarna 12-15 ingång RESECENTRUM	2016-09-22 07:05:39	1852		2	24	1	2	1	Y	2	2	1	NO	4	3	2
Public Place	1	KONSTUTSTÄLLNING Friluftscentralen, Själevad NN, NN, NN 5 juni – 16 augusti 2016 måndag-torsdag kl 10-21 fredag kl 10-18 lördag-söndag kl 10-17	2016-09-22 07:08:41	1852		2	24	1	2	1	Y	2	2	1	NO	4	3	2
Public Place	2	Vinnare av "The Award for the best Speciality Market in the UK" ORIGINALET International STREET MARKET *** 21-24 SEPTEMBER STORTORGET, ÖRNSKÖLDSVIK WWW.MATMARKNAD.NU	2016-09-22 07:10:29	1852		2	20	1	2	1	Y	3	5	2	YES	6	2	2
Public Place	1	PRESENS Språk & mångfald Umeå Folkets hus Torsdag 6 oktober 2016 www.presenskonferens.se	2016-09-22 07:12:03	1852		2	24	2	1	1	Y	2	3	1	YES	2	3	2
Public Place	2	Vardagsträff med silverglans Arnäs Församlingshem Måndagar kl 10-13 Vi träffas för Gemenskap • Andakt • Lyssna till någon gäst Sittande lättgymnastik • Sopplunch (40 kr) • Sång mm. Välkommen hälsar NN (diakon) och NN (arbetsterapeut) Om du behöver kyrktaxi ring Landsjö taxi tel. ### Kultur i samband med SENSUS Svenska kyrkan ARNÄS GIDEÅ TREHÖRNINGSJÖ PASTORAT	2016-09-22 06:44:25	1852		2	17	1	2	1	Y	2	3	1	NO	1	3	2
Public Place	1	Är på jakt efter VW Bubbla eller VW Buss, årsmodell 1950-1967. Ring eller maila om du har en att sälja, eller om du vet av någon som står någonstans. NN, Nävertjäl ### @@@	2016-09-22 06:58:59	1852		2	2	7	2	1	Y	2	2	1	NO	6	4	2
Public Place	1	Landskapsgränsen mellan Ångermanland, Västerbotten och Åsele lappmark Äntligen! Boken som gör slut på osäkerheten och en gång för alla slår fast var landskapsgränsen går. Samtliga gällande gränsmärken presenteras med foton och koordinaater. Läs böndernas vittnesmål från 1764 omhävdvunna gränsmärken. Ta del av den brännande diskussionen om lappmarksgränsens dragning. Återupplev lantmätarnas möda m…	2016-09-22 06:48:55	1852		2	2	2	1	1	Y	2	2	1	YES	6	3	2
School	1	Ungdomsmottagningen Bergsgatan 9 89134 Örnsköldsvik På umo.se finns karta och information om våra öppettider UM:s telefonnummer ### Välkommen! Landstinget Västernorrland	2016-09-22 06:51:07	1852	2	1	24	5	1	1	Y	2	5	1	YES	6	1	1
School	1	FÖRFATTARBESÖK Arkenbibloteket Måndag 19/9 kl 18.30 Programrummet NN "Kryddade resor: Sydostasien, upplevelser, människor, mat" Följmed på en inspererande resa! Bokförsäljning till förmån för Världens Barn Medarrangör: Kulturens vänner Arkenbibloteket Örnsköldsvik	2016-09-22 06:51:39	1852		1	12	2	2	1	Y	2	5	1	NO	4	4	2
School	1	30 september FORSKARFREDAG En del av europeiska Reseachers' Night Fredag 30 september kl 10-15. Arken, Trekanten Upptäck forskning! Utställningar Örnsköldsviks forskare Fika med en forskare Tipsrunda Öppet hus Åkroken Business Incubator Aktiviteter Satelliten Rosettas pensionering Forskarfredag vänder sig till den breda allmänheten, men en särskild inriktning på barn och unga. Se mer information …	2016-09-22 07:03:17	1852		1	12	4	2	1	Y	3	3	1	YES	2	1	2
School	4	START Res dig. Sträck på dig. Rör på dig. Om två månader är du piggare, gladare och friskare. Motion- det är du värd TÄVLA OCH VINN EN SPAHELG ELLER ETT GYMKORT! Så här gör du för att vara med i tävlingen: * Bestäm dig för att börja motionera. * Anmäl dig till någon eller alla tre tävlingsperioderna. * Anmäl dig senast dagen innan perioderna börjar. TÄVLINGSPERIODER * 1 oktober-30 november 2016 *…	2016-09-22 07:13:28	1852		1	18	2	2	1	Y	3	3	1	YES	2	1	2
School	1	MUSIK VÄSTERNORRLAND www.musikvasternorrland.se Sprakande klezmer med glödande hjärta TZEITE. LÖR 24 sept kl 18:00 Thuleteatern, Örnsköldsvik Förköp via Ticnet Av: Örnsköldsviks Folkmusikförening.	2016-09-22 07:17:53	1852		1	20	2	2	1	Y	3	2	1	YES	2	1	2
School	1	23 oktober NN Kanske Romeo & Julia! KANSKE ROMEO OCH JULIA? Kulturfesten Fri entré | 15:00 - 21:00 | Nolaskolan Musik, film, utställning, presentationer, dans, poesi, konst, teater, installationer och allt vi tillsammans kan komma på. Har du ett bidrag? Anmäl dig senast den 10/10 till @@@ . ÖRNSKÖLDSVIK KOMMUN	2016-09-27 10:25:57	1852		1	24	4	2	1	Y	3	5	1	NO	3	1	2
Public Place	1	FOLKAN TEATER Örnsköldsviks Riksteaterförening Små äktenskapliga brott 1 oktober kl. 19:00 Lisa har just hämtat hem sin make, deckarförfattaren Gilles, från sjukhuset. Han har uppenbarligen utan större framgång behandlats för en total minnesförlust efter en olycka. Hur kommer nu deras liv att gestalta sig om hon inte ens lyckas få honom att inse att hon är hans hustru? Eller kanske vet han det, t…	2016-09-22 06:53:04	1852		2	24	1	1	1	Y	2	5	1	YES	6	2	2
Supermarket	1	JAZZ 28 SEPTEMBER 13:00 Svängiga jazzpärlor NNs swinggrupp och solist NN. 26 OKTOBER 13:00 Höstfärger NN och NN, oboe och piano 12 OKTOBER 13:00 Volontär i Namibia och ambassadör i Malawi NN, företagare berättar om världens fattigaste land. 9 NOVEMBER 13:00 Palliativ vård Vård i livets slutskede med läkaren NN. MUSIK EXTRAWAGANZA 23 NOVEMBER 13:00 Sång- och musikquiz Musikkryss med NN och Aktivkö…	2016-09-22 06:53:11	1852		1	24	1	2	1	Y	2	5	1	NO	4	2	2
Supermarket	2	30 september FORSKARFREDAG En del av europeiska Reseachers' Night Fredag 30 september kl 10-15. Arken, Trekanten Upptäck forskning! Utställningar Örnsköldsviks forskare Fika med en forskare Tipsrunda Öppet hus Åkroken Business Incubator Aktiviteter Satelliten Rosettas pensionering Forskarfredag vänder sig till den breda allmänheten, men en särskild inriktning på barn och unga. Se mer information …	2016-09-22 07:12:35	1852		1	12	4	2	1	Y	3	3	1	YES	2	2	2
Supermarket	1	Bortsprungen KATT Försvann från: Ras: Huskatt färg: Randig Namn: Maja Ålder: 5 år Datum: Vid midsommar Kön: Hona ID-märkning Tatuering Microchip Andra kännetecken Vita tassar och haklapp förövrigt brungrå med svarta ränder.... Mycket kelig... Svarar när man lockar med hennes namn. Är registrerad på SVERAKs id-register. Ägarens kontaktuppgifter Namn : NN Bostadsort: Örnsköldsvik Telefonnummer: ###…	2016-09-22 07:14:19	1852		1	9	7	1	1	Y	2	5	1	YES	6	2	2
Supermarket	1	Alzheimer Sverige Café Örnsköldsvik Onsdagen den 7 september, kl 18:00-20:00 EFS kyrkan/Café UH 1 trappa upp, Lasarettsgatan 9 Överläkare NN Geriatriska kliniken Ö-vik "Så arbetar vi på geriatriska kliniken" Frågestund Vi bjuder på fika Fri entré! Alla varmt välkomna Alzheimer Café vill sprida kunskap och glädje Bilda Sensus Alzheimer föreningen ÖRNSKÖLDSVIK	2016-09-22 07:22:39	1852		1	12	1	2	1	Y	2	5	1	NO	4	2	2
School	1	Om du drömmer om att spela fotboll, ta en fika efter skolan eller att slippa bli bortgift.... ...så kan det vara så att din familj och släkt hindrar dig från att leva det liv du har rätt till. Din familj har rätt att bry sig om dig – men inte att kontrollera, kränka eller hota dig, eller tvinga dig till saker du inte vill. I Sverige finns tydliga lagar för att skydda barn och ungdomar – alla barn…	2016-09-22 06:56:32	1852		1	24	3	1	1	Y	3	1	1	YES	6	1	2
School	1	JOURHAVANDE KOMPIS ### Vardagar mellan kl. 18.00 – 22.00 Helger mellan kl. 14.00 – 18.00 Kan du som är under 25 år ringa oss och prata om det där som du inte vill eller vågar ta upp med någon annan. Självklart får du vara anonym Vill du chatta, besök oss på www.jourhavandekompis.se	2016-09-22 07:13:51	1852		1	24	1	1	1	Y	2	1	1	YES	6	1	1
School	1	Har någon slagit dig, hotat dig, mobbat dig eller tagit dina saker? Du är inte ensam. Det finns hjälp. www.jagvillveta.se BROTTSOFFERMYNDIGHETEN tel ### www.brottsoffermyndigheten.se	2016-09-27 10:41:08	1852		1	24	3	1	1	Y	3	3	1	YES	6	1	2
School	1	STÖDLINJEN FÖR SPELARE OCH ANHÖRIGA ### Det finns hjälp att få Är du orolig över ditt eller någon annans spelande? Ett bra första steg är att ringa STÖDLINJEN. Ett samtal till oss är kostnadsfritt och du som ringer är självklart anonym. Du kan också maila dina frågor till oss via vår webbsida www.stodlinjen.se	2016-09-27 10:41:35	1852		1	24	1	1	1	Y	2	1	1	YES	6	1	1
School	1	Yesterday is history, tomorrow a mystery, today is a gift, that´s why it´s called the present	2016-09-27 10:43:19	1852		1	24	8	2	3	Y	2	3	1	NO	5	1	2
School	1	Självmordsupplysningen www.mind.se MIND För psykisk hälsa	2016-09-27 10:43:20	1852		1	24	1	1	1	Y	3	1	1	YES	2	1	2
Public Place	2	23 oktober NN Kanske Romeo & Julia! KANSKE ROMEO OCH JULIA? Kulturfesten Fri entré | 15:00 - 21:00 | Nolaskolan Musik, film, utställning, presentationer, dans, poesi, konst, teater, installationer och allt vi tillsammans kan komma på. Har du ett bidrag? Anmäl dig senast den 10/10 till @@@ . ÖRNSKÖLDSVIK KOMMUN	2016-09-22 06:57:45	1852		2	24	4	2	1	Y	3	5	1	NO	3	2	2
School	1	Välkommen till Skarphagen gym. Här kan du träna mellan kl. 05:00-23:00 Skarphagen gym går tillsammans med Albrektgym (Albrektvägen 123) under samlingsnamnet Sara & Annas gym. Hos oss köper du ett träningskort och får tillgång till att träna på båda gymmen. Då vi inte har någon receptionstid under sommaren köper du enklast ditt kort inne på Interflora Fresh Blåklinten (granne med gymmet på Albrekt…	2016-09-22 06:58:00	1909		1	3	2	2	1	Y	2	2	1	YES	6	4	2
Supermarket	1	ÖRNSKÖLDSVIKS FOLKHÖGSKOLA Studera mitt i stan! Studier på allmän kurs på folkhögskola ger behörighet att studera på högskolenivå. Efter slutförda studier intygar skolan att den studerande uppnått grundläggande behörighet. Till vissa högskoleutbildningar krävs särskild behörighet, t.ex. Nk2, Ma2, SH 1b, kurser som kan läsas på Örnsköldsviks folkhögskola. "Jobba i din egen takt i mindre grupper" S…	2016-09-22 06:58:02	1852		1	24	3	2	1	Y	2	5	1	YES	6	2	2
Supermarket	1	T&K Hälsa och samtal Vi vill hjälpa dig att hitta ditt personliga välbefinnande! Vi erbjuder! Samtalssession: 500:-/H Personlig träning 500:-/H Kostrådgivning: 500:-/H Temakvällar: 250:-/pers Välkommen att kontakta oss för mer information! Tel: ### Tel: ### www.TochK.se	2016-09-27 10:27:09	1852		1	3	2	2	1	Y	2	3	1	YES	6	2	2
Public Place	1	Nätra MARKNAD Gratis entré kl 11-17 med flera hundra knallar Underhållning Tivoli Serveringar Info ### 8-9-10 Juli KORNSJÖ-STRAND	2016-09-22 07:18:07	1852		2	2	2	2	1	Y	2	3	1	YES	2	3	1
Supermarket	1	Rum el mindre lgh i ö-viksområdet sökes ### NN	2016-09-22 07:05:27	1852		1	5	7	2	1	Y	1	1	1	NO	1	2	1
Public Place	1	KM ALLTJÄNST & Bilservice HB. Vi gör det mesta, Vi utför b.l.a Gårdsstädningar Upphämtning av metallskrot Bortforsling av skrotbilar Trädgårdsskötsel städning, Renoveringar Metallkonstruktioner Rost lagning Dödsboutstädningar M.M Ring oss om vad just du behöver hjälp med. Ring Oss Idag För Mer Information Alltid 220kr Tim Ex Moms Ring Vardagar Mellan 08:00-20:00 Och Helger 12:00-17:00 Varför göra…	2016-09-22 07:08:08	1852		2	3	2	1	1	Y	3	3	1	NO	1	1	2
Supermarket	1	Sökes Lägenhet att hyra 1 rok el 2 rok Gärna i närheten av Sörliden/skyttis eller runt om. ### NN	2016-09-22 07:11:10	1852		1	5	7	2	1	Y	1	1	1	NO	1	2	1
Supermarket	1	Tipspromenad PRO Klockaretorpet Orientering Tips Lotter Skogsbingo Servering Söndagar med början den 25 September Från (pro lokalen)Frans bloms gt. 50-52 Klockan 10-12	2016-09-22 07:13:47	1909		1	24	1	2	1	Y	2	3	1	NO	4	2	1
Supermarket	1	hoppets stjärna www.starofhope.org LÄGG DITT BIDRAG I STUBBEN HJÄLPEN GÅR OAVKORTAD TILL ROMER I RUMÄNIEN HJÄLP OSS ATT BYGGA FLER HJÄLPCENTER I RUMÄNIEN FÖR ROMER hoppets stjärna www.starofhope.org	2016-09-22 07:17:29	1852		1	24	1	1	1	Y	2	3	1	YES	2	2	2
Supermarket	1	KONSERT Good old Days gammalt och nytt presenteras av Trivselkören TORSDAGEN den 29 september Kl 18 00 på THULETEATERN. Vid pianot; Sara Karlsson med musiker. Pris:100 riksdaler. Servering Vinst på entrebiljett! Förköp hos körmedlemmar. Tel. ### -"- ### alt. ### ABF PRO	2016-09-22 07:22:44	1852		1	3	1	2	1	Y	4	3	1	NO	1	2	2
Public Place	1	HEM-ÄGG Pris:2 kr Styck NN ###	2016-09-22 08:16:41	1919		2	2	7	2	1	Y	1	4	1	NO	1	1	1
Public Place	1	Elevrådsmöten åk 7-9 ht 2016 Plats: Biblioteket Tid: Fredagar 9:00-9:40 Datum: 16/9, 21/10, 25/11, 16/12	2016-09-22 08:36:21	1919		2	16	8	1	1	Y	2	3	1	NO	4	1	2
Public Place	1	Företag • Bil • Villa Kontakta mig om din hund- katt- eller hästförsäkring Hemförsäkring i Folksam ger 10% på hund och katt NN Kontor: ### Bostad: ### Mobil: ### @@@ Folksam	2016-09-22 08:17:10	1919		2	3	2	2	1	Y	2	2	1	NO	6	3	2
Public Place	1	GYMPASTART Söndag 25 september kl 18,30 kör vi igång gympan. Vi håller till i gymnastiksalen på Lidens skola. Kom gärna dit och testa!! 150 kr/termin för medlemmar 225 kr/termin för icke medlemmar Har ni frågor kan ni ringa NN ### NN ### IndalsLidens SK Välkomna!	2016-09-22 08:18:28	1919		2	18	8	2	1	Y	2	3	1	NO	1	1	2
Public Place	1	Torsdag 29 September Kl. 18.00 TAGE SEHLBERG & Co Bjuder på underhållning på Mormor Åsas Café Inträde 70 kr inklusive fika 30 kr extra ingår räksmörgås Boka för att garantera en plats Boka biljett på: ### eller mail: @@@	2016-09-22 08:22:01	1919		2	3	2	2	1	Y	2	1	1	NO	6	1	2
School	1	SKRIDSKOSKOLA Sundsvall Konståkningsklubb Med glädje och musik lär vi dig din skridskoteknik I år en egen pojkgrupp! Anmäl dig på vår hemsida www.sundsvallskk.se Vi önskar alla pojkar och flickor från fyra och uppåt varmt välkomna den 27/9 kl.18.00 i A-hallen på Gärdehov	2016-09-22 08:28:44	1919		1	18	1	2	1	Y	2	3	1	YES	2	1	2
Public Place	1	Höstens danskurser Vill du lära dig bugg? Grundkurs mån 18:15-19:45 (start 5/9) Fortsättning 1 ons 18:15-19:45 (start 7/9) Fortsättning 2 sön 17:15-18:45 (start 11/9) Fortsättning 3 ons 20:00-21:30 (start 7/9) Joydansen mån 20:00-21:30 (start 5/9) - allmän dans med bugg och foxtrot Kurserna hålls på Vivansborg i Timrå Välkomna till oss - ta med dina vänner! Anmälan skickas till @@@ Har du frågor?…	2016-09-22 08:34:39	1919		2	3	1	2	1	Y	2	3	1	NO	6	1	1
Public Place	2	folkrace LBC-racet Hökedalens motorstadion Charlottenberg 17:e sept 10:00 entré 50:-	2016-09-22 08:45:24	1914		2	18	1	1	1	Y	2	5	1	YES	6	3	2
Public Place	1	Har noen sett katten vår? Han hører hjemme i Västergården. Han har vært borte siden 4/9. Han er chipet. Ring hvis dere ser han. NN ### NN ###	2016-09-22 08:46:39	1914		2	9	7	1	18	Y	2	2	1	NO	1	1	2
Supermarket	1	NN VINGER KIRKE 13 OKTOBER KL 19:00 INNGANG 280,-	2016-09-22 08:57:11	1914		1	24	1	2	18	Y	3	2	1	NO	4	1	2
Public Place	1	BIG TRACTOR MEET 2016. Se maskinerna som byggde Sverige	2016-09-22 08:59:05	1919		2	18	1	2	1	Y	3	5	1	YES	6	3	2
Public Place	1	DEN LÅNGA VÄGEN TILL NU – EN SKRÖNA FRÅN SKOGEN GAMLA SKOLAN I LÅNGLIDEN Musikteater fredag 7 oktober kl.19.00 Kaffeservering i pausen. Varmt välkommen!	2016-09-22 09:02:09	1919		2	24	1	2	1	Y	3	2	1	NO	4	3	2
Public Place	1	Ansökan om utdelning ur Stiftelsen Bertil Åströmssons fond Stiftelsen har som huvudsakligt ändamål att befrämja och stödja den ideella föreningsverksamhet som bedrivs eller kan komma att bedrivas inom det område som idag geografiskt omfattas av Lidens församling. Sundsvalls kommunstyrelse är förvaltare av stiftelsen och ansökan om utdelning ska insändas till Stiftelsen Bertil Åströmssons fond c/o…	2016-09-22 09:04:01	1919		2	24	1	1	1	Y	2	1	1	NO	1	1	1
Public Place	1	1611 unga röster Återkoppling av LUPP-2015 till UNGA i Sundsvall (13-25 år) Gratis fika! Sundsvalls kommun Torsd. 6 okt. 17.00-19.00 UNGA MAGASINET	2016-09-22 09:07:02	1919		2	24	1	2	1	Y	3	2	1	NO	4	1	2
Public Place	1	Sexuella övergrepp i familjen Du har rätt att känna dig trygg i din familj. Om du utsätts för sexuella övergrepp har du aldrig själv någon skuld eller ansvar för det som har hänt. Ingen i din familj eller släkt får göra något mot dig som känns obehagligt eller som gör dig rädd. Det kan vara svårt att berätta för någon om du utsätts för övergrepp av en person som står dig nära. Men det är aldrig f…	2016-09-22 09:23:11	1919		2	24	8	1	1	Y	2	3	1	NO	5	1	2
Public Place	1	17 juni HELGRILLAD GRIS MIDLAND PÅ SCEN Middag Helgrillad gris med dessert 17.30-20.00 Fredagsmys 19.00-21.00 ENTRÉ exkl middag 100kr/vuxen 50 kr/ungdom 13-17 år Barn 0-12 år GRATIS!	2016-09-22 08:59:09	1919		2	3	2	2	1	Y	2	2	1	NO	4	3	2
Public Place	1	VÄLKOMMEN ORATHAIS MASSAGE BISPGÅRDEN Bra massage, bra priser! Thaimassage-Oljemassage Presentkort 1 tim 400 kr 1½ tim 600kr ### ###	2016-09-22 08:59:29	1919		2	3	2	2	1	Y	2	2	1	NO	1	3	2
Public Place	1	Tessans i Sillre DAGENS LUNCH 10.30-13.00 ALLTID ÖPPET FÖR BOENDE ALLSERVICE ###	2016-09-22 09:00:23	1919		2	3	2	2	1	Y	2	1	1	NO	1	3	2
School	1	ADD US! WE WILL KEEP YOU UPDATED EducationUSA Malmö edusamalmo Education USA Advising Center - Malmö educationusasweden We will be in B1 on Wednesday 14th September giving out candy!	2016-09-22 09:01:34	1883		1	24	2	1	3	Y	3	3	1	NO	7	1	2
School	1	MALMÖ BORGARSKOLA DEBATE SOCIETY TRY OUT DEBATING! Mondays 16:40 ROOM B102 No experience required CAS and FIKA are non-debatable Questions? @@@	2016-09-22 09:04:38	1883		1	12	1	2	3	Y	2	3	1	NO	3	1	2
School	1	NORTH KOREA SOUTH KOREA LIBERTY IN NORTH KOREA MB Hallyu Association Come and join us to learn more D111 Thursdays 16:35-17:35 Get CAS hours Bonus: fika!!!!!	2016-09-22 09:06:41	1883		1	23	1	1	3	Y	2	5	1	NO	4	1	2
School	1	NYU|ABU DHABI Thursday September 22 2016 Coming to visit us! AT 16:00 MALMÖ BORGARSKOLA IN CONFERENCE ROOM 1 (B1) NN will be talking to you about NYU Abu Dhabi	2016-09-22 09:08:37	1883		1	12	1	1	3	Y	2	3	2	NO	7	1	2
Supermarket	1	WISTRÖMS ORKESTER Livs levande: PUBAFTON!! HÄREBORG ENTRÉ: 100.- 24/9 kl 21.00 FÖRKÖP SWISH ### el. BETALA I DÖRREN	2016-09-22 09:02:50	1919		1	3	2	2	1	Y	3	4	1	NO	1	1	2
Supermarket	1	Vippe extensions Send SMS ### E-post: @@@	2016-09-22 09:04:22	1914		1	3	2	1	3	Y	2	3	1	NO	6	2	2
Public Place	1	LIDEN FIBERNÄT Ekonomisk Förening LIDEN FIBERNÄT EKONOMISK FÖRENING Nu ska vi försöka få till ett fibernät i Lidens område. Därför har det startats en ekonomisk förening som heter Liden Fibernät som ska verka för det. Den närmaste tiden kommer intresset för ett fibernät i bygden undersökas. Det kommer att skickas ut information i brevlådor samt representanter för föreningen kommer även att besöka…	2016-09-22 09:05:06	1919		2	20	1	2	1	Y	2	3	1	YES	6	3	2
Public Place	1	LIVET BÖRJAR VID DÖDA FALLET Söndagen den 14 augusti kl. 15.00 En musikalisk livsresa, en resa för dig om det viktiga i livet, sett från en annan vinkel. NN, musikpedagog, sångerska, musiker, låtskrivare och lifecoach NN, coach, terapeut, författare, föreläsare m.m. NN har hela sitt liv varit kreativ. Som barn satte hon upp skolans musikaler, deltog i musik-tävlingar och spelade gärna både gitarr…	2016-09-22 09:05:27	1919		2	20	7	2	1	Y	2	2	1	NO	3	1	2
Public Place	1	FORS HEMBYGDSFÖRENING Välkommen till Fors Hembygdsgård 2016! Vi firar 90 år med Gerålund! Skogsskolemuseet Skolmuseet flyttar i sommar Få info via vår nya hemsida Evenemang på hembygdsgården 2016 MIDSOMMARFIRANDE MUSIKKVÄLL FORSDAGEN MUSIKKVÄLL MUSIKKVÄLL HEMBYGDSGÅRDENS DAG	2016-09-22 09:06:54	1919		2	20	1	2	1	Y	2	3	1	NO	4	3	2
Public Place	1	KULTURBOLAGET PRESENTERAR MESHELL NDEGEOCELLO KULTURBOLAGET MALMÖ 7/10 BILJETTER: KULTURBOLAGET.SE SAMT BILJETTFORUMS KUNDSERVICE ### MESHELL.COM	2016-09-22 09:36:15	1883		2	20	2	2	1	Y	3	2	1	YES	6	2	2
Public Place	1	KATATONIA FALLEN HEARTS OF EUROPE 2016 PLUS SPECIAL GUESTS AGENT FRESCO VOLA SÖNDAG 25.9 MALMÖ – KULTURBOLAGET FREDAG 28.10 GÖTEBORG – PUSTERVIK LÖRDAG 29.10 STOCKHOLM – DEBASER MEDIS	2016-09-22 18:50:59	1883		2	20	2	2	1	Y	3	2	1	YES	6	2	2
Public Place	1	LIVE NATION proudly presents Brit Floyd SPACE AND TIME CONTINUUM WORLD TOUR 2016 THE WORLD´S GREATEST PINK FLOYD SHOW Magnificent... a musical masterpiece LA TIMES 17.10 STOCKHOLM 18.10 MALMÖ SLAGTHUSET 26.10 GÖTEBORG LISEBERGSHALLEN	2016-09-22 18:55:28	1883		2	20	2	2	1	Y	3	2	1	YES	6	2	2
Public Place	1	Brian Wilson celebraTes Pet sounds 50th Anniversary Final performance in its entirety ~along with rare cuts and greatest hits~ with special guests Al Jardine & Blondie Chaplin 7 november 2016 Malmö Live biljetter via Luger.se, Kulturbolaget.se, Ticketmaster.se samt Biljettforums kundservice ###	2016-09-22 18:59:34	1883		2	20	2	2	1	Y	3	2	1	YES	6	2	2
Public Place	1	GREEN DAY REVOLUTION RADIO TOUR WITH SPECIAL GUEST THE INTERRUPT MALMÖ ARENA 28 JANUARI 2017	2016-09-22 19:03:32	1883		2	20	2	2	1	Y	3	2	1	YES	6	2	2
Supermarket	1	HEJ Liten familj önskar hyra hus i charlottenberg eller lite utanför. ALlt är intressant. Nås på Mobil, ej svar så sms gärna så Ringer jag upp. Mvh NN	2016-09-22 09:38:43	1914		1	5	7	1	1	Y	1	1	1	NO	1	1	1
Supermarket	1	VEMHÅNS ISLANDSHÄSTAR Turridning i små grupper för största möjliga upplevelse! Nyhet! Hästaktiviteter för barn & ungdomar Tel ### & ###	2016-09-22 11:07:23	1904		1	3	2	1	1	Y	2	2	1	YES	6	1	2
Supermarket	1	Virus? Seg dator? Känner du att du vill kasta ut datorn genom fönstret? Gör inte det än , låt mig titta på den först. Jag kan ta bort virusen och oftast göra sega datorer snabbare. Kan även göra systemåterställning av Windows 7 och Windows XP , rengöring, installation av intern hårdvara i datorn med mera... Billigt snabbt och smidigt. Tar max 500kr beroende på vad som är fel men oftast billigare.…	2016-09-22 11:24:22	1917		1	3	7	1	1	Y	2	3	1	NO	1	1	1
Supermarket	1	Hej! Jag erbjuder att gå promenad med din hund (Ej morgon). Är en 34 årig kvinna med mycket erfarenhet av stora hundar. Små är dock också välkomna! PS. Mot betalning. Ring gärna och hör mer!	2016-09-27 12:10:44	1917		1	3	7	1	1	Y	1	3	1	NO	1	1	1
Supermarket	1	Lost Army Presenterar KRISTALLERTURNÉN 2016 LALEH Under hösten kommer Laleh tillsammans med en simfonietta och popband göra en omfattande turne med över 30 musiker på scen där de spelar klassiska Laleh-låtar i helt unika versioner. Tillsammans med modern Fantazias under ledning av dirigenten och arrangören Hans Ek kommer de att bjuda på en unik genreöverskridande arenakonsert. 27/11 Karlstad Löfb…	2016-09-27 12:27:40	1917		1	3	2	2	1	Y	3	2	1	YES	6	1	2
Supermarket	1	FÖRSÄKRA DIN KATT FRÅN 1 KRONA/DAG! Din favorit vår specialitet Katt olycksfall är en begränsad försäkring med skydd för olycksfall, så som trafikskador, bitskador och akuta förgiftningar. Veterinärvårdspremien är 300 kr per år. Ditt eget försäkringsombud! Jag heter NN och är specialiserad på häst-, hund-, -katt och smådjursförsäkringar. Kontakta gärna mig så hjälper jag dig att hitta rätt försäk…	2016-09-28 07:04:26	1917		1	3	2	2	1	Y	2	2	1	NO	6	1	2
Supermarket	1	– Eva pallade mer än Adam! KRAV! KRAV-märkt JUL med Lundh & Folkesson. ROSENGRENS 7, 8, 9 och 14, 15, 16 DECEMBER 2016 19.00	2016-09-28 07:12:41	1917		1	3	2	2	1	Y	3	3	1	NO	4	1	2
Supermarket	1	Höstställning KH Konst & Antik De första 100 besökarna fram till 16 september deltar i en utlottning av böcker där NN och NN medverkar. Utställningen omfattar 69 konstverk av skiftande karaktär. Tre konstnärer med örebroanknytning NN (1936) konstnär född i Stockholm. NN (1925-2008): Konstnär född i Storsjö Kapell i Härjedalen. NN (1949) Målare, tecknare och grafiker verksam i Gällersta. Tre örebr…	2016-09-28 08:30:59	1917		1	20	2	2	1	Y	3	2	1	YES	6	1	2
Supermarket	1	Har du problem med huden? Boka konsultation eller behandling. Jag är Diplomerad Ekologisk Hudvårdsterapeut och Botanisk Pedagog. Välkommen att besöka mig på Köpmangatan 49 i Örebro. Med en växtbaserad ekologisk hudvård skapar du både harmoni och skönhet, som stärker,bygger upp och bevarar din hud och hälsa.Kom in och få lite tips och ideer, tillsammans hittar vi rätt lösning! Öppetider Mån-Fre 11…	2016-09-28 08:49:02	1917		1	3	2	2	1	Y	2	2	1	NO	6	1	2
Supermarket	1	MODEVISNING FÖR VÄRLDENS BARN 13 oktober 2016 Medverkar gör: TÖRNQVIST HATTAR & MODE INGMARKS Adolfsons Maika Hand made NOA NOA	2016-09-22 11:30:01	1917		1	20	2	2	1	Y	2	3	1	NO	4	1	2
Supermarket	1	SVETSJOBB! På Bilar Utföres Till Humana Priser NN ###	2016-09-23 07:12:35	1917		1	3	7	1	1	Y	2	1	1	NO	1	1	1
Supermarket	1	Har du bestämt dej för att sluta röka eller snusa? Relief är ledande i Europa när det gäller laserterapi mot nikotinberoende. Behandlingen är effektiv, smärtfri och medför inga biverkningar. Relief www.laser-terapi.se	2016-09-23 07:18:04	1917		1	3	2	1	1	Y	3	3	1	YES	2	1	2
Supermarket	1	Examinerad pianotekniker DAVID LIND stämmer, reparerar och justerar Pianon och flyglar Dragspel, fioler och gitarrer Tel. ### Mob. ###	2016-09-23 07:22:16	1917		1	3	2	1	1	Y	3	3	1	NO	1	1	2
Supermarket	1	målar´n stepps du ringer vi fixar ### NN Målare @@@	2016-09-23 07:31:13	1917		1	3	2	1	1	Y	3	3	1	NO	6	3	2
Supermarket	1	Sälges Solarium helt över Tel: ### Pris: 400 kr ___ gatan 7 Örebro	2016-09-23 07:37:32	1917		1	2	7	1	1	Y	1	1	1	NO	1	1	1
Supermarket	1	EN SVART KATT ! Är det någon som saknar en svart hon-katt, ganska mager som strövat runt vid Oskarstorget? Den har inget halsband och är inte öronmärkt. Den verkar vilsen. Hör av Er Tele: ###	2016-09-23 10:23:40	1917		1	9	7	1	1	Y	1	1	1	NO	1	1	1
Supermarket	1	Hej! Jag är en glad och social tjej på 15 vintrar som heter Nathalie som söker extrajobb! Jag gillar att umgås med mina vänner, familjen och mina 3 katter. Jag älskar både barn och djur så är det någon som behöver hjälp med det är jag den rätta Även om det är andra saker som ni behöver hjälp med! Jag går i skolån på dagarna så kan jobba efter 16 och helger om det skulle behövas. Bor i Tybble men …	2016-09-23 10:38:26	1917		1	3	7	1	1	Y	2	2	1	NO	1	1	2
Supermarket	1	Galakväll för världens barn 200 elever från Örebro kulturskola Dans, musik, teater Gästartist: Boris René Hela galan teckenspråktolkas Biljettpris: 100:- för vuxna, 50:- för barn upp till 16 år. Serviceavgift tillkommer. Köp biljetter på ticketmaster.se eller på Örebrokompaniet. Alla intäkter går oavkortat till Världens Barn. Kom ihåg att ta med kontanter om du vill hjälpa oss att fylla bössorna …	2016-09-28 08:41:15	1917		1	24	1	2	1	Y	3	3	1	NO	4	1	2
Supermarket	1	DIGAMBARA AV VIRPI PAHKINEN RIKSTEATERN Hjalmar Bergmanteatern Örebro Onstag 30 november kl 19.00 Biljetter: www.tickster.com / Direkten Nöje / Örebrokompaniet Arrangör: Örebro Riksteaterförening	2016-09-28 08:51:08	1917		1	3	2	2	1	Y	3	5	1	YES	2	1	2
Supermarket	1	EYRA CAFÉ & BISTRO ÖPPETTIDER MÅN-TORS 7-19 FRE 7-18 LÖR-SÖN 9.30-16.00 Frukostbuffe Sallader Varma rätter Barnmeny Mackor Grillade mackor Kalla & Varma drycker Glass Smothies VÄLKOMNA TILL EYRA CAFE & BISTRO FÖR BESTÄLLNING: RING ### EYRAGATAN 3, ÖREBROEYRACAFEBISTRO.SE EYRA CAFÉ & BISTRO	2016-09-28 09:53:40	1917		1	3	2	1	1	Y	3	5	1	YES	6	1	2
Supermarket	1	Fina gitarrer säljes! Till vänster: En mycket fin Alhambra gitarr som fått mycket beröm för dess klang. Modellen är en "Muro de Alcoy" av storleken 1C. Gitarren är lika bra till nybörjare som till erfarna. I priset ingår ett fodral och en fotpall samt ett Capo och en stämapparat. Pris 4000 kr Till höger: En mycket fin Cataluna gitarr. Denna är något mindre än Alhambra gitarren till vänster. I pri…	2016-09-28 10:04:15	1917		1	2	7	1	1	Y	2	2	1	NO	1	3	2
Supermarket	1	Antikt, kuriosa, loppis, Säljer, köper byter Ring för visning ###	2016-09-28 10:08:33	1917		1	2	7	1	1	Y	2	2	1	NO	1	1	2
Supermarket	1	MATRÄTTEN – för allas rätt till mat NN är två år gammal. Hon är en av 795 miljoner människor som ofta äter för lite, för näringsfattigt och för sällan. Trots att mat är en mänsklig rättighet. Trots att jordens resurser skulle kunna föda oss alla. Var med och bekämpa en av världens största orättvisor! SMS:a MAT till 72905 och ge 100 kr Svenska kyrkan INTERNATIONELLT ARBETE	2016-09-25 16:22:37	1855		2	24	1	1	1	Y	3	2	1	NO	5	3	2
Supermarket	1	DEN KÄNSLAN 800 miljoner människor kan aldrig äta sig mätta. Tusentals barn dör varje dag av undernäring och brist på mat. Skyfall, torka och allt extremare väder förstör skördar för människor som är beroende av jordbruks för sin överlevnad. Dela med dig och utrota hungern. SMS:a HUNGER till 72905 och ge 50 kr till utbildning, lån och sparande samt hållbara jordbruksmetoder. UTROTA HUNGERN! SMS:a…	2016-09-25 16:28:08	1855		2	24	1	1	1	Y	3	3	1	NO	1	3	1
Supermarket	1	NYHET! STARTAR VECKA 37 TORSDAGAR MELLAN 18:30-19:30 ChiBall Det bästa från Yogan, Taili, QiGong & Pilates. I handen har man en mjuk aromaboll till hjälp med både balans och självmassage. Torsdagar 18:30–19:30 på Församlingshemmet Örnsköldsvik 1300:- inkl. boll och matta Anmälan till Korpen Tel: ### eller e-post: @@@ KORPEN Tjänstemannagatan 3 892 50 Domsjö	2016-09-25 16:36:45	1855		2	18	2	2	1	Y	2	2	1	NO	6	1	2
Supermarket	1	Sommar BINGO! Drive-In-Bingo Billsta IP JUNI - JULI - AUgusti Väg 348 - 4 km från E4 BILLSTA IF Söndagar kl. 17:00 Kassan öppnar 15:45	2016-09-25 16:40:23	1855		2	24	1	2	1	Y	2	3	1	NO	4	1	2
Supermarket	1	Konstkafé Perorgården Östergensjö, Bredbyn Konstutställning, servering i gammal miljö Lördagar o söndagar, juli månad, kl 13-17 VÄLKOMNA! www.ostergensjo.se ###	2016-09-25 16:45:36	1855		2	3	2	2	1	Y	2	2	1	YES	6	3	2
Supermarket	1	SANNEX ÅRETS DANSBAND 2014 & 2015 OLYMPIA LÖRDAG 1 OKT 2100–0100	2016-09-26 06:32:52	1855		2	3	2	2	1	Y	4	2	1	NO	5	1	2
Supermarket	1	Ägare till katt sökes ! Denna katt söker sin ägare, är mager, tovig och smutsig och har gått ute en längre tid. Är det din katt eller vet du vem som äger den, ring Länsyrelsen ### telefontid vardagar mellan 9-12	2016-09-26 06:35:21	1855		2	9	3	1	1	Y	2	2	1	NO	1	3	2
Supermarket	1	Café & Minibageri • Glassbar Sia Unik butik med fantastiska smaker Ekologiska produkter SKAFFERI KARLSSON Café & Butik 2 mil söder Örnsköldsvik Öppet: Mån-fred. 11.00-19.00 Lördag 11.00-17.00 UTESERVERING Nätragatan 22A 893 30 BJÄSTA CENTRUM ### www.facebook.com/skafferikarlsson1	2016-09-26 06:38:49	1855		2	2	2	2	1	Y	3	2	1	YES	6	3	2
Supermarket	1	Öppnar onsdag 7 oktober HEMBYGDSFÖRENINGENS SECONDHAND NÄTRAGATAN 23 • BJÄSTA Öppnar onsdag 7 oktober ÖPPETTIDER HÖSTEN 2015 ONS, TOR, FRE 11-17 LÖR 11-14 Kläder Husgeråd Mattor Prydnader Glas Lampor Möbler mm Har du saker att skänka så tar vi tacksamt emot detta – även möbler LÄmna in när vi har öppet och under övriga tider enligt överenskommelse. Kontakta oss om du behöver hjälp med att hämta s…	2016-09-26 06:40:56	1855		2	2	1	2	1	Y	3	3	1	YES	6	3	2
Supermarket	1	HUMANRESURS inbjuder till kostföreläsning Torsdagen den 20/10 har vi glädjen att kunna erbjuda en föreläsning med NN som arbetar som näringsfysiolog, författare och föreläsare. Hon kommer då att föreläsa om kostens betydelse vid övervikt och diabetes. NN har skrivit många böcker bl.a "Diabetes, du kan själv påverka" NN medverkar i TV och i hälsotidningen Tophälsa som kostexpert. Plats: 20/10 -16,…	2016-09-26 06:42:38	1855		2	12	2	1	1	Y	2	2	1	NO	4	1	2
Supermarket	1	Jajamen NÄR DU VILL MER Vad behöver du hjälp med? Vad behöver du hjälp med? Vår seniorkonsulter kan hjälpa dig med allt möjligt. Här följer en rad exempel på sådant som kan underlätta din vardag. • Snöskottning • Målning • Fönsterpustning • Snickerijobb • Elarbeten • Behov av medmänniska • Däcksbyten • Stryka kläder • Barnpassning • Laga mat • Städa garaget • Köra skräp till soptippen • Gardinbyt…	2016-09-26 06:43:43	1855		2	3	2	1	1	Y	2	5	1	NO	6	3	2
Supermarket	1	Hund och Katt Hotell Dog-Hus HundDAGIS Från 1 timme till 1 hel månad tar vi hand om din hund på bästa sätt. 1, 2, 3, 4 eller 5 dagar dagisvecks är tillgänglig. HundPENSIONAT Omdu bokar din resa bör du samtidigt boka en plats för din hund i DOG-HUS I Ullånger Vi ger din hund daglig omsorg när du ska åka på semester. Rastgård / DOGWalking Kanske din hund lever ute i egen rastgård och inte kan vara …	2016-09-26 06:49:59	1855		2	3	2	2	1	Y	2	3	1	YES	6	3	2
Supermarket	1	GAMLA SAKER Örnsköldgatan 18 Möbler, lampor, klockor, prydnadssaker, kuriosa m.m. Öppettider, ring för info. Träffas säkrast efter kl. 18.00 Tel. ###, ###	2016-09-26 06:52:56	1855		2	2	2	1	1	Y	2	1	1	NO	1	3	1
Supermarket	1	Äpplets dag Lördag den 24 september kl. 10-15 på torget i Örnsköldsvik. Pomolog NN sortbestämmer dina äpplen Ta med 5 fina äpplen av vaje sort. Kostnad 20:-/äppelsort. Kl 12-15 finns NN från UmeMust på plats med information, provsmakning och försäljning av äppelmust. Demonstration av litet handdrivet musteri NN från Norrträdgård visar hur du beskär ditt äppelträd Information och demonstration av …	2016-09-26 06:54:07	1855		2	20	1	2	1	Y	3	2	1	NO	4	3	2
Supermarket	1	ÖRNSKÖLDSVIKS FOLKHÖGSKOLA Världens män Både svenska och utlandsfödda En kurs för Dig som: - vill öka dina möjligheter att få arbete - vill ta del av andras kukturer - vill lära känna det svenska samhället - vill träna det svenska språket - tycker om skapande verksamhet Vi arbetar utifrån en helhet där teori och praktik blandas. Vi jobbar med personlig utveckling för att stärka deltagarens självk…	2016-09-26 07:00:33	1855		2	24	3	1	1	Y	3	5	1	YES	6	1	2
Supermarket	3	23 oktober NN Kanske Romeo & Julia! KANSKE ROMEO OCH JULIA? Kulturfesten Fri entré | 15:00 - 21:00 | Nolaskolan Musik, film, utställning, presentationer, dans, poesi, konst, teater, installationer och allt vi tillsammans kan komma på. Har du ett bidrag? Anmäl dig senast den 10/10 till @@@. ÖRNSKÖLDSVIK KOMMUN	2016-09-26 07:01:43	1855		2	24	4	2	1	Y	3	5	1	NO	3	1	2
Supermarket	1	MEJERIVÄGEN GULLÄNGET Ledig Lokal 300kvm. Ledig:1a Nov 2016. Stor Parkering Hyra: 9000kr/Månaden. Kontakt: NN ###	2016-09-26 07:06:49	1855		2	5	7	1	1	Y	2	2	1	NO	1	1	2
Supermarket	1	Py Bäckman Vid flygeln Rune Broberg NÄTRA KYRKA FRE 7/10 19.00 Pastoratets körer medverkar Förköp Nätra pastorsexp och Sidensjö f-hem Pris 50:- Välkomna!	2016-09-26 07:08:33	1855		2	20	1	2	1	Y	3	2	1	NO	4	1	2
Supermarket	1	ÄNGETGYMPAN Gympa för DAMER & HERRAR Ängetskolans gymnastiksal start 11 jan. Måndag: Core-training styrka och stabilitet Fortsätt gärna på efterföljande pass för lite konditionsträning 19.00-20.00 NN tel. ### Måndag: Follow The Music Medelgympa 20.00-21.00 NN, ### Tisdag: Latinomove Specelsalen 19.00-20.00 NN, ### SKÄRPESKOLAN Gympa för DAMER OCH HERRAR Skörpeskolans gymnastiksal start 12 jan. Ti…	2016-09-26 07:11:26	1855		2	18	1	1	1	Y	2	3	1	NO	5	3	2
Supermarket	3	Vinnare av "The Award for the best Speciality Market in the UK" ORIGINALET International STREET MARKET *** 21-24 SEPTEMBER STORTORGET, ÖRNSKÖLDSVIK WWW.MATMARKNAD.NU	2016-09-26 07:13:03	1855		2	20	1	1	1	Y	3	5	2	YES	6	1	2
Supermarket	3	VÄLKOMMEN TILL HÖSTENS Tjejkväll ONSDAG 28 SEPTEMBER SHOPPA • MINGLA • FIKA • MYS 18.00-21.00 TA BUSSEN TILL STAN! DIN TUR BJUDER PÅ BUSSRESAN MELLAN KL. 17-22, INOM ÖRNSKÖLDSVIKS KOMMUN. GÄLLER EJ LINJE 10, 40 OCH 100. TÄVLING I BUTIKERNA 18.00-21.00! FÖLJ OSS! CESAM CENTRUM I SAMVERKAN DIN TUR ÖRNSKÖLDSVIKS KOMMUN CESAM.NU	2016-09-26 07:13:16	1855		2	2	2	2	1	Y	3	5	1	YES	6	1	2
Other	1	1 okt. Lönelördag och framförallt bäst av allt.... THE NINETIES is back STICKY FINGERS TOP FLOOR LÖRDAG 1 OKTOBER more info www.stickyfingers.nu	2016-09-22 12:26:36	1901	1	2	3	2	2	1	Y	3	2	2	YES	2	3	2
Public Place	1	Till Salu! 3000 l. Avloppstank 80 x 80 cm cementplattor Tel: ### (NN)	2016-09-22 12:39:03	1852		2	2	7	1	1	Y	1	1	1	NO	1	3	1
Public Place	1	2015-07-11 Hyra pråm Pråm bokas i kalender, uppge namn och fastighetsbeteckning vid bokning DAGSHYRA PRÅM Hyra medlem i samfälligheten: 1:a dag 100 kr från dag 2 och framåt 50 kr. Hyra betalas in till bankgiro 639-5453, ange namn och fastighet på inbetalningen. Betalning 30 dagar netto. Hyra övriga: 1:a dag 1,000 kr från dag 2 och framåt 500 kr Hyra betalas in till bankgiro 639-5453, ange namn på…	2016-09-22 12:47:39	1852		2	6	1	1	1	Y	2	3	1	NO	1	3	1
Public Place	1	BEVAKNING MOT INBROTT Samverkan mot brott Båtsamverkan Polisen Försäkringsbolagen Båtorganisationerna www.samverkanmotbrott.nu	2016-09-27 10:23:55	1852		2	24	3	1	1	Y	3	3	1	YES	2	4	2
Public Place	2	Välkommen till Skeppsmaln! CAFÉ • RESTAURANG • MUSEUM • NATURSTIGAR Besök Fiskevistet med café, restaurang och museum med surströmmingsutställning, Landhöjningsstigen, Fyrstigen och Lotsstigen är populära vandringsleder. www.fiskevistet.se Fiskevistet Surströmmingsmuseet Skagsudde • Skeppsmaln Fiskevistets restaurang öppnar för säsongen 1 juni Öppettider: måndag-torsdag 11.00- 21.00 fredag 11.00-…	2016-09-27 10:29:01	1852		2	3	2	1	1	Y	2	3	1	YES	6	3	2
Other	1	A SPECIAL REGGAE FESTIVAL LÅNGSTA RASTA 2016 GENERAL KNAS FASTPOHOLMEN(DK) ROOTVÄLTA - SKA'N'SKA LÖSTFOLK - JUNIOR NATURAL COMANDANTE CRICKET - FYA BRYTE(DM) TWANG SYSTEM - ANTONIO D - WILLMAN SVENSK REGGAE OSLO MASSIVE(NO) (KASIMBA - MARWIN BLESS - CHARLY CHANTER - HASSMAN - DJ PATUU) KAJSA KARP - REGGAEONEN - GRÖNA ARKEN - LBSB LINNEA VIBES - INFINITY SOUND - DJ RANKIN - JOYFUL SOUND 12-13 AUGU…	2016-09-22 13:29:05	1864		2	3	2	2	1	Y	3	3	2	YES	2	3	2
Other	1	Jularbo Gille 17 Augusti kl. 19.00 grytnashembygdsforening.se Grytnäs Hembygdsförening På Grytnäs Gammelgård Serveringen öppnar 18.30	2016-09-27 10:42:48	1864		2	3	1	2	1	Y	2	3	1	YES	2	3	2
Other	1	PLAZA • RE ALLA BYGG - OCH REPARATIONS ARBETEN ###	2016-09-27 10:44:41	1864		2	3	2	1	1	Y	2	3	1	NO	1	3	2
Other	1	SAMLARMÄSSA Med Antikt och Kuriosa Lördag 17 oktober KL. 09.30 - 15.00 Cupolen, Avesta Folkets Park Entré 20 kr, kaffe/the ingår i entréavgiften Servering finns VÄLKOMNA! Arrangör: Södra Dalarnas Myntklubb Info: ###	2016-09-27 10:48:34	1864		2	24	1	2	1	Y	2	1	1	NO	1	3	1
Other	1	DÖDA FALLEN	2016-09-27 10:49:24	1864		2	24	8	2	1	Y	3	3	1	NO	5	4	2
Supermarket	1	Tillgänglighetspriset 2016 Ett Haninge för alla Vi behöver ditt tips! Vet du någon, det kan vara en person, en förening eller ett företag, som bidragit till att samhället har förbättrats för personer med funktionsnedsättning? Tipsa oss om vem som ska få tillgänglighetspriset från det kommunala handikapprådet. Priset delas ut i fyra kategorier: • Fysisk tillgänglighet • Tillgänglig information och…	2016-09-22 14:10:40	1866		2	24	4	2	1	Y	3	5	1	YES	6	3	2
Supermarket	1	GRUPPTRÄNINGAR | SEMINARIER & KURSER | PRIVATTRÄNINGAR MINSKA RISKERNA - ÖKA CHANSERNA VÄLKOMNA! ALLTID FRI PROVTRÄNING T3 SJÄLVSKYDD ### | @@@ | www.facebook.com/sjalvskydd VI HAR ALLTID NÅGOT PÅ GÅNG - FÖR AKTUELL INFO: www.t3sjalvskydd.se	2016-09-22 14:19:55	1866		2	18	2	2	1	Y	3	2	1	YES	6	3	2
Supermarket	1	FAMILJEFEST 24 SEPTEMBER, KL 11-15 PRÖVA STYLTOR JONGLERA ANSIKTSMÅLNING GÖR EN TIGERMASK CLOWN PÅ BESÖK CIRKUS KOM & FYNDA! LOPPIS 24 & 25 SEPTEMBER KL 10.00-15.00 KOMMANDE FAMILJEFESTER: HALLOWEEN 29 OKTOBER FAMILJEFEST 19 NOVEMBER JULFEST 10 DECEMBER Centrum BRANDBERGENS CENTRUM	2016-09-22 19:15:24	1866		2	3	2	2	1	Y	3	3	1	NO	4	3	2
Supermarket	1	Vem utför den nazistiska affischeringen av Haninge? Inka Tattoo Inka tattoo har i många års tid terroriserad hela Haninge Kommun med spridning av nazistiska trycksaker. Detta har skett På kommunens anslagstavlor, på papperskorgar, lyktstolpar och i många bostadsområden. Tycker du att det är oacceptabelt? Ta ett steg för att stänga INKA TATTOO och få slut på terrorn! Kontakta Haninge kommun och kr…	2016-09-22 19:17:16	1866		2	24	8	1	1	Y	2	1	1	NO	1	3	1
Supermarket	1	100 % REN TRÄNING - en föreläsningskväll om idrott och antidoping I Haninge kommuns Idrottspolitiska program finns ett mål som handlar om att majoriteten av idrottsföreningarnas ledare ska ska få kunskap om och verktyg för att bemöta frågor kring doping. För att nå detta mål erbjuder kommunen en föreläsningskväll kring ämnet och inleder arbetet med att uppmana alla föreningar till att genomföra R…	2016-09-23 13:28:17	1866		2	12	4	1	1	Y	3	5	1	NO	3	3	2
Supermarket	1	Äldremässa i Haninge - seniorernas "after work" 30 september kl 10.00 – 18.00 Haninge kommunhus 10.00 invigning av Äldremässan NN - förvaltningschef äldreförvaltningen NN - äldrenämndens ordförande 10.30 – 11.30 Psykisk hälsa hos de äldre NN - handläggare på SKL (Sveriges kommuner och landsting) 10.30 – 11.30 Sotamuistot ja kertomisen merkitys 11.30 – 11.45 Utmärkelse Årets seniorinsats 12.00 – 1…	2016-09-23 13:44:45	1866		2	24	4	2	1	Y	3	5	1	YES	2	3	2
Supermarket	1	LIONS Butiken som ligger i Gamla Runstensskolan har öppnat igen efter sommar-uppehållet! Vi erbjuder det mesta i secondhandartiklar och i fint skick. Vi säljer inte möbler, kläder och skor. Öppet lördagar kl.10-15 och söndagar kl.11-15. Försäljningsnettot går oavkortat till vår omfattande hjälpverksamhet. Du skall känna dig hjärtligt Välkommen! LIONS CLUB ÖSTERHANINGE	2016-09-25 16:35:56	1936		2	2	1	2	1	Y	2	3	1	NO	4	3	2
Supermarket	1	ABF SÖDERTÖRN BREMER I BRANDBERGEN Onsdagen den 7 september Arrangörer: ABF Södertörn, Årstasällskapet för Fredrika Bremer-studier, Bibliotek i Brandbergen, Bio Cosmopolite och Haninge kultur Workshop 15:30-17:45 Bibliotek i Brandbergen Workshop som ingår i projektet Bremers budskap. Ungdomar är välkomna att i Fredrika Bremers anda samtala och skapa genom att skriva, måla, fota och/eller musicera…	2016-09-25 16:45:17	1936		2	12	1	2	1	Y	3	5	1	YES	6	1	2
Public Place	1	BRUSC KUNG FU Traditionell kinesisk kampsport for den som vill ha det lilla extra! För vem? Träningen passar alla barn(*) som vuxna, tjejer som killar. Det enda som krävs är lite nyfikenhet & ett glatt humör. Vad tränar man? Under ett pass tränar vi bl.a. styrke-och konditionsträning, självförsvar, teknikövningar, vighet, akrobatik och form, sanda och balansträning, Vi tränar även med en del trad…	2016-09-22 14:20:32	1866		2	18	1	1	1	Y	3	3	1	NO	6	3	2
Public Place	1	Är du kille och går i 6an? Har du tröttnat på fotboll, hockey och innebandy eller bara vill prova något nytt? Spela handboll i GT Söder Pojkar-04 Alla är välkomna! Vi kan erbjuda ledare med över 20 års handbollserfarenhet (inkl. 10 års elithandboll) samt dedikerad Målvaktstränare! Tisdagar 19.00 i Sköndalshallen Lördagar 09.00 Gubbängshallen. Hör av er till NN ### Alternativt gå in på www.gtsoder…	2016-09-22 14:24:40	1866		2	18	1	1	1	Y	2	5	1	YES	6	2	2
Public Place	1	JUST NU FÖRSTA MÅN 0 kr* Ät dig starkare MED VIKTVÄKTARNA MAT & MOTION Ät dig starkare med ViktVäktarna. God och hälsosam mat gör inte bara att du går ner i vikt - du mår bra! Kom till ett möte så berättar vi mer. Varmt välkommen! FARSTA, FARSTA GÅRD, FARSTAÄNGSVÄGEN 22-26 Magasinet, vån 1. Mellan Farsta sim- och Farsta idrottsplats. Parkering finnes vid idrottshallen, låg avgift. Buss 185V fran …	2016-09-22 14:30:52	1866		2	3	2	1	1	Y	3	2	1	NO	4	3	2
Public Place	1	STAND UP YOURS DIN FEMINISTISKA HUMORKLUBB SÖDRA TEATERN MED SHANTHI RYDWALL MENON & PERNILLA HAMMARGREN JOSEFIN JOHANSSON KARIN ADELSKÖLD NOUR EL REFAI DJ LEBB ZEPPELIN FREDRIK APOLLO ASPLUND 4 OKTOBER PÅ SÖDRA TEATERN MED STÖD FRÅN STOCKHOLMS STAD	2016-09-22 14:37:10	1866		2	3	2	2	1	Y	3	5	1	NO	4	3	2
Public Place	2	BRUSC KUNG FU Traditionell kinesisk kampsport for den som vill ha det lilla extra! För vem? Träningen passar alla barn(*) som vuxna, tjejer som killar. Det enda som krävs är lite nyfikenhet & ett glatt humör. Vad tränar man? Under ett pass tränar vi bl.a. styrke-och konditionsträning, självförsvar, teknikövningar, vighet, akrobatik och form, sanda och balansträning, Vi tränar även med en del trad…	2016-09-22 14:39:35	1866		2	18	1	1	1	Y	3	3	1	NO	6	3	2
Public Place	1	SLÄKTFORSKNING Lördagen den 17 september kl 11-15 Fyra släktforskarföreningar inbjuder till ÖPPET HUS Kom och prova på släktforskning! Funktionärer finns på plats för att visa upp föreningarnas verksamheter och hjälpa dig komma igång med din släktforskning. Vi gästas också av Arkiv Digital som visar det senaste bland digitaliserade arkiv och databaser. GF:s arkiv, bibliotek och datorsal är tillgä…	2016-09-22 14:44:45	1866		2	12	1	1	1	Y	3	3	1	NO	4	3	2
Public Place	1	JURIDISK HJÄLP MER ÄN 20 ÅR I SÖDERORT ADVOKATBYRÅ VERKSAMHET INOM TESTAMENTS-, FAMILIJE-, ÄKTENSKAPS-; ARBETSRÄTT, ARVSFRÅGOR, BODELNING, PROCESSRÄTT MM TILL MINSTA MÖJLIGA KOSTNAD ADOLPHSSONS B I JURIDISKA BYRÅ TEL. ### Tidsbokning, fri rådgivning, hembesök	2016-09-22 14:49:17	1866		2	3	2	1	1	Y	2	3	1	NO	1	3	1
Public Place	1	itrim Itrim - mer än bara träning Med Itrim når du snabba resultat och du behåller formen, även i framtiden. Shapemedlem För dig som vill gå ner i vikt och behålla den resten av ditt liv. Här får du en personlig hälsocoach och föreläsningar där du får jobba med att hitta balansen i ditt liv med allt från kost till sömn till träning. Focusmedlem För dig som vill ta träningen till en ny nivå med hj…	2016-09-22 15:02:33	1866		2	18	2	1	1	Y	2	2	1	NO	6	1	2
Public Place	1	OLLES SERVICEBIL Repar på plats båtar, snöskotrar, slungor etc. ### Jag servar och reparerar din utombordsmotor, snöslunga och båt på plats med servicebil.Snöskotrar, släpvagnar och liknande produkter får du komma till min verkstad med.Om du ej har tid kan jag hämta och köra tillbaka. *du slipper spännande transporter med båtvagn 1 "20km" till en överbokad marina *Du slipper hyra vagn och ta ledi…	2016-09-22 15:34:46	1852		2	3	2	2	1	Y	2	3	1	YES	6	3	1
School	1	Vid frånvaroanmälan för exempelvis tandläkarbesök den 28 september kl. 8.00-10.00: 1. Ring ### 2. Knappa in ditt barns personnummer 3. Ange datum för frånvaro(ex. 28 september) 4. Ange klockslag för när frånvaron börjar. (ex. kl.8.00) 5. Ange datum för frånvaron slut. (ex. 28 september) 6. Ange klockslag för när frånvaron slutar. (ex. kl 10.00)	2016-09-22 19:19:21	1883		1	24	8	1	1	Y	2	1	1	NO	1	1	1
School	1	Ansökan hämtar du hos kuratorn Ansökan om extra tillägg Läsåret 2016/17 Bra att veta om extra tillägg Vad krävs? Extra tillägg är ett bidrag du kan söka om du och din familj behöver mer pengar än studiebidraget. För att kunna få extra tillägg måste du uppfylla ett antal krav. Om du är utländsk medborgare gäller dessutom särskilda villkor. Läs mer på www.csn.se Godkänd utbildning Du kan få extra t…	2016-09-22 19:50:17	1883		1	24	8	1	1	Y	2	5	1	YES	6	1	2
School	1	TJEJJOUREN I MALMÖ Du & Jag mot Världen Baby Stödkontakt Tel: ### MSN: @@@ Mail: @@@ www.tjejjourenimalmo. se Tjejjouren i Malmö	2016-09-22 19:53:44	1883		1	24	1	2	1	Y	3	3	1	YES	6	1	2
School	1	Vem bestämmer över ditt liv? Får du själv välja fritidsaktiviteter, vänner eller partner? Kontrolleras och begränsas du av din familj? Blir du hotad eller slagen? Vad händer om du går din egen väg? Hos oss på Kriscentrum Boende Heder finns det ALLTID någon att prata med. Hör gärna av dig! ### @@@ malmo.se/hedersvald S:T PETRI SKOLA Malmö Stad	2016-09-22 19:57:31	1883		1	24	4	1	1	Y	3	3	1	YES	6	1	2
Public Place	1	DEN NAKNE MANNEN OCH MANNEN I frack PREMIÄR 24 SEPTEMBER SPELAS 1, 2, 7, 8, 15 OKTOBER KL. 19.00 ORMTEATERN.SE	2016-09-22 20:54:05	1866		2	3	2	2	1	Y	3	3	1	YES	2	3	2
Supermarket	1	Rapportera din rovdjursobservation redan från första snön! Varje vinter kartläggs länets lodjur, järvar och vargar. Syftet är bl a att åstadkomma ett bra underlag för förvaltningen av dessa arter. Det som kartläggs är: Lodjur, endastfamiljegrupper (flera djur tillsammans) järv och varg samtliga observationer. Ser du spår eller observerar rovdjur av dessa kategorier, rapportera detta genast till k…	2016-09-23 05:02:19	1904		1	24	1	1	1	Y	2	1	1	NO	1	1	1
Library	1	HELENA SANDKLEFF PRODUKTION PRESENTERAR SORAN ISMAIL & MAGNUS BETNÉR EN SKAM FÖR SVERIGE 2 MALMÖ LIVE MALMÖ 4 NOVEMBER 19:30 INFO & BILJETTER : WWW.ENSKAM.SE	2016-09-23 06:40:41	1883		1	3	2	2	1	Y	3	2	1	YES	2	1	2
School	1	EUROPEAN CENTRE FOR MODERN LANGUAGES CONSEIL DE L’EUROPE CENTRE EUROPEEN POUR LES LANGUES VIVANTES COUNCIL OF EUROPE Celebrate the European Day of Languages What is the European Day of Languages (EDL)? A day to encourage language learning across Europe. At the initiative of the Council of Europe, Strasbourg, the European Day of Languages has been celebrated every year since 2001 on 26 September. …	2016-09-23 06:44:58	1883		1	14	3	2	3	Y	3	3	1	YES	6	1	2
Library	1	En unik utställning ARACHÆOMUSICA MUSIK – så började det! Klostret i Ystad 6 juni 2016–8 jan 2017 www.ystad.se/klostret	2016-09-23 06:45:53	1883		1	24	4	2	1	Y	3	3	1	YES	6	1	2
Library	1	20:00 BABEL • BILJETTER : OSLIPAT.COM Tomie Roos Målningar 1973/2016 18 September/ 6 November Regionmuseet Kristianstad	2016-09-23 06:48:33	1883		1	24	5	2	1	Y	3	3	1	NO	4	1	2
Public Place	1	SE HIT! Är Du intresserad av att jobba som personlig assistent till en kvinna i 30 års åldern? Är Du rökfri och djurfri? Är Du kvinna på 30 plus? Är Du beredd på att jobba ett eller två dygnspass i veckan? Då är Du den vi söker! Maila ditt CV med ett personlig brev till @@@ eller ring NN på ### vardagar 17:00 - 22:00, helger 10:00 - 22:00 så förklarar vi mer.	2016-09-23 06:57:08	1883		1	3	7	1	1	Y	2	1	1	NO	6	1	2
School	1	Vägmärken QUIZ Lär dig alla vägmärken snabbt och lätt! Smarta frågor Alla vägmärken Detaljerad information Jag heter Oscar, är 20 år och tog studenten förra året. När jag skulle ta körkortet i oktober saknade jag ett effektivt sätt att lära mig vägmärken på. Därför byggde jag appen som jag det lättare för kommande körkortstagare! Du hittar den genom att söka på "Vägmärken Quiz" i App Store. Appen…	2016-09-23 07:03:23	1883		1	3	7	1	1	Y	2	5	1	NO	3	1	2
School	1	NORDIC INVASION DEN OFFICIELLA STUDENTRESAN 2017 STÖRST PÅ UNGDOMSRESOR AYIA NAPA - MAGALUF - RHODOS WWW.NORDICINVASION.SE För info kontakta NN SA14B	2016-09-23 07:05:27	1883	1	1	3	2	2	1	Y	3	2	1	YES	6	1	2
Library	1	Fotovernissage Odd Jade Fredag 23 september kl. 18.00-21.00 på galleri i Underverket, Hasselgatan 8 "Every now and then, she tried to be normal, but she failed miserably each time. Instead she went back into being herself. Odd. Odd Jade." UNDERVERKET ABF	2016-09-23 07:05:56	1883		1	24	1	1	3	Y	3	2	1	NO	4	1	2
Library	1	flyktsoda GALLERINATT PÅ FONTÄNHUSET 24 SEPTEMBER 2016, 18:00 - 23:00 ENGELBREKTSGATAN 14 MALMÖ	2016-09-23 07:08:31	1883		1	24	2	1	1	Y	3	3	1	NO	4	1	2
Library	1	Åter SKAPA kreativt åkerbruk Bygg och skapa fritt med nya spännande material! VÄLKOMMEN PÅ DROP-IN-ART Söndagar 2016: 18/9, 16/10, 13/11 och 11/12, kl 12-16 www.atarskaparnamalmo.se Du hittar oss på STPLN, Stapelbäddsgatan 3, i Västra hamnen	2016-09-23 07:11:45	1883		1	24	4	2	1	Y	3	5	1	YES	2	1	2
Library	1	CINEMA POLITICA MALMÖ PRESENTS: A PEOPLE UNCOUNTED WEDNESDAY SEPT 21 7 PM THIS DOCUMENTARY SHEDS LIGHT ON THE UNIQUE CULTURE OF THE ROMANI PEOPLE WITHIN THE LARGER CONTEXT OF THE WORLD´S LEGACY OF RACISM AND GENOCIDE ADDRESS: GARAGET LÖNNGATAN 30 *FREE FIKA *FREE ENTRANCE *DONATIONS APPRECIATED WWW.CINEMAPOLITICA.ORG/MALMO CINEMA POLITICA SCREENING TRUTH TO POWER	2016-09-23 07:18:29	1883		1	24	1	1	3	Y	3	5	1	YES	2	1	2
Library	1	LOUIS MITCHELL MUSIC PRESENTERAR LES HARICOTS ROUGES GUNHILD CARLING BAND JUMP 4JOY JAZZPARTY Lör 24/9 kl 19.00 Medborgarhuset Eslöv Biljetter: 350 kr. Förköp: www.nortic.se Biljettbyrån Lund och Kulturcentralen Malmö.	2016-09-23 07:21:57	1883		1	3	2	2	1	Y	3	5	1	YES	2	1	2
School	1	study abroad Vill du studera utomlands? UTLANDSSTUDIEMÄSSA NÄR: TORSDAG 22 SEPTEMBER, kl 13-18 VAR: MALMÖ BÖRSHUS (vid Centralstationen, Malmö) Välkommen till Sveriges största mässa om utlandsstudier. Träffa College och Universitet från stora delar av världen. Spana in vilka som deltar på mässan och förregistera dig redan nu på studyabroad.se FRI ENTRÉ Ta med en kompis!	2016-09-23 07:29:06	1883	1	1	24	2	2	1	Y	3	2	1	YES	6	1	2
Library	1	RödaKorset Malmökretsen av Svenska Röda Korset SPRÅKHÖRNAN SVENSKA Tala svenska! Onsdagen den 21 september! 17.00 – 18.30 i Gullbergsrummet! Därefter onsdagar kl. 17.00-18.30 i Gullbergsrummet. OBS! Tid och plats kan någon gång ändras!	2016-09-23 07:56:18	1883		1	16	1	1	1	Y	2	1	1	NO	5	1	2
School	1	ÖPPETTIDER HT 2016 YTTERBY FRITIDSGÅRD Tisdagar kl 17-20.45 från 7:an till 18 år Fredagar kl 18-23 från 7:an till 18 år SUPER EPIC WEEKEND! v.37, v.40 och v.43 med öppet på Lördag 18-23 och Söndag 16-21. Fritidsgården ligger i Ytterbyskolan, ingång från skolgården Tel dagtid:### kvällstid: ### Gilla vår sida på facebook "Ytterby fritidsgård" VÄLKOMMEN! KUNGÄLVS KOMMUN	2016-09-23 08:56:41	1896		1	20	4	2	1	Y	3	1	1	NO	1	4	2
Library	1	HBTQ-bokcirkel på Kungälvs bibliotek, Mimers Kulturhus Hitta dig själv och dina erfarenheter i litteraturen - var med i Kungälvs läsecirkel med HBTQ-litteratur! Vi fikar snackar om böcker och annan queer kultur. Öppet för alla som är homo, bi, trans, queer, fundersamma eller nyfikna. Tid: Tisdagar kl 17.30, 13/9, 11/10, 8/11, 29/11 Plats: Kungälvs bibliotek, Mimers Kulturhus Anmälan görs på bibli…	2016-09-23 09:16:52	1896		1	15	1	1	1	Y	3	4	1	NO	6	1	2
Public Place	1	YTTERBY IS DAMER vs. UTBYNÄS SK 25/9 KL. 14.15 HERRAR vs. AHLAFORS IF 24/9 KL. 14.00 VÄLKOMNA TILL YTTERN TRYCK COMPANIET	2016-09-23 09:19:51	1896		2	18	1	2	1	Y	3	2	1	NO	5	3	2
Public Place	1	Hökis Visrum Cosmetisk Heesvijk: "Duon Cosmetics Heesvijk består av NN och NN. De gör säregna tolkningar av Cornelis låtar och dikter med ett sound som täcker allt mellan rå blues och folkmusik till drömska ljudlandskap. Med en förhoppning att göra traditionen aktuell för idag och förena generationer tar de sig stora musikaliska friheter och är alltid en kosmisk upplevelse att bevittna live." Den…	2016-09-23 09:31:12	1866		2	20	1	2	1	Y	2	2	1	YES	6	3	2
Public Place	2	YTTERBY IS DAMER vs. UTBYNÄS SK 25/9 KL. 14.15 HERRAR vs. AHLAFORS IF 24/9 KL. 14.00 VÄLKOMNA TILL YTTERN TRYCK COMPANIET	2016-09-23 09:40:55	1896		2	18	1	2	1	Y	3	2	1	NO	5	3	2
Public Place	1	Skarpnäcks Kulturhus Loppis Söndag 25 september kl. 12.00 - 15.00 Passa på att komma och fynda av alla fina saker! V kör den sista söndagen i månaden på Skarpnäcks Kulturhus till november. Vill du sälja? - så här bokar du bord: Maila @@@ senast 23 september. Skriv "Loppis" i ämnesraden. I mailet skriver du: • Antal bord du vill boka (ett eller två). • Ditt namn, fullständigt personnummer och adre…	2016-09-23 09:56:27	1866		2	2	1	2	1	Y	3	1	1	YES	6	3	2
Public Place	1	Skarpnäcks Kulturhus Workshop – porträtt och studio Vi lär oss om ljus, komposition och studioljus. På denna workshop övar vi och planerar, för att senare under en helg ha en drop-in studio. Där får du möjligheten att fotografera dina vänner och familj. Inga förkunskaper eller utrustning krävs. Föranmäl dig till @@@ eller prata med oss i receptionen. Fri entré. Tisdagar 13 och 27 september kl. 17…	2016-09-23 18:30:03	1866		2	12	1	1	1	Y	3	2	1	YES	6	3	2
Public Place	1	Skarpnäcks Kulturhus I samarbete med Skarpnäcks Kulturhus KULTURRÅDET Trajosko Rättigheter med stil -Romsk modeshow Lördag 22 oktober kl. 18.00 Välkommen till en fräck och banbrytande modevisning med traditionella romska kvinnokläder i ny design från olika grupper. Romska kvinnoorganisationen Trajosko Drom bjuder på rättighetsbudskap varvat med artister, mat och mingel. Artister: NN, NN, NN, NN o…	2016-09-26 07:55:37	1866		2	20	1	1	1	Y	3	2	1	YES	6	3	2
Public Place	1	Stockholms stad Päiva soumen- kielsten omaisille Vieraana Arja Saijonmaa Tervetuloa kaikki te, joilla on ikääntynyt suomenkieleinen läheinen. Koko päivä tulka-taan ruotsiksi ja suomeski. • Suomenkielsten oikeudet. • Mitä tukea omainen voi saada? Päivä: Torstai 6, lokakutaa 13.00-16.00. Arja saijonmaa – pohdintaa suomalaisesta identiteetistä. Paikka: Tellus fritidscenter, Lignagatan 8. Lisätletoja…	2016-09-26 10:01:27	1866		2	20	1	1	2	Y	3	2	1	YES	6	3	2
Supermarket	1	Betaniakyrkan ENVIKEN Boka lördag 26 nov kl. 18:00 för konsert med NN (piano & sång) & NN (sång). De framför eget material samt advent- och julsånger. Bilda	2016-09-23 12:00:36	1903		2	20	1	2	1	Y	2	2	1	NO	5	3	2
Supermarket	1	Boxplats finns från 1 september i litet stall nära Svärdsjö Ridklubb Intresserad? Ring ###	2016-09-30 07:13:26	1903		2	24	7	2	1	Y	2	1	1	NO	1	3	1
Supermarket	1	VETERANMASKINSDAG LÖRDAGEN 24/9 KL: 10:00 – 16:00 PÅ BONDSÅGEN LINGHED GRÄVMASKINER, BANDSCHAKTARE, VETERANTRAKTORER OCH SKOGSMASKINER. TIMMERSÅGNING MED VETERAN-RAMSÅG VISAS. SERVERING KOMMER ATT FINNAS PÅ OMRÅDET. VÄL MÖTT FÖR EN BRA DAG. SVÄRDSJÖ MASKINVETERANER NN ###	2016-09-30 07:38:21	1903		2	20	1	2	1	Y	2	2	1	NO	1	3	2
Supermarket	1	DALA TEATERN DEN ITUSÅGADE DAMEN Premiär 10 sept - spelar t.o.m 15 okt i Falun ### | www.dalateatern.se | Visit Södra Dalarna	2016-09-30 07:47:44	1903		2	20	2	2	1	Y	3	2	1	YES	6	3	2
Supermarket	1	KÄLLÄNGEN FOTBOLL Herrar div. 5 SÖNDAG 25/9 KLOCKAN 15 00 SVÄRDSJÖ IF SMEDJEBACKENS FKA Café VÄLKOMNA!	2016-09-30 07:58:39	1903		2	18	1	2	1	Y	4	3	1	NO	5	1	2
Supermarket	1	Valpar PAPPA Puff och mamma tax söker nu egna hem till sina barn 2 killar 2 tjejer Lev klara vecka 40 då bes vac chipmärkta . Pris 5.500 vid tingand av valp betalas handpenning 1.000 båda föräldrar djuren finns att se i hemmet Vid intresse ring. ###	2016-09-30 08:00:07	1903		2	2	7	1	1	Y	1	1	1	NO	1	1	2
Supermarket	1	BENGTHEDENS BYGDEGÅRD Barnloppis I Bengtshedens bygdegård Lördag 24/9 kl 9:30-12:30 Fika finns till försäljning Är du intresserad av att sälja något denna dag så sker inlämning fredag 23/9 kl 1730-1930. Mer information får du när du kontaktar NN på telefon ### 10% av försäljningen går till Bengtshedens bygdegård och 10% kommer att gå till barncancerfonden Betalning sker kontant eller via swish. V…	2016-09-30 08:11:55	1903		2	24	1	2	1	Y	2	5	1	YES	6	3	2
Supermarket	1	YTTERGÅRD´S HUNDDAGIS & PENSIONAT Ett litet mysigt hunddagis och pensionat i Arnbo, Svärdsjö där hundarna vistas med familjen i bostaden. Jag som driver verksamheten heter NN och har en treåring gymnstutbildning mot djur, inriktning hund med stor erfarenhet av hundpassnig och hundagis. Mina tjänster: • Hundagis även med drop in i mån av plats • Hundpensionat • Kloklippning • Tovutredning • mm. Fö…	2016-09-30 08:12:27	1903		2	3	2	1	1	Y	2	4	1	NO	6	3	2
Supermarket	1	15 meters arbetshöjd, teleskopiskt utskjut på bommen roterbar korg, hydrauliska stödben och drivning på hjulen drivs med med 230v/batteri NN ### NN ###	2016-09-30 08:25:27	1903		2	6	1	2	1	Y	2	2	1	NO	1	1	2
Public Place	1	Vi, Bygghantverkarna Jakub och far AB ..har utfört nyligen byggtjänst i denna område och återigen lämnat en nöjd kund efter sig. Bli med på vår referenslista och få dina projekt klara med rätt pris och kvalitee. Vi bygger i Dalarna sedan 2005. Vi utför: - snickeri, tillbyggnader, takarbete - måleri, fasad och fönsterrenovering måleri invändigt - rödfärgning - mur och putsarbete Mvh NN ###	2016-09-23 12:08:22	1903		2	3	2	1	1	Y	2	1	1	NO	1	4	1
Public Place	1	KRÅKAN KULTUR & TEATER – på gång hösten 2016! Måndag 29 augusti startar vi teaterprojektet "Folk och rövare i Kamomilla stad" tillsammans med Enviken Kultur och Teater (EKOT). Kom till Envikens sockenstuga kl 18.30 om du vill vara med! Gäller både barn från 9 år tillsammans med förälder och vuxna. Repetitioner måndagkvällar, planerad premiär i mars 2017, fyra föreställningar i bygden. Fredag 2 se…	2016-09-26 10:19:14	1897		2	20	1	2	1	Y	2	3	1	NO	3	3	2
Public Place	1	Sivananda Hatha Yoga Yogahuset Falun, Garvareg.7 Forts mån 18.30 – 20.00 14ggr 1500kr Nyb mån 20.15 – 21.30 7ggr 900kr start 22.8. Drop-in fre 12.00 – 13.00 Drop-in 160kr Svärdsjö Borgärdesvägen Forts tis 19.00 – 20.30 Start 23.8 Forts fre 17 - 18.30 14ggr 1300kr Start 26. 8. Drop-in 150kr ABF Falun, Trotzg. 47 Yoga 60+ tis 12.30 – 14.00 5ggr 300kr Start 30.8. Yoga på stol fre 10.30 – 11.30 10ggr…	2016-09-26 10:56:42	1897		2	3	2	1	1	Y	2	2	1	YES	6	3	1
Public Place	1	STUGA ÖNSKAS HYRA ELLER ARRENDERAS I SVÄRDSJÖ ÖNSKEMÅL: VATTEN, AVLOPP OCH EL. GÄRNA NÄRHET TILL SJÖ! AV SKÖTSAMT ÄLDRE PAR (PENSIONÄRER). TELEFON NR: ### EL. ### NN, SANDVIKEN	2016-09-26 11:09:11	1897		2	5	7	1	1	Y	2	3	1	NO	1	3	2
Public Place	1	Sundborns GoIF fotboll-innebandy-gymnastik-skidor Strax dags för innebandysäsong I Sundborn finns det innebandy för både tjejer och killar i alla åldrar. För de yngre åldrarna kommer dessa grupper och tider att gälla: Flickor födda 2007 / 2008 Träningstider: Tisdagar 17.15-18.30 Terminsstart: 27 september Kontakt: NN: @@@ alt ### Flickor födda 2005 / 2006 Träningstider: Måndagar 19.20-20.30 samt …	2016-09-26 13:28:57	1897		2	20	1	1	1	N	2	1	1	YES	6	1	2
Public Place	1	Behöver Ni hjälp? Vi hjälper Er med det mesta! Några exempel på våra tjänster. Trädgårdsarbete Markanläggning Trädfällning Transporter t.ex. till soptippen Flytt Takreparationer Snickeri Målning inne och ute Grovstädning Snöröjning Kontakta oss för mer info och priser Svartnäsgården ####-#####	2016-09-26 13:31:51	1897		2	3	2	1	1	Y	2	5	1	NO	1	3	2
Public Place	2	DALA TEATERN DEN ITUSÅGADE DAMEN Premiär 10 sept - spelar t.o.m 15 okt i Falun ### | www.dalateatern.se | Visit Södra Dalarna	2016-09-26 13:37:48	1897		2	20	2	1	1	Y	3	2	1	YES	6	4	2
Public Place	1	KRÅKANKULTUR & TEATER PRESENTERAR BL A ‘GREAT BALLS OF FIRE’ & ‘WHOLE LOTTA SHAKIN´’ MED LINDA GAIL LEWIS FREDAGEN DEN 18 NOVEMBER 19.00 HEDENBORG, SVÄRDSJÖ BILJETTER 195 KR EXKL SERVICEAVGIFT KÖP I TID - BEGRÄNSAT ANTAL PLATSER FÖRKÖP: TURISTBYRÅERNA ###-######, WWW.VISITDALARNA.SE OCH GOTTBODEN I BORGÄRDET Gratis servering under pausen! Folkuniversitetet Kursverksamheten vid Uppsala universitet…	2016-09-26 13:39:56	1897		2	20	2	1	1	Y	3	2	1	YES	6	3	2
Public Place	1	YOGA Zandra LÄTTYOGA Bengtshedens Bygdegård START 13 september kl. 10.00 Mycket lugnande och läkande yoga som hjälper dig utveckla styrka, rörlighet och inre lugn. 90 minuters klasser med 20 min helande guidad meditation på slutet. TA MED DIG EGEN YOGAMATTA! PRISER: Klippkort 10 gånger 850 kr Drop-in klass 100 kronor per gång. Mer information och anmälan NN, dipl. Bioenergiterapeut. Yoga instrukt…	2016-09-26 13:41:10	1897		2	3	2	1	1	Y	2	3	1	YES	6	3	2
Public Place	1	Träna med oss i Svärdsjö 2016 Friskis & Svettis Vecka 36–49 Torsdag kl 19–20 Jympa medel NN/NN Söndag kl 19–20 Jympa Puls bas NN Kortpriser: Vux termin: …...500 kr Ungdom/pensionär termin 300 kr Medlemskap tillkommer 150 kr/år (Köp helst via nätet eller i Falun) Träningskortet finns att köpa via hemsidan Du med Svärdsjö-kort kan träna på följande pass i Falun: lunchpass måndag-fredag och lördag k…	2016-09-26 13:42:28	1897		2	3	2	1	1	Y	3	2	1	NO	5	1	2
Public Place	1	SVARTNÄSGÅRDENS AVHÄMTNINGSMENY Ska ni ha fest, bröllop, konferens? Vi hjälper er med maten! Några förslag: Smörgåstårta Välj mellan Skagen eller Skinkfyllning 8 - 10 bitar 449 :- 16 - 18 bitar 895 :- Lyxig räksmörgås Ost/skinkfralla Fylld baguette välj mellan tonfisk, kyckling eller skinkröra Tacobuffé Varmrätter: Kycklingfilé, Fläskfilé Välj tillbehör: Potatisgratäng, kulpotatis, rostad klyftpo…	2016-09-26 13:44:34	1897		2	3	2	1	1	Y	2	2	1	NO	6	3	2
Public Place	1	falun.se/ Gemenskap och aktiviteter på Faluns träffpunkter Umgås, fika, skratta, sticka, snickra eller träna tillsammans. För dig som är pensionär finns aktiviteter av alla slag på på Faluns olika träffpunkter. Träffpunkt Britsarvet, Tegelvägen Falun Träffpunkt Hosjögården, Centralvägen Hosjö Träffpunkt Sandtäktsgården, Bjursåsvägen Bjursås Träffpunkt Smedjan, Sturegatan Falun Träffpunkt Svärdsjö…	2016-09-26 13:46:54	1897		2	20	4	1	1	Y	3	2	1	YES	6	1	2
Public Place	1	Känner du kommunfixaren? Du som är över 67 år, kan få gratis hjälp av kommunfixaren med praktiska småjobb. Behöver du till exempel byta lampor, lysrör eller gardiner? Fästa upp sladdar? Halkskydda mattor, smörja lås eller sätta upp brandvarnare? Boka kommunfixaren redan idag! Kommunfixarens tjänster är gratis, men du behöver inte själv hålla med allt material. Uppdraget får högst ta en timme. Kon…	2016-09-26 13:49:17	1897		2	24	4	1	1	Y	3	2	1	YES	6	1	2
Supermarket	1	Lägenhetsbyte! Vi har en fin renoverad 3a på 86 kvm, med stor inglasad balkong på andra våningen. Hyra 8850kr. Vid mer info Ring. Önskas byta till en 4a eller en 3a med uteplats. Mvh NN och NN NN-### NN-###	2016-09-23 13:22:19	1866		2	5	7	1	1	Y	2	1	1	NO	1	2	1
Public Place	1	NYÖPPNAD Indisk restaurang Curry King ...indisk restaurang Ringvägen 6, Västerhaninge Tel. ### SERVERING • AVHÄMNTNINGSMENY DAGENS LUNCH 1000-1430 Från 79:- inkl. Dryck, sallad och kaffe ÖPPETTIDER Mån-Tisdag 10.00-21.00 Onsdag-Torsdag 10.00-22.00 Fredagar 10.00-24.00 Lördag 11.00-24.00 Söndag 11.00-22.00 Välkommen	2016-09-23 13:22:21	1866		2	3	2	2	1	Y	3	3	1	NO	6	3	2
Public Place	1	Hyresgästföreningen Öppet Hus Tisdag 10 maj kl. 15.00 – 18.00 Tisdag 7 juni kl. 15.00 – 18.00 Tisdag 23 augusti kl. 15.00 – 18.00 Tisdag 13 september kl. 15.00 – 18.00 Tisdag 11 oktober kl. 15.00 – 18.00 Tisdag 08 november kl. 15.00 – 18.00 Tisdag 06 dec kl. 15.00 – 18.00 (med luciafika) Vi finns på Poseidons torg 4 i Handen På plats kommer verksamhetsutvecklare, assistent och förtroendevalda fin…	2016-09-23 13:26:44	1866		2	20	1	1	1	Y	2	1	1	NO	6	3	1
Public Place	1	HANINGE KULTUR LÄXHJÄLP MED RÖDA KORSET Tid: Varje onsdag, kl.15.30 – 18.00 Från 7 september till 7 december 2016 obs! uppehåll den 2 nov. Plats: Biblioteket i Västerhaninge Ålder: grundskoleelever, vuxna elever i Sfi och svenska som andraspråk Ingen föranmälan. Kostnadsfritt För information ### eller ### ARR: RÖDA KORSET I SAMARBETE MED BIBLIOTEKET I VÄSTERHANINGE Bibliotek.haninge.se Haninge ko…	2016-09-23 13:26:45	1866		2	20	1	1	1	Y	3	3	1	NO	6	3	2
Public Place	1	Gammaldanskurs för nybörjare och osäkra Tid: Måndagar kl.18.30—20.00 Start 19 september 2016 Plats: Söderringssalen, Enskede gård T Pris: 350 kr, 6 gånger ALLTID LEVANDE MUSIK Anm: NN: ### NN: ### NN: ### @@@ Föreningen Söderringen www. soderringen.se KULTURENS bildningsverksamhet Ungdomsrabatt upp till 25 år	2016-09-23 13:27:10	1866		2	20	1	2	1	Y	2	3	1	YES	6	3	1
Public Place	1	HÖSTMARKNAD lördag 10 september kl 11 – 15 i Tungelsta trädgårdspark (bakom Konsum) Hantverk m.m. i växthuset Kafé i torkladan NN signerar sin senaste och sista bok i torklandan Folk & Trädgård i Tungelsta Handlaget i stationshuset har höstmarknad samtidigt Välkomna!	2016-09-23 13:31:01	1866		2	20	1	2	1	Y	2	5	1	NO	5	4	2
Public Place	1	GYMNASTIK Haninge Gymnastikförening Välkommen till höstterminen 2016 Basgympa Ribby Sporthall, Lilla salen 1 tr. ner Måndagar 16.00 - 17.00. Start 5 september Ledare: NN Medelgympa bl.a styrketräning med hantlar Ribby Sporthall, Lilla salen 1 tr. ner Onsdagar: 19.00 - 20.00. Start 7 september Ledare: NN Vik. ledare, båda grupperna: NN Upplysningar: NN ### NN ### NN ### Ingen föranmälan. Terminsav…	2016-09-23 13:31:18	1866		2	20	1	1	1	Y	2	1	1	NO	1	3	1
Public Place	1	HUNDMORSAN BEHÖVER DU HJÄLP MED ATT RASTA DIN HUND ? STRESSAR DU HEM PÅ LUNCHEN FÖR ATT HINNA RASTA, ÄR DET BÖKIGT MED LÄMNINGAR/HÄMNTINGAR PÅ HUNDDAGIS ELLER KANSKE ÄR DET SÅ ATT DIN HUND INTE TRIVS I HUNDDAGIS MILJÖN.......... JAG KAN HJÄLPA DIG ! JAG KOMMER HEM TILL DIG OCH HÄMTAR DIN HUND FÖR ATT SEN, PROMENERA TILLSAMMANS MED MAX 5 HUNDAR ÅT GÅNGEN, ÄVEN ENSKILDA PROMENADER KAN ERBJUDAS I MÅ…	2016-09-23 13:33:09	1866		2	3	1	1	1	Y	2	1	1	NO	1	3	2
Public Place	1	Dalarös Eviga AB Vi gör rent hus! HEMSTÄD FÖRETAGSSTÄD FÖNSTERPUTS Tel: ### www.dalaroseviga.se | @@@	2016-09-23 13:34:41	1866		2	3	2	1	1	Y	3	1	1	YES	6	3	2
Public Place	1	Föreningen Folk & Trädgård i Tungelsta VÅRMARKNAD lördag 21 maj kl 11 – 15 i Tungelsta trädgårdspark (bakom Konsum) Plantförsäljning m.m. i växthuset Allmänna trädgårdstips Kafé i torkladan Folk & Trädgårdsmuseet är öppet Handlaget i stationshuset har öppet med hantverk, brödförsäljning och loppis Välkomna!	2016-09-23 13:37:33	1866		2	20	1	2	1	Y	2	5	1	NO	5	3	2
Public Place	1	TRIO SMACK En trickbaserad clownföreställning med Dotterbolaget. Väskor som fastnar i luften, röda bollar som försvinner och återuppstår, hisnande jonglering, en ilsken enhjulningscyklist och en tom påse. En clowntrio jobbar på fullaste allvar med att roa publiken. De bjuder på en fysisk föreställning med jonglering, enhjulningsnummer och clowneri. Föreställningen gjordes ursprungligen för att sp…	2016-09-23 13:38:22	1866		2	20	8	2	1	Y	2	2	1	NO	1	3	2
Public Place	1	"KOM TILL MIG, ALLA NI SOM ÄR TYNGDA AV BÖRDOR: JAG SKALL SKÄNKA ER VILA." MT 11.28 DU ÄR INBJUDEN TILL ETT MÖTE SOM KAN FÖRÄNDRA DITT LIV. LÅT DIG ÖVERRASKAS AV JESUS KRISTUS. VÄLKOMMEN! Katekeser för vuxna och ungdomar. Fr.o.m. 15 september, tisdagar och torsdagar kl 19.00. Familjens katolska församling	2016-09-23 13:42:17	1866		2	17	1	1	1	Y	2	2	1	NO	4	3	2
Public Place	1	SÖNDAG 16 OKTOBER RUDANS FRILUFTSGÅRD HANINGE TRAIL 2016 ETT RIKTIGT TERÄNGSLOPP I HANINGES SKOGAR! Trött på asfalt och välluktande elljusspår? Då är detta något för dig! I Rudans underbara skog kan du välja på 3 banlängder. 5 KM: Skogsmiljö med backar. 10 KM: Blandat underlag i skogsmiljö. Backar finns! 16,7 KM: Gamla kultförklarade skid-SM-banan från 1990. Innehåller alla typer av underlag utom…	2016-09-23 13:43:38	1866		2	18	1	1	1	Y	3	2	1	YES	2	3	2
Public Place	1	NN & NN TED GÄRDESTAD - en berättelse om sångerna och livet "Härlig kväll" "Bravur" "Ovationer" - Mariestads tidningen april 07 "Gärdestad-låtar blandades denna kväll ihop till en hälsokur för själen" "på ett intimt och personligt sätt" "både fantastiska och tankeväckande" - MBH LT FOLKAN TEATER Örnsköldsviks Riksteaterförening 26 november kl.19:00 Biljetter säljs på ticketmaster.se o turistbyrån…	2016-09-23 15:13:38	1852		1	20	1	2	1	Y	3	2	1	YES	6		2
Public Place	2	HUMAN RESURS HUMANRESURS inbjuder till kostföreläsning Torsdagen den 20/10 har vi glädjen att kunna erbjuda en föreläsning med NN som arbetar som näringsfysiolog, författare och föreläsare. Hon kommer då att föreläsa om kostens betydelse vid övervikt och diabetes. NN har skrivit flera böcker bl.a "Diabetes, du kan själv påverka" NN medverkar i TV och i hälsotidningen Topphälsa som kostexpert. Pla…	2016-09-23 15:15:15	1852		1	12	2	1	1	Y	3	2	1	NO	5	4	2
Public Place	1	EN-certifierade minireningsverket BioCleaner EVERGREEN SOLUTIONS avloppsvattenrening från 1 hushåll och uppåt återförsäljare / entreprenör: Martin's Traktor & Gräv ### Rydman Entr. AB ### Certifierad för enskilda avlopp mer information på: www.egreen.se	2016-09-23 16:22:51	1852		2	2	2	1	1	Y	3	2	1	YES	6	3	2
Public Place	1	GET READY TO ROCK! 60-TALS ROCKKVÄLL TILL ZIGHT OCH SOB Lördag 22 oktober kl 19.30-23.00 Kulturhuset Fregatten Entré 50 kr, biljetter endast vid dörren. Arrangör: Bygdegillet Stenungsund	2016-09-24 18:19:08	1934		2	20	1	2	1	Y	3	2	1	NO	4	3	2
Public Place	1	HOCKEY Björkängshallen HUDDINGE – WINGS HC Söndag 2 okt. kl. 16:00 Hockeyettan Östra Köp din biljett på förköp – billigare än på matchdagen! huddingehockey.com Lännasport TRAVELLER BUSS AB	2016-09-25 14:09:20	1866		2	18	2	2	1	Y	3	2	1	YES	2	4	2
Public Place	1	VI KAN... JA? JA! INFLYTANDE JÄMLIKHET DELAKTIGHET TILLSAMMANS... UTAN DIG, INGEN DEMOKRATI! KOM OCH VAR MED! Hjälp till att fylla årets demokratidagar med ett spännande innehåll! Anmäl din aktivitet senast 26 augusti! HUDDINGE DEMOKRATIDAGAR 10–14 oktober 2016 Läs mer på huddinge.se/demokrati PS! Alla får vara med!	2016-09-25 14:18:43	1866		2	20	4	1	1	Y	3	1	1	YES	2	4	2
Public Place	1	SPRÅKFIKA Öva svenska? Träffa nya människor? Kom på språkfika! Nu finns det språkfika på Vårby gårds bibliotek. När? Varannan torsdag: 17.00-18.45 Torsdagarna: 29 september, 13 oktober, 27 oktober, 10 november, 24 november och 8 december. Var? Vårby allé 26, Vårby gård. Välkommen! Barn är också välkomna och lokalen är tillgänglig för rullstol. IM INDIVIDUELL MÄNNISKOHJÄLP SWEDISH DEVELOPMENT PART…	2016-09-25 14:33:22	1866		2	16	1	2	1	Y	2	1	1	NO	4	4	2
Public Place	1	Konstnärsträff med NN "Att få arbeta med skulptur - (ett privilegium) har för mig blivit en process att förstå och bearbeta tillvaron. En verklighet som är stadd i stora konfliktsskapande förändringar." Onsdag, 28 september kl. 18.30 Galleri Lyktan Skogås centrum 20 minuter från Stockholms central pendeltåg linje 35 till station Skogås. Från Huddinge buss 742, från Farsta buss 828, 830 och 831 ti…	2016-09-25 14:35:04	1866		2	20	2	2	1	Y	3	3	1	YES	6	4	1
Public Place	1	Vårby bibliotek med Barnkonsten Torsdag 6 oktober, kl 18.00 "När revolutionen kom till Vårby Gård": NN Författaren NN besöker Vårby bibliotek för att prata om sin nya bok: berättelsen om en forntida vårdkaseby som på 1970-talet blev en Stockholmsförort Varmt välkomna! Fri entré, ingen föranmälan. BIBLI OTEK HUDDINGE Vårby bibliotek med Barnkonsten– en del av Bibliotek Huddige bibliotek.huddinge.s…	2016-09-25 14:10:00	1866		2	12	1	1	1	Y	3	2	1	YES	2	4	2
Public Place	1	KOM MED OCH SJUNG! START ONSDAG 31 AUG Södertörn Gospel ONSDAGAR KL 19.00-21.15 Kören är öppen för alla som gillar gospel, pop, soul på svenska och engelska! Vi träffas på onsdagar kl 19.00-21.15 med start 31 augusti. Prova på gratis de tre första övningarna. Avgift: 400:-/termin Ingen föranmälan www.sodertornkyrkan.se	2016-09-25 14:21:43	1866		2	20	1	2	1	Y	3	2	1	YES	2	4	2
Public Place	1	Svea KONSTÅKNINGSKLUBB Vill ditt barn lära sig åka skridskor eller börja med konståkning? Svea konståkningsförening har skridskoskola för barn från 4 års ålder. Träning sker på torsdagar och/eller söndagar i Björkängshallen B i Huddinge. Skridskor finns art hyra i de flesta storlekar. Höstens skridskoskola börjar vecka 34. Läs mer och anmäl ditt barn på www.sveakk.se och fliken skridskoskola.	2016-09-25 14:25:52	1866		2	3	1	2	1	Y	2	1	1	YES	2	4	1
Public Place	1	ABF HUDDINGE Måndagsdansen med Wahlén och Segeblad! Kom och dansa till levande musik med Wahlén och Segeblad! Genom dansen får du tillfälle att släppa loss till härlig, medryckande musik. Dansen ger dig bättre kondition, styrka och kroppskontroll. Den ger dig även möjlighet till möte med nya människor och vänner som delar ditt intresse för dans. Allt du behöver är ett par lämpliga skor och ett gl…	2016-09-25 14:32:16	1866		2	20	1	2	1	N	3	2	1	NO	6	4	2
Public Place	1	Är du senior och vill sjunga i kör? Kom på startmötet! Onsdag den 18 augusti klockan 10.00-11.30 Rosendalsgården, Vänhemsvägen 24, Huddinge. Repdatum - onsdagar på Klintvägen 9, Segeltorp 24 augusti 10.00-11.30 7 och 21 september 15.30-16.30 5 och 26 oktober 15.30-16.30 16 november 15.30-16.30 7 december 15.30-16.30 Vid frågor eller anmälan kontakta NN: ### eller NN: ###	2016-09-25 14:39:08	1866		2	20	1	2	1	Y	2	3	1	NO	6	4	2
Public Place	1	Magdans Huddinge C Vi har för nybörjare, fortsättare och avancerade i Huddinge C Läs gärna mer på dansverket.se Plats för nytänkande Studieförbundet Vuxenskolan	2016-09-25 14:10:36	1866		2	20	2	2	1	N	3	2	1	YES	2	4	2
Public Place	1	barn konsten En jävla (norm)al utställning Vernissage tisdag 13 september kl. 17-19 Vi styrs av normer som bestämmer hur vi beter oss och hur vi ska se ut. Genom film och fotografi uppmärksammar 10 ungdomar normer som styr vår vardag. Utställningen pågår 13 september - 12 november 2016 BIBLI OTEK HUDDINGE Vårby bibliotek med Barnkonsten bibliotek.huddinge.se	2016-09-25 14:20:24	1866		2	20	1	1	1	Y	3	2	1	YES	2	4	2
Public Place	1	FLYGELN VID FULLERSTA GÅRDS LÖRDAG 24/9 HUDDINGE KONSTNÄRSKLUNN Konsten i Huddinge hänger på mig 2016 NU Utställningen pågår Till t.o.m 16/10 H•K•K vänner H•K•K www.huddingekonstnarsklubb.se - www.hkkkvanner.se Fullersta Gårdsväg 18, Öppet Lördag - Söndag 12 - 16:00	2016-09-25 14:23:10	1866		2	20	1	1	1	Y	4	4	1	YES	6	4	2
Public Place	1	À la Carte Teatern presenterar GÅ DIN EGEN VÄG en amatörföreställning i stadsdjungeln Fullersta Bio Norrängsvägen 1 Huddinge Fredag 30/9 kl. 19.00 Lördag 1/10 kl. 19.00 Fredag 7/10 kl 19.00 Lördag 8/10 kl 19.00 Studieförbundet Vuxenskolan Biljetter beställs på @@@ eller ring: ### Pris: 150 kr, barn/ungdom 75 kr	2016-09-25 14:23:32	1866		2	20	2	2	1	Y	3	2	1	YES	6	4	2
Public Place	1	HUDDINGE Loppmarknad Centrumloppis Huddinge Centrum Söndag 28 aug 11-16 Söndag 25 sep 11-16 Söndag 23 okt 11-16 Söndag 27 nov 11-16 Bordshyra 200kr Bokning via mail till @@@ @@@ ### NN	2016-09-25 14:32:31	1866		2	2	1	2	1	Y	3	2	1	NO	6	4	2
Public Place	1	onsdag 5 oktober 2016 kl 19,00 Stuvstakyrkan Mellanskogsvägen 3, Huddinge Världens Barn GALA AMINAH AL FAKIR CARL-AXEL o MONICA DOMINIQUE musik- och dramaklass från SÖDERTÖRNS FRISKOLA STUVSTA GOSPEL ULRIKA SÖDERPALM LÖHR, Världens Barn GABRIELLA RIDDEZ, Diakonia OVE SOMMAR, konferencier ...sen blir det mingelfika i församlingssalen!	2016-09-25 14:37:54	1866		2	20	1	2	1	Y	3	5	1	NO	4	4	2
Public Place	1	E-boks-handledning Vill du ha hjälp att ladda ner e-böcker? Välkommen till Huvudbiblioteket varannan torsdag, jämn vecka kl. 14-15:00, från den 21 september till den 14 december. Handledningen är individuell och gratis. Du behöver inte anmäla dig i förväg. Ta gärna med egen mobiltelefon, surfplatta eller läsplatta. BIBLI OTEK HUDDINGE Huvudbiblioteket – en del av Bibliotek Huddinge bibliotek.hudd…	2016-09-25 14:39:50	1866		2	12	1	1	1	Y	3	1	1	YES	2	4	2
Public Place	1	Support your local team HIF - FC LINKÖPING söndag 2 okt, avspark 16.00 Källbrinks IP division 2 Herr entre 40 kr ungdom/pensionär 100 kr vuxen Adidas huge INTERSPORT Nya Pulsen Deli Italia	2016-09-25 14:13:39	1866		2	18	1	2	1	Y	3	2	1	NO	5		2
Supermarket	2	SÖNDAG 16 OKTOBER RUDANS FRILUFTSGÅRD HANINGE TRAIL 2016 ETT RIKTIGT TERÄNGSLOPP I HANINGES SKOGAR! Trött på asfalt och välluktande elljusspår? Då är detta något för dig! I Rudans underbara skog kan du välja på 3 banlängder. 5 KM: Skogsmiljö med backar. 10 KM: Blandat underlag i skogsmiljö. Backar finns! 16,7 KM: Gamla kultförklarade skid-SM-banan från 1990. Innehåller alla typer av underlag utom…	2016-09-25 14:34:56	1866		2	18	1	2	1	Y	3	2	1	YES	2	2	2
Public Place	1	Hej Jag bor i andra hand sedan några år. Nu måste jag flytta. Jag söker därför en liten lägenhet . Ring mig gärna om du vill hyra ut. Kan även tänka mig att hyra rum. Goda referenser Tel ### @@@	2016-09-25 14:43:57	1866		2	5	7	1	1	Y	2	1	1	NO	6		1
Public Place	1	Börja spela pingis! För vem? Du är 7-9 år, tjej eller killa. Var? Boo rackethall, Mensättravägen 36, Saltsjö-Boo När? Onsdagar 16.30-17.30 eller, Lördagar 10.00-11.00 eller 11.00-12.00 Anmälan pingisskola? boopingis.se Träningsavgift?: 1295:-/termin, låneracket ingår Välkomna! Boo KFUM Pingis	2016-09-25 14:51:33	1866		2	3	1	2	1	Y	2	3	1	YES	6	2	2
Public Place	1	ÖRNSKÖLDSVIKS KOMMUN Ärende 34. Medborgarförlag, nolltolerans mot tobak vid evenenamg för 35. Medborgarförslag, Ny bardplats, fd. Florabadet. 36. Medborgarförlag, belysning i Bonäset 37. Medborgarförslag, solkraft och fräschare luft 38. Medborgarförslag, inomhuslekpark Bordlagt medborgarförslag 39. Medborgarförslag, missbruksvård i Mogården Beslutslogg 40. Kommunfullmaktigtes beslutslogg, septemb…	2016-09-26 06:37:33	1855		1	23	4	1	1	Y	3	1	1	YES	6	4	1
Public Place	1	Kungörelse – flyttat fordon Nedan angivna fordon har flyttat med stöd av lagen (1982:129) Omflyttning av fordon i vissa fall (LFF) till kommunens uppställningsplats. Om fordonet löses ut inom 3 månander efter åvan angivet anslagsdatum, kommer äganderätten att övergå till kommun enligt bestämmelserna i LFF. Detsamma gäller eventuella föremål som finns i fordonet.	2016-09-26 06:43:08	1855		1	24	4	1	1	Y	3	1	1	NO	6	4	1
Public Place	1	ÖRNSKÖLDSVIKS KOMMUN Valärenden 14. Fyllnadsval ledamot i samällsbyggnadsnämnden, efter NN (S) 15. Fyllnadsval ersättare, humanistiska nämnden efter NN (S) 16. Fyllandsval ersättare, humanistiska nämnden efter NN (S) 17. Avsägelse och fyllnadsval, kultur-och fritidsnämnden, efter NN (C) 18. Avsägelse och fyllnadsval, ledamot i bildningsnämnden efter NN (S) 19. Avsägelse och fyllnadsval i kommunst…	2016-09-26 07:02:26	1855		1	23	4	1	1	Y	3	1	1	NO	1	4	1
Public Place	1	Överförmyndarens mottagningstider under 2016 I Örnsköldsviks kommun finns en överförmyndare samt en ersättare. Sju tjänsteman (6,5 tjänst) sköter den löpande tillsynen över förmyndarskap, godmans förvaltarskap. Överförmyndare: NN (s) @@@ Ersättare: NN (c) @@@ KONTAKT Överförmyndarens kansli, Nygatan 16. Telefontid måndag-torsdag: 09.30 – 11.30 NN ### NN ### NN ### NN ### NN ### NN (ensamkommande …	2016-09-26 07:09:43	1855		1	24	4	1	1	Y	3	1	1	YES	6	4	1
Public Place	1	Hullsta Gård 50 år! SOLLEFTEÅ Dansprogram Fredagssvängen Hösten 2016 21/10 Per-Håkans 4/11 Kindbergs 18/11 Blender 2/12 Donnez 16/12 Jannez 21:00-01:00 Danssupé förbokas	2016-09-26 06:57:27	1855		1	20	1	2	1	Y	3	2	1	YES	6	1	2
Public Place	1	MORMORS SALONGER! Lördag 3 oktober kl. 19.00. Tre rätters middag samt en SPRUDLANDE UNDERHÅLLNING!! 350 kr/peson. Boka senast 27/9! Boka/Betala till: BG 719 – 6694 Uppge namn & tel.nr. samt antal biljetter! Medborgarhuset TREHÖRNINGSJÖ VARMT VÄLKOMNA!	2016-09-26 07:16:15	1855		1	20	1	1	1	Y	3	2	1	NO	5	3	2
Public Place	1	Myggjagare & Näbbstövlar EN MUSIKALISK BERÄTTARRESA GENOM 50-60-70-TAL Underkjolar av skumgummi är högsta mode, en krona ger 20 Dixiekolor och grannen skaffar sig en Opel Olympia. Gunnar Wiklund sjunger Tala närmre, i Folkets park slår Rock-Olga igenom och man dansar till Twilight time. Så småningom gör de kortkorta kjolarna entré och många i byn skaffar PV eftersom "Volvos värde varar". Melodife…	2016-09-26 07:05:18	1855		1	20	1	2	1	Y	3	2	1	YES	6	3	2
Public Place	1	LUNCHGONG på ShenDao Hösten 2016 Vila och hämta ny kraft i gongens välgörande vibrationer! Fredagar kl 12:00 – 12:30 Datum: 2/9, 7/10, 4/11, och 2/12 Pris: 100 kr, kontant eller swish Boka: @@@ ### Obokade platser är öppna för drop-in Hjärtligt välkommen! NN www.yogiontheroad.se	2016-09-26 07:23:33	1938		2	3	2	1	1	Y	2	2	1	YES	6		2
Library	1	DAMKÖR 2016 INVIGNINGSKONSERT TORSDAG 29/9 kl. 20.00 DOMKYRKAN KÖRMARATON FREDAG 30/9 kl. 18.30 BAPTISTKYRKAN FESTIVALKONSERT LÖRDAG 1/10 kl. 17.00 UKK För mer information, besök LACAPPELLA.SE I SAMARBETE MED SVERIGES KÖRFÖRBUND TRILLER MAT&BRÖD VÄRLDSKLASS UPPSALA	2016-09-26 07:27:00	1938		2	20	1	1	1	Y	3	1	1	YES	2	3	2
Supermarket	1	Välkommen till Friluftsfrämjandet Uppsalas "öppet-hus" söndagen den 25 september 11.00-14.00 vid Sunnerstastugan! Skogsmullelopp och skattjakt utmed Skogsmulles stid för alla barn. Paddla kanot – testa gåstavar – kasta livlina – lek på motorikbanan – åk "pulka" med en badring med för en 12 meter lång plastmatta. Möt engagerade ledare som visar olika verksamheter. Information om vinterns skidskola…	2016-09-26 07:27:04	1938		2	20	1	2	1	Y	3	2	1	YES	2	1	2
Public Place	1	Ekolnsnäs Sommarcafé Vi har bakverk, smörgåsar, våfflor, pajer, piroger, glass Öppet 11-17 dagligen. Varmt välkomna ! Besöksadress: Lövängsvägen 49, Uppsala. Åker du bil följ skylt från Vårdsätravägen. Buss nr 11 från Dragarbrunnsgatan, du går av vid Gullvivevägen och följer skyltningen.	2016-09-26 07:27:06	1938		2	2	2	1	1	Y	2	1	1	NO	4	3	1
Public Place	1	Uppsala KOMMUN Invigning av nya Svankärrsparken Nu inviger vi den upprustade och omgjorda Svankärrsparken som har något för alla åldrar. Lek i vår torpstuga, bygg slutt i sandlådan, tävla på boulebanan, ta det lugnt i en av hammockarna eller grilla med familjen på grillplatsen. Tid: torsdag 8 september 13.00 Plats: Svankärrsparken (Svankärrsvägen/Blomstervägen) Invigningen inleds med tal av NN (M…	2016-09-26 07:27:53	1938		2	20	4	2	1	Y	3	2	1	YES	6	3	2
Public Place	2	DAMKÖR 2016 INVIGNINGSKONSERT TORSDAG 29/9 kl. 20.00 DOMKYRKAN KÖRMARATON FREDAG 30/9 kl. 18.30 BAPTISTKYRKAN FESTIVALKONSERT LÖRDAG 1/10 kl. 17.00 UKK För mer information, besök LACAPPELLA.SE I SAMARBETE MED SVERIGES KÖRFÖRBUND TRILLER MAT&BRÖD VÄRLDSKLASS UPPSALA	2016-09-26 07:28:18	1938		2	20	1	1	1	Y	3	1	1	YES	2	3	2
Public Place	1	Tema: Balansera kropp och sinne - upplev själen. v 36-50 (ej v 44) 1960 kr (14 ggr) v 36-43, 1120 kr (8 ggr) v45-50, 840 kr (6 ggr) 10% rabatt för studenter och arbetslösa Digitalt kursmaterial ingår Ons kl 18 - 19:30, Verkstan, Alsikeg. 6 Tor lk 16:30 - 18, Osaia, Drottningg. 9 Tor kl 19:30 - 21, ShenDao, Vretgränd 16 Fre kl 7:30 - 9, WinWin, Svartbäcksg. 23 Sön kl 18 - 19:30, ShenDao, VRetgränd…	2016-09-26 07:30:27	1938		2	3	2	1	1	Y	3	2	1	YES	6	3	2
Public Place	1	Bjud in yogan i ditt liv! Kundaliniyoga är en enkel, effektiv och kraftfull metod för alla som vill skapa hälsa och balans i kropp, sinne och själ. Ingen tidigare erfarenhet av yoga är nödvändig för att du under en kurs, ibland redan på det första tillfället, ska kunna uppleva yogans positiva effekter. Ett regelbundet utövande ger bl.a. starkare nervsystem och immunförsvar, ökad flexibilitet och …	2016-09-26 07:31:59	1938		2	3	2	1	1	Y	3	2	1	YES	6	3	2
Public Place	2	Uppsala KOMMUN Invigning av nya Svankärrsparken Nu inviger vi den upprustade och omgjorda Svankärrsparken som har något för alla åldrar. Lek i vår torpstuga, bygg slutt i sandlådan, tävla på boulebanan, ta det lugnt i en av hammockarna eller grilla med familjen på grillplatsen. Tid: torsdag 8 september 13.00 Plats: Svankärrsparken (Svankärrsvägen/Blomstervägen) Invigningen inleds med tal av NN (M…	2016-09-26 07:32:21	1938		2	20	4	2	1	Y	3	2	1	YES	6	3	2
Public Place	1	10 KORT 850:- PER GÅNG 95:- FITNESS BOOT CAMP SÄVJA SUNNERSTA GRÄNBY INSANITY WORKOUT PROVA GRATIS COME AND GET FIT WITH EX BRITISH MILITARY NN KOM I FORM SVETTIS HUSET START V.40 Måndag till Torsdag kl 17:00 Lördag kl 10:00 10-Kort 850:- Per gång 95:- @@@ TEL: ### WWW.FACEBOOK.COM/BOOTCAMPUPPSALA	2016-09-26 07:33:01	1938		2	18	2	1	1	Y	2	2	1	YES	6	2	1
School	1	### Stödtelefon för dig som upplevt hot och våld. Kvinnofridslinjen är en nationell stödtelefon för dig som utsatts för fysiskt, psykiskt eller sexuellt våld. Vår uppgift är att lyssna, ge dig professionellt stöd och upplysa om var du kan få hjälp. Vi har tystnadsplikt och du kan välja att vara anonym. Du ringer oss gratis och ditt samtal syns inte på telefonräkningen. Läs mer på www.kvinnofridsl…	2016-09-26 09:10:11	1897	2	1	24	1	1	1	Y	3	2	1	YES	6		2
Public Place	1	BÅT STULEN Denna båt blev stulen från Sjöängens brygga i slutet av maj eller i början av juni. Har du sett den? RING ### HITTELÖN UTLOVAS	2016-09-26 09:59:10	1866		2	10	7	1	1	Y	2	2	1	NO	1		2
Public Place	1	HALLOWEEN POP-UP BUTIK ÅSGATAN 18 FALUN BREDVID O'LEARYS 17 OKT - 6 NOV HALLOWEEN BUTIKEN	2016-09-26 10:12:38	1897		2	2	2	2	1	Y	3	3	1	NO	6	3	2
Public Place	1	Favorit i repris! DALARNAS ORKESTERFÖRENING GRUNDAD 1919 Lördag 1 oktober 2016 1700 Kristinehallen, Falun Musikaliskt möte mellan Stig Linds Little Big Band & Dalarnas Orkesterförening NN, dirigent Biljetter: 200 kr (6 – 20 år 40 kr) • Ingår i Konsertpaketet Övriga förköp hos alla biljettförmedlande turistbyråer i Dalarna www.dalarnasorkesterforening.se	2016-09-26 10:16:20	1897		2	20	1	2	1	Y	3	2	1	YES	6	3	2
Public Place	1	KONSERT En hyllning till ABBA Vol. 2 KRISTINEHALLEN 19/11 KL 15&19 BILJETTER:WWW.VISITSODRADALARNA.SE Dirigent/kapellmästare: NN * Kontrabas: NN * Gitarr: NN och NN * Flygel: NN * Slagverk. NN * NN * Violin: NN * Tvärflöjt: NN	2016-09-26 10:19:10	1897		2	20	2	2	1	Y	3	2	1	YES	2	3	2
Public Place	1	Gallery JT AB PROMENADEN 29 FALUN Butik ÖPPET:Torsdagar 16.30 – 17.30 Fredag, Lördag: 12.00 – 13.00 MÖBLER: tex, Runt bord med glasskiva:495:- 1700-tals möblerSkåp 1799 med blomstermålningar: 26.000:- Runt bord 1700-tal 7.500:- +Gustaviansk soffa 15.000:- 4 st blå GEDIGNA DALASTOLAR 600:-/st eller 2000._ för alla 4 Nyrokoko runt bord: 1.500:- 2 nyrokokostolar finst skick 1.600:- Murano 1949 glasf…	2016-09-27 08:08:25	1897		2	2	2	1	1	Y	2	2	1	NO	4	3	2
Public Place	1	koll PÅ KONSUMTION Handla rätt! V39 www.kollpakonsumtion.se FALUN	2016-09-27 08:21:27	1897		2	24	8	2	1	Y	3	1	1	YES	2	3	2
Public Place	1	KONSERT FALU FEST O. MÖTEN HYTTG. 28 SÖNDAG 2/10 KL 18.00 NN O. NN NN O. NN GÄSTAT AV SÖNDAGSORKESTERN ENTRÉ 100:- FIKA FRÅN 17.00	2016-09-27 08:29:47	1897		2	20	1	2	1	Y	2	2	1	NO	5	3	2
Public Place	2	KONSERT En hyllning till ABBA Vol. 2 KRISTINEHALLEN 19/11 KL 15&19 BILJETTER:WWW.VISITSODRADALARNA.SE Dirigent/kapellmästare: NN * Kontrabas: NN * Gitarr: NN och NN * Flygel: NN * Slagverk. NN * NN * Violin: NN * Tvärflöjt: NN	2016-09-26 10:16:45	1897		2	20	2	2	1	Y	3	2	1	YES	2	3	2
Public Place	1	KONSERT ONSDAG 5/10 KL 19.00 NN NN NN SPELAR LÅTAR AV NN, NN OCH MYCKET ANNAT ENTRÉ 125:- FÖRKÖP TURISTBYRÅN FALU FEST O. MÖTEN HYTTGATAN 28. ÖPPNAR 18.00 FIKA	2016-09-26 10:18:54	1897		2	20	1	2	1	Y	2	5	1	NO	4	3	2
Public Place	2	JUST NU FÖRSTA MÅN 0 kr* Ät dig starkare MED VIKTVÄKTARNA MAT & MOTION Ät dig starkare med ViktVäktarna. God och hälsosam mat gör inte bara att du går ner i vikt - du mår bra! Kom till ett möte så berättar vi mer. Varmt välkommen! FARSTA, FARSTA GÅRD, FARSTAÄNGSVÄGEN 22-26 Magasinet, vån 1. Mellan Farsta sim- och Farsta idrottsplats. Parkering finnes vid idrottshallen, låg avgift. Buss 185V fran …	2016-09-26 10:17:07	1866		2	3	2	2	1	Y	3	2	1	NO	4	3	2
Public Place	1	SIK 1936 Division 3 södra Herrar Sköndals IK-Huddinge IBS Sköndalshallen Söndag 25/9 12:00 Välkomna!	2016-09-26 10:25:22	1866		2	18	1	2	1	Y	3	1	1	NO	5		2
Public Place	1	|| Bagarfruvägen 44 || Sköndal || Lördagen 15 Oktober || kl 12-16 || OKTOBERFEST Fest på torget Grillning Lotteri Loppis på Sköndalsgården Café med hembakat bröd m.m. Vill du boka bord? (Ett bord kostar 70 kronor) Ring Sara på ### Arrangeras av Ungdomssupport	2016-09-26 10:29:39	1866		2	14	1	2	1	Y	3	1	1	NO	6	3	2
Public Place	1	HÖSTENS BARNKLÄDESBYTE Välkomna att fynda begagnade barn- och babykläder, skor, leksaker, vuxenkläder och mycket mer! Lördagen den 24 september 2016 kl 10:00 - 13:00 I Gubbängsskolans matsal, Gubbängsvägen 63-69 Servering finns. Arrangör: Föräldraföreningen i Gubbängen	2016-09-26 10:31:11	1866		2	2	1	2	1	Y	2	3	1	NO	4	2	2
Public Place	1	Hjälp med datorn ! Om din dator krånglar så kan du få hjälp av kunnig datatekniker med: - Ominstallation /alternativt rensning av virus mm. - Räddning av bilder och dokument från dator som ej startar. Installation av system och hårdvara såsom; - Digitalkamera, videokamera - Skrivare och andra tillbehör - Hemma-nätverk mm. Privatlektioner i allmän datorhantering samt: utökade kunskaper i MS Office…	2016-09-26 10:32:44	1866		2	3	7	1	1	Y	2	3	1	NO	6	3	1
Public Place	1	Vår lilla Pelle verkar ha försvunnit sedan ca tre veckor. Vi har trott att han skulle komma tillbaka, men icke. Har ni sett honom någonstans så vill vi gärna ha upplysningar. Om ni har tagit hand om honom så vill vi gärna ha honom tillbaka. Hittelön fås. Tel Bosse; ###, Tel Elin; ## Vi bor på ___vägen 26 i ___ Vänliga hälsningar NN & NN	2016-09-26 11:00:06	1866		2	9	7	1	1	Y	2	2	1	NO	6	1	2
Public Place	1	SUNNY HENNA Är du sugen på en temporär tatuering eller intresserad av att prova på den hetaste sommartrenden just nu? Är du nyfiken på Henna och den vackra konstformen Mendhi? För mer info/bokning: www.sunnyhenna.se Instagram: Sunny_Henna_Stockholm, Facebook: Sunny Henna Artist Stockholm Tel/SMS: ###	2016-09-26 11:04:11	1866		2	3	2	2	1	Y	2	2	1	YES	6	3	2
Public Place	1	Second Hand Butik Sköndalsvägen 79 Välkommen	2016-09-26 11:05:58	1866		2	2	2	2	1	Y	1	1	1	NO	4	1	1
Public Place	1	KOM IHÅG PUB afton KL. 17.30 den 29/9 Ju mer vi är tillsammans ju gladare vi bli... PRO Välkomna!	2016-09-26 11:14:46	1866		2	20	1	2	1	Y	1	4	1	NO	5	3	1
Public Place	1	FOC Farsta Ishockey bjuder in till Hockeyskola För tjejer och killar 5-10 år Mål: - Lära sig åka skridskor - Lära sig de första grunderna i ishockey Utrustning: Skridskor, hjälm med galler, halsskydd, handskar samt klubba När: Torsdagar och Söndagar Start 29 september 2016 40 tillfällen fram till 30 mars 2017 Inga föräldrar på isen Kostnad 750:- Skridskoskola För tjejer och killar 4-10 år Mål: - …	2016-09-26 11:18:53	1866		2	3	1	2	1	Y	2	1	1	YES	6	3	2
Public Place	1	Coast to Coast BILDER FRÅN EN AMERIKANSK RESA "Street, landskap och några vänner..." Foto: NN Galleri Konstiga Fönstret Hökarängens centrum 17-22 september 2016	2016-09-26 11:21:59	1866		2	20	1	2	1	Y	3	2	1	NO	5	3	2
Public Place	1	GÅ UT MED HUNDAR hej! Vi är 3 och ibland 2 eller 1 personer vi är 9-10 år gamla så vi kan inte gå ut med olydiga eller stora hundar och så kan vi inte gå på promenader på låv eller helger Det kostar 20 kr för 1 Timme och 5 kr går till WWF Vi är lediga: Måndag: 13.20-16.00 Tisdag: 14.00-16.00 Onsdag: 14.20-16.00 Torsdag: 14.00-16.00 Vi kanske inte är lediga även om det står att vi ska vara det! Vi…	2016-09-26 11:26:57	1866		2	3	7	2	1	Y	1	4	1	NO	5		2
Public Place	1	Författarbesök i Sköndal: Emilia Degenius Var? Sköndals bibliotek Biblioteket för besök av författaren och psykologen Emilia Degenius som berättar om sin kritikerrosade roman "Åka skridskor i Warszawa". När? Mån 26/9 kl. 19 Emilia Degenius. Foto: Cato Lein. I sin självbiografiska roman återvänder Emilia Degenius till Warszawa, fyrtio år efter den ensamma utvandringen till Sverige. Hon har många f…	2016-09-26 11:27:34	1866		2	20	1	2	1	Y	3	2	1	YES	6	3	2
Public Place	1	HEJ FÖRÄLDER SÖKER DU BARNOMSORG? Familjedaghemmet Druvan erbjuder plats för ditt barn i lugn och trygg miljö, fokus ligger på utevistelse för en friskare och mer aktiv barngrupp. Verksamheten ligger på Gråhundvägen 146, i Norra Sköndal, bakom Hemköp, 1 minut från norra Sköndals busshållsplats. Är du intresserad och vill veta mer? Välkommen att höra av dig! Familjedaghemmet Druvan NN TEL: ### FB …	2016-09-26 11:35:02	1866		2	3	2	2	1	Y	2	3	1	NO	6	3	2
Public Place	1	LOPPIS På Lilltorpet Fre 7/10 12-17 Lör 8/10 9-16 Sön 9/10 10- 12 VÄLKOMNA	2016-09-26 10:17:42	1897		2	2	8	1	1	Y	2	1	1	NO	5	3	1
Library	3	DALA TEATERN DEN ITUSÅGADE DAMEN Premiär 10 sept - spelar t.o.m 15 okt i Falun ### | www.dalateatern.se | Visit Södra Dalarna	2016-09-26 10:27:11	1897		1	20	2	2	1	Y	3	2	1	YES	6	1	2
Library	1	Vernissage kl. 15-17 den 27de September NN NN Utställningen pågår fram till den 11/10 på Dalarnas Museum Varmt Välkomna! I SAMARBETE MED Dalarnas museum FALUN	2016-09-26 10:31:12	1897		1	20	1	2	1	Y	3	2	1	NO	5	1	2
Library	1	NN REGI | NN SOM ESTER | NN DIRIGENT | DALASINFONIETTAN DUBBLA FÖRESTÄLLNINGAR! Familjekonsert ESTER LETAR ORKESTER NÄR ESTER VAKNAR HAR KONSERTEN REDAN BÖRJAT! OJ, OJ, NU ÄR DET BRÅTTOM. SNABBT LETA INSTRUMENT OCH SPELA MED. MEN DIRIGENTEN ÄR INTE INTRESSERAD AV ESTERS SOLOINSATSER. TUR ATT ESTER ÄR ENVIS! LÖRDAG 24 SEPTEMBER 13.00 & 15.00 KRISTINEHALLEN FALUN ENTRÉ 50 KR FÖR ALLA. FÖRKÖP VIA TU…	2016-09-26 10:34:29	1897		1	20	2	2	1	Y	3	2	1	YES	2	1	2
Library	1	NATURSNOKARNA Naturutflykt för barn och föräldrar! Var? Rottneby Naturreservat Samling ovanför P-platsen När? 18 sept Tema: Smådjur 23 okt Tema: Mossor och lavar 27 nov Tema: Djuren på vintern Vi bjuder på korv med bröd Kl. 10.00 - 12.00 Tag med eget fika! Kontakt: NN, ### NN, ### Studie främjandet Naturskyddsföreningen	2016-09-26 10:38:01	1897		1	20	1	2	1	Y	3	4	1	NO	1	1	2
Library	1	NN Fotografier STONES AND ALIENS KOPPARHATTEN 5/9 - 20/11 2016 Dalarnas museum	2016-09-26 10:42:35	1897		1	20	1	1	1	Y	3	2	2	YES	2	1	2
Library	1	3 OKTOBER FÖREDRAG OM KARIN LARSSON FÖRBOKA GÄRNA PÅ CARLLARSSON.SE UNDER SEPTEMBER GUIDADE KARIN-VISNINGAR VARJE DAG KL 16.30 FÖRBOKA GÄRNA PÅ CARLLARSSON.SE Karin tar plats i ateljén under september – möt konstnären Karin Larsson! Under september visar vi Karin Larssons målerikonst i ateljén på Carl Larsson-gården. I ett samarbete med Hallsbergs Kommun och Dalarnas museum lånar vi in några av K…	2016-09-26 10:45:29	1897		1	20	1	1	1	Y	3	2	1	YES	6		2
Library	1	Falu Kristine kyrkan • Söndag 2/10 kl 18 Engelsk körmusik Falu Kristine kyrkokör NN orgel NN dirigent Musik av Ireland, Thalben-Ball Vaughan Williams och Finzi m fl Fri entré - kollekt Svenska kyrkan FALUN	2016-09-26 10:46:54	1897		1	20	1	1	1	Y	3	2	1	NO	5	1	2
Library	1	FALU UNGDOMSCOACHERS EVENTGRUPP SKAPET SÖKER DIG Vill du vara med och bestämma, tänka, tycka till, skapa och genomföra events, workshops , föreläsningar eller något helt annat i Falu Kommun? I höst startar Faluns Ungdomscoacher eventgruppen SKAPET. EN grupp för dig mellan 13-25 år där du tillsammans med andra kan genomföra dina idéer, lära dig mer om att genomföra projekt av olika slag, samt får …	2016-09-26 10:48:44	1897		1	20	4	2	1	Y	3	2	1	NO	6	3	2
Library	2	falun.se/ Gemenskap och aktiviteter på Faluns träffpunkter Umgås, fika, skratta, sticka, snickra eller träna tillsammans. För dig som är pensionär finns aktiviteter av alla slag på på Faluns olika träffpunkter. Träffpunkt Britsarvet, Tegelvägen Falun Träffpunkt Hosjögården, Centralvägen Hosjö Träffpunkt Sandtäktsgården, Bjursåsvägen Bjursås Träffpunkt Smedjan, Sturegatan Falun Träffpunkt Svärdsjö…	2016-09-26 10:53:03	1897		1	20	4	1	1	Y	3	2	1	YES	6		2
Library	1	Rödfärg och slagg – samtida fotografi ur våra samlingar NN | NN Gruvmuseet Loftet 6 juni – 30 september 2016 FALU GRUVA	2016-09-26 10:55:32	1897		1	20	1	1	1	Y	3	2	1	NO	5		2
Library	1	www.dalarnasmuseum.se Öppen kroki/modellteckning Hösten 2016 Kroki av NN Lördagar Kl. 12:15 - 14:00 Hörsalen Dalarnas museum 50kr/gång September 3, 17 Oktober 1, 8, 29 November 12, 26 December 17 Januari 2017: 21 För mer information: www.modellteckning.se Dalarnas museum	2016-09-26 10:58:57	1897		1	20	1	1	1	Y	3	4	1	YES	6	1	2
Library	1	Kalay kooxda la hees FALU INTERNATIONELLA KÖR – En mötesplats för alla Falubor Join Kulturskolan´s exciting new international choir. All ages! All Cultures! All people welcome! On Thursdays: From 8 September 18:00, Kulturhuset tio14 Free! No prevoius choir experience needed. www.falun.se/fik www.facebook.com/fikfalun ### KULTURHUSET tio14	2016-09-26 11:10:39	1897		1	20	4	2	3	Y	3	1	3	YES	6	1	2
Library	1	Välkommen till Stefansgården, Vandrarv. 2, Hälsinggården Öppen förskola, måndagar kl. 9.30-11.30, start 5/9 Magiska Påsen, fredagar jämna veckor kl. 9.30-11.30, start 26/8 Fredagsmys, fredagar ojämna veckor kl. 9.30-11.30 , start 2/9 Svenska kyrkan FALUN Frågor? NN ###, NN ### Gäller till och med 16/12	2016-09-26 10:29:18	1897		1	20	1	2	1	Y	4	2	1	NO	6	1	2
Library	1	Stärk din självkänsla! Vi träffas och gör olika övningar som stärker oss själva, vi får bättre självförtroende och blir mer säker på oss själv. Exempel på aktiviteter är dans, teater, målning, diskussioner Vi träffas hos ABF i Falun, Trotzgatan 47. Torsdagar 15.00-18.00 Vi startar så snart vi har fått ihop en grupp. Ingen kostnad. Ledare: NN Anmäl dig till ABF: ### Eller mejl @@@ ABF ARBETARNAS B…	2016-09-26 10:35:34	1897		1	20	1	2	1	Y	3	2	1	NO	6	1	2
Library	1	www.dalarnasmuseum.se EKOBAZAR 22 oktober 12 - 17 Håll utkik efter info på facebook! Studie- främjandet KOPPARHATTEN CAFÉ & KÖK Dalarnas museum	2016-09-26 10:32:48	1897		1	2	1	2	1	Y	3	2	1	YES	6	1	2
Public Place	1	FALU JAZZ KLUBB 40 år 1976 – 2016 Välkommen till våra härliga musikkvällar Jazz Lisen Elwin 4 Lisen Elwin - sång, Ann Blom - piano Leo Lindberg bas, Ali Djerifi - trummor 29 september kl. 19.00 Inträde: Medlem 150:- / Icke medlem 200:- / Gratis för ungdomar upp till 25 år! Soppa, kaffe/té och smörgåsar till klubbpris. GAMLA ELVERKET Studie- främjandet www.falujazz.se Nästa konsert 13/10 ANDREAS H…	2016-09-26 10:45:37	1897		2	20	1	2	1	Y	3	2	1	YES	2	3	2
Supermarket	1	Slöa Knivar! Privat , Resturang , Butiker mm Knivsliperi Finns i Håknäs Fällavägen 6 , från E4 så är det första huset på vänster sida efter Botniabana ca 700 meter . Ni är välkomna att ringa , eller lämna knivar i ett knivinkast i dörren där det står knivsliperi. Prislista Knivar 79:- st ( knivar som hämtas & återlämnas ) Knivar 60:- st (som lämnas in i Håknäs ) Köttkvarnar 80. per del ( alla del…	2016-09-26 10:56:52	1877		2	3	7	1	1	Y	2	1	1	NO	6	3	1
Supermarket	2	TRYCK Tryckfriheten 250 Utställning om tryckfriheten som i år fyller 250 år 12 september - 30 september FH Gnistans kafe arr. ABF Västernorrland & Folket i bild kulturfront	2016-09-26 11:00:23	1877		2	20	1	1	1	Y	3	3	1	NO	5	3	2
Supermarket	2	Hägglundsgympan GYMMIX GYMPA FÖR DAMER & HERRAR SKÄRPESKOLANS GYMNASTIKSAL START 5 SEPT. måndag Follow the music (Medelgympa) Ny tid & plats! 18.30-19.30 NN, ### måndag Core Ny tid & plats! 19.30-20.30 NN, ### måndag Kondition Ny tid & plats! 20.30-21.00 NN/NN/NN/NN Tisdag Funktionell träning/Core 18.00-19.00 NN, ### Tisdag Pulshöjande/kondition 19.00-19.30 NN, ### Onsdag Afro Aerobics 18.30-19.1…	2016-09-26 11:03:54	1877		2	3	1	2	1	Y	3	1	1	NO	6	3	2
Supermarket	2	ROBERT WELLS THE GOOD MUSIC TOUR ROBERT WELLS TRIO feat. MARIA WELLS BILJETTER ticnet.se alt ### FOLKAN 22/10 www.wellsmusic.se	2016-09-26 11:04:53	1877		2	3	2	2	1	Y	4	2	1	YES	6	3	2
Supermarket	2	MUSIK VÄSTERNORRLAND www.musikvasternorrland.se Sprakande klezmer med glödande hjärta TZEITE. LÖR 24 sept kl 18:00 Thuleteatern, Örnsköldsvik Förköp via Ticnet Av: Örnsköldsviks Folkmusikförening.	2016-09-26 11:11:10	1877		2	20	2	2	1	Y	3	2	1	YES	2	1	2
Supermarket	2	Nybyggt Hundpensionat Toppmodernt hundpensionat/hunddagis i naturskön miljö, strax utanför Örnsköldsvik. Varmt välkomna att boka in ett kostnadsfritt första besök hos oss på Gårdsbacken, detta med syfte att ni sedan ska känna er trygga med att lämna er hund. Mer info på Gårdsbackens hemsida, gardsbacken.se tel. ### eller ### @@@ Gårdsbacken HUNDCENTER	2016-09-26 11:19:41	1877		2	3	2	2	1	Y	3	1	1	YES	6	3	2
School	1	DANS VÄSTERNORRLAND www.dansvasternorrland.se För tävlande anmälan på hemsidan senast 20 september. SKAPA DANS LÖR 8 okt, kl 18:00 Fyren, Härnösand	2016-09-26 10:49:57	1877	2	1	20	1	2	1	Y	3	2	1	YES	6	3	2
School	1	VÄSTERBOTTENSTEATERN PRESNETERAR FinnPål En berättelse om södra lappmarkens störste nybyggare av och med NN. TORSDAG 15 SEPTEMBER KL 18.00, THULETEATERN, ÖRNSKÖLDSVIK FRI ENTRÉ ARRANGÖR: ARKENBIBLIOTEKET	2016-09-26 10:56:45	1877	2	1	20	2	2	1	Y	3	2	1	NO	5	1	2
School	1	DETTA HÄNDER PÅ BIBLIOTEKET HT 2016 Onsdag 26/10 kl.12.30 Det magiska tåget Teater Mila Musiksalen Ålder 3-5 år Speltid ca 30 min Publik max 60 barn Torsdagen 24/11 kl.9.00 Minibio: • Jims vinter 13 min • Först var det mörkt 11 Min Musiksalen Ålder 3-5 år Speltid ca 25 min Publik max 25 barn OBS!!! Biljettbokning ### Välkommen Husums Bibliotek	2016-09-26 11:00:07	1877	2	1	20	1	2	1	Y	2	5	1	NO	1	3	2
School	1	Hej! Från och med den 2/6 har Ungdomsmottagningen i Örnsköldsvik Drop-In till kurator, på torsdagar mellan 13,00-15,00. Med undantag för semester 16/6, 28/7, 4/8 och 11/8	2016-09-26 11:00:55	1877	2	1	20		1	1	Y	2	3	1	NO	5	3	2
School	1	VI BEHÖVER DIN HJÄLP! Hos oss kan du anmäla RISKER och FAROR. Det kan vara: • Risker i trafikmiljön • Farliga produkter • Bunnar utan lock • Blockerande trapphus Nu med kartfunktion! Anmäl på: www.ornskoldsvik.se/risklinjen ### Med önskan om en säker och trygg miljö. KOMMUNENS ALARMERINGSCENTRAL Risk linjen ÖRNSKÖLDSVIKS KOMMUN	2016-09-26 11:02:06	1877	2	1	24	4	1	1	Y	3	1	1	YES	6	3	2
School	3	MUSIK VÄSTERNORRLAND www.musikvasternorrland.se Sprakande klezmer med glödande hjärta TZEITE. LÖR 24 sept kl 18:00 Thuleteatern, Örnsköldsvik Förköp via Ticnet Av: Örnsköldsviks Folkmusikförening.	2016-09-26 11:04:27	1877	2	1	20	2	2	1	Y	3	2	1	YES	2	3	2
School	1	Biblioteket informerar Fr.o.m 15 juni ändra biblioteken hanteringen av reserverade böcker. För att trygga din personliga integritet. Böckerna ställs fortsättningsvis på aviseringsnumret istället för på namn. Numret står i det meddelande du får. Biblioteken ÖRNSKÖLDSVIK	2016-09-26 11:04:34	1877	2	1	24	1	1	1	Y	3	1	1	NO	5	3	2
School	1	Hur kom du till skolan när du var liten? Att skjutsa ditt barn till skolan kan kännas som en bra och trygg lösning. Men faktum är att om fler skjutsar sina barn bidrar det till en farligare trafikmiljö i skolorna. Vi kan alla hjälpas åt för vår barns framtid - DU väljer Starta en vandrande skolbuss, samåk eller lämna en bit bort från skolan! www.ornskoldsvik.se/trafikant ÖRNSKÖLDSVIKS KOMMUN	2016-09-26 11:06:25	1877	2	1	24	4	1	1	Y	3	3	1	YES	2	3	2
School	1	Genesmon - arkeologiskt friluftsmuseum Skolprogram september 2016 @@@ / www.ornskoldsvik.se/genesmon	2016-09-26 11:07:45	1877	2	1	20	1	2	1	Y	3	2	1	YES	6	3	2
School	2	Talangjakten Sök din framtid och vinn klassresa till Göteborg! Nu kan din klass vinna en resa till Yrkes-EM i Göteborg. Så här enkelt är det att vara med i "Talangjakten" • Filma eller ta en bild på ett yrke som du tycker verkar spännande. • Skriv en kort motivering varför du valde just det yrket. • Du kan ge dig ut på jakt själv eller med dina klasskompisar • Klassen startar ett instagramkonto d…	2016-09-26 11:09:25	1877	2	1	24	1	2	1	Y	3	2	1	YES	6	3	2
School	1	HUSUMS BIBLIOTEK Bemannade öppettider: Mån 9:00-19:00 Tis 9:00-16:00 Ons 9:00-16:00 Tors 9:00-16:00 Lunchstängt 12:30-13:30 Meröppet Mån-fre 7:00-21:00 ### | @@@ | bibliotek.ornskoldsvik.se	2016-09-26 11:12:38	1877	2	1	24	1	1	1	Y	3	1	1	YES	6	3	2
School	4	23 oktober NN Kanske Romeo & Julia! KANSKE ROMEO OCH JULIA? Kulturfesten Fri entré | 15:00 - 21:00 | Nolaskolan Musik, film, utställning, presentationer, dans, poesi, konst, teater, installationer och allt vi tillsammans kan komma på. Har du ett bidrag? Anmäl dig senast den 10/10 till @@@ . ÖRNSKÖLDSVIK KOMMUN	2016-09-26 11:16:19	1877	2	1	24	4	2	1	Y	3	5	1	NO	3	3	2
Public Place	1	NU-fiber i HELA Nordingrå! Vi får bidrag från jordbruksverket. Nu går vi vidare. ANSLUT DEJ NU ! Anslutningsavtal finns SERVICEPUNKTEN, Mjällom ICA. Nordingråvallen	2016-09-26 10:50:49	1877		2	24		1	1	Y	1	4	1	NO	5	3	2
Public Place	1	Temagudstjänst Konfirmanderna NN NN Fika Söndag 2/10 11:00 Gullängets kyrka Svenska kyrkan SJÄLEVADS FÖRSAMLING	2016-09-26 10:52:29	1877		1	17	1	2	1	Y	3	2	1	NO	5	1	2
Public Place	1	Sång till hälsa Barbro Bylund Måndag 19/9 14.00 Gullängets kyrka Svenska kyrkan SJÄLEVADS FÖRSAMLING	2016-09-26 11:08:10	1877		1	20	1	2	1	Y	3	2	1	NO	5		2
Public Place	1	Mässa med De äldres dag Själevad, Domsjö/Hållänget och Gullänget inbjuder till gemensam lunch för dig 70 år och äldre med make/maka/vän i Själevads församlingshem Domsjö till ### Hållänget till ### Gullänget till ### Själevad till ### Meddela också om du önskar kyrkskjuts samt särskild kost Söndag 16/10 11:00 Själevads kyrka Anmälan senast 7/10 Svenska kyrkan SJÄLEVADS FÖRSAMLING	2016-09-26 11:08:59	1877		1	17	1	2	1	Y	3	2	1	NO	1	1	2
Public Place	1	Helgmålsbön NN Lördag 1/10 18.00 Gullängets kyrka Svenska kyrkan SJÄLEVADS FÖRSAMLING	2016-09-26 11:12:37	1877		1	17	1	1	1	Y	3	2	1	NO	5	1	2
Public Place	1	Gudstjänst och barnkyrka NN, NN, NN Avtackning av Jan Grimell och välkomnande av nya medarbetare Sön 25/9 11.00 Gullängets Kyrka Svenska kyrkan SJÄLEVADS FÖRSAMLING	2016-09-26 11:12:43	1877		1	17	1	2	1	Y	3	4	1	NO	5		2
Public Place	1	Vi erbjuder kyrktaxi. Taxi ### Svenska kyrkan ÖRNSKÖLDSVIK	2016-09-26 10:58:56	1877		1	24	1	1	1	Y	3	2	1	NO	1	1	2
Other	2	Andakt Onsdagar 8.00 Örnsköldsviks kyrka Kaffe och smörgås Svenska kyrkan ÖRNSKÖLDSVIK	2016-09-26 11:03:16	1877		1	17	1	1	1	Y	3	2	1	NO	5		2
Other	1	Ju-Jutsu Nybörjare 6-9 år Tisdagar & Torsdagar 18.00 - 19.00 9-13 år Tisdagar & Torsdagar 18.00 - 19.00 14+ år Tisdagar & Torsdagar 19.00 - 20.15 Ingen föranmälan krävs Första träning tisdag 23 Aug. Ni hittar oss på Sjögatan 6M. www.oksf.se Prova gratis hela september ÖKSF ÖRNSKÖLDSVIKS KAMPSPORTSFÖRENING	2016-09-26 11:06:43	1877		1	20	1	2	1	Y	3	3	1	YES	6		1
Other	1	Missan har inte varit hemma på flera veckor. Hon är en äldre dam på snart 16 år och brukar inte försvinna så här. Vi bor på ___ gatan, och hon rör sig i området runt Ödbergska gården och upp mot ___ gatan. Hon hade ett rosa halsband på sig, ev. har hon tappat det då hon har gått ner i vikt. Kanske har någon tagit hand om henne i tron om att hon är hemlös? Vi skulle uppskatta om någon som har sett…	2016-09-26 11:13:53	1877		1	9	7	1	1	Y	2	2	1	NO	1	2	1
Other	1	Kakbuffé 7 oktober kl. 13-16 På Ödbergska gården. All försäljning går till världens barn. Personskadeförbundet RTP fyller 70 år! Det vill vi fira med en kakbuffé på mysiga Ödbergska gården. Skyttegatan 3, Ö-vik. Hembakat såklart! Lotteri! Utställning av NN 50 kr. vuxen, 20 kr. barn. Kontant/Swisch. PERSONSKADEFÖRBUNDET RTP. Örnsköldsviks lokalförening sensus	2016-09-26 11:21:57	1877		1	20	1	2	1	Y	3	5	1	NO	4		2
Other	1	Spel/lotter för dig över 18 år. Grattis, kunder! 100 830 :- Har ni vunnit i vår butik 2015. SVENSKA SPEL	2016-09-26 11:24:09	1877		1	3	2	2	1	Y	3	2	1	NO	5	2	2
Supermarket	2	ÖRNSKÖLDSVIKS FOLKHÖGSKOLA Världens män Både svenska och utlandsfödda En kurs för Dig som: - vill öka dina möjligheter att få arbete - vill ta del av andras kukturer - vill lära känna det svenska samhället - vill träna det svenska språket - tycker om skapande verksamhet Vi arbetar utifrån en helhet där teori och praktik blandas. Vi jobbar med personlig utveckling för att stärka deltagarens självk…	2016-09-26 11:00:59	1877		1	24	3	2	1	Y	3	5	1				2
Library	1	VÄLKOMMEN TILL VÅRA ÖPPNA FÖRELÄSNINGAR Fördjupa dig i flyktingfrågan För många av oss som pratar med eller om flyktingar och andra migranter är brist på kunskap ett problem. Verkligheten kring migrationen är komplex. Högskolan Dalarna har därför samlat sina lärare och forskare kring området migration och mottagande i offentliga föreläsningar dit allmänheten är hjärtligt välkomna. Höstens öppna f…	2016-09-26 11:02:32	1897		1	12	1	1	1	Y	3	2	1	YES	2	1	2
Library	1	SeniorNet Falun Datorklubben för Dig som är 65+ Vi har öppet hus Onsdagen den 24/8 kl 10- 16. VI finns i Studiefrämjandets lokaler på Slaggatan 37. Välkommen in så berättar vi mer och dricker en kopp kaffe. Väl mött! Studie främjandet	2016-09-26 11:05:34	1897		1	16	1	1	1	Y	2	1	1	NO	5	1	2
Library	1	falun.se/ Känner du till KAA? Enligt skollagen ska varje kommun hålla koll på vad kommunens ungdomar gör om de inte går i skolan. Du som är mellan 16-19 år och inte jobbar eller studerar kan bli erbjuden individuella aktiviteter. Det kallas "Kommunala aktivitetsansvaret" (KAA). Vi utgår från din situation för att hjälpa dig med din personliga utveckling. Du kan vara inskriven i skolan och göra de…	2016-09-26 11:08:25	1897		1	24	4	1	1	Y	3	2	1	NO	6	1	2
Library	1	Nystartat AMNINGSCAFÉ • riktar sig till blivande och nyblivna föräldrar, vårdpersonal eller andra intresserade av amning • 30 september 2016 kl. 10-12 • kl. 10 börjar vi med den föreläsning om Amningshjälpen i ett grupprum på Falu stadsbibliotek • kl. 11 fortsätter vi med öppna samtal eller rådgivning på Café Rekommendera • Alltid minst en hjälpmamma på plats Amnigshjälpen Vill du bli medlem i Am…	2016-09-26 11:11:20	1897		1	12	1	1	1	Y	3	2	1	NO	5	1	2
Public Place	1	Stubbsands Båtklubb Styrelsebeslut 2015-05-26 På uppdrag av årsmötet och i samråd med valberedningen utses NN till ny ordförande i båtklubben. NN, NN, NN	2016-09-26 11:05:35	1877		2	24	1	1	1	Y	2	1	1	NO	5	3	1
Public Place	1	SE INFOSIDA WWW.ORNSKOLDSVIKSTORGET.SE LG Moströms Grävtjänst - Har utbildning på enskilda avlopp - Hus dräneringar - Mindre vägarbeten - Försäljning av matjord - Försäljning av grus och makadam med egen lastbil och övrig makadam ### - ### KONTAKT PERSON - NN RING: ###	2016-09-26 11:10:42	1877		2	3	2	1	1	Y	4	2	1	YES	6	3	2
School	1	försvars UTBILDARNA MILITARY CAMP En vecka för dig som vill göra skillnad 31 okt - 4 nov, Umeå Military camp är en utmaning för dig som vill veta mer om de grundpelare som håller upp vårt samhälle vid kriser och krig: Försvarsmakten, de frivilliga försvarsorganisationerna, det svenska krisberedskapssystemet samt polisen och räddningstjänsten. Under en veckas gemenskap med andra ungdomar i gymnasi…	2016-09-26 11:01:03	1877		1	20	1	1	1	Y	4	2	1	YES	2	3	2
Public Place	2	Äpplets dag Lördag den 24 september kl. 10-15 på torget i Örnsköldsvik. Pomolog NN sortbestämmer dina äpplen Ta med 5 fina äpplen av vaje sort. Kostnad 20:-/äppelsort. Kl 12-15 finns NN från UmeMust på plats med information, provsmakning och försäljning av äppelmust. Demonstration av litet handdrivet musteri NN från Norrträdgård visar hur du beskär ditt äppelträd Information och demonstration av …	2016-09-26 11:01:42	1877		2	20	1	1	1	Y	3	2	1	NO	4	3	2
Supermarket	1	VÄLKOMMEN SJUNG med oss i kören "TILLTRO" Vi övar måndagar jämna veckor (dock inte v.38, då är det torsdagen som gäller) Med START den 5/9 Kl.18:30-20.30 i församlingsgården i Bredbyn - källarplan Inför vår "JULSTÄMNING" den 16/12 kl.19:00 bjuder vi in den som vill att vara med och SJUNGA MED OSS på just den. Övning: måndagar jämna veckor 18:30-21:00 (3/10, 17/10, 31/10, 14/11, 28/11 samt tor. 15…	2016-09-26 11:04:21	1877		1	20	1	2	1	Y	3	3	1	NO	6	1	2
Supermarket	1	Svenska kyrkan ANUNDSJÖ FÖRSAMLING Hej! Vi i Anundsjö församling vill erbjuda barn som är födda under 2011 att gå på Kyrkis i Bredbyn. Vi träffas i församlingsgården, måndagar mellan kl. 9.00 och 10.30 START: Måndagen den 19 september Anmälan vill vi ha så snart som möjligt!! Max 12 barn i gruppen @@@ ### Ring gärna om ni har frågor! Hälsar ledarna NN och NN	2016-09-26 11:14:41	1877		1	20	1	2	1	Y	2	1	1	NO	6	1	1
Public Place	1	SLUSK – Länsungdomskören Den här kören står sällan stilla när de sjunger utan använder hela scenen och koreograferar sina konserter. Sedan starten 2012 har kören bl a arbetat med Romeo & Juliakören från Dramaten, Stockholm. 2015 åkte hela kören till Piteå på ett stort musikläger och 1 januari 2016 sjöng dom på Kulturfestivalen i Sundsvall. - Sedan starten har kören dels turnerat med låtar av Simo…	2016-09-26 11:04:51	1877		1	20	1	2	1	Y	3	1	1	YES	6	1	1
Public Place	1	PRO ANUNDSJÖ STAVGÅNG TISDAGA KL 930 SAMLING BRANDSTATIONEN LEDARE NN tel ### BOULE OLYMPIA TORSDAGAR KL 1000	2016-09-26 11:05:18	1877		2	20	1	1	1	N	1	1	1	NO	6	1	1
Other	1	Endligt svensk lag måste du ha fyllt 18 år och kunna visa legitimation för att köpa tobak, alkohol och receptfria läkemedel (gäller även för spel). According to Swedish law you must be 18 years old and able to show proof of identification in order to buy tobacco, alcohol and prescription free drugs (also applies to gambling). Sida Sharciga Iswiidhku qeexayo, waa in aad 18 jir ka waynaataa oo wali…	2016-09-26 11:05:30	1877		2	24	2	1	1	Y	3	2	3	NO	5	2	2
Public Place	1	Kultur och cirklar i samarbete med Bilda.	2016-09-26 11:07:23	1877		1	24	8	2	1	Y	2	1	1	NO	5	1	2
Supermarket	1	YOGAHÄLSAN LUNCHYOGA Ett underbart sätt att starta helgen på! Gratis Prova på fredag 26 Augusti kl 12.00-13.00 Kursstart fredag 16 september kl 12.00-13.00 8ggr 1200kr För info om alla våra övriga kurser, se yogahalsan.com Anmälan och frågor: @@@ eller ### Varmt välkommen!	2016-09-26 11:09:48	1877		1	3	2	2	1	Y	2	2	1	YES	6	2	2
Public Place	1	Olika, lika, alla unika COME TOGETHER SLUSK - Musik Västernorrlands länsungdomskör	2016-09-26 11:10:36	1877		1	20	1	2	3	Y	3	2	2	NO	5	1	2
Supermarket	2	Ägare till katt sökes ! Denna katt söker sin ägare, är mager, tovig och smutsig och har gått ute en längre tid. Är det din katt eller vet du vem som äger den, ring Länsyrelsen ### telefontid vardagar mellan 9-12	2016-09-26 11:13:13	1877		1	9	3	1	1	Y	2	2	1	NO	1	2	2
Public Place	1	BÖRJA SPELA HOCKEY! Vi söker killar och tjejer födda 2008 till 2010 som vill vara med vårt glada gäng och spela eller bara testa på att spela hockey. Vi vet att det finns massor av hockeysugna killar och tjejer som drömmer om att få spela hockey och uppleva gemenskapen och pulsen både på och utanför isen. Nu i höst startar vi upp nya grupper och vi välkomnar alla till gemenskapen. Läs mer och anm…	2016-09-26 11:12:05	1877		2	20	1	2	1	N	3	2	1	YES	6	1	2
Public Place	1	Mötley Crüe ONCE IN A LIFETIME EXPERIENCE FIRST EVER MÖTLEY CRÜE EXHIBITION 17 th September – 18 th November Museum & Artgallery, Örnsköldsvik, Sweden MCRUELOYALTY	2016-09-26 11:14:20	1877		2	20	1	2	3	Y	3	2	1	NO	4	2	2
Public Place	1	Ruotsinsuomalainen toiminta, 2016 17/1 klo 14.00 Messu, Örnsköldsviikin kirkko. Kahvitarjoilu. 24/3 klo 17.00 Kiirastorstaimessu, Örnsköldsviikin kirkko. 8/5 klo 16.00 Äitienpaivän vietto, Örnsköldsviikin seurakuntakoti. Hartaus. Kahvitarjoilu. 11/9 klo 14.00 Messu, Örnsköldsviikin kirkko. Kahvitarjoilu. 6/12 klo 18.30 Suomen itsenäisyyspäivän vietto ja Kauneimmat joululaulut, Öviikin seurakuntak…	2016-09-26 11:18:44	1877		1	17	1	2	2	Y	3	2	2	NO	1	1	2
Public Place	1	[KV CAROLI] Östergatan 12, Malmö POP-UP Galleri Lördag 24 september 2016: Gallerinatt, öppet kl 18-24. 25-29 sept öppet dagligen kl 11-18 NN, måleri NN, mixed media NN, måleri NN, måleri NN, måleri NN, måleri NN, möbler i trompe-l òeil NN, keramik NN, keramik NN, måleri Galleri Engleson www.galleriengleson.com MALMÖ GALLERINATT LÖRDAG 24 SEPTEMBER KL. 18-24	2016-09-26 11:18:57	1860		1	20	2	2	1	Y	3	1	1	YES	6	2	2
Public Place	1	Folkets Hus och Parker RIKSTEATERN äta själv Molière Ensemblem FRÅN 2 ÅR EN FÖRESTÄLLNING FÖR DE ALLRA YNGSTA. OM KONSTEN ATT KUNNA NÅGOT ALLDELES SJÄLV vipresenterar.se GNISTAN 19/10 KL:18,00	2016-09-26 11:19:46	1877		1	20	1	2	1	Y	3	4	1	YES	4	1	2
Public Place	1	En föreställning med fäbod och vallmusik som tema LÅNGT BORT I SKOGEN, LÅNGT BORT I TIDEN SÖN 25 sept kl 15:00 Folkets Hus, Gnistan Gullänget Entré: 50:- Arr. Folkets Hus Gullänget	2016-09-26 11:24:20	1877		1	20	1	2	1	Y	3	2	1	NO	4	1	2
Public Place	3	VI MÖTS PÅ MITTEN MUSIK KOMIK TEATER Av och med Stina Joza och Jens Nilsson FOLKAN ÖRNSKÖLDSVIK 9–10 SEPTEMBER Tid 19:00. Pris: 225 kr. Förköp: Turistbyrån, Ticnet.se, Folkan Örnsköldsvik.	2016-09-26 11:22:11	1877		2	20	2	2	1	Y	3	2	1	YES	6	3	2
Public Place	1	SUOMENKIELINEN LÄHIMMÄINEN ### PALVELEVA PUHELIN JOKA ILTA KELLO 21-24 Svenska kyrkans finska telefonjour Öppet varje kväll 21-24 Palvelevassa puhelimessa voit keskustella elämäntilanteestasi kertomatta nimeäsi tai asuinpaikkaasi. Päivystäjä on vaitiolovelvollinen, tehtäväänsä koulutettu vapaaehtoinen. Palveleva puhelin päivystöö joka ilta kello 21-24. Svenska kyrkans finska telefonjour, Palvelev…	2016-09-26 11:22:15	1877		1	24	1	1	2	Y	3	2	2	NO	1	1	2
Library	1	Stolpjakten Eda friskvård med karta Välkommen till stolpjakten 2016 Från 14 maj till 30 september finns möjlighet att leta stolpar i Charlottenberg, Koppom och Åmotsfors. Din uppgift är att leta reda på så många stolpar som möjligt. På varje karta finns 30 stolpar i olika svårighetsgrad. Du har möjlighet att vinna fina priser och till din hjälp har du en karta där alla stolpar är markerade. Regis…	2016-09-26 11:46:13	1914		1	20	1	2	1	N	3	2	1	YES	2	1	2
Public Place	1	SPF SENIORERNA ANUNDSJÖ KOM MED OSS september - december 2016 SEPTEMBER Tisdag 6 Musikcafé med NN och NN, kl. 13.15 Träffpunkten Sörgården. Söndag 11 Dagsresa till Tegs kyrka m. kyrkkaffe, vi gör också ett besök på IKEA Umeå. Middag äter vi på Levar Hotell. Pris: 550 kr. Tis-ons 27-28 SPF Seniorresa med Cinderella till Åland (enbart för medlemmar) Pris: 360 kr. OKTOBER Onsdag 12 Medlemsträff kl. …	2016-09-26 11:47:12	1877		2	20	1	1	1	Y	3	1	1	YES	6	1	1
Public Place	1	Boksläpp "Laget som aldrig dog" NN avslöjar okända sanningar om Leksands IF:s idrottsmirakel Borlänge bibliotek Tisdag 27/9 kl. 18.00	2016-09-26 11:56:34	1897		2	20	1	1	1	Y	3	2	1	NO	4	3	2
Supermarket	1	PRO AVESTA Dagskryssning till Mariehamn från Kapellskär 17 oktober Ombord på denna avresa är det Café Rosella, där Ulf Elfving är cafévärd, och har bjudit in Lasse Berghagen som gäst i soffan. Den folkkär artisten kommer att bli intervjuad i Funkar Club kl 13.30. Bussen kommer att vara med ombord, och resenärerna får åka med bussen på och av Rosella. Pris 264:- /person I priset ingår: • Dagskryss…	2016-09-26 11:56:49	1872		1	3	2	2	1	Y	3	2	1	NO	1	1	2
Other	1	FOTBOLL Örnvallen Lördagen den 24/9 kl. 16.00 DIV 7 ÅRJÄNG 2 IF ÖRNEN U. Entré: 30:- Fotbollsektionen	2016-09-26 12:02:27	1914		2	18	1	1	1	Y	4	1	1	NO	5	3	1
Public Place	1	FOTBOLL Örnvallen SÖNdagen den 25/9 kl. 16,00 DIV 5 ROTTNEROS IK IF ÖRNEN Entré: 40:- Fotbollsektionen	2016-09-26 12:03:14	1914		2	18	1	2	1	Y	4	1	1	NO	5	3	1
Public Place	2	FOTBOLL Örnvallen Lördagen den 24/9 kl. 16.00 DIV 7 ÅRJÄNG 2 IF ÖRNEN U. Entré: 30:- Fotbollsektionen	2016-09-26 12:04:16	1914		2	18	1	1	1	Y	4	1	1	NO	5	3	1
Public Place	1	DYSLEXIVECKAN 1-6 oktober på biblioteken i Borlänge och Falun Tema: Hitta ditt sätt att läsa Aktiviteter på Falu stadsbibliotek Under hela veckan pågår Legimus Drop in med informationsbord från Dyslexiförbundet ocg ABF och Library Press Reader drop in. LÖRDAG 1/10 • Teater av och med NN - Falu stadsbibliotek kl. 12.00 - 12.40 NN spelar föreställningen "Jag badar". Det är en djupt personlig, både …	2016-09-26 12:05:46	1897		2	20	1	2	1	Y	3	3	1	NO	4	3	2
School	1	Läraraförbundet SVERIGES STÖRSTA LÄRARORGANISATION	2016-09-26 12:06:49	1914		1	24	1	1	1	Y	3	3	1	NO	5	4	1
Public Place	1	PROVA PÅ LINEDANCE Onsdagen 31 Augusti kl 18 Fregatten i Stenungsund Fri entré Välkomna Best of the West Linedancers	2016-09-26 12:09:11	1934		2	20	1	2	1	Y	2	1	1	NO	4	3	2
School	1	### Det här numret går till Gunnarsbyskolans LIKABEHANDLINGSTELEFON. Du kan vara anonym. Ring eller skicka sms dit om du har något att berätta.	2016-09-26 12:09:21	1914	1	1	24	8	1	1	Y	2	1	1	NO	1	1	2
Public Place	1	NN - en väg genom boken för den som behöver Författarbesök med NN Falu stadsbibliotek 1/10 kl 13.00 Borlänge bibliotek 1/10 kl 15.00 Fri entré NN är författare och krönikör. Han har även bearbetat "En man som heter Ove" till Lättläst. Föreläsningen är en del av Dyslexiveckan i Falun och Borlänge. Arrangemang: Falu stadsbibliotek, Borlänge bibliotek, ABF Dalarna	2016-09-26 12:12:00	1897		2	12	1	2	1	Y	3	2	1	NO	4	3	2
Public Place	1	Whelan's Trädfällning och Trädvård www.treeworker.se ### Hitta oss på Facebook SAF SVERIGES ARBORISTFÖRBUND Member ISA	2016-09-26 12:12:29	1934		2	3	2	1	1	Y	3	2	1	YES	6	3	2
Private Place	1	JUL PÅ JORDHAMMAR Klassiskt julbord med inspiration från Bohuslän JULBORD 26 Nov – 18 Dec TORSDAGAR kl. 19 595:- 1/12, 8/12, 15/12 FREDAGAR kl. 19 595:- 2/12, 9/12, 16/12 LÖRDAGAR kl. 13 & 18 595:- 26/11, 3/12, 10/12, 17/12 SÖNDAGAR kl. 13 & 17 495:- 27/11 4/12 11/12 18/12 Sällskap upp till 220 pers RESTAURANG Jordhammars HERRGÅRD anno1855 BOENDE, FEST & BRÖLLOP ### www.jordhammarsherrgard.se	2016-09-26 12:12:37	1934		2	3	2	2	1	Y	3	5	1	YES	6	3	2
School	1	Välkomna på fika Kommunal Eda bjuder på fika. 29 september mellan klockan 11:00 - 15:00 Ni hittar oss på Ame och i konferensrummet vid Älvgården Åmotfors.	2016-09-26 12:14:25	1914	1	1	20	4	2	1	Y	2	2	1	NO	4	1	2
School	1	Skolbiblioteket mån: 8-15 tis: 8-15 ons: 8-15 tors: 8-13.30 fre: 8-15	2016-09-26 12:14:58	1914		1	24	8	2	1	Y	2	3	1	NO	5	1	2
School	1	Missat ersättning? Du är försäkrad i jobbet vid arbetsskada, sjukdom och dödsfall! Försäkringsinformatör: PERSONALAVDELNINGEN • NN ### • NN ### Kommunal • NN ###	2016-09-26 12:15:10	1914		1	24		1	1	Y	4	1	1	NO	1	1	2
Public Place	1	HÖST på Jordhammars Herrgård SEPTEMBER Fre 23 MUSIKQUIZZ med RONNY SVENSSON från Filmkrönikan Max 6 i varje lag 195:– inkl. Varmrätt OKTOBER Fre 7 FAMILJEAFTERWORK Trubadurerna Lennart & Martin Trollkarl Barnbuffé kl1 7-23 Fre 14 AFTERWORK med BODHISATTVA Buffé och 60-70-talsmusik 195:– kl 17-23 Lör 15 VILTWEEKEND från kl 18 Fre 28 MUSIKQUIZZ med RONNY SVENSSON från Filmkrönikan Max 6 i varje lag…	2016-09-26 12:26:40	1934		2	3	2	2	1	Y	3	5	1	YES	6	3	2
Public Place	1	BÄSTKUSTENS AUKTIONSTJÄNST köper kontant: – Dödsbon – – Antika & gamla föremål – – Hela & delar av hem – Ombesörjer auktioner och städning Ring ### ###	2016-09-26 12:29:02	1934		2	2	2	1	1	Y	3	2	1	NO	1	3	2
Public Place	1	NN, Foton Detta är min första egna utställning. Jag, en hobbyfotograf från Kode, söker motiv som känns nya, en bild som ingen tagit före mig. Försöker unvika varianter på bilder som redan finns... Fotar helst i svartvitt, gärna människor i olika miljöer. 3 - 30 sept Vernissage lördag 3 Sept kl 10 – 15 Därefter öppet torsdagar och 15 -18 lördagar 10 – 15, i Faster Bertas stuga som ligger strax nor…	2016-09-26 12:32:11	1934		1	20	1	2	1	Y	2	2	1	YES	6	1	1
Public Place	1	OSLO STRYKEKVARTETT framför verk av Ludwig van Beethoven och Knut Nystedt Geir Inge Lotsberg, violin Liv Hilde Klokk, violin Are Sandbakke, viola Øystein Sonstand, cello En av Nordens mest efterfrågade kammarmusikensembler, 25-årsjubilerande Oslo Strykekvartett, kommer till Stenungsund! Kvartetten har spelat in samtliga stråkkvartetter av Beethoven, Greig och Carl Nielsens och varit med om att åt…	2016-09-26 12:34:15	1934		2	20	1	2	1	Y	3	2	1	YES	6	3	2
Public Place	1	Hundkurser Koppel- och inkallning Start: 31/8 onsdag. Vid Spekeröd Bygdegård. 4 x 2 tim. Pris 960 kr. Aktiva promenader Start: 4/9 söndag. Stenungsund 2 x 2 tim pris 440 kr. Rallylydnad nybörjare Start: 25/9 söndag, Spekeröd 5 x 2 tim. Pris 1080 kr. Jag heter NN och är utbildad Hundinstruktör samt Specialicerad Hundpsykolog. Jag arbetar med positiva, motivations- och belöningsbaserade tränigsmeto…	2016-09-26 12:37:53	1934		2	3	2	2	1	Y	2	1	1	YES	6	1	2
Public Place	1	LYCKORNA BRYGGA PRESENTERAR STOLT EN GLITTRANDE SKÄRGÅRDSJUL MED SHOW SISTERS TJEJERNA SOM TAGIT VÄSTKUSTEN MED STORM LYCKORNA BRYGGA ETABL 1877 RESTAURANG & BAR Nov 25, 26. 595:- Dec 2, 3, 9, 10, 15, 16, 17 Julbord utan show kl. 14 sönd 11 Dec 445:- BOKA NU PÅ: @@@ TEL: ###	2016-09-26 12:38:54	1934		2	20	2	2	1	Y	3	2	1	NO	6	3	2
Public Place	2	itrim Itrim - mer än bara träning Med Itrim når du snabba resultat och du behåller formen, även i framtiden. Shapemedlem För dig som vill gå ner i vikt och behålla den resten av ditt liv. Här får du en personlig hälsocoach och föreläsningar där du får jobba med att hitta balansen i ditt liv med allt från kost till sömn till träning. Focusmedlem För dig som vill ta träningen till en ny nivå med hj…	2016-09-26 15:02:10	1866		2	3	2	2	1	Y	3	2	1	YES	6	3	2
Public Place	1	JAZZ KLUBB SYD Jazzklubb Syd i Farsta presenterar ...JAZZ I LADAN... Torsdag 22 september 2016, kl 19.30 NN gitarr NN piano NN bas NN trummor NN NN NN NN Välkomna! Tompas Bar öppnar ca kl 18.30 Ladan, Farsta gård, Farstaängsvägen 16-22 (buss 185V från Farsta C, Hpl Farsta IP) Entré 200:-, Medlemmar 150:-, Under 20 år fri entré	2016-09-26 15:03:22	1866		2	20	1	2	1	Y	3	2	1	NO	4	3	2
Public Place	3	KONSERT En hyllning till ABBA Vol. 2 KRISTINEHALLEN 19/11 KL 15&19 BILJETTER:WWW.VISITSODRADALARNA.SE Dirigent/kapellmästare: NN * Kontrabas: NN * Gitarr: NN och NN * Flygel: NN * Slagverk. NN * NN * Violin: NN * Tvärflöjt: NN	2016-09-26 18:28:20	1897		2	20	2	2	1	Y	3	2	1	YES	2	3	2
Public Place	2	LOPPIS På Lilltorpet Fre 7/10 12-17 Lör 8/10 9-15 Sön 9/10 10-12 VÄLKOMNA	2016-09-26 18:33:05	1897		2	2		2	1	Y	2	1	1	NO	4	3	1
Public Place	1	Hantverkscafé vid Falu gruva Vi träffas en måndag i månaden. 5 september, 3 oktober, 7 november, 5 december Tid: Kl. 18 -21 Plats: Gruvgatan 53 Kostnad 40 kr/ gång inkl fika Varmt välkommen! Hantverksgruppen Kopparträdet butik, öppna ateljéer, hantverk Studie förbundet Vuxenskolan	2016-09-26 18:46:18	1897		2	20	1	2	1	Y	3	2	1	NO	4	1	2
Public Place	1	Halmslöjdskurs Vi träffas tre gånger och lär oss göra halmstjärnor, halmdockor och havrekors som blir fina julprydnader. Ledare: NN Start: Tisdag 3 november, 3 träffar Kostnad: 850 kr Lokal: SV i Falun, Åsgatan 59 Välkommen med din anmälan redan idag! Plats för nytänkande Anmälan www.sv.se/dalarna - eller om anmälan över hemsida inte är möjlig - till Studieförbundet Vuxenskolan/Falun ### Studiefö…	2016-09-26 18:55:20	1897		2	20	1	2	1	Y	3	2	1	YES	6	1	2
Public Place	1	Hockeybutiken Just nu 50% på massor av hockeyprylar! Butiken med breda sortiment från CCM, EASTON, BAUER, REEBOK Vi säljer även Sport - Jakt - Cykel - Fritidskläder - Skor mm. Vard 1000-1800 lörd 1000-1500 • www.bugsport.se BUG SPORT CHARLOTTENBERG TEL. ###	2016-09-26 20:05:24	1914		1	2	2	2	1	Y	3	2	1	YES	6	1	2
Supermarket	1	stor & LITEN stor & LITEN Mötesplats ....för föräldrar och barn Drop -in FIKA - till självkostnad ONSDAGAR från 09.00 -11.30 PLATS: PINGSTKYRKAN Överhörnäs ingång från baksidan www.pingstoverhornas.se 21/9 START 21/9	2016-09-27 06:24:11	1852		2	13	1	2	1	Y	3	2	1	YES	6		2
School	2	Förbud mot nötter, jordnötter, mandel och sesam Många barn och ungdomar är allergiska mot nötter, jordnötter, mandel eller sesam. En person som är svårt allergisk kan får en livshotande allergichock om hon av misstag får i sig detta. För att alla ska kunna känna sig trygga har vi därför infört ett fullständigt förbud mot nötter, jordnötter, mandel och sesam på skolans område. Förbudet gäller vid …	2016-09-27 06:28:05	1852	1	2	24	8	1	1	Y	2	2	1	NO	5	1	2
Public Place	1	PRO SJÄLEVAD MÅNADSMÖTE TISDAG 20 sept. kl 13.00 På Församlingshemmet. Ur programmet: Mötesförhandlingar Västansjökören underhåller VÄLKOMMEN!	2016-09-27 06:29:27	1852		2	13	1	2	1	Y	2	3	1	NO	5	2	1
Public Place	1	Brukskyrkan Dagträff m sopplunch Fredagar 11-14 23/9 30/9 7/10 14/10 21/10 28/10 11/11 18/11 25/11 2/12 I samarr med Sensus NN ### Svenska kyrkan	2016-09-27 06:29:47	1852		2	20	1	2	1	Y	2	5	1	NO	1	3	2
Public Place	1	Självfallet Herr- & damfrisör Välkommen in till oss på Självfallet! Vi erbjuder allt från klipp, färg och permanent till brynfärg och vaxning. Salongen hittar du på Första Långgatan 13 i Övik. Boka din tid på tel. ### eller klicka in på www.sjalvfalletovik.se Har ni några funderingar?Tveka inte att ringa! /NN, NN och NN	2016-09-27 06:30:07	1852		2	3	2	2	1	Y	2	2	1	YES	6	3	2
Public Place	2	LÖRDAGSDANS Jontez ISLADAN Bjästa 140:- PAUSFIKA INGÅR I PRISET OBS ! LÖRDAG 17 sept kl.19-23 VÄLKOMMEN NÄTRAGILLET www.natragillet.com	2016-09-27 06:35:25	1852		2	20	2	2	1	Y	3	2	1	YES	2	3	2
Public Place	1	Pizzeria Milano Krokstavägen 37, Gullänget ### Välkommen!	2016-09-27 06:38:25	1852		2	3	2	2	1	Y	3	1	1	NO	6	4	2
Public Place	3	Äpplets dag Lördag den 24 september kl. 10-15 på torget i Örnsköldsvik. Pomolog NN sortbestämmer dina äpplen Ta med 5 fina äpplen av vaje sort. Kostnad 20:-/äppelsort. Kl 12-15 finns NN från UmeMust på plats med information, provsmakning och försäljning av äppelmust. Demonstration av litet handdrivet musteri NN från Norrträdgård visar hur du beskär ditt äppelträd Information och demonstration av …	2016-09-27 06:30:47	1852		2	20	1	2	1	Y	3	2	1	NO	4		2
Public Place	1	Du får vård på något av våra tre sjukhus Du kan få resa När du får sjukhusvård kan du ibland få resa till ett annat sjukhus i vårt län än det som ligger närmast dig. Det beror på att vi anpassar oss till var vi har bäst möjlighet att ta hand om dig. Innan du reser Vårt beslut om att just du behöver resa sker alltid efter en medicinsk bedömning. Du får alltid information om eventuell resa av behan…	2016-09-27 06:30:50	1852		1	24	8	1	1	Y	3	2	1	YES	2	1	2
Public Place	1	CENTRUMKYRKAN BJÄSTA Söndag 25 september kl 11.00 Gudstjänst NN predikar Söndagsskola Fika & gemenskap VARMT VÄLKOMNA! Centrumkyrkan Bjästa, Nätragatan 23, Bjästa www.centrumkyrkan.se	2016-09-27 06:31:40	1852		2	17	1	1	1	Y	2	1	1	YES	6	3	1
Public Place	1	Nätra Norrflärke Röda-korskrets Musik Café i Viks ordensHus Fredag den 16 sept Kl: 19.00 Underhållning: TJÄRNMYRBERGARN MATLOTTERI • Kaffe och Bakelse Samverkan med NBV. RING NN ### ELLER NN ###	2016-09-27 06:33:49	1852		2	20	1	2	1	Y	4	1	1	NO	1	1	2
Public Place	2	Fynda... ...i vår Second Hand-butik. Genom att handla stödjer du biståndsinsatser i bl.a Albanien och Indien. Öppet Tor 13-16, Lör 10-14 Svedjeholmskyrkans BISTÅNDSCENTER Brogatan 105 Välkommen!	2016-09-27 06:36:09	1852		2	2	1	2	1	Y	3	3	1	NO	4	3	2
Public Place	1	MOTOR SHOPPEN Återförsäljare till Stiga, Mtd, Club cadet Vi utför service och reparationer på snöslungor, gräsklippare, mopeder, cyklar, mm. Vi köper även in beg maskiner Kontakta gärna oss på ###	2016-09-27 06:47:07	1852		2	3	2	1	1	Y	2	2	1	NO	1	3	2
Public Place	1	Äktenskaps kursen ...ett tillfälle att stärka och bygga upp er relation inför framtiden. Äktenskapskursens recept skön atmosfär + god middag användbara tal + egen samtalstid INGA GRUPPARBETEN! Kurs startar i din närhet: Kursstart 6okt För anmälan. se www.svedjeholmskyrkan.se	2016-09-27 06:52:58	1852		2	20	1	1	1	Y	4	2	1	YES	2	3	2
Public Place	1	VARNING FÖR CYKLISTER 11/9 Söndag 11 spetrmber, med start klockan 10 och ett par timmar framåt, arrangerar OK Nolaskogarna en tävling i mountainbikeorientering (MTB-O) på Skyttis. De tävlande kommer att köra på både stigar och rullskidbanor, även mot åkriktningen, och vi ber därför rullskidåkare och övriga motionärer i området att vara extra uppmärksamma då cyklisterna oväntat kan dyka upp. Dessa…	2016-09-27 06:36:45	1852		2	24	1	1	1	Y	3	1	1	NO	5	3	2
Public Place	1	FISKEFÖRBUD 1 SEPT- 31 OKT Gäller Nätraälven från Fors till fiskegränsen i havet. I Åfjärden ned till Saras brygga är fiske tillåtet.	2016-09-27 06:37:51	1852		2	24		1	1	Y	2	1	1	NO	5	3	1
Public Place	1	BABYSIM -Tjena! Det ryktades på stan att ABF har Ö-viks bästa babysimskurser. Vi gick med i kurser och vet du, vi har jätteroligt, så det är bara att du hänger på du med! Vi har ny terminstart lördag den 17 september Anmäld dig redan idag Vill du veta mer så ring ABF ### Det gjorde min morsa och det var kanonbra. ABF VÄSTERNORRLAND	2016-09-27 06:40:39	1852		1	20	1	2	1	Y	3	2	1	NO	1	1	2
Public Place	1	Konstlotteri 2016 Vinstdragning. Nätra Hembygdsgård i Bjästa. Onsdag 5 oktober kl 18.00 Den som är närvarande vid dragningen har möjlighet att välja annan vinst än den som står på tur i vinstlistan. VÄLKOMNA! NÄTRA HEMBYGDSFÖRENING Kulturbroar BJÄSTA KONSTFÖRENING	2016-09-27 06:44:53	1852		2	20	1	1	1	Y	3	1	1	NO	4	3	2
Public Place	1	BERÄTTARKVÄLL Köpmanholmens Bruksmuseum. Tisdag 18 oktober kl 18.30 – ca 20.30 Kvällens tema: SOLGÅRDEN Vi uppmärksammar att det i år är 70 år sedan SOLGÅRDEN invigdes med pompa och ståt. Berättelser och bilder från Solgården. Välkommen med dina egna berättelser! Fri entré Fika NÄTRA HEMBYGDSFÖRENING Kulturbroar Studieförbundet Vuxenskolan	2016-09-27 06:50:10	1852		2	20	1	1	1	Y	3	2	1	NO	4	3	2
Public Place	3	TRAIL ÖVIK 17 SEPTEMBER 2016 1,7KM 3,9KM 6KM 12KM Trailövik – för alla. Äkta trailglädje! Riktigt kul och utmanande. Trailövik är en fantastisk upplevelse. Trailövik består av fyra olika bansträckningar: Minitrail 1,7 km för de yngre upp till 10 år; Motion 3,9 km där sträckan går längs elljusspåret i Själevad; 6 km som går på stigar och elljusspår i Själevad samt 12km som är lite tuffare både vad…	2016-09-27 06:45:34	1852		2	18	1	1	1	Y	3	5	1	YES	6	3	2
Supermarket	1	YOGAHÄLSAN HATHAYOGA Prova den klassiska Hathayyogan anpassasd efter årstid enligt Ayurvediska principer! Gratis prova på Onsdag 31/8 kl 17.30-18.30 - Mjuk Onsdag 31/8 kl 19.00-20.00 - Fysisk Kursstart 17.30-18.40 Mjuk, start 7 september, 13ggr 1850kr 19.00-20.10 Fysisk, start 7 spetember, 13ggr 1850kr Mer info: www.yogahalsan.com @@@ ### Hjärtligt välkommen! /NN	2016-09-27 06:45:57	1852		1	3	2	2	1	Y	2	2	1	YES	6		2
Public Place	2	NYHET! STARTAR VECKA 37 TORSDAGAR MELLAN 18:30-19:30 ChiBall Det bästa från Yogan, Taili, QiGong & Pilates. I handen har man en mjuk aromaboll till hjälp med både balans och självmassage. Torsdagar 18:30–19:30 på Församlingshemmet Örnsköldsvik 1300:- inkl. boll och matta Anmälan till Korpen Tel: ### eller e-post: @@@ KORPEN Tjänstemannagatan 3 892 50 Domsjö	2016-09-27 06:50:11	1852		1	18	2	1	1	Y	2	2	1	NO	6	1	2
School	1	ForslundaGymnasiet Djur - och lantbrukskollo Går du i årskurs 7 eller 8 och gillar djur? Ja, då är du välkommen att delta i Lantbrukskollo eller Djurkollo. Vi övernattar i militärtält (blir det dåligt väder sover vi inomhus), äter god mat, träffar djuren, får nya kompisar och kanske nya utmaningar. Under Lantbrukskollot får du lära dig om lantbruksdjur, maskiner och hur livet på en lantgård kan v…	2016-09-27 06:50:49	1885		1	20	8	2	1	Y	3	2	1	YES	2	1	2
Public Place	1	BOKSTATION Läs och lämna vidare på någon av Bokstationerna! Besök också ditt lokala bibliotek! bibliotek.ornskoldsvik.se minabibliotek.se. Bokstationer finns på tågstationerna i: Örnsköldsvik, Husum, Nordmaling, Hörnefors, Umeå Östra & Vindeln. Vi finns på Facebook! Facebook.com/Bokstationer. Ett samarbetsprojekt mellan biblioteken i Örnsköldvik och Umeåregionen för att främja läsning i alla åldr…	2016-09-27 06:51:44	1852		1	24	1	1	1	Y	3	2	1	YES	6		2
School	1	UMEÅ FLOORBALL™ FESTIVAL 2016 - THE CAPITAL OF FLOORBALL THE FIFTH EDITION 30 SEPTEMBER 2 OKTOBER	2016-09-27 06:56:49	1885		1	18	1	2	3	Y	3	2	2	NO	5	1	2
School	1	Åk 8 Broderi Harry Potter	2016-09-27 07:03:45	1885		1	24	8	2	1	Y	2	2	1	NO	5	1	2
School	1	Fingeravtrycksskåp För alla glömska elever Ett skåp gjort av trä som gör så att du slipper komma ihåg nyckel och kod	2016-09-27 07:09:57	1885		1	24	8	2	1	Y	2	2	1	NO	5		2
Public Place	1	Örnsköldsviks STADSLOPP 10 SEPTEMBER 2016 Klasser: 10 KM (HERRAR &DAMER) 5 KM (HERRAR& DAMER) 5 KM (UPP TILL 16 / KILLAR & TJEJER) Motionslopp med eller utan tidtagning TRÖJA till alla deltagare Anmäl dig individuellt, tävla tillsammans med arbetskompisar, kompisgäng eller bara ta en promenad och upplev den häftiga stämningen på gator och torg. Start och målgång inne i fjällräven Center Musik, un…	2016-09-27 07:14:23	1852		2	18	1	1	1	Y	3	2	1	YES	2	3	2
Public Place	1	TORSÖ HÄSTSKJUTS Turer med passagerare på småvägar på Torsö, c:a en timme, 500:- Även skjuts med gammaldags finvagn på andra platser. Tid efter överenskommelse. NN ###	2016-09-27 08:17:37	1948		2	3	7	2	1	Y	1	2	1	NO	1	1	2
Public Place	1	Välkomna till Torsö Camping mitt på ön vid Bygdegården	2016-09-29 07:26:41	1948		2	24	1	2	1	Y	3	4	1	NO	5	4	2
Public Place	1	Tipspromenader på Torsö hösten 2016 Torsö Bygdegårds- och idrottsförrening anordnar traditionsenligt tipspromenader i samverkan med Torsö Skärgårdsskola. Promenaderna utgår från Skärgårdsskolan Söndagar från och med den 18/9 till den 23/10 Starttid 09.30-11.00 Startkort 10:- Bingobricka 5:- Lott 2:- Vuxen och Barnfrågor Om du går minst fyra av sex promenader kan du delta i utlottning av Landlotte…	2016-09-29 07:32:45	1948		2	19	1	2	1	Y	2	4	1	NO	4	1	2
Public Place	1	Loppis 10 september Gympasalen på Torsö Skärgårdsskola Klockan 10:00 – 14:00 Vill du sälja? Hör av dig till NN ###	2016-09-29 07:37:27	1948		2	2		1	1	Y	2	3	1	NO	1	3	2
	1	TORSÖ Skärgårdsskola	2016-09-29 07:40:14	1948			24		2	1	Y	3		1	NO	5		2
Public Place	1	AHÅS VASSRÖJNING & SJÖGRÄVNING AB KRISTINEHAMN • Tel. ###, ### www.ahas.s.se	2016-09-29 07:47:21	1948		2	3	2	1	1	Y	3	1	1	YES	6	4	2
	1	Skräddaretorps Natur Camping Torsö Nu mjukstartar vi med några campingplatser. Vi har el, dricksvatten och utedass. Ett underbart långgrunt bad med fin sandbotten. Välkommen! Tel ###, Mob ###. Kör mot Dillö ca 7 km. Skylt Skräddaretorp höger.	2016-09-29 08:13:16	1948			3	1	2	1	Y	2	4	1	NO	1	3	1
	1	Konst i Mariestad 23-25 september 2016 Välkommen till den årliga konsthelgen i Mariestad sista helgen i september. Temat för utomhuskonsten i Esplanaden är GLÄDJE och presenteras i ett 50-tal verk. Samlingsutställning – enskilda verk i olika lokaler runt om i staden. Öppettider för helgen Fredag kl. 18.00-22.00 Lördag kl. 10.00-16.00 Söndag kl. 11.00-16.00 Allekonst Mariestad www.allekonstmariest…	2016-09-29 08:33:47	1948			20	1	2	1	Y	3	2	1	YES	6		2
	1	AFTER SAIL FÖRST I SKARABORG TRUBADUR - LOW DOWNS FREDAGAR: 15:00 - 17:30 DATUM: JULI 8, 15, 22, 29 AUG: 5	2016-09-29 08:34:25	1948			20	2	2	1	Y	3	2	1	NO	4		2
Public Place	1	HT BYGG AB TORSÖ ### ### FÖNSTERSPECIALISTER som utför det mesta inom BYGG NN ### NN ### Vi marknadsför även www.calidafonster.se Calida Fönster ab Kompositfönster Trä, Trä/aluminium	2016-09-27 08:21:45	1948		2	3	2	1	1	Y	3	1	1	YES	6	3	1
Public Place	1	KORPEN MARIESTAD TORSÖ BIF CYKELORIENTERING KONTROLL NR 5 BOKSTAV M Korpens cykelorientering på Torsö startar den 11 maj och pågår till och med 30 september. Kontroll 1 - 6 finns uppsatta under perioden 11 maj - 30 september. Startkort och Karta finns att köpa hos Team Sportia, Korpen i Centrum på Nygatan 20 samt på vår kansil på Höstvägen 2. PRIS 30:- Ifyllt startkort inlämnas till Korpens kansi…	2016-09-29 07:47:34	1948		2	20	1	2	1	N	2	3	1	NO	5	3	1
Public Place	1	Levereras som fotobok, inramad bild, canvas .... Jag fotograferar barn, barnbarn och andra små troll i egen fotostudio på Torsö.	2016-09-29 08:17:10	1948		2	3	2	2	1	Y	3	2	1	YES	6	1	2
Public Place	1	Fotograferar analogt och digitalt med Hasselblad och Nikon, svartvitt och färg, skär passepartout och gör komplett inramning. Vackra inramade bilder på Torsöbron. Perfekt som Present! CARLSTRÖM BILD S-542 91 TORSÖ I VÄNERN ### ### @@@ carlstrom.eu	2016-09-29 08:34:56	1948		2	3	2	1	1	Y	3	2	1	YES	6	1	2
Public Place	2	Loppis 10 september Gympasalen på Torsö Skärgårdsskola Klockan 10:00 – 14:00 Vill du sälja? Hör av dig till NN ###	2016-09-29 08:45:32	1948		2	2		1	1	Y	2	3	1	NO	1	3	2
Public Place	1	Trollingfiske på Vänern - under högsta comfort - www.vänertrolling.se Boende - 6 bäddar med pentry och tillgång till vedeldad bastu - Thomas @@@ eller ###	2016-09-27 08:25:04	1948		2	3	2	2	1	Y	2	2	1	YES	6	3	2
Public Place	1	Båtar, Motorer, Tillbehör, Service, Trailers, Bogpropellrar, Ankarspel, Inredning, Elarbeten, Förvalning Vedeldade badtunnor Serviceverkstad - Servicebil ring verkstaden ### Behåll ditt Crewcard eller teckna ett nytt om du inte har, då kommer alla kvitton att finnas i datan. Välkommen till oss Mariestads Marina Hammarsmedsgatan 25 • 542 35 Mariestad • ### • www.mariestadsmarina.se	2016-09-29 07:33:25	1948		2	3	2	1	1	Y	2	2	1	YES	6	3	2
	2	Tipspromenader på Torsö hösten 2016 Torsö Bygdegårds- och idrottsförrening anordnar traditionsenligt tipspromenader i samverkan med Torsö Skärgårdsskola. Promenaderna utgår från Skärgårdsskolan Söndagar från och med den 18/9 till den 23/10 Starttid 09.30-11.00 Startkort 10:- Bingobricka 5:- Lott 2:- Vuxen och Barnfrågor Om du går minst fyra av sex promenader kan du delta i utlottning av Landlotte…	2016-09-29 08:13:10	1948			19	1	2	1	Y	2	4	1	NO	4	1	2
Public Place	1	Alla är välkomna att träna med Ramón Malavé, världsmästare i karate Genom tankens kraft formas kroppens styrka! "Det handlar om balans som ger styrka, rörelse som skapar smidighet, fokusering som ger säkerhet. Efter fem lektioner känner du dig tryggare, efter femton är du starkare, efter trettio befinner du dig i mental och fysisk harmoni." Träna på ett modernt sätt med några av Sveriges bästa in…	2016-09-27 08:36:29	1869		2	3	1	2	1	Y	3	2	1	YES	6	2	2
Public Place	1	NIGHT TRAIL RUN Lördag 29 oktober kl 18.00 Bögs Gård Sollentuna Anmälan och information Nighttrailrun.se	2016-09-27 08:39:23	1869		2	18	1	2	1	Y	3	2	1	YES	2		2
Public Place	1	SOLLENTUNA FUNKISMELLO UTTAGNING TILL FINALEN 2017 4 OKTOBER KLOCKAN 16 ARENA SATELLITEN Kom och heja fram våra artister! Fri entré Konferencier:NN SOLLENTUNA KOMMUN Kultur-och fritidskontoret www.sollentuna.se/funkismello	2016-09-27 08:46:11	1869		2	20	4	2	1	Y	3	2	1	YES	2	2	2
Public Place	1	Välkommen till Rotebro IBKs innebandy för barn födda 2010! Rotebro IBKs innebandyskola vänder sig till barn som vill prova på innebandy på ett lekfullt sätt. Det finns ännu platser kvar i gruppen som tränar på tisdagar kl 16-17 i gamla Rotebrohallen. Om du är intresserad, kontakta NN på @@@ eller telefon ### Rotebro Innebandyklubb är den största innebandyföreningen i norra Sollentuna. Vi har ca 5…	2016-09-27 08:51:56	1869		2	3	1	2	1	Y	2	1	1	YES	6	2	2
Public Place	1	Zumba för alla! Var? Vattmyraskolan När? Tisdagar kl 19.00 med start 30 augusti Dansa till härliga latinska rytmer. Bättre kondition ingår i priset. Alla kan zumba! Du dansar efter din egen förmåga, inga höga hopp. Dansa med hjärtat så hänger fötterna med. Det viktigast är att du har kul och rör dig till musiken. Gymnastikskor och vattenflaska är allt som behövs. Zumbalady Elisabeth Tel. ### @@@ …	2016-09-27 09:09:17	1869		2	3	2	2	1	Y	3	5	1	NO	6	2	2
Public Place	1	Kustbandet i samarbete med Duke Ellington Society of Sweden KUSTBANDET It dont mean a thing if you ain't got that swing SPECIAL GUEST: NN SCALATEATERN Söndag 9 oktober kl. 15.00 Biljetter: Scalateaterns kassa, www.scalateatern.se ###	2016-09-27 09:11:22	1869		2	20	1	2	1	Y	3	4	2	YES	6	2	2
Public Place	1	Andakt Onsdagar 8.00 Örnsköldsviks kryka Kaffe och smörgås Svenska kyrkan ÖRNSKÖLDSVIK	2016-09-27 10:20:26	1852		1	17	1	2	1	Y	3	2	1	NO	4	1	2
Public Place	2	BERÄTTARKVÄLL Köpmanholmens Bruksmuseum. Tisdag 18 oktober kl 18.30 – ca 20.30 Kvällens tema: SOLGÅRDEN Vi uppmärksammar att det i år är 70 år sedan SOLGÅRDEN invigdes med pompa och ståt. Berättelser och bilder från Solgården. Välkommen med dina egna berättelser! Fri entré Fika NÄTRA HEMBYGDSFÖRENING Kulturbroar Studieförbundet Vuxenskolan	2016-09-27 10:20:40	1852		2	20	1	2	1	Y	3	2	1	NO	4	3	2
Public Place	1	Välkommen till Knåpfrökens sjöbod Här finns unika hantverk och bra presenter till bra priser Mina öppettider är: Alla dagar 11-18 Knåpfröken HANTVERK & SÖMNAD www.knåpfröken.se Lillsandsvägen 8, Köpmanholmen ###, ###	2016-09-27 10:27:26	1852		2	2	2	2	1	Y	2		1	YES	6	3	2
Supermarket	1	Exel Officepaketet Photoshop | Bokföring Förarintyg | Starta band Massor av språk | Babysim Att skaffa får, valp eller höns Jägarexamen | Kustskeppare Zumba - på flera orter Se alla kurser på vår webb Telefon: ### www.medborgarskolan.se Lust att lära! medborgarskolan	2016-09-27 10:29:23	1852		1	20	1	2	1	Y	3	2	1	YES	6	2	2
Supermarket	1	SOPPLUNCHER i FÖRSAMLINGSGÅRDEN HÖSTEN 2016 Tisdagar kl 1130 - 1300 6 september 4 oktober 1 november 6 december Grötlunch BEHÅLLNINGEN GÅR TILL Svenska kyrkan INTERNATIONELLT ARBETE ANUNDSJÖ SKORPED PASTORAT	2016-09-27 10:37:30	1852		1	20	1	2	1	Y	3	1	1	NO	5	1	2
Supermarket	1	KnivÖrjes Har du slöa verktyg? 20 års erfarenhet som knivmakare samt med kniv slipning, slipar nya knivblad också bl.a. kockknivar & bruksknivar mm. Ett bra verktyg men inte längre så vass? Lämna dina verktyg som knivar, saxar eller andra verktyg! Det lönar sig att grund slipa såväl gamla, trasiga, bruksknivar, billiga som exklusiva köksknivar, kvarndelar, olika typer av saxar mm. Grundslipning a…	2016-09-27 11:29:56	1852		1	3	7	2	1	Y	2	2	1	NO	1	1	2
Public Place	2	Myggjagare & Näbbstövlar EN MUSIKALISK BERÄTTARRESA GENOM 50-60-70-TAL Underkjolar av skumgummi är högsta mode, en krona ger 20 Dixiekolor och grannen skaffar sig en Opel Olympia. Gunnar Wiklund sjunger Tala närmre, i Folkets park slår Rock-Olga igenom och man dansar till Twilight time. Så småningom gör de kortkorta kjolarna entré och många i byn skaffar PV eftersom "Volvos värde varar". Melodife…	2016-09-27 10:35:28	1852		1	20	1	2	1	Y	3	2	1	YES	6		2
School	3	30 september FORSKARFREDAG En del av europeiska Reseachers' Night Fredag 30 september kl 10-15. Arken, Trekanten Upptäck forskning! Utställningar Örnsköldsviks forskare Fika med en forskare Tipsrunda Öppet hus Åkroken Business Incubator Aktiviteter Satelliten Rosettas pensionering Forskarfredag vänder sig till den breda allmänheten, men en särskild inriktning på barn och unga. Se mer information …	2016-09-27 10:37:59	1852		1	12	4	2	1	Y	3	3	1	YES	2	1	2
Public Place	2	Konstlotteri 2016 Vinstdragning. Nätra Hembygdsgård i Bjästa. Onsdag 5 oktober kl 18.00 Den som är närvarande vid dragningen har möjlighet att välja annan vinst än den som står på tur i vinstlistan. VÄLKOMNA! NÄTRA HEMBYGDSFÖRENING Kulturbroar BJÄSTA KONSTFÖRENING	2016-09-27 10:38:06	1852		2	20	1	2	1	Y	3	1	1	NO	4	3	2
Public Place	1	Svenska kyrkan ANUNDSJÖ FÖRSAMLING Kyrkokören Anundi torsdagar kl 18.30-20.30 i församlingsgården Höstens program: 2 okt Biskopsvisitation 5 nov Minnesgudstjänst 27 nov Adventsgudstjänst 11 dec Julmusik med lucia 25 dec Julotta Välkommen! NN tel ### @@@	2016-09-27 10:38:25	1852		2	20	1	2	1	Y	2	3	1	NO	6	1	2
Public Place	4	Vinnare av "The Award for the best Speciality Market in the UK" ORIGINALET International STREET MARKET *** 21-24 SEPTEMBER STORTORGET, ÖRNSKÖLDSVIK WWW.MATMARKNAD.NU	2016-09-27 10:42:16	1852		1	20	1	1	1	Y	3	5	2	YES	6	4	2
Public Place	1	Ulla's Fotvård Öppnar mån 2 Maj För tidsbokning: ### NN Diplomerad Medicinskfotterapeut VÄLKOMMEN "Till Nätragatan 33D Bjästa" (apotekshuset)	2016-09-27 10:45:00	1852		2	3	2	2	1	Y	2	1	1	NO	6	3	1
Public Place	1	OFÖRHAPPANDES NN & NN RIKSTEATERN SATTELITE LIVE Folkan Teater Onsdag 2 november kl 19.00 Biljetter på Ticketmaster.se & Turistbyrån, Lasarettsgatan 5, Örnsköldsvik Arrangör: Örnsköldsviks Riksteaterförening	2016-09-27 10:47:17	1852		1	20	1	1	1	Y	3	2	1	YES	6		2
Public Place	3	Nybyggt Hundpensionat Toppmodernt hundpensionat/hunddagis i naturskön miljö, strax utanför Örnsköldsvik. Varmt välkomna att boka in ett kostnadsfritt första besök hos oss på Gårdsbacken, detta med syfte att ni sedan ska känna er trygga med att lämna er hund. Mer info på Gårdsbackens hemsida, gardsbacken.se tel. ### eller ### @@@ Gårdsbacken HUNDCENTER	2016-09-27 10:48:53	1852		2	3	2	2	1	Y	3	1	1	YES	6	3	2
Public Place	1	PUB KB-65 supporterklubb inbjuder till: Pubafton lördag 8/10 kl. 19:00 PRO Allgården För endast 200 riksdaler erhåller du. - Mat och dryck. - Kaffe och kaka. - Musikunderhållning av Patrik och Micke. - Medlemskap i Supporterklubben året ut. - Öl o vin servering till bra priser för medlemmar. Biljetter köpes på Holmenkiosken Välkommen på en trevlig kväll och stöd samtidigt Supporterklubben och ind…	2016-09-27 10:51:22	1852		2	20	1	2	1	Y	2	2	1	NO	4	3	2
Public Place	1	ABBA Thank you for the music! MITT I VECKAN PARKEN ÖRNSKÖLDSVIK ONSDAG 19 OKTOBER kl 19:30 BILJETTPRIS vuxna 120:- barn under 7 år gratis INFO OCH BILJETTER Örnsköldsviks Turistbyrå tel ### ÖVIK BIG BAND	2016-09-27 10:51:28	1852		1	20	1	1	1	Y	3	2	2	NO	1		2
Public Place	1	Johnnys Allservice Tjänster inom bygg, trädgård och fastighetsskötsel Nyttja rot- och/eller rutavdraget! Ring ### för mer information! Välkomna! F-skattesedel finns	2016-09-27 10:56:25	1852		2	3	2	2	1	Y	2	2	1	NO	1	3	1
Public Place	1	Träffpunkten Sörgården Välkommen! MUSIKCAFÉ MED TRIVSELKÖREN Tisdag 27 sept. kl. 13:15 i Samlingssalen, Sörgården Boende 20 kr, övriga 30 kr VÄLKOMMEN. VÄLFÄRDSFÖRVALTNINGEN Träffpunkten Sörgården, S Långg. 22 , 1 tr upp, Bredbyn ### ### ABF ARBETARNAS BILDNINGSFÖRBUND ÖRNSKÖLDSVIKS KOMMUN	2016-09-27 10:58:42	1852		2	20	1	2	1	Y	3	1	1	NO	6	1	2
Public Place	1	Sandvikens fiskeläge www.sandvikensfiskelage.se Sandvikens Fiskeläge- ett unikt fiskeläge på norra Ulvön Sandvikens Fiskeläge är en boendeanläggning och ett kulturreservat , lugnt och vackert beläget vid havet på Ulvöns norra udde, mitt i världsarvet Höga Kusten. Det är ett av Sveriges bäst bevarade fiskelägen. De flesta husen uppfördes i slutet av 1700-talet. Här finns 28 stugor för uthyrning, 1…	2016-09-27 11:20:57	1852		2	5	2	2	1	Y	3	2	1	YES	6	3	2
Public Place	1	Ny singel ute nu! Spotify Allt jag har THOMAS STENSTRÖM Ny singel ute nu! Spotify	2016-09-27 11:30:23	1901		2	24	8	2	1	Y	3	2	1	NO		3	2
Public Place	2	1 okt. Lönelördag och framförallt bäst av allt.... THE NINETIES is back STICKY FINGERS TOP FLOOR LÖRDAG 1 OKTOBER more info www.stickyfingers.nu	2016-09-27 11:37:34	1901		2	3	2	2	1	Y	3	2	2	YES	2	3	2
Public Place	1	klubb impuls 30/9 Chili Vanilla (NO) Pombo (NO/SWE) Rörrar 18.00 Plats: Fängelset, Kålltorpsgatan 2 Entré: 50-100 kr efter vilja och förmåga Fri entré t.o.m. 20 år www.klubbimpuls.se	2016-09-27 11:41:51	1901		2	20	1	2	1	Y	3	5	1	YES	6	3	2
Public Place	2	Café & Minibageri • Glassbar Sia Unik butik med fantastiska smaker Ekologiska produkter SKAFFERI KARLSSON Café & Butik 2 mil söder Örnsköldsvik Öppet: Mån-fred. 11.00-19.00 Lördag 11.00-17.00 UTESERVERING Nätragatan 22A 893 30 BJÄSTA CENTRUM ### www.facebook.com/skafferikarlsson1	2016-09-27 11:33:46	1852		2	2	2	2	1	Y	3	2	1	YES	6	3	2
Public Place	2	MATRÄTTEN – för allas rätt till mat NN är två år gammal. Hon är en av 795 miljoner människor som ofta äter för lite, för näringsfattigt och för sällan. Trots att mat är en mänsklig rättighet. Trots att jordens resurser skulle kunna föda oss alla. Var med och bekämpa en av världens största orättvisor! SMS:a MAT till 72905 och ge 100kr FÖR ALLAS RÄTT TILL MAT Swisha valfritt belopp till 9001223 PG …	2016-09-27 12:37:26	1944		2	24	1	1	1	Y	3	2	1	NO	5	2	2
Public Place	1	SALSA – För alla Start 23 september Fem onsdagar kl. 19.00 på sliperiet All information och anmälan här: www.oviklatinoclub.se Inga förkunskaper, alla åldrar	2016-09-27 12:51:45	1944		2	20	1	2	1	Y	2	1	1	YES	2	2	1
Public Place	1	King of the Blues En hyllning till BB Kings med Arnesen Bluesband och Claes Janson BRUX 30/9 KL 20.00	2016-09-27 13:33:30	1944		2	20	2	1	1	Y	4	2	2	NO	5	2	2
Public Place	1	FOLKAN TEATER Örnsköldsviks Riksteaterförening Ted Gärdestad, livet och sångerna 26 november kl. 19:00 Recensenter och publik entusiastiska!!! Över tvåhundrafemtio föreställningar. Kenneth Gärdestad har hjälpt till med att berätta om sångerna och livet. Erik Winqvist och Simon Forsman tolkar och förmedlar. Det är personligt och uttrycksfullt. Texterna får nytt liv, musiken ljuder och berättelsen …	2016-09-27 13:45:01	1944		2	20	1	2	1	Y	3	2	1	YES	6	2	2
Public Place	1	FOLKAN TEATER, Örnsköldsviks riksteaterförening 2 november kl 19.00 Aktuellt, musikaliskt och alldeles, alldeles.... oförhappandes. Ronny Eriksson är tillbaka! Satir, humor och ståupp. I en helt ny föreställning tar Ronny Eriksson på sitt karaktäristiska sätt temperaturen på Sverige idag; på stad och landsbygd, på rättvisor och orättvisor. Det blir dessutom mycket musik; både nyskrivet och Ronnyk…	2016-09-28 14:10:04	1944		2	20	1	2	1	Y	3	2	1	YES	6	2	2
Public Place	2	Mötley Crüe ONCE IN A LIFETIME EXPERIENCE FIRST EVER MÖTLEY CRÜE EXHIBITION 17 th September – 18 th November Museum & Artgallery, Örnsköldsvik, Sweden MCRUELOYALTY	2016-09-29 14:31:52	1944		2	20	1	2	3	Y	3	2	1	NO	4	2	2
Public Place	2	Allt jag har Live på Folk. 1 oktober Dörrarna öppnas 17.00, Gig 22.00. Fritt inträde, först till kvarn. THOMAS STENSTRÖM Ny singel ute nu! Spotify	2016-09-27 13:17:29	1901		2	24	8	2	1	Y	3	2	1	NO		3	2
Public Place	1	Nefertiti MALIN WÄTTRING 4 MÖTER BOHUSLÄN BIG BAND Ons 12 Okt 2016 19.00, 160 sek nefertiti.se	2016-09-27 13:20:43	1901		2	20	2	1	1	Y	3	2	1	YES	2	3	2
Public Place	1	LUGER I SAMARBETE MED ITB PRESENTERAR bear's den 18 OKTOBER DEBASKER MEDIS STOCKHOLM 19 OKTOBER PUSTERVIK GÖTEBORG BILJETTER VIA LUGER.SE	2016-09-27 13:23:15	1901		2	20	2	2	1	Y	3	2	1	YES	2	3	2
Private Place	1	Hundvakt åt Fibie? Vi har en miniatyrbullterier och söker någon med hundvana som ibland kan hjälpa till att ge henne en promenad när vi jobbar. Hon är 2,5år gammal, fortfarande ganska valpig, väldigt snäll och gosig. Ring eller skriv gärna till oss. Hälsningar NN, NN och NN	2016-09-28 07:46:18	1855		1	3	7	1	1	Y	2	2	1	NO	1	1	1
Supermarket	4	Nybyggt Hundpensionat Toppmodernt hundpensionat/hunddagis i naturskön miljö, strax utanför Örnsköldsvik. Varmt välkomna att boka in ett kostnadsfritt första besök hos oss på Gårdsbacken, detta med syfte att ni sedan ska känna er trygga med att lämna er hund. Mer info på Gårdsbackens hemsida, gardsbacken.se tel. ### eller ### @@@ Gårdsbacken HUNDCENTER	2016-09-28 07:46:35	1863		1	3	2	2	1	Y	3	1	1	YES	6	1	2
Supermarket	2	Ju-Jutsu Nybörjare 6-9 år Tisdagar & Torsdagar 18.00 - 19.00 9-13 år Tisdagar & Torsdagar 18.00 - 19.00 14+ år Tisdagar & Torsdagar 19.00 - 20.15 Ingen föranmälan krävs Första träning tisdag 23 Aug. Ni hittar oss på Sjögatan 6M. www.oksf.se Prova gratis hela september ÖKSF ÖRNSKÖLDSVIKS KAMPSPORTSFÖRENING	2016-09-28 07:48:14	1863		1	20	1	2	1	Y	3	3	1	YES	6	1	1
Supermarket	3	NYHET! STARTAR VECKA 37 TORSDAGAR MELLAN 18:30-19:30 ChiBall Det bästa från Yogan, Taili, QiGong & Pilates. I handen har man en mjuk aromaboll till hjälp med både balans och självmassage. Torsdagar 18:30–19:30 på Församlingshemmet Örnsköldsvik 1300:- inkl. boll och matta Anmälan till Korpen Tel: ### eller e-post: @@@ KORPEN Tjänstemannagatan 3 892 50 Domsjö	2016-09-28 07:50:08	1863		1	18	2	2	1	Y	2	2	1	NO	6	1	2
Supermarket	3	Myggjagare & Näbbstövlar EN MUSIKALISK BERÄTTARRESA GENOM 50-60-70-TAL Underkjolar av skumgummi är högsta mode, en krona ger 20 Dixiekolor och grannen skaffar sig en Opel Olympia. Gunnar Wiklund sjunger Tala närmre, i Folkets park slår Rock-Olga igenom och man dansar till Twilight time. Så småningom gör de kortkorta kjolarna entré och många i byn skaffar PV eftersom "Volvos värde varar". Melodife…	2016-09-28 07:51:42	1863		1	20	1	2	1	Y	3	2	1	YES	6	1	2
Supermarket	1	BORTSPRUNGEN! Har någon sett våran Nola, den svarta katten med vitt och orange i sin päls? Hon försvann från __vägen 5, i Sundområdet i lördags 27/8-16. Hon har halsband på sig med mina kontakt uppgufter. De är så att jag å min sambo + Nolas bror simba den, vita katten, flyttade i lörsdags 3/9-16. Om ni vet något eller hittar henne ring: ### NN	2016-09-28 07:52:20	1863		1	9	7	1	1	Y	1	2	1	NO	1	1	2
Supermarket	1	Östman Rör AB Din lokala Rörmokare nära dig Allt inom VVS-Värme ### www.ostmanror.se Facebook-östman Rör	2016-09-28 07:53:18	1863		1	3	2	1	1	Y	2	1	1	YES	6	3	1
Supermarket	3	Nu är det dags för MARKNAD OCH LOPPIS Godtemplargården i ÅTE Lördagen den 24/9 2016 Kl. 11-15 Kom och fynda! Fika. Korvförsäljning. Välkommen ÄVEN FÖRSÄLJNING AV GODTEMPLARDRICKA Arr. 2334 NORRLAND IOGT-NTO	2016-09-28 08:05:03	1863		2	2	1	2	1	Y	4	3	1	NO	4	3	1
Supermarket	5	Vinnare av "The Award for the best Speciality Market in the UK" ORIGINALET International STREET MARKET *** 21-24 SEPTEMBER STORTORGET, ÖRNSKÖLDSVIK WWW.MATMARKNAD.NU	2016-09-28 08:06:24	1863		2	20	1	1	1	Y	3	5	2	YES	6	4	2
Supermarket	4	TRAIL ÖVIK 17 SEPTEMBER 2016 1,7KM 3,9KM 6KM 12KM Trailövik – för alla. Äkta trailglädje! Riktigt kul och utmanande. Trailövik är en fantastisk upplevelse. Trailövik består av fyra olika bansträckningar: Minitrail 1,7 km för de yngre upp till 10 år; Motion 3,9 km där sträckan går längs elljusspåret i Själevad; 6 km som går på stigar och elljusspår i Själevad samt 12km som är lite tuffare både vad…	2016-09-28 08:07:22	1863		2	18	1	2	1	Y	3	5	1	YES	6	3	2
Supermarket	3	LÖRDAGSDANS Jontez ISLADAN Bjästa 140:- PAUSFIKA INGÅR I PRISET OBS ! LÖRDAG 17 sept kl.19-23 VÄLKOMMEN NÄTRAGILLET www.natragillet.com	2016-09-28 08:08:01	1863		2	20	2	2	1	Y	3	2	1	YES	2	3	2
Supermarket	1	Billig Ved till Salu. Ring: ###	2016-09-28 08:08:34	1863		2	2	7	1	1	Y	1	1	1	NO	1	1	1
Supermarket	1	Stuga Säljes. Ring. telnr. ### 12 kvm nybyggd.	2016-09-28 08:08:56	1863		2	5	7	1	1	Y	1	1	1	NO	1	1	1
Supermarket	1	The Big Picnic Konsert för Bancancerfonden Akustiska covers & egna låtar av och med: NN NN Andakt NN Fri entré Söndag 25/9 kl 18.00 Själevads kyrka Svenska kyrkan SJÄLEVADS FÖRSAMLING	2016-09-28 08:09:58	1863		2	20	1	1	1	Y	3	2	2	NO	4	2	2
Supermarket	1	Moälvens IBK ÖRNSKÖLDSVIK ÄR DU INTRESSERAD ATT BÖRJA SPELA INNEBANDY..? Nu är det dags för INSKRIVNING av tjejer och killar födda 2009. Söndagen den 18 september kl 10.00-11.30 i Nolaskolans gymnastiksal. Några föräldrar behöver ta på sig någon form av ledarroll för dessa lag då det är en förutsättning för fortsättningen. Meddela gärna detta vid inskrivningen. Frågor och funderingar? Kontakta NN…	2016-09-28 08:10:20	1863		2	20	1	2	1	Y	3	2	1	NO	6	1	2
Supermarket	1	FINSKA DRAGSPELSLEGENDEN VEIKKO AHVENAINEN CARINA NORDLUND GIDEÅGÅRDEN Torsdagen 6/10 kl. 19.00 KOM OCH LYSSNA TILL DRAGSPELS-KLASSIKER, POPULÄRA TANGO, VALSER, POLKA M.M VÄLKOMMEN TILL HÖSTENS DRAGSPELSKONSERT! Biljetter 100:-	2016-09-28 08:10:54	1863		2	20	1	2	1	Y	3	2	1	NO	4	3	2
Supermarket	5	Nybyggt Hundpensionat Toppmodernt hundpensionat/hunddagis i naturskön miljö, strax utanför Örnsköldsvik. Varmt välkomna att boka in ett kostnadsfritt första besök hos oss på Gårdsbacken, detta med syfte att ni sedan ska känna er trygga med att lämna er hund. Mer info på Gårdsbackens hemsida, gardsbacken.se tel. ### eller ### @@@ Gårdsbacken HUNDCENTER	2016-09-28 08:12:23	1863		2	3	2	1	1	Y	3	1	1	YES	6	1	2
Supermarket	1	KVÄLLEN FÖR ALLA SOM VILL ROA SIG UTAN ATT TRÄFFA PÅ SINA BARN I BAREN RUNT 50 BRUX, ÖRNSKÖLDSVIK 8 OKTOBER KVÄLLENS DJ SPELAR MUSIKEN DU KÄNNER IGEN MAT OCH ENTRÉ 295 KR ENDAST ENTRÉ 120 KR BORDSBOKNING: ### PIGALLE EVENEMANG ### ÅLDERSGRÄNS 40 ÅR	2016-09-28 07:54:48	1863		1	20	2	2	1	Y	3	1	1	NO	1	1	2
School	1	Lärarförbundet Välkommen till facklig info! Tisdag 20/9 kl. 15.15 i sal 102 på Nola. • Dina frågor och funderingar • Info från samverkan och synpunkter inför nästa samverkan • Arbetsmiljö • Schema, arbetstidoch brytningsperioder Alla är välkommen även om du inte är medlem. Medlem kan du bli på plats. Välkommen! Meddela gärna om du kommer till NN eller NN	2016-09-28 08:04:11	1863		1	13	1	1	1	Y	2	1	1	NO	4	4	1
Private Place	1	OM MARKNADEN BESTÄMMER HYRORNA TVINGAS MÅNGA ATT FLYTTA	2016-09-28 07:57:23	1855		1	23	8	1	1	Y	2	1	1	NO	5	1	2
Supermarket	1	Blixten Fixar Allt Innehar F-skattesedel Är du fundersam hur du ska fixa ditt hus, hör av dig till oss Några exempel på områden vi är specialiserade inom. • All sorts murning samt putsning/gjutning • All typ av renovering och nybyggnationer • Måttbeställda fönster och dörrar i trä, alu och pvc • Takbyten • Fönster- och dörrbyten • Altaner • Rivning • Papptak • Tegeltak • Plåttak • Isolering av ta…	2016-09-28 07:58:03	1863		1	3	2	1	1	Y	2	1	1	NO	1	1	1
Supermarket	1	Till Salu: Säng 105x200 Ny Madrass Säljes Billigt ###.	2016-09-28 07:59:04	1863		1	3	7	1	1	Y	1	1	1	NO	1	1	1
School	1	ADDA MATTE Hur laddar du inför höstens högskolestudier? Matematik är ett avgörande ämne på många utbildningar och du kan förbereda dig smart genom att läsa sommarmatte på nätet. På sommarmatte.se kan du plugga tillsammans med tusentals andra studenter och ta hjälp av våra mentorer. Kurserna är nätbaserade och du väljer själv start och tempo. De är avgiftsfria, ger högskolepoäng och rätt till stud…	2016-09-28 07:59:07	1863		1	12	8	1	1	Y	3	1	1	YES	6	1	2
School	1	Beijerstiftelsens Lärarpris till Ingvar Lindqvists minne 2017 KÄNNER DU EN FANTASTISK LÄRARE? Vi vet tt SVerige har bra lärare, nu behöver vi din hjälp för att hitta dem som är riktigt bra. De som inspirerar, utvecklar, sprider kunskaper utöver det vanliga och blir förebilder för både elever och kollegor. Känner du en sådan lärare? Då kan du nominera hen till Beijerstiftelsens Lärarpris till Ingv…	2016-09-28 08:00:59	1863		1	24	1	1	1	Y	3	2	1	YES	6	1	2
Supermarket	1	Höstmarknad Nolaskolans ljushall Lördag 24:e september kl. 9-13 Kläder Ytterkläder Recycling Mums	2016-09-28 08:00:06	1863		1	2	1	2	1	Y	3	2	1	YES	6	1	2
School	1	www.blitolk.nu Härnösands fhsk • Nordiska fhsk • Strömbäcks fhsk • Väddö fhsk • Västanviks fhsk • Önnestads fhsk • Örebro fhsk	2016-09-28 08:03:06	1863		1	24	2	1	1	Y	3	1	1	YES	2	1	2
School	1	Satsa på SJÖFART	2016-09-28 08:03:46	1863		1	24		1	1	Y	3	2	1			1	2
School	1	Karolinska Institutets Sommarforskarskola för gymnasieelever 2016 Intresserad av forskning? Sommarforskarskolan erbjuder motiverade ungdomar en chans att få aktivt delta i ett forskningsprojekt vid Karolinska Institutet. Elever får arbeta under handledning på existerande forskningsprojekt vid ett av Karolinska Institutets laboratorier. Forskarskolan anordnades för första gången 1985 och under åre…	2016-09-28 08:04:52	1863		1	12	1		1	Y	3	2	1	YES	6	1	2
School	1	GRATIS KATALOG SMS:a STUDERAUTOMLANDS till 72660 UPPTÄCK VÄRLDEN OCH PLUGGA SPRÅK UTOMLANDS! Plugga engelska, spanska, franska, tyska, italienska, japanska och mandarin utomlands med EF och få ditt livs upplevelse! Ditt äventyr börjar nu! Är du redo? Telefon: ### Email: @@@ www.ef.se	2016-09-28 08:05:15	1863		1	3	2	1	1	Y	3	2	1	YES	6	1	2
School	1	INTERNATIONELLA MARKNADSFÖRINGSPROGRAMMET INTRESSERAD AV NYA UTMANINGAR? UTVECKLA DIN FÖRMÅGA ATT LÖSA AFFÄRSRELATERADE PROBLEM? LÄRA DIG MER OM HUR FÖRETAG AGERAR PÅ INTERNATIONELLA MARKNADER? JOBBA PÅ EN INTERNATIONELL MARKNAD? MÄLARDALENS HÖGSKOLA ESKILSTUNA VÄSTERÅS www.mdh.se/utbildning/program/imf | @@@ www.twitter.com/imfprogrammet | www.facebook.com/imfprogrammet	2016-09-28 08:06:15	1863		1	24	8	1	1	Y	3	2	1	YES	6	1	2
School	1	EKONOMPROGRAMMET INTERNATIONAL BUSINESS MANAGEMENT TVÅ UTBILDNINGSPROGRAM INOM FÖRETAGSEKONOMI EKONOMPROGRAMMET – AFFÄRSMÄSSIGT NYTÄNKANDE, LÅNGSIKTIGT NÄRINGSLIVSANKNUTNA KURSER INTERNATIONEL BUSINESS MANAGEMENT – ALLT PÅ ENGELSKA FÖR DIG SOM VILL LEDA FÖRETAG MÄLARDALENS HÖGSKOLA ESKILSTUNA VÄSTERÅS www.mdh.se/utbildning/program/ekonom www.mdh.se/utbildning/program/ibm	2016-09-28 08:06:37	1863		1	24	8	1	1	Y	3	2	1	YES	2	1	2
Supermarket	1	EFTERLYSNING En Tigerrandig vit haklapp HETER Gumman VITA Tassar förssvan från ___ vägen 7D Är det någon som har sett eller vet vart KATT Flickan är vänligen ring ### SAKNAD! /Tack "Husse"	2016-09-28 08:01:47	1863		1	9	7	1	1	Y	1	1	1	NO	1	1	2
Private Place	1	Känner du dig trygg i ditt eget hem? Det finns mycket som hotar din trygghet som hyresgäst idag. Politiska beslut har försvagats hyresgästernas ställning gentemot hyresvärden genom lagändringar och kostnadsökningar. När hyresvärden tar tuffa tag är det dags för dig att hävda din självklara rätt som hyresgäst. Kom med i hyresgästföreningen! Ring din Hyresgästförening eller ### redan idag! Hyresgäs…	2016-09-28 08:06:19	1855		1	24	1	1	1	Y	3	2	1	NO	1	1	2
Public Place	1	NU ÄR DET DAGS IGEN SÖNDAG 11 SEPTEMBER STARTAR HÖSTENS TIPSPROMENADER ANMÄLAN I GAMLA HEMMET KL 10–12 VARJE SÖNDAG 20:- FÖR DE STORA OCH 10:- FÖR DE SMÅ ENKLARE FIKAFÖRSÄLJNING FINNS VÄLKOMNA VÄSTRA HUSBY HEMBYGDSFÖRENING	2016-09-28 08:18:22	1909		2	20	1	1	1	Y	2	1	1	NO	5	3	1
	1	Violinisten 1 Ulrik Lundström NOTPOSTEN CD medföljer	2016-09-28 08:27:51	1909			2	2	2	1	Y	3	2	1	YES	6	1	2
Supermarket	3	Café & Minibageri • Glassbar Sia Unik butik med fantastiska smaker Ekologiska produkter SKAFFERI KARLSSON Café & Butik 2 mil söder Örnsköldsvik Öppet: Mån-fred. 11.00-19.00 Lördag 11.00-17.00 UTESERVERING Nätragatan 22A 893 30 BJÄSTA CENTRUM ### www.facebook.com/skafferikarlsson1	2016-09-28 08:28:21	1944		1	2	2	2	1	Y	3	2	1	YES	6	2	2
Public Place	1	CIRKUS BRAZIL JACK NORRKÖPING Nya cirkusplatsen vid Himmelstalundsbadet! HIMMELSTALUND Lördag 3 sept kl 16 Söndag 4 sept kl 16 BILJETTER: Norrköpings Turistbyrå www.ticketmaster.se. Ticketmaster ### Cirkuskassan öppen lördag-söndag kl 15-16 "Cirkus Brazil Jack – simply the best"	2016-09-28 08:30:22	1909		2	24	2	2	1	Y	3	2	2	YES	6	2	2
Supermarket	1	Välkommen till Myckelgensjö den 1 Oktober på rockabilly med The Spectratones! Köp av biljetter och mer info kontakta NN via facebook eller telefon. Tel: ###. Boende finns att hyra på Myckelgensjö camping. För information och bokning ring Tel: ### Pris 150kr/st utan mat eller 200kr/st med mat. Insläpp kl.19:00 Bandet börjar spela ca 21:30 Endast förköp Spectratones Arr: Myckelgensjö Föreningshus	2016-09-28 08:36:24	1944		1	20	1	2	1	Y	2	5	1	NO	6	2	1
Supermarket	1	Senioruthyrning.se Senioruthyrning.se i Örnsköldsvik söker Seniorer 67 år och äldre som vill arbeta några timmar då och då. Företag –Hantverkare – Hushållsnära tjänster Kontakta NN eller NN för ett personligt möte!	2016-09-28 08:39:02	1944		1	3	1	1	1	Y	2	2	1	YES	6	2	1
Supermarket	1	Svenska TATUERINGS MÄSSAN 24:E ÅRET 22-24 APRIL 2016 Piercing Tävlingar Resturang Underhållning BORGEN-FOLKETS PARK NORRKÖPING www.svenskatatueringsmässan.com	2016-09-28 08:43:43	1909		1	20	2	2	1	Y	3	2	1	YES	6	2	2
Public Place	1	Samverkan mot brott Grannsamverkan Neighbourhood Watch Boende Fastighetsägare Försäkringsbolag Polisen SSF Stöldskyddsföreningen www.samverkanmotbrott.se	2016-09-28 08:55:52	1864		2	24	1	1	1	Y	3		2	YES	2	4	2
Public Place	1	REMBOSTUGAN - STRANDBACKEN - MÅNSBO Hedemora, Rembo, Grönvallen, fridhem 1 km elljus 5 km elljus (kan av avkortas) 10 km Åkriktning Tavlans plats Karta: V-Dala Miljö & Bygg	2016-09-28 09:05:58	1864		2	24	1	1	1	Y	3		1	NO	5	4	2
Public Place	1	ÅTERFÖRSÄLJARE NN __VÄGEN 13 HEDEMORA Tel. ### HONUNG Murarbiets honung AB	2016-09-28 09:09:00	1864		2	2	7	1	1	Y	4		1	NO	6		1
School	1	Välkommen till Domsjöskolans Fritids SKOGEN MYRAN MÅSEN	2016-09-28 08:56:13	1876		1	24		2	1	Y	2	4	1			1	2
School	1	Nytt schema till fritids? Så här gör du din schemaändring: Gå in på www.ornskoldsvik.se Självservice E-tjänster och blanketter Barnomsorg och utbildning Beräkna taxa för barnomsorg, ändring av schema, inkomstuppgift, adress (under rubriken "Barn 0-5 år, E-tjänster") Saknar du inloggning till detta? Kontakta NN @@@ ### Tänk på att det tar ca 3 arbetsdagar innan fritidspersonalen ser ändringarna!	2016-09-28 08:57:03	1876		1	24		2	1	Y	2	3	1	YES	6	1	1
School	1	Ordningsregler Domsjöskolan Vi vill alla ha ordning och arbetsro i skolan, för då ökar trivseln och möjligheten till att få goda resultat i lärandet. ☆ Jag använder ett vårdat språk. ☆ Jag behandlar andra som jag själv vill bli behandlad. ☆ Jag passar de tider som gäller under skoldagen. ☆ Jag äter inte godis och tuggummi under skoldagen. ☆ Jag använder inte min mobiltelefon under skoldagen om in…	2016-09-28 08:57:31	1876		1	24	8	1	1	Y	2	5	1	NO	5	1	2
Public Place	1	MANGAFÖRENINGEN På Mangaföreningen träffas och pratar vi som är intresserade av manga, anime, spel och annan asiatisk kultur. Kom och hälsa på här Nytorgsgatan 17B Öppettider måndag, torsdag 16:00-20:00 För övriga öppettider och aktiviteter se Mangaföreningens grupp på Facebook www.mangaforeningense Sverok ABF ARBETARNAS BILDNINGSFÖRBUND	2016-09-28 09:02:29	1876		1	20	1	2	1	Y	3	4	1	YES	6	1	2
Supermarket	2	PRO CHARLOTTENBERG Har sillsexsa den 11/10 i folkets hus Kl 1400 Underhållning Lotteri Sista anmälan 6/10 Ring til NN för anmälan ### ( 50kr per person) Välkomna	2016-09-28 09:08:39	1914		1	20	1	1	1	Y	2	5	1	NO	1	1	2
Supermarket	1	HAPPY KIDS Barnklippningar 199:- Ord pris 290:- Alla barn klippningar 0-11år Gäller endast tisdagar NIKITA HAIR a great feeling	2016-09-28 09:09:33	1914		1	3	2	1	1	Y	3	1	2	NO	5	2	2
Public Place	1	13/8 2016 HÖGA KUSTEN TRAMPET För anmälan och info: www.hkcyklisterna.se OBS! Anmälan senast DEN 5 AUGUSTI! Därefter sker anmälan vid start mot förhöjd avgift. Start på Torget i Kramfors 95km kl. 9:30 55km kl. 10:00 Höga Kusten Cyklisterna www.hkcyklisterna.se Kontaktinformation Mobil: ### E-post: @@@	2016-09-28 09:11:35	1876		2	18	1	2	1	Y	3	2	1	YES	6	3	2
Public Place	1	Internationell kulturdag med Mångkulturellt Centrum Lördag 10 september På Stora torget kl. 10-15 Dans, musik och aktiviteter i sammarbete med olika föreningar och grupper. Barnlekar Flerspråkigt centrum, Museum, Biblioteket, Donation. Hjärt-lung förening, IKF, Thai, Eritreanska, Syrianska, Afganska, Världskvinnor Folkhögskola, SambaNola och Nolagillet ÖRNSKÖLDSVIKS KOMMUN VÄRLDKLASS ÖRNSKÖLDSVIK…	2016-09-28 09:19:35	1876		2	20	4	2	1	Y	3	3	1	NO	4	1	2
Public Place	1	Konstutställning NN Nätra Hembygdsgård i Bjästa 7 juli – 24 juli, Alla dagar kl 12–16 Vernissage 7 juli, kl 12.00 Kommande utställningar 26 juli – 14 augusti NN & "Gamla Nätrabilder" Bjästa Konstförening Kulturbroar Studieförbundet Vuxenskolan HIGH COAST ART VALLEY	2016-09-28 09:24:10	1876		2	20	1	2	1	Y	3	4	1	NO	4	3	2
Public Place	1	Konstutställning NN Nätra Hembygdsgård, Bjästa 6 juli - 24 juli, alla dagar kl 12–16 Vernissage 6 juli, kl 12.00 Kommande utställningar 26 juli – 14 augusti NN & "Gamla Nätrabilder" Bjästa Konstförening Kulturbroar Studieförbundet VuxenskolanHIGH COAST ART VALLEY	2016-09-28 09:27:16	1876		2	20	1	2	1	Y	3	4	1	NO	4	3	2
Public Place	2	FOTBOLL Örnvallen SÖNdagen den 25/9 kl. 16,00 DIV 5 ROTTNEROS IK IF ÖRNEN Entré: 40:- Fotbollsektionen	2016-09-28 09:12:14	1914		2	18	1	1	1	Y	4	1	1	NO	5	3	1
School	4	30 september FORSKARFREDAG En del av europeiska Reseachers' Night Fredag 30 september kl 10-15. Arken, Trekanten Upptäck forskning! Utställningar Örnsköldsviks forskare Fika med en forskare Tipsrunda Öppet hus Åkroken Business Incubator Aktiviteter Satelliten Rosettas pensionering Forskarfredag vänder sig till den breda allmänheten, men en särskild inriktning på barn och unga. Se mer information …	2016-09-28 09:12:51	1876		1	12	4	2	1	Y	3	3	1	YES	2	3	2
School	3	WILL YOU BE THE LAST MAN STANDING NOLASKOLANS ELEVRÅD	2016-09-28 09:19:02	1876		1	24	1	2	3	Y	3	1	2	NO	5	1	2
School	1	FILM SKOLA Vill du skapa film efter skoltid? Kom till Filmskolan i Sliperiet måndagar och torsdagar. 17.30–20.00 så får du hjälp KONTAKT: NN ### @@@ Kulturskolan	2016-09-28 09:22:43	1876		1	24	1	2	1	Y	3	3	1	NO	6	1	2
School	1	Ta chansen att prova på Mma i höst! Nybörjarintag tisdag 13 sept 19:15. Träna Gratis september ut och därefter 800 kr per termin Träningstider: Tis: 19:15 Tor: 1915 Kontakt: NN ### ###	2016-09-28 09:22:51	1876		1	3		2	1	Y	3	2	1	NO	1	1	2
Public Place	1	REPLOKAL Starta band? Eller behöver ni replokal? Vi har fullt utrustade replokaler med trummor, bas, keyboard, gitarrer, PA-anläggning och förstärkare. Allt ni behöver för att starta. Har ni egna instrument är ni välkomna att ta med dem också. Replokalen är öppen för alla åldrar och musikstilar. Hör av er till oss så hjälper vi er att komma igång. Kontakta oss: NN ### @@@ NN ### @@@ www.thetube.se	2016-09-28 09:13:51	1876		1	5	2	2	1	Y	3	5	1	YES	6	3	2
Public Place	1	Allidrott Örnsköldsvik Prova fem indrotter helt gratis Du kan vara med på en idrott, eller välja flera Inget krav på närvaro eller medlemskap Dans: Söndag 2, 9, 16, 23 oktober med Örnsköldsviks Gymnastikklubb, Parkskolan Tennis: Söndag 30 oktober, 6, 13, 20 noveber, med Örnsköldsviks Tennisklubb, Mattsborgen Bordtennis: Söndag 27 november, 4, 11, 18 december, med Norra Bordtennisklubb, Parkskolan…	2016-09-28 09:14:33	1876		1	20	1	2	1	Y	3	2	1	YES	2	1	2
School	1	Våga prata med någon Är du oroad eller bekymrad över att någon i din närhet dricker för mycket? Prata med någon vuxen, så som skolsköterska, kurator eller annan du har förtroende för, du är inte ensam och det finns många som är villiga att lyssna. Vi finns i din närhet Fältgruppen NN, ### NN, ### NN, ### Mail: @@@ Instagram: faltgruppenornskoldsvik Samtalsbyrå för unga (16-30 år) Telefon: ### Mai…	2016-09-28 09:18:24	1876		1	24	4	1	1	Y	3	1	1	YES	6	1	2
School	1	GLÖMDE DU KONDOMEN I SOMRAS? BESTÄLL HEM ETT GRATIS KLAMYDIA HEMTEST! I Sverige får fyra personer i timmen klamydia. Under sommaren smittas ännu fler. Du kan ha klamydia utan att det varken syns eller känns, men om den inte behandlas kan det leda till att du inte kan få barn. Därför är det viktigt att du testar dig om du har haft samlag utan kondom. Om du inte har möjlighet att besöka en av våra …	2016-09-28 09:26:14	1876		1	24	1	1	1	Y	3	4	1	YES	2	1	2
School	1	Ta kontroll över ditt röksug Ladda ner UMO:s app Fimpaaa! Helt gratis. SE FILMERNA MED DE VET DU PÅ UMO.SE/FIMPAAA UMO	2016-09-28 09:29:41	1876		1	24	1	1	1	Y	3	2	1	YES	2	1	2
Supermarket	1	Ingen ska behöva bli sjuk av sitt jobb. Vi ser ökande sjuktal och eskalerande kostnader, inte minst för den psykiska ohälsan. Vi ser larmrapporter om hög personalomsättning. Vi ser ett arbetsliv som gör måga männsiskor sjuka. Samtidigt vet vi att det finns friskfaktorer. Att systematiskt arbetsmiljöarbete är en lönsam investering. Att väl fungerande samverkan mellan fack och arbetsgivare är nödvä…	2016-09-28 09:27:23	1876		1	24	1	1	1	Y	3	1	1	YES	2		2
Public Place	1	ZUMBA Höstens träningar startar den 29 augusti 2016 MÅNDAGAR Markusskolan, Avesta kl 17:30 - 18:15 ZUMBA Kids 7-11 år Markusskolan, Avesta kl 18:30 - 19:00 ZUMBA Burst - intensiva intervaller TISDAGAR Hede Bystuga, Västanhede kl 17:30 - 18:15 ZUMBA Kids Jr 4-6 år Hede Bystuga, Västanhede kl 18:30 - 19:30 ZUMBA Fitness ONSDAGAR Må Bättre, Avesta kl 10 - 11 ZUMBA Gold - lägre tempo, skonsam träning…	2016-09-28 09:27:53	1864		1	20	2	2	1	Y	2	1	1	YES	6		2
Public Place	1	Välkommen till Keramikutställning utöver konstrundan! Hela påskhelgen Klockan 11-17 NN, Avesta Keramiker Jag arbetar främst i stengods och lergods, skulpturer som jag även kombinerar med trä, metall och glas. Leran är för mig ”möjligheternas material”. Jag gillar att utmana den och provar ofta nya former, glasyrer, färger och egenskaper. Alla skulpturer och bruksföremål i varierande storlekar bli…	2016-09-28 09:30:11	1864		1	20	2	2	1	Y	2	2	1	YES	6	2	2
Public Place	2	• Kultur Föreläsning Fridolinsalen, Avesta bibliotek Tisdag 27/9 kl. 18.30 Ond, bråd död i Bryssel och Bergslagen. Indgrid Hedström, deckarförfattaren från Avesta berättar. Entré 50kr/biljett och förköp. Arrangörer: Avesta bibliotek i samarbete med Teaterföreningen och Sensus. SENSUS FOLKARBYGDENS TEATERFÖRENING AVESTA KOMMUN	2016-09-28 09:32:06	1864		1	12	1	1	1	Y	3	5	1	NO	4	4	2
Public Place	1	tjejzonen. Behöver du prata? Tjejzonen lyssnar på dig. Du får vara anonym om du vill. www.tjejzonen.se	2016-09-28 09:33:09	1864		1	24	1	1	1	Y	3	1	1	YES	2	1	2
Public Place	1	Skadar du dig själv eller har du gjort det? Är du 15–20 år? Vill du delta i en frivillig anonym undersökning? Undersökningen handlar om hur du som har eller haft självskadebeteende upplever bemötandet på ungdomsmottagningen. Intervjuerna är anonyma och ingen får veta vem du är eller vad du sagt. Om du vill avsluta ditt deltagande i undersökningen utan att den är klar får du göra det utan att förk…	2016-09-28 09:40:03	1864		1	24	8	1	1	Y	3		1	NO	6	2	2
Public Place	1	Linus barn- och ungdomsstöd Avesta För dig som är barn eller tonåring och har förälder/annan närstående som är beroende av alkohol eller andra droger.	2016-09-28 09:45:51	1864		1	24	1	1	1	Y	3	1	1	YES	6	1	2
Public Place	1	Servicecenter Projektet kommer under 2015 att arbeta med att på olika sätt förbättra Avesta kommuns service till medborgarna. Det kallas Servicecenter men kan liknas vid en kundtjänst och handlar om att på olika sätt att ge Avestabor en bättre service i deras kontakt med kommunen. Arbetet har föregåtts av två förstudier: E-tjänster och Kundreaktioner, den sistnämda har arbetat med grunderna för a…	2016-09-28 09:51:46	1864		1	24	4	1	1	Y	3	2	1	NO	5	4	2
Public Place	1	OM DU TROR ATT DU ÄR KORKAD, ÄCKLIG OCH ATT DU FÖRTJÄNAR NÅGRA KNYTNÄVSSLAG DÅ OCH DÅ... ...så misstänker vi på Polisen istället att du kan vara utsatt för ett allvarligt brott med den du lever med. Kanske har du fått höra hur ful och misslyckad du är så ofta att det har blivit en sanning? Kanske tvingas du bortförklara skråmor och blåmärken inför vänner och arbetskamrater? Kanske är din frihet s…	2016-09-28 16:06:18	1864		1	24	3	1	1	Y	2	1	1	YES	6	1	1
Public Place	1	VÅLD I NÄRA RELATION Är du kvinna och utsätts för slag, hot, trakasserier eller kontroll från din närstående? Det finns hjälp att få och du är inte ensam. Att leva i en relation där man blir slagen eller kränkt är ett allvarligt hot mot hälsa och säkerhet. Det är aldrig ditt fel att du blir slagen. Den som slår har alltid ansvar för de slag som utdelas. Olika psykologiska mekanismer kan göra att …	2016-09-28 16:43:33	1864		1	24	3	1	1	Y	2	1	1	YES	6	1	2
Private Place	1	UPPTÄCK STROKE I TID Misstänker du att någon nära dig har fått en stroke? Kontrollera följande: ANSIKTE kan personen le och visa tänderna? Om ena mungipan hänger - ring 112! KROPPSDEL ARM/BEN kan personerna lyfta armarna och hålla kvar dem i 10 sekunder? Om en arm faller - ring 112! UTTAL kan personen upprepa en enkel mening som "Det är vackert väder idag"? Om personen sluddrar eller inte hittar …	2016-09-28 09:41:58	1876		1	24	1	1	1	Y	3	1	1			1	2
Private Place	1	VI BLIR FLER... SOM GER MINDRE! TROTS ATT ANTALET BLODGIVARE ÖKADE UNDER 2012 SÅ MINSKADE ANTALET TAPPADE BLODENHETER. DET BETYDER ATT FLER ANMÄLDE SITT INTRESSE HOS BLODCENTRALERNA MEN ATT DE ALDRIG GICK DIT OCH LÄMNADE BLOD. VAR MED OCH GÖR SKILLNAD ANMÄL DIG SOM BLODGIVARE REDAN IDAG! Olycka	2016-09-28 10:36:55	1876		1	24	1	1	1	Y	3	2	1	YES	2	1	2
School	1	Gävlemodellen oktober 2015 Här kommer en analys och resultatsammanställning av kartläggningen som genomfördes på er skola Andelen mobbade elever utgår från den definition som användes i Skolverkets rapport 353. Elever som utsatts för upprepade(minst några gånger i månaden) negativa handlingar med syfte att såra/skada. I Skolverkets undersökning var resultatet 8,8 % i årskurs 4-6 och 7,7 % i årsku…	2016-09-28 09:55:15	1871		1	24	8	1	1	Y	2	1	1	NO	5	1	1
Supermarket	1	30/8-16 SAKNAD! NISSE - SVART/VIT KATT MED LITEN SVANS 5 cm FÖRSVANN 16/8 2016 FRÅN ARRENDEVÄGEN HAN ÄR KASTRERAD OCH ÖRONMÄRKT HAR NÅGON SETT HONOM? RING ### NN	2016-09-28 11:13:40	1858		1	9	7	1	1	Y	1	1	1	NO	1	1	2
Supermarket	1	FREDAGSDISCO!!! 30/9, 28/10, 25/11 Lilla teatern, Kulturhuset Komedianten Drop-in för dig som gillar dans och grym musik. Fri entré! 10.00-11.00 BabyDisco 0-3 år 12.00-13.00 LunchBeat 14.30-15.30 AfterDagisDisco 4-7 år (även småsyskon välkomna) 16.00-17.00 AfterSchoolDisco 8-12 år (inga vuxna) Kulturhuset Komedianten VARBERGS KOMMUN	2016-09-28 11:15:23	1858		1	20	1	2	1	Y	3	2	1	YES			1
Supermarket	1	3 BYTES vi har hiss Vi haren 3•a Vill ha en 4•a eller hus, stuga att hyra på Träslövsläge eller Gamlaköpstad. Vi har fasta jobb Vi är rökfria Vi har 2 barn 2+5 år. NN ### NN ###	2016-09-28 11:18:49	1858		1	5	7	1	1	Y	1	1	1	NO	1		1
Supermarket	1	Välkommen till Tvååker Föreläsningsprogram Hösten 2016 Föreläsningskvällar tisdagar, klockan 19.00 Entré: 40 kronor, skolungdom: 10 kronor. Tvååkers samarbetsorgaanistaion Ordförande NN tfn: ### Sekreterare NN tfn: ### Måndag före varje föreläsning finns en annons på Varbergssidan i Hallands Nyheter	2016-09-28 11:19:24	1858		1	12	1	1	1	Y	2	2	1	NO	1	2	1
Supermarket	1	Jogga hjärnan Spela Bridge ! Nybörjarkurser Dagkurs: Måndagar 13:30 Kvällskurs: Tisdagar 18:30 Kursstart 19/9 resp. 20/9 Anmälan: NN ### Kursavgift: 500 kr/termin exkl. kurslitteratur Albrekts Bridge www.bkalbrekts.se	2016-09-28 11:20:41	1858		1	20	1	2	1	N	2	4	1	YES	6	2	2
Supermarket	1	StoloBord Behöver du tält, bord och stolar? Hyr helt nya möbler och tält hos oss. Vi finns i Tvååker. Kontakta NN på: T ### E @@@ H stolobord.se	2016-09-28 11:23:09	1858		1	6	2	1	1	Y	2	2	1	YES	6	3	2
Other	1	Träslövsläge kyrka 2 oktober 10.00 Helige Mikaels dag Gudstjänst med dop Kyrkokören medverkar Svensson Söndagsskola Kyrkkaffe Välkomna!	2016-09-28 11:36:13	1858		1	17	1	1	1	Y	3	2	1	NO	4	4	2
Public Place	1	Vandring med Frälsarkransen i Träslövs kyrka. Kyrkan är öppen alla dagar kl. 9.00-19.00 Välkommen in!	2016-09-28 11:36:33	1858		2	17	1	2	1	Y	2	2	1	NO	4	4	2
Public Place	1	SUP YOGA VARBERG med yogaläraren NN SÖNDAGAR KL 11:00 BOKA PÅ: FAHLENSURF.se (under Kurser) ### I SAMARBETE MED: fahlensurf	2016-09-28 11:40:41	1858		2	20	1	2	1	N	3	2	1	YES	6	3	2
Public Place	1	Program NBV Varbergs kommun För Mötesplats, Storgatan 44 Träslövsläge. Tisdagar 14:00-16:00 23/8 Goa Gubbar 30/8 Sjöstjärnorna 6/9 Ingemar och Bengt, saxofon och dragspel 20/9 Frälsningsarmen 27/9 Ugglarps singers 4/10 NN berättar om spännande öde 18/10 Gurli underhåller Välkomna Frivilligverksamheten i Varbergs kommun	2016-09-28 11:42:08	1858		2	20	1	1	1	Y	2	1	1	NO	4	3	2
Public Place	1	Skjuts till kyrkogårdden i Träslöv Torsdagar med start 1/9 och fram t.o.m. 15/12 Första turen för dagen går från församlingshemmet i Träslövsläge kl.10.00 Vi samlas i barnlokalen en trappa ner. Ingen anmälan. Välkommen! Har du frågor om dagen? Ring så berättar vi mer! Församlingsexp. ### eller NN tel. ###	2016-09-28 11:42:36	1858		2	20	1	1	1	Y	2	2	1	NO	1	4	2
Public Place	1	TORSDAGSSOPPAN "Soppgänget" serverar sopplunch varje torsdag i Träslövsläge församlingshem med start den 1/9 och fram t.o.m. den 24/11 Soppan serveras mellan kl. 11.45- 13.00 "Torsdagssoppan" är en samling där vi får känna gemenskap med varandra, både gammal och ung. Du kan komma ensam eller med sällskap, Du kanske är nyinflyttad och vill bli bekant med någon. Sopplunchen inleds med MIDDAGSBÖN i …	2016-09-28 11:42:39	1858		2	20	1	1	1	Y	2	3	1	NO	4	4	2
Public Place	1	Då var det dags igen för Barn-, Junior- och Ungdomskörerna i Träslövsläge Sångfåglarna 5-7 år torsdagar kl. 16.00-16.45 Korallerna 8-12 år – torsdagar 16.45-18.00 Kristallerna 13 år – måndagar kl. 14.45-16.15 Var? I Träslövsläge församlingshem (ingång blå dörren mot parkeringen),vi börjar denna veckan, v. 34 alltså 22 och 25 augusti. Sångfåglarna kan vi hämta vid skolan om någon önskar och då häm…	2016-09-28 11:44:49	1858		2	20	1	2	1	Y	2	3	1	NO	1	4	2
Public Place	1	Välkommen till Adventskyrkan! Vi samlas lördagar för att fira gudstjänst och studera Bibeln. 10.00 Bibelsamtal 11.15 Gudstjänst. Se www.kyrkotorget.se/adventskyrkan.norrkoping för aktuell predikotur! 13.00 Escuela Sabática (spanska) 15.00 Segundo Servicio (spanska) Se www.adventistanorrkoping.org för aktuell information! www.norrkoping-adventist.se @@@ ###	2016-09-28 11:46:25	1909		2	17	1	2	1	Y	3		1	YES	6	4	1
Other	1	Sitsträningsschema tisdag 20/9 Skritta fram 10 min före er tid, skritta av ca 10 min efteråt. Pallen kommer att finnas tillgänglig för att öva kroppskontroll och värma upp rörligheten i mellandelen på. 17:30 NN & NN Coreef NN & NN Griga NN & NN Charlie 18:30 NN & NN Irvin NN & NN Candy NN & NN Janne 19:10 NN & NN Barabas NN & NN Lordi NN & NN Alfons 19:50 NN, NN & NN Qula NN, NN & NN Challe NN, N…	2016-09-28 11:53:51	1909		1	24	1	2	1	N	2	1	1	NO	5		1
Supermarket	6	Vinnare av "The Award for the best Speciality Market in the UK" ORIGINALET International STREET MARKET *** 21-24 SEPTEMBER STORTORGET, ÖRNSKÖLDSVIK WWW.MATMARKNAD.NU	2016-09-28 19:14:09	1863		2	20	1	1	1	Y	3	5	2	YES	6	4	2
Supermarket	1	Motionsdans Åte lokalen Söndagen den 2 oktober klockan 18.00 – 21.00 Musik; Serenad Välkommen! Inträde 120,- Vi bjuder på fika PRO Själevad Hemsida: www.pro.se/sjalevad	2016-09-28 19:21:42	1863		2	20	1	2	1	N	2	3	1	YES	2	2	2
Supermarket	2	FINSKA DRAGSPELSLEGENDEN VEIKKO AHVENAINEN CARINA NORDLUND GIDEÅGÅRDEN Torsdagen 6/10 kl. 19.00 KOM OCH LYSSNA TILL DRAGSPELS-KLASSIKER, POPULÄRA TANGO, VALSER, POLKA M.M VÄLKOMMEN TILL HÖSTENS DRAGSPELSKONSERT! Biljetter 100:-	2016-09-30 12:10:27	1863		2	20	1	2	1	Y	3	2	1	NO	4	3	2
Supermarket	2	Kakbuffé 7 oktober kl. 13-16 På Ödbergska gården. All försäljning går till världens barn. Personskadeförbundet RTP fyller 70 år! Det vill vi fira med en kakbuffé på mysiga Ödbergska gården. Skyttegatan 3, Ö-vik. Hembakat såklart! Lotteri! Utställning av NN 50 kr. vuxen, 20 kr. barn. Kontant/Swisch. PERSONSKADEFÖRBUNDET RTP. Örnsköldsviks lokalförening sensus	2016-09-30 12:13:08	1863		2	20	1	2	1	Y	3	5	1	NO	4		2
Supermarket	1	Yoga för Barn Nu är det dags att anmäla till Barnyoga 4-7 år. Det blir fem tillfällen i Östängs Småskola med början torsdag 15/9 och därefter följande torsdagar, 6/10, 27/10, 2/11, 10/11 Kl.17.15–18.15. Vi kommer att gå på magiska sagoäventyr med yogarörelser,göra andningsövningar, göra rörelser med yogakort och vi avslutar alltid med en stunds avslappning. Vi ska ha kul tillsammans. Pris 450:- f…	2016-09-28 19:31:18	1880		1	3	2	2	1	Y	2	4	1	NO	1		2
Supermarket	1	ÅTERKOMSTEN SOLLERÖN 25 ÅR NN NN NN PysiGreta Babsan och Kvällens gäst! Kommunalhuset Sollerön endast 3•4•5 nov Bilj: 280 kr (Obs! Bli medlem i EJNAR!)	2016-09-28 19:35:20	1880		1	20	1	2	1	Y	3	2	1				2
Supermarket	1	LOPPIS 10-15 Lör-Sön Kolan Blått hus/ ___ gatan 35	2016-09-29 10:57:06	1872		1	2	7	2	1	Y	1	1	1	NO	4	1	1
Supermarket	1	STYRKA/KONDITION onsdagar 19:00-20:00 söndagar 18:00-19:00 Fors skola Vecka 35-49 Alla är välkomna! Eventuella frågor besvaras av NN telefon ###.	2016-09-29 10:59:48	1872		1	20	1	2	1	Y	2	1	1	NO	1	1	2
Supermarket	1	GÅRDSLOPPIS i LYCKA FORS I Lagå´rn SÖNDAG 25 SEPTEMBER 10:00-15:00 Flera säljare Bruksföremål Antikt o Kuriosa. Loppis nytt o gammalt. KOM O FYNDA !! Hyr Plats Sälj själv Info ###.###	2016-09-29 11:03:46	1872		1	2		2	1	Y	2	1	1	NO	6		1
Supermarket	1	Har du Social Fobi? Självhjälpsgrupp (Våga Prata grupp) Börjar snart i Falun. För mera information se energicirkeln.com. Eller ring ### efter kl. 13. Anmäl dig på hemsidan eller på ABF:s sida. Energicirkeln I samarbete med ABF GÖR EN ANNAN VÄRLD MÖJLIG	2016-09-29 11:08:41	1872		1	24	1	1	1	Y	3	1	1	YES	6	1	1
Supermarket	1	TRUMRESA Nu kommer trumbjörnen till Avesta! Missa inte detta tillfälle! Lördag 22:a oktober 11.30-ca 17.00 IOGT-NTO lokalen i Nyhyttan Vi bjuder på fika Anmälan senast 17oktober till NN telefon: ###	2016-09-29 11:09:40	1872		1	20		2	1	Y	2	2	1	NO	6	1	2
Supermarket	1	Stiga Gräsklippare. Med uppsamlingskorg. Behöverses över. 500:- Fins i Skogsbo.	2016-09-29 11:13:00	1872		1	2	7	2	1	Y	1	1	1	NO	1	1	2
Supermarket	3	• Kultur Föreläsning Fridolinsalen, Avesta bibliotek Tisdag 27/9 kl. 18.30 Ond, bråd död i Bryssel och Bergslagen. Indgrid Hedström, deckarförfattaren från Avesta berättar. Entré 50kr/biljett och förköp. Arrangörer: Avesta bibliotek i samarbete med Teaterföreningen och Sensus. SENSUS FOLKARBYGDENS TEATERFÖRENING AVESTA KOMMUN	2016-09-29 11:13:11	1872		1	12	1	2	1	Y	3	5	1	NO	4	1	2
Supermarket	1	www.avesta.se Avesta satsar på Outdoor! Vi vill därför få reda på dina tips på bra aktiviteter i vår kommun och önskemål på vad som saknas eller kan bli bättre för att kunna fortsätta att utveckla Avesta outdoor. Under #avestaoutdoor tipsar vi varandra via sociala medier om sköna outdoorställen och aktiviteter. På www.avesta.se/outdoorkartan ka du lämna önskemål på nya aktiviteter och pricka ut d…	2016-09-29 11:13:30	1872		1	24	4	2	1	Y	3	2	1	YES	2	1	2
Supermarket	1	JB Kakel & Klinkers Är du i renoveringstankar? Eller vill du bara förnya ditt hem? Då skall du kontakta JB Kakel & Klinkers Vi är en firma som finns etablerad i Avesta, men utför arbeten även på andra orter. Vi på JB Kakel & Klinkers har utbildning och flerårig erfarenhet inom plattsättning Vårt företag har våtrumscertifikat, vilket innebär att du med förtroende kan låta oss ta hand om din tvätts…	2016-09-29 11:15:15	1872		1	3	2	2	1	Y	2	1	1	NO	1	3	2
Supermarket	1	Beg. Symaskin Husqvarna. Pris 500 KR	2016-09-29 11:16:08	1872		1	2	7	2	1	Y	1	1	1	NO	1	1	1
Supermarket	1	TILL SALU CYKLAR SPEED VIT 26' 15 VÄX- 500 kr MONARK MTB 21 21 VÄX.- 800 kr TEL. ###	2016-09-29 11:19:29	1872		1	2	7	2	1	Y	1	1	1	NO	1	1	1
Supermarket	1	SNC TAK&BYGG LTD. ### SNCTAK&BYGG __väg 16B KRYLBO NN BYGGLEDARE	2016-09-29 11:19:43	1872		1	3	2	1	1	Y	3	4	1	NO	6	4	2
Supermarket	1	Picknick på slagfältet av Fernando Arrabal Regi: Thomas Herrgård PREMIÄR 24/9 19.00 Övriga speldagar 25/9 15.00, 28/9 19.00 1/10 15.00 och 19.00 2/10 15.00 BILJETTER: ### BERGSLAGS- Teatern www.bergslagsteatern.se	2016-09-29 11:20:53	1872		1	20	1	2	1	Y	3	2	1	YES	6	3	2
Supermarket	2	20-års jubileum Antik- och Samlarmässa Välkommen till Samlarmässan med Antikt och Kuriosa Cupolen, Avesta Folkets Park Lördag 15/10 Kl. 9.30-15.00 Fri entré Arrangör: Södra Dalarnas Myntklubb	2016-09-29 11:21:04	1872		1	20	1	2	1	Y	2	2	1	NO	4	3	2
Supermarket	1	Falun Dafa (Falun Gong) En traditionell självkultiveringmetod för kropp och sinne. Sanning Godhet Tålamod www.falundafa.org Falun Dafa lärs ut kostnadsfritt.	2016-09-29 11:23:24	1872		1	20	1	1	1	Y	3	2	1	YES	2	1	2
Supermarket	1	Sjätte sinnet NN Medium, Healing,###	2016-09-29 11:23:37	1872		1	24	7	1	1	Y	3	2	2	NO	1	3	2
Supermarket	1	Bord rund 110cm med ilägsskiva. 4 stolar med dyna, Körsbärsfärgad. något defekt. Kan målas om. 650 kr. eller bud. Fins i Skogsbo.	2016-09-29 11:26:23	1872		1	2	7	2	1	Y	1	1	1	NO	1	1	2
Supermarket	1	ZUMBA kids SLÄPP LOSS DANSGLÄDJEN! Markusskolan 7-11 år måndagar 17:30 Hede bystuga 4-6 år tisdagar 17:30 information och anmälan: www.achson.com NN ### START 29 aug 2016	2016-09-29 11:26:31	1872		1	20	1	2	1	N	3	2	1	YES	6	3	2
Supermarket	1	leparse.com leparse LE PARSE leparsea smycken och accessoarer	2016-09-29 11:28:28	1872		1	2	2	2	1	Y	2	2	1	YES	6	1	2
Supermarket	1	Säljes Fin 3växlad Merida Herr Cykel med Vinternya däck Ca: 750kr. Motorsåg Husqvarna 133 Ca:400kr	2016-09-29 11:29:21	1872		1	2	7	2	1	Y	1	1	1	NO	1	1	1
Supermarket	1	ZUMBA gold START 1 sept 2016 DANSA DIG I FORM - TRÄNA I DIN EGEN TAKT! PRO-gården Krylbo torsdagar Sittande kl 14-14:30 Övriga kl 15-15:45 Anmälan och information: NN tel ### www.achson.com	2016-09-29 11:31:33	1872		1	20	1	2	1	N	3	2	1	YES	6	3	2
Supermarket	1	TILL SALU NISSAN-NOTE BESIKTAD SKATTAD GÅTT 14.000 MIL GÅR BILLIGT TEL ###	2016-09-29 11:32:14	1872		1	2	7	2	1	Y	1	1	1	NO	1	1	1
Supermarket	1	Södra Dalarnas Juridik NN, Jur. Kand. Telefon: ## E-post: @@@ Hemsida: www.sdj.nu Besöksadress: Karlfeldtsgården, Brunnbäcksvägen 50, Krylbo	2016-09-29 11:33:06	1872		1	3	2	1	1	Y	3	2	1	YES	6	1	2
Supermarket	1	Hösten 2016 - Korskrogens Bygdegård - För alla åldrar Kom ensam eller parvis Danskurser i Avesta Bugg Helgkurs: Lö 10 sep. & sö 11 sep. kl 10-16 Enkelt och roligt! Inga förkunskaper krävs! Den perfekta Buggkursen för dig som snabbt vill prova på/lära dig dansa Bugg med den moderna "Åhej"-tekniken. Bugg Fortsättningsgrupp: Onsdagar (6 alt. 12 veckor) Start 14 sep. kl.19.00 – 21.30 Ytterligare tekn…	2016-09-29 11:37:04	1872		1	20	1	2	1	N	3	5	1	YES	6	1	2
Supermarket	1	Plantainca Odlingsbutiken med det spännade sortimentet! Hos oss hittar du: Fröer till Exotiska och Tropiska växter och Perenner. Vi har ett stort utbud av Hoya Porslinsblommor. Kokosfiber Lavagrus Perlite Etiketter Krukor Ergonomiska trädgårdsredskap Välkommen till vår webshop plantainca.se	2016-09-29 11:39:28	1872		1	2	2	2	1	Y	2	2	1	YES	2	3	2
Supermarket	1	hrf. Hörselskadades förening i Gävle Dags _ör ett hö_seltest? Lördag 15 oktober kl 10.00 - 15.00 kan du GRATIS testa din hörsel under dagen på Tullbomsgården, S.Kopparslagarg. 7, Gävle Utställare och informatörer: Slingteknik, Phonak, Hörteknik och Tolkcentralen finns på plats och visar samt informerar om sina hjälpmedel som gör DIN vardag lättare Skrivtolkar finns på plats hela dagen Försäljning…	2016-09-29 07:33:15	1871		1	19	1	2	1	Y	3	3	1	NO	4	3	2
Public Place	3	MATRÄTTEN – för allas rätt till mat NN är två år gammal. Hon är en av 795 miljoner människor som ofta äter för lite, för näringsfattigt och för sällan. Trots att mat är en mänsklig rättighet. Trots att jordens resurser skulle kunna föda oss alla. Var med och bekämpa en av världens största orättvisor! SMS:a MAT till 72905 och ge 100kr FÖR ALLAS RÄTT TILL MAT Swisha valfritt belopp till 9001223 PG …	2016-09-29 07:34:46	1944		1	24	1	1	1	Y	3	2	1	NO	5	2	2
Other	1	Vänner, skratt och shopping i en härlig kombination! Gå in på www.meandi.se och läs mer om Personal shopping när den är som bäst. me&i www.meandi.se	2016-09-29 09:48:57	1922		1	3	2	2	1	Y	2	2	1	YES	2	3	2
Other	1	Öppet Hus start 12 sep i Bygdegården måndagar 9.30-11.30 Välkommna alla små barn tillsammans med någon vuxen. Lek, pyssel, sångstund och fika. Ingen anmälan behövs! Morups Församling	2016-09-29 10:04:15	1922		1	20	1	2	1	Y	2	3	1	NO	4	1	2
Supermarket	1	MINITENNIS/TENNISLEKIS HT16 Hej alla minitennis/tennislekis föräldrar! Succen fortsätter även under hösten 2016! Ta chansen och anmäl ditt barn redan nu! GTK fortsätter sin minitennisverksamhet under hösten 2016. Med start v.36 kommer vi köra minitennis/tennislekis Tisdagar klockan 17:10- 17:50. Torsdagar kl 17:00-17:40, 17:40-18:20 eller 18:20-19:00. Succen med tennislekiset fortsätter under hös…	2016-09-29 10:32:36	1871		1	20	1	1	1	Y	2	2	1	NO	6	1	2
Supermarket	1	BIBLIOTEK Sagostund Högläsning, dramatiseringar, sånglekar, rim & ramsor. Med NN & NN. Från 3 år. Stadsbiblioteket, Narnia Onsdagar kl 10.15 14 september-30 november Gävle bibliotek www.gavle.se/bibliotek	2016-09-29 10:34:34	1871		1	20	1	2	1	Y	3	2	1	YES	2	1	2
Supermarket	1	Prylar tages tacksamt emot till Hille missionsförsamlings kommande Loppmarknad Ring så hämar vi snarast ###	2016-09-29 10:35:27	1871		2	24	1	2	1	Y	2	1	1	NO	1	3	1
Supermarket	1	yoga Yoga för barn och ungdomar! Barnyoga 7–10 år Kursstart 24 september, kl 10.00–11.00 Tonårsyoga 13–16 år Gratis prova-på 25 sept, kl 17.00–18.15 Kursstart 6 oktober, kl 19.00–20.15 Anmälan www.gavleyogaskola.se Frågor @@@	2016-09-29 10:36:08	1871		1	20	2	2	1	Y	3	4	1	YES	6	1	2
Supermarket	1	KENDAMA OF SWEDEN Kendama of Sweden bildades 2016. Syftet med företaget är att få sporten att växa och att utveckla sporten i Sverige. Vi står mot mobbning. Och vi ska behandla varandra med respekt och kärlek.	2016-09-29 10:36:35	1871		1	20	1	2	1	Y	3		1			3	2
Supermarket	1	Det här är Bob. Han och hans husse och matte är i behov av hjälp i form av en promenad en gång om dagen vardagar. Tiden för promenad ska helst ske runt 11-12 tiden måndag-fredag då vi som ägare båda jobbar dagtid. Vi vill helst ha någon som kan gå regelbundet tillsvidare. Vi bor mitt i Hille så det vore lämpligt om du bor någonstans i närheten Självklart erbjuds ersättning och det kommer vi övere…	2016-09-29 10:36:44	1871		2	3	7	2	1	Y	2	2	1	NO	1		1
Supermarket	1	Mot ett friskare liv! Välkommen på en inspirerande hälsoföreläsning! Du får lära dig om vilka val du kan göra för att öka möjligheten till ett friskare och längre liv. Vår tids sjukdomar orsakas till 80% av inflammation i kroppen. Exempel är mag-/tarmsjukdom, cancer, hjärt-/kärlsjukdom, stroke, diabetes, allergi, depression, alzheimer mm. Inflammation byggs upp under lång tid och pågår långt inna…	2016-09-29 10:37:48	1871		2	12	1	1	1	Y	2	2	1	NO	6	1	2
Supermarket	1	SOM DU. SOM DOM. SOM JAG. MANUS OCH REGI NN URPREMIÄR DEN 22 OKTOBER 2016 GÄVLE, FOLKTEATERN	2016-09-29 10:38:20	1871		1	20	1	2	1	Y	3	2	1				2
Supermarket	2	Thomas DiLeva HJÄRTAT VINNER ALLTID HILLE KYRKA, GÄVLE SÖNDAG 30 OKTOBER KL 18:00 MED HILLE KYRKOKÖR OCH UNGDOMSKÖRERNA HOPPET & KRAM UNDER LEDNING AV NN BILJETTER WWW.DILEVA.SE/BILJETTER GÄVLE TURISTCENTER ###	2016-09-29 10:38:39	1871		2	20	1	2	1	Y	3	2	1	YES	6	3	2
Supermarket	2	hrf. Hörselskadades förening i Gävle Dags _ör ett hö_seltest? Lördag 15 oktober kl 10.00 - 15.00 kan du GRATIS testa din hörsel under dagen på Tullbomsgården, S.Kopparslagarg. 7, Gävle Utställare och informatörer: Slingteknik, Phonak, Hörteknik och Tolkcentralen finns på plats och visar samt informerar om sina hjälpmedel som gör DIN vardag lättare Skrivtolkar finns på plats hela dagen Försäljning…	2016-09-29 10:38:50	1871		1	19	1	2	1	Y	3	3	1	NO	4	3	2
Public Place	1	STRÖMSBRO 22/9 TORSDAG 9:30 Strömsbro församlingshus Morgonbön, fika och därefter bibelsamtal kring kommande söndags texter. NN. 18:30 VECKOMÄSSA Strömsbro kyrka NN, NN 24/9 LÖRDAG 17:00 Se Be Ge–Festkväll till förmån för missionen Strömsbro församlingshus Vi kommer att äta tillsammans och följa webbsändningen på efsplay. Kostnad 100 kr – gärna mera – hela behållningen går till EFS 24 timmarsinsa…	2016-09-29 10:39:17	1871		1	17	1	1	1	Y	3	2	1	YES	6	3	2
Supermarket	1	KATTEN JANSSON HAR VARIT BORTA SEN 21/6. HAN HÖR HEMMA PÅ __STIGEN 15. KAN HA BLIVIT INSTÄNGD NÅGONSTANS. SÅ SNÄLLA, TA EN TITT I ERA FÖRRÅD. HAN ÄR SKYGG AV SIG! SER NI HONOM SÅ RING MIG... NN ### TACK! 10/7 - 16	2016-09-29 10:39:26	1871		2	9	7	1	1	Y	2	2	1	NO	1	1	2
Supermarket	1	Frisörsalong(Stigslund) Stigsrundan 25 Drop in &beställning Tel:### Klippning från 150:- Barn 150:- Pensionärer Dam 180:- Herr 150:- Utför Permanent,Slingor&färg Vällkommen!	2016-09-29 10:39:42	1871		2	3	2	1	1	Y	2	1	1	NO	6	1	1
Supermarket	1	HÖSTLOPPIS Gamla IOGT-NTO på Brännerigatan i Strömsbro Lördagen 3 september kl.10-13 Söndagen den 4 september kl.10-13 Försäljning av barnkläder, skor leksaker och inredning. Fikaförsäljning! swish	2016-09-29 10:40:19	1871		2	2		2	1	Y	3		1				2
Supermarket	1	Ingmar Bergman Se film – tala liv! Välkommen till filmkvällar med samtal i Heliga Trefaldighets kyrka Höstens tema är Ingmar Bergman Fem onsdagskvällar – fem filmer 18.45-21.30: 31/8 Smultronstället 28/9 Nattvardsgästerna 26/10 Tystnaden 23/11 Det sjunde inseglet 21/12 Fanny & Alexander Kvällarna innehåller en introduktion av filmen, gratis filmvisning, samtal och servering av enklare kaffe till …	2016-09-29 10:41:20	1871		2	20	1	2	1	Y	3	2	1	YES	6	3	2
Supermarket	1	Stoppa de grymma djurtransporterna Bidra inte till djurs lidande. Välj vego. Beställ kostnadsfritt vår inspirerande tidning Välj Vego! SMS:a VEGO till 72 120.	2016-09-29 10:41:51	1871		1	23	1	1	1	Y	3	2	1	NO	1	1	2
Supermarket	1	RASTPLATS "Måste gå min egen väg" 25 sept kl 16 Hille Kyrka NN talare Ungdomskörerna Kram & Hoppet SVenska kyrkan I HILLE	2016-09-29 10:42:06	1871		1	20	1	2	1	Y	3	2	1	NO	4	3	2
Supermarket	1	Upphittat Solglasögon återförenas mot beskrivning Tel. ###	2016-09-29 10:43:16	1871		1	10	7	1	1	Y	2	1	1	NO	1		1
Public Place	1	VETERANTRAKTORTRÄFF Svinö bygdegård 23 juli 2016 Kl 10.00 10.00 Veterantraktorplöjning 12.00 Sjungande Bonden med piga och drängar 13.30 Parallellslalom med gamla traktorer– anmälan görs på plats Veterantraktorutställning För barnen – tur med traktor och vagn, i sällskap med vuxen Servering med hamburgare, korv, hembakt, läsk och kaffe	2016-09-29 10:48:45	1864		2	20	1	2	1	Y	2	4	1	NO	4	3	1
Other	1	Föreningen Hillesjöns Framtid För bevarande av Hillesjön Föreningen Hillesjöns Framtid Hillesjön är en viktig källa för rekreation och naturupplevelser med fågelliv, fiske, bad, båtliv och natur i Gävles närhet. Föreningen Hillesjöns Framtid bildades år 2006 för att bevara Hillesjön som en öppen och tillgänglig sjö och arbeta aktivt mot igenväxning. Föreningens verksamhet bedrivs av våra medlemma…	2016-09-29 10:45:04	1871	1	2	20	1	1	1	Y	3	2	1	YES	6		2
Supermarket	1	FLYTTSTÄDNINGAR Flyttstädningar och flyttar av hela hem utförs av personer med stor erfarenhet i städ- och flyttbranschen. Fasta priser och städgaranti erbjuds! För förfrågningar och bokningar ring ###. Har F-skattsedel. 1a 2300 kr 2a 2600 kr 3a 2900 kr 4a 3200 kr Vi flyttstädar även radhus och större hus, ring för prisuppgifter. Referenser finns. Rabatt ges vid bokning av flytt+städ. Flyttstädni…	2016-09-29 10:45:34	1871		1	3	2	1	1	Y	2	1	1	NO	1	1	1
Public Place	1	Freak Park Market. Street Festival 27/8 fr. kl. 16.00 Gruvplan SÄTER	2016-09-29 10:54:52	1872		2	20	1	2	1	Y	3	4	1	NO	4	3	2
Public Place	1	BLACK PIKE FAVORITES PRESENTS STONERIDER HOLOGRAMEUROPEAN TOUR 2016 GARAGET /AVESTA 23/9 www.stoneriderband.com | www.blackpikefavorites.com	2016-09-29 10:57:56	1872		2	20	2	2	3	Y	4	4	1	YES	6	3	2
Public Place	1	JUBILEET Regi: NN -en munter pjäs om ett jubileum i kaos! Friluftsscenen vid Husby Hembygdsgård, Dala-Husby Lördag 2 juli - söndag 10 juli www.husbybygdespel.se PREMIÄR Lördag 2 juli kl 16 Söndag 3 juli kl 16 Tisdag 5 juli kl 19 Onsdag 6 juli kl 19 Fredag 8 juli kl 19 Lördag 9 juli kl 16 Söndag 10 juli kl 16	2016-09-29 11:00:14	1872		2	20	1	2	1	Y	3	4	1	YES	6	3	2
Public Place	1	ISABELLA LÖVIN SOMMARTALAR Markustorget i Avesta Lördag 20 augusti klockan 13 Aktiviteter för barn och vuxna på torget från klockan 11 Miljöpartiets språkrör Isabella Lövin miljöpartiet de gröna	2016-09-29 11:02:02	1872		2	20	1	1	1	Y	3	2	1	NO	4	3	2
Public Place	1	Drifters. TORP AVESTA 30/7 NÖJESKÄLLAN CAVALIERE	2016-09-29 11:02:55	1872		2	20	2	2	1	Y	3	2	1	YES	6	2	2
Public Place	1	Fiske o Jakt Välsorterad Butik, här hittar du allt. Björns FISKE & JAKT Havsfiske, Spinnfiske,Flugfiske,Luft-jaktvapen,hummertinor,mm. Strandvägen 14 ### Stenungsund	2016-09-29 10:57:03	1891		2	2	2	1	1	Y	3	1	1	NO	6	3	1
Public Place	2	JUL PÅ JORDHAMMAR Klassiskt julbord med inspiration från Bohuslän JULBORD 26 Nov – 18 Dec TORSDAGAR kl. 19 595:- 1/12, 8/12, 15/12 FREDAGAR kl. 19 595:- 2/12, 9/12, 16/12 LÖRDAGAR kl. 13 & 18 595:- 26/11, 3/12, 10/12, 17/12 SÖNDAGAR kl. 13 & 17 495:- 27/11 4/12 11/12 18/12 Sällskap upp till 220 pers RESTAURANG Jordhammars HERRGÅRD anno1855 BOENDE, FEST & BRÖLLOP ### www.jordhammarsherrgard.se	2016-09-29 11:09:14	1891		2	3	2	1	1	Y	3	5	1	YES	6	3	2
Public Place	2	LYCKORNA BRYGGA PRESENTERAR STOLT EN GLITTRANDE SKÄRGÅRDSJUL MED SHOW SISTERS TJEJERNA SOM TAGIT VÄSTKUSTEN MED STORM LYCKORNA BRYGGA ETABL 1877 RESTAURANG & BAR Nov 25, 26. 595:- Dec 2, 3, 9, 10, 15, 16, 17 Julbord utan show kl. 14 sönd 11 Dec 445:- BOKA NU PÅ: @@@ TEL: ###	2016-09-29 11:15:28	1891		2	20	2	2	1	Y	3	2	1	NO	6	3	2
Public Place	2	HÖST på Jordhammars Herrgård SEPTEMBER Fre 23 MUSIKQUIZZ med RONNY SVENSSON från Filmkrönikan Max 6 i varje lag 195:– inkl. Varmrätt OKTOBER Fre 7 FAMILJEAFTERWORK Trubadurerna Lennart & Martin Trollkarl Barnbuffé kl1 7-23 Fre 14 AFTERWORK med BODHISATTVA Buffé och 60-70-talsmusik 195:– kl 17-23 Lör 15 VILTWEEKEND från kl 18 Fre 28 MUSIKQUIZZ med RONNY SVENSSON från Filmkrönikan Max 6 i varje lag…	2016-09-29 11:18:56	1891		2	3	2	1	1	Y	3	5	1	YES	6	3	2
Public Place	2	GET READY TO ROCK! 60-TALS ROCKKVÄLL TILL ZIGHT OCH SOB Lördag 22 oktober kl 19.30-23.00 Kulturhuset Fregatten Entré 50 kr, biljetter endast vid dörren. Arrangör: Bygdegillet Stenungsund	2016-09-29 11:20:57	1891		2	20	1	1	1	Y	3	2	1	NO	4		2
Public Place	1	HÖST- MARKNAD FAMILJEDAG LOPPIS LÖR 24 SEP KL 11-15 PÅ RAON NORR OM STENUNGSUND Tovat, stickat, hembakat, grönsaker, växter... Ponny/åsneridning, kaninklappning, hoppborg och poängpromenad. Serveringen är öppen! Grillat, våfflor, kaffe, fika Boka bord på @@@ Fri parkering och fritt inträde för besökande Telefon: NN ### Mer info på www.bygdegillet.com	2016-09-29 11:23:38	1891		2	20	1	1	1	Y	3	2	1	YES	6		2
Public Place	1	DANSKURSER HÖSTEN 2016 ÖDSMÅLS BYGDEGÅRD 8/9 Bugg nybörjare 8ggr 18.00 – 19.30 Steg 1 19.30 – 21.00 Steg 2 20.15 – 21.45 400:-. Anmälan ### 21/9 Gillesdans 9ggr. forts. 19.00-22.00 400:-eller 50:-/gång. Sture ### SPEKERÖDS BYGDEGÅRD 11/9 Squaredans 9ggr 11.00-13.00 20/9 Gammaldans grundkurs 9ggr 19.00-21.00 400:- eller 50:-/gång. NN & NN. ### www.bygdegillet.com Studieförbundet Vuxenskolan	2016-09-29 11:24:45	1891		2	20	1	1	1	Y	3	3	1	YES	6		2
Other	1	TENNISRACK SÄLJES! – WILSON PRO STAPP 26 – WILSON US OPEN – TECHNIFIBRE 260 gr – TENNISBAG PRINCE – TENNISKJOL BLÅ FRED PERRY STORLEK -35 KONTAKTA NN ###	2016-09-29 10:58:05	1891	3	1	2	7	2	1	Y	1	2	1	NO	1	1	2
Other	1	NÄRHÄLSAN NÖSNÄS REHABMOTTAGNING VÄSTRA GÖTALANDSREGIONEN Närhälsan Nösnäs Rehabmottagning Till oss söker du som du har en motions- eller idrottsskada. Här arbetar sjukgymnaster med vidareutbildning inom Svensk Idrottsmedicinsk förening. Det behövs ingen remiss för att komma till oss. FÖr tidsbokning ring ###. Besöket kostar 80 kr. Frikort gäller. Barn under 20 år kostnadsfritt Vi finns i Sundaha…	2016-09-29 11:08:38	1891	3	1	19	8	1	1	Y	2	1	1	YES	6	1	2
Other	1	Meddelande till Stenungsunds Tennisklubb Här kan du skriva ner förbättringsförslag, information eller övriga synpunkter till som du har på tennisklubbens verksamhet. Vi kommer att ta upp ditt meddelande på nästkommande styrelsemöte. Tack för ditt bidrag! Styrelsen	2016-09-29 11:14:07	1891	3	1	24	1	1	1	Y	2	1	1	NO		1	1
Other	1	Strängning av tennisracketar Typ av sena Kostnad Kommentar Babolat RPM Blast (1.30 mm) 250:- Svart sena med bra spinn, kraft och känsla. Babolat Xcel Power (1.30 mm) 220:- Vit sena med kontroll och god känsla. Head Sonic Pro (1.25 mm) 180:- Vit sena med god kontroll och hållbarhet. Prince Synthetic Gut Duraflex (1.30 mm) 180:- Gul sena med god kontroll och hållbarhet. Prince Synthetic Gut Durafle…	2016-09-29 11:26:20	1891	3	1	3	2	1	1	Y	2	1	1	NO	1	1	1
Public Place	2	Jularbo-dagen 2016 EN KONSERTDAG MED HUVUDVIKT PÅ CALLES OCH EBBES MUSIK ÅRETS MEDVERKANDE: PETER HARRYSON Från ”Så ska det låta” och ”Rederiet” Gitarrist BENGT MAGNUSSON NILS FLÄCKE LEIF GÖRAS MED VÄNNER ANDERS LARSSON LINDA KARLSSON STOCKHOLM ACCORDION CLUB Programledare: Lena Jularbo_Brauner och Håkan Pettersson AVESTA TEATER Frejgatan 1, 774 41 Avesta Lördagen den 5 november 2016 kl. 13.00 Bi…	2016-09-29 11:06:51	1864		2	20	1	1	1	Y	3	2	1	NO	6	3	2
Public Place	1	HEDEMORA BLUES JAM OPEN STAGE Perfect Blue Sky JANE KITTO, AUSTRALIA/PNA ANDERSSON, SWEDEN Husband: Annas blueskok NN NN NN NN 1 okt från kl 14 Kom med ditt instrument/och eller din röst. Backline och husband finns. OBS! Jammare - kom i god tid! Alla under 18 år i målsmans sällskap. Facebook: Hedemora Blues Jam Fri entré med bidrag till mjölkkrukan välkomnas Swish ### @Kings Arms • Hedemora • ###	2016-09-29 11:11:09	1864		2	20	1	2	1	Y	3	2	2	NO	6	3	2
Public Place	1	VÄLKOMNA på kvartersloppis i Folkärna Lördag 9 juli kl. 10-14 på Lärkvägen, Fasanvägen och Källarbacksvägen. Info. ###	2016-09-29 11:13:35	1864		2	2		2	1	Y	2	3	1	NO	1	3	2
Public Place	1	LOPPIS FORS FOLKETS HUS LÖRDAG 3 SEPTEMBER KL. 10.00 - 15.00 VILL DU BOKA BORD? INOMHUS 200:-/ BORD (1,80X80 CM) UTOMHUS 100:-/PLATS BAKLUCKELOPPIS BOKNING: ### INFO: ### NN ### NN FIKA OCH KORV SÄLJS VÄLKOMNA!	2016-09-29 11:16:24	1864		2	2	1	2	1	Y	2	2	1	NO	6	3	1
Public Place	1	JAKTSKYTTETÄVLING FOLKAREMÄSTERSKAPEN PÅ FORNBY JAKTSKYTTEBANA På Fornby jaktskyttebana har du under lördagen 1/10 och söndagen 2/10 sista chansen att delta i Folkaremästerskapen i jaktskytte. Tävlingen går i följande klasser: Öppen (allmän) och veteran (från 56 års ålder) samt lagtävling Startavgift 20:-/skytt Välkomna! Fornby Jaktskytteklubb	2016-09-29 11:21:22	1864		2	18	1	2	1	Y	2	2	1	NO	4	3	2
Public Place	1	Janne Johansson & Friends i Centrumkyrkan, Avesta Bjuder in till en Bluegrass och Gospelkonsert söndagen den 3 juli kl: 19.00 Janne Johansson flyttade till USA för ca 30 år sen från Skellefterå, där han sedan började spela bluegrass på allvar, men är nu här igen och hälsar på och med sig har han 3 st vänner från det stora landet i väster. De är mycket etablerade musiker med stor skicklighet på si…	2016-09-29 11:25:41	1864		2	20	1	2	1	Y	2	2	1	NO	4	3	2
Public Place	1	LOPPIS LYCKA 10:00-15:00	2016-09-29 11:26:34	1864		2	2		2	1	Y	1	1	1	NO	5	3	1
School	1	MILJÖTINGET 2016 11-13 NOVEMBER I MALUNG ANMÄL DIG PÅ miljotinget.se ISON OCH FILLE BEATRICE RINDEVALL/SUPERMILJÖBLOGGEN JOHANNA STÅL/CAMINO MAGASIN AGENDA 2030– DELEGATIONEN STAND UP MED CARL STANLEY & GASTA-COMEDY KLUBB MILJÖTINGET WORKSHOP GALAMIDDAG	2016-09-29 11:07:22	1872		1	20	1	1	1	Y	3	2	1	YES	2	1	2
School	1	www.facebook.com/bokzirkel Boktips, anekdoter & annat	2016-09-29 11:10:22	1872		1	15		2	1	Y	3	2	1	YES	7	1	2
School	1	Café Viljan och vår butik har öppet Tisdagar kl. 9.30-11.00 Torsdagar kl 9.30-11.00 Vi tar bara kontanter Kanelbullens dag den 4 oktober Välkomna!	2016-09-29 11:10:37	1872		1	3	2	2	1	Y	2	5	1	NO	5	1	2
School	1	• Kultur Föreläsning Fridolinsalen, Avesta bibliotek Tisdag 4/10 kl. 18.30 Våga kämpa, mot alla odds Inspirationsföreläsning av Dalaälvsimmaren NN, äventyrare och entreprenör. Gratisbiljetter finns att hämta i Avestas biblioteks servicedisk Arrangörer: Avesta bibliotek I samarbete med NBV NBV Avesta kommun	2016-09-29 11:16:40	1872		1	12	1	1	1	Y	3	2	1	NO	4	1	2
School	1	Fulla människor gör dåliga val VAD VÄLJER DU? unf UNGDOMENS NYKTERHETSFÖRBUND www.unf.se	2016-09-29 11:20:04	1872		1	24	1	1	1	Y	3	1	1	YES	2	3	1
School	1	#133 Fortsätt hjälpa den som är ny på skolan /arbetsplatsen att komma in i vardagen hela första terminen inte bara första dagen. RAOUL WALLENBERG ACADEMY	2016-09-29 12:03:29	1864		1	24	1	1	1	Y	3	1	1	NO	5		2
Supermarket	1	Svenska kyrkan STENUNGSUND Norums vokalensemble framfr musik av LALEH under ledning av NN NN – piano NN – trummor NN – bas NN, präst MUSIK AV LALEH I KAPELLET MUSIKGUDSTJÄNST LÖRDAG 1 OKTOBER KL. 18.00 I STENUNGSUNDS KAPELL Fri entré En del av kulturarrangemanget Tio små hus och ett kapell	2016-09-29 11:11:12	1891		1	17	1	1	1	Y	3	2	1	NO	4	2	2
Supermarket	1	Till salu!!! Ida Katt.. Bornö 23. Båten är byggd 1980, ombyggd till nuvarande utseende med doghouse 2011. Motor. MD11C sötvattenskyld. Ekolod och VHF radio. Hydraulstyrning. Längd 7,0 m Bredd 2,50 m. Ring för information och pris. Telefon ### NN	2016-09-29 11:13:03	1891		1	2	7	1	1	Y	2	2	1	NO	1	4	2
Supermarket	1	MC Yamaha Dragster 650 Grå metallic -04. Gått 1955 mil. Mycket välvårdad. Besiktad u.a april - 16. Nästa besiktning -18 35.000 el. högstbjudande. Tel. ### ###	2016-09-29 11:15:25	1891		1	2	7	1	1	Y	1	2	1	NO	1		2
Supermarket	1	Konsert för Världens Barn Radiohjälpen 90 1950-6 8 okt kl. 16.30 i Fregattens stora sal Våra små Rosetter fr Ucklum under ledn. av NN NN fr Stenungsund, komp av NN NN solist från Ucklum NN solist från Spekeröd Samordnare: Röda korset – Rädda barnen – Lions – Svenska kyrkan Entré vuxna 100 kr Barn under 15 år frivillig entré Biljetterna säljs vid entrén Alla intäkter går till Världens Barn	2016-09-29 11:17:43	1891		1	20	1	1	1	Y	3	2	1	YES	4		2
Supermarket	1	VI SÖKER FOTOGRAFER Få en kickstart i din karriär!	2016-09-29 11:32:35	1891		1	24		1	1	Y	3	2	1	NO	6	1	2
Supermarket	1	HARRYS-18 Hawaii Party Lördag 1 OKTOBER KL 22.00-02.00 | 18 ÅR DJ CHRIS KILROY Harrys - I GOTT SÄLLSKAP	2016-09-29 11:36:49	1891		1	20	2	2	1	Y	3	1	1	YES	2	1	2
Supermarket	1	FRITIDSGÅRD MÅN 17-20 BARA FÖR SJUOR TISD 17-21 TORSD 17-21 FRE 18-23 HT 2016 Hasselgården PROJECT MONDAY MÅN 17-20 BOKA INNAN UNGDOMSCAFÉET ONS 17.30-20.30 FRITIDSWEBBEN.se Ungdomsverksamheten Kultur och fritid TEL: ### INSTA: hassel_swag Stenungsunds kommun	2016-09-29 11:43:14	1891		1	20	1	2	1	Y	3	1	1	YES	6		2
Supermarket	2	ADDA MATTE Hur laddar du inför höstens högskolestudier? Matematik är ett avgörande ämne på många utbildningar och du kan förbereda dig smart genom att läsa sommarmatte på nätet. På sommarmatte.se kan du plugga tillsammans med tusentals andra studenter och ta hjälp av våra mentorer. Kurserna är nätbaserade och du väljer själv start och tempo. De är avgiftsfria, ger högskolepoäng och rätt till stud…	2016-09-29 11:48:32	1891		1	12	8	1	1	Y	3	1	1	YES	6	1	2
School	1	KONSTELLATION After School Programe for Art & Design at ISGR Exhibition Making Calligraphy Drawing Bookbinding Photography Pattern Making Led by artist NN and designer NN with specialist workshop by guest artists from Akademin Valand. Following the success of Art Club last year, we are delighted to announce a new series of workshops open to all students grade 5-10! The programme will be held in t…	2016-09-29 11:11:23	1901	3	1	12	1	2	3	Y	3		1	YES	6	4	2
Public Place	1	leparse.com smycken online LE PARSE leparse leparses	2016-09-29 11:12:38	1872		2	2	2	2	1	Y	2	1	1	YES	6	3	2
Public Place	1	GÅRDSLOPPIS I RUTBO %%% och %%% Lördagen den 24 september Kl. 10-14 Massor av prylar, julsaker ,mattor, leksaker, TV-bänk, säng med lådor mm. Även lingon. Inställt vid ihållande regn.	2016-09-29 11:20:26	1872		2	2	7	2	1	Y	2	1	1	NO	4	1	1
Public Place	1	ÅTERBRUKET Second Handbutik i Karlbo LOPPIS Besök oss på Björkstigen 1 i Karlbo Telefon ### Öppettider: Tisdag-Lördag 10:00 - 18:00 Söndagar och Måndagar stängt	2016-09-29 11:23:20	1872		2	2	2	1	1	Y	2	1	1	NO	6		2
Public Place	3	Jularbo-dagen 2016 EN KONSERTDAG MED HUVUDVIKT PÅ CALLES OCH EBBES MUSIK ÅRETS MEDVERKANDE: PETER HARRYSON Från ”Så ska det låta” och ”Rederiet” Gitarrist BENGT MAGNUSSON NILS FLÄCKE LEIF GÖRAS MED VÄNNER ANDERS LARSSON LINDA KARLSSON STOCKHOLM ACCORDION CLUB Programledare: Lena Jularbo_Brauner och Håkan Pettersson AVESTA TEATER Frejgatan 1, 774 41 Avesta Lördagen den 5 november 2016 kl. 13.00 Bi…	2016-09-29 11:37:05	1872		2	20	1	1	1	Y	3	2	1	NO	6	3	2
Public Place	2	Picknick på slagfältet av Fernando Arrabal Regi: Thomas Herrgård Medverkande: NN NN NN NN NN NN PREMIÄR 24/9 19.00 Övriga speldagar 25/9 15.00, 28/9 19.00 1/10 15.00 och 19.00 2/10 15.00 BILJETTER: ### BERGSLAGS- Teatern www.bergslagsteatern.se	2016-09-29 11:41:32	1872		2	20	1	2	1	Y	3	2	1	YES	6	3	2
Public Place	2	• Kultur Föreläsning Fridolinsalen, Avesta bibliotek Tisdag 4/10 kl. 18.30 Våga kämpa, mot alla odds Inspirationsföreläsning av Dalaälvsimmaren NN, äventyrare och entreprenör. Gratisbiljetter finns att hämta i Avestas biblioteks servicedisk Arrangörer: Avesta bibliotek I samarbete med NBV NBV Avesta kommun	2016-09-29 11:45:32	1872		2	12	1	1	1	Y	3	2	1	NO	4	2	2
Public Place	2	HEDEMORA BLUES JAM OPEN STAGE Perfect Blue Sky JANE KITTO, AUSTRALIA/PNA ANDERSSON, SWEDEN Husband: Annas blueskok NN NN NN NN 1 okt från kl 14 Kom med ditt instrument/och eller din röst. Backline och husband finns. OBS! Jammare - kom i god tid! Alla under 18 år i målsmans sällskap. Facebook: Hedemora Blues Jam Fri entré med bidrag till mjölkkrukan välkomnas Swish ### @Kings Arms • Hedemora • ###	2016-09-29 11:19:40	1872		2	20	1	2	1	Y	3	2	2	NO	6	3	2
Public Place	1	Bergslags Teatern SESSAN prinsessbakelse Monolog och diskussion om kvinnlig alkoholism EXTRA KOMMUNALRÅDET TAR TIME-OUT Kris i kommunledningen efter fylleskandal NN skådespelare NN producent, samralsledare NN regissör NN manusförfattare IOGT-NTO Nyhyttan AVESTA den 13 oktober kl 19:00 Biljettbokning ### Biljettpris 150:- Fika ingår	2016-09-29 11:21:21	1872		2	20	1	2	1	Y	3	2	1	NO	6	3	2
Public Place	1	www.funbun.se Funbun är en webbshop för kannintillbehör. Här erbjuds unika och roliga produkter till bra priser. Välkommen in i webbutiken! På vår hemsida hittar du det allra bästa till kaninen. VECKANS VARA TILL EXTRAPRIS	2016-09-29 11:25:14	1872		2	2	2	2	1	Y	2	2	1	YES	2	1	2
Supermarket	1	Modevisning Församlingshemmet Björna 6/10 19:00 Fika Bazaar | Backyard Naturkompaniet | Edblads Johannas gammalt och nytt Underhållning Biljetter säljs på Coop Nära i Björna Vuxen 120 kr | BArn 6-16 60 kr Vinstchans på biljetten RödaKorset Björna RödaKorskrets Betala med SWISH till ### Mode	2016-09-29 11:31:15	1855		1	20	1	2	1	Y	4	3	1	NO	4	1	2
Supermarket	1	BIF ÖPPETTIDER FÖR BJÖRNA IF:S KANSLI: Måndag – Fredag Kl. 08.00 – 12.00 Adress: Husumvägen 19 Telefon: ### (kansli) ### (vaktmästare)	2016-09-29 11:31:57	1855		1	24	1	1	1	Y	2	1	1	NO	1	1	2
Supermarket	1	SAKNAD KATT ! Har någon sett min grå/vita långhåriga katt Pepsi? Han är en kastrerad hankatt på 1½ år, försvann för 2 veck. sedan. Ring min mamma eller pappa. MVH Oskar NN: ### NN: ### HEM ###	2016-09-29 11:32:30	1855		1	9	7	1	1	Y	1	1	1	NO	1	1	1
Supermarket	1	Hopp och Lek! Nu kör vi igång Barngympan igen. STationsövningar på lagom nivå för barn ellan 3-5 år. Vi ser gärna att åtminstone en förälder finns på plats under tiden. Plats: Björna gymnastiksal Tid: 18.15-19.00 När: Tisdagar, med start 4/10 t.o.m. 22/11 2016 Pris: 200kr/barn Betalning sker kontant eller via swish Swish-nummer: ### Ange: Barngympa + namn Vid frågor eller funderingar ring: NN ###…	2016-09-29 11:33:44	1855		1	3	1	2	1	Y	2	1	1	NO	1	1	1
Supermarket	1	MEDmänniska! Känner DU för att göra något för våra asylsökande men vet inte vad? Kan DU tänka dig att hjälpa till vid olika sammankomster? Kan DU tänka dig att vara MEDmänniska? Slå en pling så funderar vi tillsammans! Vid funderingar/frågor kontakta: NN ### NN ### Asylnätverksgruppen "Medmänniskor i Björna" Svenska kyrkan BJÖRNA FÖRSAMLING	2016-09-29 11:34:36	1855		1	24	1	1	1	Y	3	3	1	NO	1	1	2
Supermarket	1	BILBARNSTOL ÖNSKAS KÖPA SNARAST! TILL EN 2ÅRING SOM VÄGER 13 KG JAG HÄMTAR DEN GÄRNA! TA KONTAKT MED NN ### eller ###	2016-09-29 11:35:12	1855		1	2	7	1	1	Y	1	1	1	NO	1	1	1
Supermarket	1	Utförsäljning av alla bibliokeks musik-CD Kom och fynda hundratals titlar Endast 10 kronor styck eller 7 stycken för 50 kronor Utförsäljningen startar torsdagen den 22/9 kl 10.00 Välkomna till Björna bibliotek!	2016-09-29 11:36:00	1855		1	2	1	1	1	Y	2	2	1	NO	4	1	2
Supermarket	3	FINSKA DRAGSPELSLEGENDEN VEIKKO AHVENAINEN CARINA NORDLUND GIDEÅGÅRDEN Torsdagen 6/10 kl. 19.00 KOM OCH LYSSNA TILL DRAGSPELS-KLASSIKER, POPULÄRA TANGO, VALSER, POLKA M.M VÄLKOMMEN TILL HÖSTENS DRAGSPELSKONSERT! Biljetter 100:-	2016-09-29 11:36:52	1855		1	20	1	2	1	Y	3	2	1	NO	4	1	2
Supermarket	1	ÖPPEN SKAPARVERKSTAD Startar den 19 September Är du intresserad av att arbeta med färg och form ? Tycker du om att måla och vara kreativ ? Då kan du vara med på KULTURSKOLANS KURS I BILD. Vi kan träffas på Måndagar kl. 17-19 i bildsalen, björna skola. kursen är öppen för alla -barn,föräldrar ung som gammal,nyinflyttad osv. Vi arbetar med nya material och ideer för varje gång. Start: 19 september …	2016-09-29 11:37:28	1855		1	20	1	2	1	Y	4	1	1	NO	6	1	1
Supermarket	1	PRO PENSIONÄRERNA I Björna-Gideå TRÄFFAS tis DAGEN DEN 11/10 KL. 13 LOKAL Svedjestugan PROGRAM Information Bingo Skrivtolkar Pris 100 kr Kaffe/te, smörgåstårta+1 bingobricka Bindande anmälan senast 6/10 till NN ### VÄLKOMNA! PRO Björna-Gideå	2016-09-29 11:38:11	1855		1	20	1	1	1	Y	4	1	1	NO	6	1	2
Supermarket	1	SITTGYMPA Träffpunkten Björnaborg Välkommen! Tisdagen den 6/9 kl 10.30 startar sittgympa från DVD på Träffpunkten Björnaborg. Kom och kolla om det är något för dej. Det kostar ingenting. Blir vi ett "gäng" kan vi fika före eller efter gympan . Det beror på vad ni vill. Planerade datum hösten 2016: 6/9 13/9 27/9 4/10 10/10 18/10 25/10 1/11 8/11 15/11 29/11 6/12 Det kan bli ändringar på datumen, me…	2016-09-29 11:39:24	1855		1	20	1	2	1	N	2	1	1	NO	6	1	1
Supermarket	1	SENIORSHOP KLÄDER FÖR KVINNOR OCH MÄN SENIOR SHOP KLÄDFÖRSÖLJNING SPF Fyrklövern Folkets Hus Långviksmon Lördag 1/10 kl.13.00 Modevisning med försäljning Välkomna! SVERIGES SENIOR SHOP	2016-09-29 11:40:06	1855		1	2	2	2	1	Y	3	2	1	YES	6	1	2
Supermarket	1	Underhållning kvartal 3 2016 Träffpunkten Björnaborg Välkommen! Klockan 13.00 på tisdagar börjar "Kaffesurr" för de som bor utanför Björnaborg. Underhållningen börjar kl 14.00 och kostar 20 Kronor. En Bingobricka kostar 10 kr Tisdag 5 juli Kören Sångglädje–Fika av Hembygdsföreningen Tisdag 12 juli NN Fika Onsdag 13 juli Efter lunch Djurens dag Tisdag 2 aug Kören Ny Glädje Fika av PRO. Onsdag 17 a…	2016-09-29 11:41:31	1855		1	20	1	2	1	Y	2	1	1	NO	6	1	1
Supermarket	1	Vattengymnastik Björna badhus Onsdagar klockan 19.00 Vi börjar vecka 38 onsdagen den 21 september Vid frågor ring NN ### Välkommen BGF	2016-09-29 11:42:29	1855		1	20	1	1	1	N	2	3	1	NO	6	1	2
Other	1	Gävles Motormässa GTK hallen 1-2/10 Öppet 10-16 Utställning- Försäljning Underhållning m.m. Entré 100:- Barn under 16 gratis I målsmans sällskap. Meguiar's	2016-09-29 11:32:59	1872	1	2	20	2	2	1	Y	3	2	1	NO	4	3	2
Private Place	1	Momenta DIPLOM Trafiksäkerhet för Sveriges barn Ett stort tack till SKANSKA SVERIGE AB För Ert deltagande i samband med trafiksäkerhetskampanjen i Er kommun, tilldelas ni härmed detta Diplom. Trafik- kampanj 2016 omg 2 Deltagare	2016-09-29 11:35:05	1944		1	24	8	2	1	Y	3	1	1	NO	6	4	2
Private Place	1	SKANSKA Väg och Anläggning Norr/Mark Västerbotten PRODUKTIONSCHEFERNA ÄR ENIGA DET HÄR ÄR VIKTIGAST FRÅN AFFÄRSPLANEN 2016 INTÄKTSFOKUS ÖKAD MOBILITET TJÄNA 454 KR/DAG Vision & Mission 2018 Vision: Vi bygger ett hållbart Västerbotten och leder förändringen¹ av branschen Mission: Vi prioriterar rätt projekt ¹En roligare och mer sund bransch Ekonomiska mål 2016 Mål Utfall 2015 Nettoomsättning 150 M…	2016-09-29 11:38:23	1944		1	24	2	1	1	Y	3	2	1	NO	5	4	2
Public Place	2	DALA PRIDE 2016 EN INTERSEKTIONELL NORMKRITISK FESTIVAL 19–24 september – i hela Dalarna Med stor festivalavslutning i Falun lördag 24 september: prideparad 12.00 i Kvarnparken / Falupride på Kulturhus tio14 13.00-21.00. HBTQ INTRO / BLATTEQUEERS / DANS / FLERSAMHET / FEMINISKTISKT SJÄLVFÖRSVAR / NN / ASEXUALITET / FUNKIS / QUEERING SAPMI / FILMVISNING / SPELKULTUR / WORKSHOPS / PRO-BINGO / MED M…	2016-09-29 11:40:55	1872		2	24	1	2	1	Y	3	2	1	YES	2	3	2
Other	2	www.avesta.se Avesta satsar på Outdoor! Vi vill därför få reda på dina tips på bra aktiviteter i vår kommun och önskemål på vad som saknas eller kan bli bättre för att kunna fortsätta att utveckla Avesta outdoor. Under #avestaoutdoor tipsar vi varandra via sociala medier om sköna outdoorställen och aktiviteter. På www.avesta.se/outdoorkartan ka du lämna önskemål på nya aktiviteter och pricka ut d…	2016-09-29 11:40:59	1872	4	2	24	4	2	1	Y	3	2	1	YES	2	3	2
Library	1	MODEVISNING 29 september 2016 Kulturhuset Fregatten i Stenungsund kl . 18.30 Biljetter köps på Stenungsunds Turistbyrå Kulturhuset Fregatten tel: ### Björk by Viksten & Marmander Jade Player Fashion emmy design Hogengård KjolTyget Alina design Katarina Henriksson Flora manufaktur olars ulla	2016-09-29 11:41:46	1891		1	20	1	2	1	Y	3	2	1	NO	6	1	2
Library	1	Biblioteket bjuder in till digital delaktighet Tisdagen den 4 oktober klockan 10-12 Ta del av de e-tjänster som erbjuds på biblioteket Tisdagen den 4 oktober visar och berättar biblioteket om: Library Press Display. Läs tidningen i dator eller på surfplatta. E-böcker och strömmande ljudböcker - så funkar det. Talböcker, Legimus och daisyspelare – för dig som har en läsnedsättning. Du kan göra Wik…	2016-09-29 11:59:43	1891		1	12	1	1	1	Y	3	2	1			1	2
Library	1	BOKKLUBB FÖR BOKSLUKARE Älskar du att läsa och är mellan 10-12 år? Då tycker vi att du ska vara med i våran bokklubb för bokslukare! Kom hit och pyssla, quiza, fika, diskutera och träffa nya och gamla kompisar. Var: Stenungsunds bibliotek När: 5/10, 2/11, 30/11, 4/1 Tid: 15.30-17.00 Till varje tillfälle har vi ett tema. Fundera därför gärna på vilka böcker du vill tipsa om inom detta tema. TEMA 5…	2016-09-29 12:00:39	1891		1	15	1	2	1	Y	3	2	1			1	2
Library	1	KONRADS KALAS Tänk att fylla år! Konrad älskar kalas. Rosetter, krusiduller och marsipanrosen förstås! Hoppas bara att någon kommer.... Tamdidam, tamdidam... Det är ju smarta Siv. Som kan räkna till fyra, och äter banan med skal så man slipper skala! Smart va? Följ med på kalas och träffa Konrad och hans vänner: Kusin Blomma, Rutig & Randig, Lilla Mu och Smarta Siv. Det blir ett härligt dockävent…	2016-09-29 12:01:23	1891		1	20	1	2	1	Y	3	2	1			1	2
Library	1	Inlands släktforskare har öppet hus på Stenungsunds bibliotek lördag 24 september och 26 november 2016 kl 11-14 VÄLKOMMEN! www.insf.se	2016-09-29 12:02:08	1891		1	20	1	1	1	Y	2	2	1	YES	6	1	2
Library	1	Brodericafé Har du lust att börja brodera eller är du redan en inbiten brodös? Alla är välkomna! NN som erhöll Broderiakademins silvernål 2015 berättar om sina broderade brev. Fri entré! tisdag 18 oktober kl 18.00 info ### www.stenungsund.se STENUNGSUNDS BIBLIOTEK	2016-09-29 12:03:49	1891		1	20	1	2	1	Y	3	2	1	YES	6	1	2
Library	1	Fria fötter barnteater och workshop Strax söder om evigheten i centrum av landet möjligheten ligger lander Apolonien. Där växer tonerna på träd och uppe i lövverken viskar sånger som öppnar människornas hjärtan. Där bor karaktärerna Mustaschen, Brillan, Kaj och Rogen som ägnar hela dagarna åt att skapa och spela världsmusik. Men det har inte alltid varit så, detta är berättelsen om vad som jagade…	2016-09-29 12:05:18	1891		1	20	1	2	1	Y	3	2	1	YES	6	1	2
Library	1	Föreslå Kulturstipendiat! Stenungsunds kommuns Kulturstipendium, som är på 20 000 kronor, utdelas till person eller förening för värdefulla insatser inom det kulturella området i Stenungsunds kommun. Förslaget lämnas senast 30 september 2016 till Kulturkontoret, Kulturhuset Fregatten, Fregatten 2, 444 30 Stenungsund eller per e-post: @@@ Blankett finns på biblioteket eller www.stenungsund.se/kult…	2016-09-29 12:38:25	1891		1	24	4	1	1	Y	3	1	1	YES	6	1	2
Library	1	Sångstund för de minsta De allra minsta barnen (0-3 år) och föräldrar är välkomna till en sångstund tillsammans med Fredrik från Kulturskolan. Antalet platser är begränsat, gratisbiljetter hämtas i biblioteket en månad före arrangemanget. tisdag 6 september kl 11 tisdag 4 oktober kl 11 tisdag 1 november kl 11 tisdag 6 december kl 11 Stenungsunds bibliotek ### @@@	2016-09-29 12:40:05	1891		1	20	1	2	1	Y	3	1	1	NO	6	1	2
Library	1	Välkomna till HÖSTKONSERT "Gott och blandat" med SPF-kören SÅNGARGLÄDJE och konsertpianisten NN Körledare: NN Arr: SPF och Studieförbundet Vuxenskolan Lördag 1 oktober kl 16.00 Kulturhuset Fregatten. Entré: 80 kr, biljetter vid entrén	2016-09-29 12:43:41	1891		1	20	1	2	1	Y	3	2	1	NO	4	1	2
Library	1	Informationsmöte för blivande pensionärer Funderar du på att gå i pension? Pensionsmyndigheten erbjuder ett tillfälle till information om den allmänna pensionen och vad du ska tänka på inför din ansökan. 31 okt. kl. 17.30 - 19.00 Fregatten, Stenungsund Anmäl dig på www.pensionsmyndigheten.se/informationsmote eller ring ### Välkommen!	2016-09-29 12:47:24	1891		1	20	3	1	1	Y	3	1	1	YES	6	1	2
Library	1	Författarmöte med Carin Hjulström HJULSTRÖM Carin Hjulström är journalist, manusförfattare och programledare, har bland annat lett Melodifestivalen, Carin med C, TVHuset och Carin 21:30, och skriver regelbundet i ett flertal tidningar. 2009 debuterade hon med "Finns inte på kartan". Nu aktuell med "Kärlek sökes", en rolig och varm feelgoodroman om radiojournalisten Frida som börjar nätdejta.	2016-09-29 12:49:25	1891		1	20		1	1	Y	3	2	1			1	2
Library	2	Konsert för Världens Barn Radiohjälpen 90 1950-6 8 okt kl. 16.30 i Fregattens stora sal Våra små Rosetter fr Ucklum under ledn. av NN NN fr Stenungsund, komp av NN NN solist från Ucklum NN solist från Spekeröd Samordnare: Röda korset – Rädda barnen – Lions – Svenska kyrkan Entré vuxna 100 kr Barn under 15 år frivillig entré Biljetterna säljs vid entrén Alla intäkter går till Världens Barn	2016-09-29 12:53:20	1891		1	20	1	2	1	Y	3	2	1	YES	4	1	2
Library	1	FÖRELÄSNING: NN ÅRETS HUNDFÖRELÄSNING! Föreläsningen vänder sig i första hand till hundägare som har hunden som sällskap. Du får goda råd när det gäller lydnadsmoment som inkallning och platsliggning. Du får även tips på hur du och din hund kan utvecklas och ha roligt tillsammans. måndag | 18.30 | 3/10 | 150:- Fregatten, Stenungsund www.medborgarskolan.se medborgarskolan	2016-09-29 12:54:23	1891		1	12	1	2	1	Y	3	2	1	YES	6	1	2
Library	1	Träffa hörselhjälpare på Stenungsunds bibliotek kl 10.00-12.00 Måndag 12 september 10 oktober 7 november 5 december Du kan få svar på frågor om hjälpmedel och hjälp med enklare problem med din hörapparat. Info ### STENUNGSUNDS BIBLIOTEK	2016-09-29 12:55:24	1891		1	19	1	1	1	Y	3	2	1	NO	6	1	2
Library	1	Språkcafé SPRÅKCAFÉ FÖR KVINNOR Kom och var med på språkcaféet i Stenungsunds bibliotek. På språkcaféet får du tillsammans med andra öva din svenska i en glad och trevlig miljö. FREDAGAR 10.00 – 12.00. Fri entré. Stenungsunds bibliotek ### | @@@	2016-09-29 12:56:23	1891		1	20	1	1	1	Y	3	2	1	NO	6	1	2
Library	1	Stickcafé Välkommen till en avkopplande och inspirerande kväll tillsammans med likasinnade! Medtag egen fika. NN tipsar. Ta gärna med något stickat eller virkat om du vill visa och ge oss andra nya idéer. Du kanske har något bra sticktips att förmedla? kl 18 - 21 onsdag 5/10 (Bohuslänsrummet, biblioteket) onsdag 2/11 (Mariagården) Fri entré! arr Kulturkontoret, Stenungsund info ###	2016-09-29 12:57:26	1891		1	20	1	2	1	Y	3	2	1	NO	6	1	2
Other	1	Larz Kristerz RÄTT Å SLÄTT SKIVSLÄPP torsdag 29/9 kl 18.00 på Porfyr- och Hagströmsmuseet i Älvdalen. Dragning i gitarrlotten. Två nya Hagströmsgitarrer lottas ut.	2016-09-29 11:43:19	1880	1	2	20	2	2	1	Y	3	2	1	NO	4	3	2
Public Place	1	Avesta Poetry & Peace 2016 1-3 september Verket/Avesta art & Karlfeldtsgården i Karlbo Martin Schibbye • Pa Modou Badije • Lars Hjertner Vilma Flood Hases • Shafiqa Yarqin • Axin Velat • Molly Andersson • Hejar Shixo • Hassan Abo Alshamlat • m.fl POETRY SLAM, MUSIK, KONST, POESI och DET FRIA ORDET Fri entré på Verket/Avesta Art under festivalens programspunkter! För mer information: http://www.ve…	2016-09-29 11:48:39	1872		2	20	1	2	1	Y	3	2	1	YES	6	3	2
Supermarket	1	LOPPIS Spekeröds Bygdegård Lördag den 24/9 Kl 1100-1400 Kom och fynda hos våra säljare. Försäljning av nybakat tunnbröd och annat hembakat. Café med hembakat och tunnbrödssmörgås. Välkomna! Styrelsen LOPPIS	2016-09-29 12:00:42	1934		1	2	1	2	1	Y	3	3	1	NO	4	1	2
Supermarket	1	HJÄLP MED BÅT/HUS/TRÄDGÅRD Händig man som jobbat med båtar utomlands, Söker båtar att fixa upp inför säsongen. Noggrant och ordentligt jobb utföres såsom rengöring, vaxning, polish, och målning. Även byggnationer, målning el trädgårds jobb. Ring ###, ### Curtis	2016-09-29 12:06:05	1934		1	3	7	1	1	Y	2	1	1	NO	1	1	1
School	1	#1 Våga säg ifrån nästa gång du hör någon använda uttryck som du tycker är rasistiska, sexistiska eller homofoba. RAOUL WALLENBERG ACADEMY	2016-09-29 12:06:50	1864	4	1	24	1	1	1	Y	3	1	1	NO	5	1	2
Supermarket	1	Faster Bertas stuga! Konst & Hantverk Vid väg 160 strax norr om Jörlanda. Silversmide, smycken, akvarell, textil, trä, hembyggslitteratur, musik-cd m m av lokala hantverkare. Ny konstverksutställning varje månad! Öppet: torsdagar 15–18, fredagar 15–18, lördagar 10–15 Tfn: ### Gilla oss på Facebook! Välkomna!	2016-09-29 12:09:58	1934		1	2	2	2	1	Y	2	5	1	NO	6	3	2
Supermarket	1	Strålkastarpolering Vi polerar upp dina matta och repiga strålkastare till fint skick. Strålkastarna blir med tiden oftast matta och försämrar ljuset på vägen. Så istället för att köpa nya när sikten blir dålig eller bilprovning underkänt dom, så är allternativet att slipa och polera upp dom på ett mycket billigare sätt. Priset för 2st är 750:- Före Efter Isakssons solfilmsmontering NN ### Solber…	2016-09-29 12:13:53	1934		1	3	2	1	1	Y	2	2	1	NO	1	1	2
Supermarket	1	Tred gård make riet NN Trädgårdsanläggare @@@ Telefon: ### Stenungsund Rådgivning – vid ett hembesök får du tips och idéer om hur du ska vårda och få din trädgård att frodas. Planering – skissar hela eller delar av din trädgård eller kanske bara en rabatt eller två. Beskärning – träd, buskar & häckar Plantering – Träd , buskar , häckar, perenner , gräsmattor & krukor Skösel & Underhåll – rensning…	2016-09-29 12:17:14	1934		1	3	2	1	1	Y	2	1	1	NO	6	1	2
Supermarket	1	Lökar, lökar massor av lökar Lördagen den 15 oktober Klockan 11.00 - ca 13.30 Häggvallskolan NN från Elises Blomsterlökar, Årjäng håller föredrag om vårlökar. Hon berättar om och visar bilder på blomsterlökar och lär oss hur vi på bästa sätt planterar och tar hand om vårlökarna i trädgården. Vi får även veta mer om botaniska tulpaner, narcisser, snödroppar, tidlösa och mycket, mycket mer. NN duka…	2016-09-29 12:18:41	1934		1	12	1	1	1	Y	2	3	1	YES	6	1	2
School	2	Om du drömmer om att spela fotboll, ta en fika efter skolan eller att slippa bli bortgift.... ...så kan det vara så att din familj och släkt hindrar dig från att leva det liv du har rätt till. Din familj har rätt att bry sig om dig – men inte att kontrollera, kränka eller hota dig, eller tvinga dig till saker du inte vill. I Sverige finns tydliga lagar för att skydda barn och ungdomar – alla barn…	2016-09-29 12:28:51	1864	4	1	24	3	1	1	Y	3	1	1	YES	6	1	2
School	1	Kränkt.se Har du blivit oschysst behandlad på nätet? Har du blivit oschysst behandlad på nätet? Är det någon som har skrivit något nedsättande om dig på ett forum eller kanske lagt upp en bild på dig som du inte vill att andra ska se? Kränkt.se ären webbplats som är till för dig som känner att du blivit oschysst behandlad på Internet. Här får du råd om vad du kan göra för att lösa problemet. Det …	2016-09-29 12:31:18	1864	4	1	24		1	1	Y	3	2	1	YES	2	1	2
School	1	DET FRIA ORDET FRÅN KARLFELDT TILL DAWIT ISAAK Avesta Poetry & Peace 31 aug - 3 sept 2016 Strax efter skolstarten kommer poesin och yttrandefriheten att stå i fokus i Avesta. Då arrangeras nämligen Avesta Poetry & Peace. Det blir ett brett programutbud för både unga och gamla, som Karlfeldtföreningen, Södra Dalarnas FN-förbund och Avesta Art arrangerar från 31 augusti - 4 september. Med följande …	2016-09-29 12:33:31	1864	4	1	20	1	2	1	Y	3	2	1	NO	6	1	1
School	1	ELEVHÄLSAN Tips från skolkuratorerna Om du vill prata med någon om hur du har det, hur du mår eller få mer information. På Karlfeldtsgymnasiet Skolkurator NN ### NN ### I Avesta kommun Ungdomsmottagningen i Avesta Kommun Telefon:### www.umo.se På nätet kan du ställa frågor anonymt om du vill. Höjden- socialtjänstens öppenvårdsmottagning för ungdomar Telefon: ###, ### Socialtjänsten i Avesta Kommu…	2016-09-29 12:36:12	1864	4	1	24	8	1	1	Y	3	1	1	YES	6	1	2
School	1	BOKKLUBB för BOKSLUKARE Älskar du att läsa och är mellan 10-12 år? Då tycker vi att du ska vara med i våran bokklubb för bokslukare! Kom hit och pyssla, quiza, fika, diskutera och träffa nya och gamla kompisar. Var: Stenungsunds bibliotek När: 5/10, 2/11, 30/11, 4/1 Tid: 15:30-17:00 Vid varje tillfälle har vi ett tema. Fundera därför gärna på vilka böcker du vill tipsa om inom detta tema. TEMA 5/…	2016-09-29 12:21:47	1934	1	1	15	1	2	1	Y	3	2	1	NO	6	1	1
Supermarket	1	Sann Utveckling i väst Hållbar förändring inom stresshantering och karriär Har du svårt att få balans mellan arbete och fritid? Känner du att du vill arbeta med något annat, men vet inte vad? Har du problemet stress? Har du andra utmaningar relaterade till stress eller karriär? Genom tydliga mål, effektiva handlingsplaner och genom att utgå från dina styrkor och drivkrafter finns goda möjligheter…	2016-09-29 12:23:57	1934		1	3	2	1	1	Y	2	2	1	YES	6	1	2
Public Place	3	• Kultur Föreläsning Fridolinsalen, Avesta bibliotek Tisdag 4/10 kl.18.30 Våga kämpa, mot alla odds Inspirationsföreläsning av Dalälvssimaren NN, äventyrare och entreprenör. Gratisbiljetter finns att hämta i Avesta biblioteks servicedisk	2016-09-29 12:42:40	1864		2	12	1	1	1	Y	3	2	1	NO	4	1	2
Public Place	1	Välkommen till PEN´S SECOND HAND Avestas nya köp och säljmarknad Hit kan du lämna det mesta till försäljning Vi har 400 kvm med prylar. Ni hittar oss på Skogsbovägen 9 Tel ### NN eller NN Mer info på som uppdateras varje vecka Julklappstips : Presentkort på Pen's second hand	2016-09-29 12:43:49	1864		2	2	2	1	1	Y	2	2	1		6	3
Public Place	1	Lost Army Presenterar: KRISTALLENTURNÉN 2016 LALEH Under hösten kommer Laleh tillsammans med en sinfonietta och popband göra en exklusiv omfattande turné med över 30 musiker på scen där de spelar klassiska Laleh-låtar i helt unika versioner. Tillsammans med Modern Fantazias, under ledning av dirigenten och arrangören NN, kommer de att bjuda på en unik genreöverskridande arenakonsert. 29/10 Väster…	2016-09-29 12:46:26	1864		2	20	1	2	1	Y	3	2	1	YES	6	3	2
Public Place	1	Efterlysning Honda XR 125. Stulen 16/8. Ring ###-NN	2016-09-29 12:46:56	1864		2	10	7	1	1	Y	2	2	1	NO	1	2	2
Public Place	1	SVERIGES MEST STENKLARA ANDELSSPEL ÄR BARA ETT KLICK BORT! På Köpandel.se Kan du hitta Hulkens stenklara klara andelsspel till varje V75-omgång! Andelar från 100 till 2.000 kr. KÖPANDEL.SE HULKEN STENKLART GÅ MED I HULKENS TRAVKRUPP PÅ FACEBOOK!	2016-09-29 12:47:38	1864		2	3	2	1	1	Y	3	1	1	YES	6	4	2
Public Place	1	I sommar spelar vi Det påtvingade äktenskapet text av Peter Böök, fritt efter Jean Baptiste Molière 7 roller 2 skådespelare 45 minuter NN NN 20 JULI 19:00 BERGSLAGSEATERN Pris 100:- / 50:- (cash only)	2016-09-29 12:51:51	1864		2	20	1	2	1	Y	4	5	1	YES	6	3	2
Public Place	1	LIVETS MENING Utan gud och utan hopp är livet meningslöst. Arbete och jäkt ger inte verklig tillfredsställelse. ÄR DU LYCKLIG? Många unga och gamla kan vittna om att bara ett liv i tro på JESUS ger verklig lycka. JESUS GÖR LIVET MENINGSFULLT! FRÄLST eller FÖRLORAD Du lever bara en enda gång och är på vandring mot himlen eller helvete. Så säger Guds sanna ord. Jesus dog och uppstod för dig. Genom …	2016-09-29 12:54:45	1864		2	24		1	1	Y	2	1	1	NO	5	3	1
Public Place	2	BLACK PIKE FAVORITES PRESENTS STONERIDER HOLOGRAMEUROPEAN TOUR 2016 GARAGET /AVESTA 23/9 www.stoneriderband.com | www.blackpikefavorites.com	2016-09-29 12:57:51	1864		2	20	2	1	3	Y	4	4	1	YES	6	3	2
Public Place	3	HEDEMORA BLUES JAM OPEN STAGE Perfect Blue Sky JANE KITTO, AUSTRALIA/PNA ANDERSSON, SWEDEN Husband: Annas blueskok NN NN NN NN 1 okt från kl 14 Kom med ditt instrument/och eller din röst. Backline och husband finns. OBS! Jammare - kom i god tid! Alla under 18 år i målsmans sällskap. Facebook: Hedemora Blues Jam Fri entré med bidrag till mjölkkrukan välkomnas Swish ### @Kings Arms • Hedemora • ###	2016-09-29 12:58:47	1864		2	20	1	2	1	Y	3	2	2	NO	6	3	2
Public Place	1	GRUVPUNKEN 5 ÅR NORBERG 5-6 AUGUSTI 2016 ALONZO & FAS 3 + GÄSTER + LILLASYSTER SMASH INTE PIECES • FUCK FRANKIE COMMINOR • PSYKBRYT • MATRIARKATET TROUBLEMAKERS • THE SENSITIVES • SPIFF BARARMÖSSEN • GRÅSUGGORNA • SLAKTKNIV ADAM NILSSON & INSATSSTYRKAN • KRÖSUS PSYKOFANT • BETONGGOLV • MARYS KIDS TÄLTCAMPING FINNS I DIREKT ANSLUTNING TILL FESTIVALOMRÅDET CAMPING FÖR HUSVAGN/HUSBIL FINNS 300 M FRÅ…	2016-09-29 13:02:04	1864		2	20	2	2	1	Y	3	1	1	YES	6	1	2
School	1	KUNG FU! Nybörjarträningar måndagar och onsdagar med start måndagen den 29 agusti. Provträna tre gånger gratis innan du bestämmer dig! Kung Fu Lek 17.30-18.30 barn och föräldrar tränar tillsammans. Juniorer, 11-14 år 18.30-19.30 Vuxna, från 14 år och uppåt 19.30-20.30 Välkomna! Umeå Hung Gar, Bryggargatan 10(bakom Charlies kiosk), Teg www.hunggar.se	2016-09-29 12:39:34	1885		1	20	1	2	1	N	2	2	1	YES	6	2	2
Supermarket	1	CATERING Ödsmålsburgaren GRILLEVENT FÖLJ OSS PÅ facebook swish @@@ ### Vi levererar maten varm till er året runt. Vi är även med på evenemang som tex. kalas, firmafester. ÖDSMÅLSBURGAREN 100 gr................................40 kr 200 gr...............................60 kr 300 gr...............................70 kr PULLED PORK BURGER med Coleslaw....................70 kr ÄDELOSTBURGAREN 250 gr...…	2016-09-29 12:41:41	1934		1	3	2	2	1	N	3	2	1	NO	6	1	2
Supermarket	1	Bokashi Lördagen den 8 oktober klockan 11.00 - ca 14.00 Häggvallskolan NN från mikrojord håller föredrag om fermenteringsprocessen (nedbrytning) med Bokashi. Bokashifermentering är en jäsning, som på några veckor förvandlar köksavfall och växtrester till en näringsrik mylla, rik på enzymer, vitaminer och antioxidanter. När kompostmyllan grävs ner i jorden tillför man bra mikroorganismer vilket ök…	2016-09-29 12:44:01	1934		1	12	1	1	1	Y	2	3	1	YES	6	1	2
School	1	Tegs fritidsgård Till helgen blir det både svett och glamour på Tegs fritidsgård! Fredag 19-23 Ultimate Dodgeball! Lördag 19-23 Nagellacksfrossa! Välkomna! UMEÅ KOMMUN www.umea.se/tegsfritidsgard	2016-09-29 12:52:45	1885		1	20	4	2	1	Y	2	2	1	YES	6	1	2
School	1	Är det här din verklighet? Cirka sex elever i varje skola mobbas av andra elever Ungefär fyra elever i varje skola får stryk av andra elever Runt en elev i varje klass blir mobbad av sin lärare Du har rätt till hjälp!	2016-09-29 13:04:52	1876	2	1	24	1	1	1	Y	3		1			1	2
Supermarket	1	Musikkvällar 18.00 1/10 I SIONKYRKAN BJÖRKE EN LÖRDAG I MÅNADEN HAR VI I SIONKYRKAN BJÖRKE MUSIKKVÄLL. VI HÅLLER PÅ C:A 1 TIMME OCH FIKAR EFTER. VÄLKOMMEN! SIONKYRKAN, BJÖRKEVÄGEN 101, WWW.SIONKYRKAN.SE NN NN	2016-09-29 14:04:40	1871		2	20	1	2	1	Y	4	4	1	YES	6	3	2
Supermarket	2	Py Bäckman Vid flygeln Rune Broberg NÄTRA KYRKA FRE 7/10 19.00 Pastoratets körer medverkar Förköp Nätra pastorsexp och Sidensjö f-hem Pris 50:- Välkomna!	2016-09-29 14:40:53	1944		1	20	1	2	1	Y	3	2	1	NO	4	1	2
Supermarket	1	DISCO ÅTEGÅRDEN 30/9 KL 18.30-20.30 Alla barn upp till 13 år är välkomna! 20 kr inträde. Godis och fika finns att köpa!	2016-09-29 14:48:43	1944		1	20		2	1	Y	2	2	1	NO	4	1	2
Supermarket	1	Bjästa-gympan I Bjästaskolans gympasal MOTIONSGYMPA: Måndagar 18.30 - 19.30 Torsdagar 19.00 – 20.00 (För tjejer o killar i alla åldrar) Vi kör igång igen Måndagen den 5 september	2016-09-29 16:26:50	1944		1	20		2	1	Y	2	4	1	NO	1	1	2
Supermarket	1	Underhållning på Bjästagården Fredag 30/9 kl. 13.30 Kompisar Pris 40:- Fikaförsäljning Medarr: ABF Välkommen åter önskar Kafferasten!	2016-09-29 16:31:01	1944		1	20	1	2	1	Y	4	1	1	NO	4	1	1
Supermarket	1	BARNENS EKUMENISKA KYRKSÖNDAG Söndag 2 oktober i Nätra kyrka Kl. 11 GUDSTJÄNST med små och stora - Bibelutbildning till våra 5-åringar - Sång av pysselkörerna Efter gudstjänsten: - Fika i församlingsgården - Gratisfiskdamm för barnen - Köp av grillad korv - Tipsslinga - Kasttävling VÄLKOMMEN! Ett arrangemang av alla kyrkor i Nätra	2016-09-29 16:38:31	1944		1	17	1	2	1	Y	3	3	1	NO	4	1	2
Supermarket	1	LOPPIS SÖNDAGEN DEN 2/10 KL. 11-15 ___ GATAN 6 VÄLKOMNA!	2016-09-29 16:45:10	1944		1	2	7	1	1	Y	1	1	1	NO	4	1	1
Public Place	1	HÖSTMARKNAD TREKÖVERN I ELDSMARK Söndagen den 25 september 11.00 till 15.00 NN ###, ### NN ###, ###	2016-09-29 14:49:05	1852		1	20	1	1	1	Y	2	3	1	NO	1	2	2
Public Place	1	HUSUMS BIBLIOTEK Bemannade öppettider Mån 9:00-19:00 Ons 9:00-16:00 Tor 9:00-16:00 LUNCHSTÄNGT 12.30-13.30 Meröppet Mån-fre 7:00-21:00 VÄLKOMMEN TILL DITT MERÖPPNA BIBLIOTEK I HUSUM!	2016-09-29 14:52:41	1852		1	24	1	1	1	Y	2	1	1	NO	5	2	2
Public Place	2	MEDICINSK YOGA i HUSUM KURSSTART söndag 18 september Söndagar 16.00-17.15, 5 ggr 850kr Plats: IOGT-NTO Anmälan med namn och telefon till: NN HATHAYOGA i HUSUM KURSSTART söndag 23 oktober Söndagar 17.00-18.15, 5 ggr 850kr Plats: IOGT-NTO. Anmälan med namn och telefonnummer till: NN	2016-09-29 14:57:41	1852		1	3	2	1	1	Y	2	2	1	NO	3	2	2
Public Place	1	Vi restaurerar och förstorar även dina gamla foton! - Bröllop - Barn/Familjefotografering - Event - Reklam/Produktfotografering Vi finns i Nordmaling på Orrvägen 10 ID-foto på 5 minuter! Ring och boka Din tid på ### eller ### Följ oss gärna på Facebook jocfoto www.facebook.com/jocfoto	2016-09-29 15:03:28	1852		1	3	2	1	1	Y	3	5	1	YES	6	2	2
Public Place	1	Alluthyrning.se NORDMALING ERBJUDER ER ATT HYRA BIL-BUSS-LASTBIL Stubbfräs-Elverk-Tält Ring för information & priser: Tfn ### Eller skicka frågan till: @@@ Vi erbjuder även hjälp med! Leverans av fordon Utkörning av maskinerna Montage av tältet Stubbfräsning Bortforsling av flis efter fräsning Återfyllning med jord Med mera Ring eller mejla för mer info	2016-09-29 15:09:20	1852		1	6	2	1	1	Y	2	1	1	NO	6		2
Public Place	1	STÖD LAGET, UTMANA VÄNNERNA OCH TÄVLA OM KRYMMA PRISER I GULDFEMMAN HOS FRISKA VILJOR FC guldfemman.se/friska-viljor-fc KÖP DIN FEMMA PÅ HEMSIDAN VINN LÅNGWEEKEND VINN EN RESA VINN LÅNGWEEKEND	2016-09-29 17:01:34	1944		1	20	1	2	1	N	3	2	1	YES	2	3	2
Public Place	1	Hovslagare Jag heter Pernilla, är hovslagare och har precis flyttat till Avesta. Skor både rid och travhästar, flexibel när det gäller arbetstider, jobbar både kvällar och helger. Min aktuella prislista: Helskoning: 1000kr Halvskoning: 650 kr verkning: 500 Tappsko: 200 kr Priserna är inkl. moms (25%) Företaget innehar F-skattsedel och är givetvis ansvarsförsäkrat =) Välkomna att kontakta mig! =)	2016-09-29 18:41:49	1864		2	3	2	2	1	Y	2	2	1	NO			1
Supermarket	1	Du som är danssugen SPF Seniorerna Orsa inbjuder till Dans på Skeer i Orsa fredag 23 september kl 19.00–23.00 Pär Norlings Entre 140:– inkl kaffe med smörgås Välkomna tilen trevlig danskväll !!! Festkommittén SPF SENIORERNA Orsa	2016-09-29 19:18:57	1963		1	20	1	2	1	Y	3	1	1	NO	4	1	1
Supermarket	1	HUND KLIPP HUND KLIPP Säljes Köpes Byte Nu är det vår är det nån som behöver hjälp att klippa sin hund? Klipper även klor Namn NN Adress Mora OBS! Fyll i datum - uppsatt den 11/4 Nedtages efter 1 månad	2016-09-29 19:27:24	1963		1	3	7	2	1	Y	4	1	1	NO	1	1	2
Supermarket	1	Säljes Köpes Byte ÖNSKAR HYRE GARAGE eller UPPSTÄllNING PLATS FÖR1-2 BilAR ORSA el MORA EJ MEK ENDAST UPPSTÄllNING ### OBS! Fyll i datum - uppsatt den: Nedtages efter 1 månad	2016-09-29 19:35:38	1963		1	5	7	1	1	Y	4	1	1	NO	1	1	1
Supermarket	1	Välkomna till öppnaförskolan Kom till oss på öppenförskola i Orsa Församlingshem Måndag till Torsdag 09.00 – 12.00 Barn 1-6 år	2016-09-29 19:47:17	1963		1	20	1	2	1	Y	4	4	3	NO	4	1	2
Supermarket	1	Djurläkarn i Orsa Veterinärer NN & NN Klinik och Butik Järnvägsgatan 21,Orsa Tidbokning ### Vardagar 8.00-9.00 övrig tid svarar vi i mån av tid. @@@ Öppettider: Måndag Till fredag 8.00-17.00 Kvällsöppet torsdagar till 20.00,	2016-09-29 19:49:27	1963		1	3	2	1	1	Y	2	3	1	NO	6		1
Supermarket	1	Lilla Eko Boden Välkommen till Orsas nya ekologiska bod! En butik för dig som vill köpa hälsosam god mat och andra ekologiska produkter. Här hittar du bland annat Orsaburgaren, vår egen veganburgare som är baserad på groddade mungbönor och råris. Vi finns på Stormyrgatan 7 ovanför Orsa Cykel & Motor. Tel: ### @@@ www.facebook.com/lillaekoboden/	2016-09-29 19:52:56	1963		1	2	2	1	1	Y	2	5	1	YES	6	1	2
Supermarket	1	Ved Säljes Sågad och kluven björk och bland ved. Hemtransport ingår såklart 400 kr/kubik Daniel ### el. ### el. ###	2016-09-29 19:54:39	1963		1	2	7	1	1	Y	4	1	1	NO	1	1	1
Supermarket	1	SÄLJES Elcykel GIANT 7vx 5 mils räckvidd per laddning Lågt insteg , från 2013 Pris: 8000:- ###	2016-09-29 19:56:25	1963		1	2	7	1	1	Y	1	1	1	NO	1	1	1
Supermarket	1	BÅT TILL SALU Jofa Bris 4 X 1,60 DUBBELBÅTTNAD Ring ### För INF	2016-09-29 19:58:09	1963		1	2	7	1	1	Y	1	1	1	NO	1	1	1
Supermarket	1	Smidgården i Fryksås Fryksås fäbod 12 km från Orsa Stugor *SPA * Mat * Café Cafè & restaurang Sommaröppet kl 11-17 Alla dagar 25 juni- 14 aug Bagarstugan öppen lördagar 25 juni - 2 sep Hantverksdag 30 juli Smidgården I FRYKSÅS Restaurang Lissäng på Smidgården i Fryksås Fryksås fäbod, tel ### * smidgarden.se * lissang.se	2016-09-29 20:09:45	1963		1	3	2	1	1	Y	3	2	1	YES	6	1	2
Supermarket	1	YTTERDÖRR 2 glas "Bra Pris" H.2.10 B.1.40 TEAK Ring. ### För iNF	2016-09-29 20:14:18	1963		1	2	7	1	1	Y	1	4	1	NO	1	1	2
Supermarket	4	MATRÄTTEN – för allas rätt till mat NN är två år gammal. Hon är en av 795 miljoner människor som ofta äter för lite, för näringsfattigt och för sällan. Trots att mat är en mänsklig rättighet. Trots att jordens resurser skulle kunna föda oss alla. Var med och bekämpa en av världens största orättvisor! SMS:a MAT till 72905 och ge 100kr FÖR ALLAS RÄTT TILL MAT Swisha valfritt belopp till 9001223 PG …	2016-09-29 20:19:05	1963		1	24	1	1	1	Y	3	2	1	NO	5	1	2
Supermarket	1	Karate och Ju-jutsu Självförsvar med tradition och kvalitet Träning i Bergetskolans gymn.sal (Orsa) • Ju-jutsu och självförsvar Olika system för barn och vuxna • Judo (integrerat i ju-jutsu träningen) • Karate Kom och prova på gratis Nybörjare i alla åldrar En rolig och allsidig motionsform 90 klubbar i hela landet Börja träna nu Ju-jutsu är roligt Terminsavgift 150kr t.o.m 25 år, 300kr för äldre…	2016-09-29 20:21:48	1963		1	20	1	1	1	Y	3	2	1	YES	6	1	2
Supermarket	1	YAMAHA DT 50MX KÖPES Ring eller Maila NN ### @@@	2016-09-29 20:23:12	1963		1	2	7	1	1	Y	4	2	1	NO	6	1	2
Supermarket	1	KÖPES Äldre veteranbil köpes. Gärna någon avglömd som står på någon loge el liknande Gärna Gamla VW folkvagn-buss Pickup-50-60-70 tal Amazon, Pv, Citroen ds mm . Allt av intresse. Tips mottages om var det finns någon bil också. / NN ###	2016-09-29 20:24:27	1963		1	2	7	1	1	Y	1	1	1	NO	1	1	1
Supermarket	1	THE LOBSTER ORSA FILM KLUBB PRESENTERAR VAR: Röda Kvarn, Orsa NÄR: 20 September, kl. 20.00 Pris 60:- (kontant betalning) eller medlemskort A GENUINE ONE-OFF, COOL, SMART AND DIZZYINGLY FUNNY THE LOBSTER A FILM BY YORGOS LANTHIMOS Tis 20 september kl. 20.00 The Lobster	2016-09-29 20:26:58	1963		1	20	1	1	1	Y	3	2	1			1	2
Supermarket	1	Byggställning? Måla om? Renovera? Bygga? Nu hyr vi ut vår mycket smidiga fasadställning i aluminium. Totalt 384 kvm + 2st trapptorn. Vi hjälper även till med montering/demontering och transport, Ring idag och boka! ### eller prata med Kaptens Motor. Kaptens motor Tranmyrvägen 1 • 79430 ORSA • ### Byggfyhren.com -High Quality Constructions-	2016-09-29 20:28:47	1963		1	6	2	1	1	Y	3	2	1	NO	6	1	2
Supermarket	1	Musik i Orsa Församling LUNCHMUSIK "Höstbetraktelser" NN, recitation NN, accordeon, orgel Orsa Kyrka 22/9 kl 12.00 Sopplunch i Församlingshemmet Välkommen! Svenska kyrkan i samarbete med sensus	2016-09-29 20:30:36	1963		1	20	1	1	1	Y	3	3	1	NO	4	1	2
Supermarket	1	Svenska kyrkan ORSA FÖRSAMLING Onsdag 21/9 kl 08.30 Orsa Kyrka MORGONMÄSSA Frukostsamling i församlingshemmet Onsdag 21/9 kl 13.30 Skattunnge Kyrka ”Öppen Kyrka” Högläsning ur Bibeln, med präst NN Fika och samtal om allt mallan himmal och jord Torsdag 22/9 kl 12.00 Orsa Kyrka LUNCHMUSIK ”Höstbetraktelser” NN, recitation - NN, accordeon , orgel Sopplunch i Församlingshemmet Söndag 25/9 kl 11.00 Or…	2016-09-29 20:32:43	1963		1	17	1	1	1	Y	3	1	1	YES	6	1	2
Supermarket	1	NJUT I ORSA NATUREN Guidning i vildmarken och i odlingslandskapet Guided tours Geführte Touren Välkommen! Welcome! Willkommen Tel ###	2016-09-29 20:34:23	1963		1	20	1	1	1	Y	2	2	3			1	2
Supermarket	1	Custom Car Club Ungdom ORSA 27:e augusti 14:00 öppnar vi äntligen garaget! Motorintresserad? Välkomen! Den 27:e augusti kl. 14 slår vi upp portarna till garaget (i gamla Teaterbaren vid lilla rondellen). Alla ungdomar med ett intresse för fordon är mer än välkomna. Ta med dig din EPA om du har en och dina polare och kom, så bjuder vi på fika. Kurrar det i magen finns det hamburgare att köpa. Tyvä…	2016-09-29 20:36:09	1963		1	20	1	1	1	Y	3	1	1				2
Supermarket	1	www.tallhed.com Tallhed Stugor & Natur 12 km norr om Orsa (RV 45) ###	2016-09-29 20:37:20	1963		1	5	2	1	1	Y	2	2	1	YES	6		2
Supermarket	1	EFTERLYSNING!!! SVART HONKATT CA 1 ÅR FÖRSVANN FRÅN UPPFINNARVÄGEN TACKSAM FÖR ALL INFORMATION ###	2016-09-29 20:38:42	1963		1	9	7	1	1	Y	1	1	1	NO	1	1	1
Supermarket	1	Vi söker engagerade familjer VILL NI BLI FAMILJEHEM? Att vara familjehem innebär att man för kortare eller längre tid tar emot ett barn eller en ungdom i sitt hem. Att vara familjehem inbär inte att man behöver vara expert på barn och unga men det krävs att man har en öppen, trygg och stabil familjesituation. Det är också bra om du har erfarenhet av nära relationer med barn och unga antingen geno…	2016-09-29 20:41:23	1963		1	24	2	1	1	Y	3	2	1	YES	6	1	2
Supermarket	1	Säljes 500:- ###	2016-09-29 20:43:15	1963		1	2	7	1	1	Y	1	2	1	NO	1	1	2
Public Place	1	Röda Korset Leksand Tar tacksamt emot: Kläder Prylar Möbler Kan hjälpa till med hämtning vid behov. Öppettider Onsdag 12-18 Torsdag 12-18 Fredag 12-17 Lördag 10-14 Telnr till Mötesplats Kupan ### Vi svarar när det är öppet. Adress: Leksandsvägen 14 (Hemköpshuset)	2016-09-30 07:41:06	1951		2	24	1	1	1	Y	2	1	1	NO	6	3	2
Public Place	1	KOM SÅ STICKAR VI! Öppen stickgrupp I SOCKENSTUGAN varannan onsdag kl16 jämna veckor från 7/9 Prat och fika	2016-09-30 07:43:23	1951		2	20	1	2	1	Y	2	2	1	NO	5	3	2
Public Place	1	Grötfrukost för Djurakarlar Hästen 2016 Havre eller manna? Plats: Sockenstugan i Djura Tid: Onsdagar 1 en gång i månaden kl 9.00 Datum: 7 september, 12 oktober, 2 november och 7 december Ta gärna med dig en vän! Välkommen! Svenska Kyrkan DJURA	2016-09-30 07:58:00	1951		2	20	1	2	1	Y	2	2	1	NO	4	3	2
Public Place	1	RAGDOLLSPECIAL PÅ LÖRDAGEN DALÄLVS KATTEN Dalälvskatten Internationella KATTUTSTÄLLNING LUGNET, FALUN 1 & 2 Oktober 2016 ÖPPET FÖR PUBLIK KL 09.00-15.00 50:- vuxen, 100:- familj, 20:- under 16 år	2016-09-30 08:08:24	1951		2	20	1	2	1	Y	3	2	1	YES	6	3	2
Public Place	1	DJURA HEMBYGDS- FÖRENING OBS !!!! Årets planerande brasafton på hembygdsgården är INSTÄLLD. Vi kommer igen med inbjudan nästa år!	2016-09-30 08:20:59	1951		2	24	1	1	1	Y	2	4	1	NO	5		2
Public Place	1	DALARNA EDITION GASOLINE SWAP MEET MUSKELBILAR - HOT ROD - BIKE - KUSTOM - RACE 24:e SEPTEMBER 10:00-16:00 BILUTSTÄLLNING • PINSTRIPARE RESTAURANG • FINBILSPARKERING KLUBBTRÄFFAR • TATUERADE NYHAMMARS BRUK, NYHAMMAR WWW.GASOLINEMAGAZINE.SE	2016-09-30 08:22:10	1951		2	20	1	2	1	Y	3	2	1	YES	6		2
Public Place	1	DJURA HEMBYGDS- FÖRENING Välkomna till invigningen av statyn Carin Ersdotter - Den wackra Dalkullan Söndag 18 september Kl 15.00 vid Djura Kyrka Medverkande: Skulptör NN NN Djura kyrko- och hembygdskör Spelmän Djura Hembygdsförening i samarbete med Studiefrämjandet	2016-09-30 08:25:12	1951		2	20	1	2	1	Y	2	4	1	NO	4	3	2
Public Place	1	Öppet Hus Djura Sockenstuga tisdag 4/10 kl. 14.00 Möt NN! -Hockeyproffs, Leksands IF, 1966-1983 NN berättar om hur han värvdes till Leksands IF som 18-åring, om Svenskt Mästerskap och karriär. Han jämför också dagens ishockey med sin tid som elitspelare. Välkommen! sensus Svenska kyrkan DJURA	2016-09-30 08:33:39	1951		2	20	1	2	1	Y	3	2	1	NO	4	3	2
Public Place	1	HALLÅ! Nu måste vi hjälpas åt att övertyga kommunen att vi alla önskar att ha vår skola kvar i Djura. Den har stor gympasal, nyrenoverat kök, fin skolgård och bra läge. Den är navet i vår bygd. Om du håller med, skicka ett brev till Leksands Kommun / NN och för fram din åsikt!	2016-09-30 08:40:23	1951		2	23		1	1	Y	2	1	1	NO	5	1	1
Public Place	1	I Ottilias fotspår.... "Systrarna Adelborg och 1890-talets kvinnorörelse" Föredrag av NN, ordförande i Stiftelsen Gagnefs Minnesstuga Söndag 9 oktober 2016 kl 15.00 Församlingshemmet, Gagnefs kyrkby Vi bjuder på kaffe. Fri entré ALLA VARMT VÄLKOMNA Arrangör: Ottilia Adelborgs Vänförening Med stöd från Gagnefs kommun	2016-09-30 07:47:39	1951		2	12	1	2	1	Y	2	4	1	NO	4	3	2
Public Place	1	LEKSTUGA ÖNSKAS KÖPA ASTRID NN ### ###	2016-09-30 07:54:49	1951		2	2	7	2	1	Y	1	4	1	NO	1	3	2
Public Place	1	UPPHITTAT Kastspö med rulle Kan återfås mot beskrivning ###	2016-09-30 07:58:36	1951		2	10	7	1	1	Y	1	1	1	NO	1	1	1
Public Place	1	Behöver du hjälp med det elektriska? kontakta Kenneth Olsson, elinstallatör med allmänbehörighet Telefon : ### @@@	2016-09-30 08:02:32	1951		2	3	2	1	1	Y	2	1	1	NO	6		1
Other	2	Öppet Hus Djura Sockenstuga tisdag 4/10 kl. 14.00 Möt NN! -Hockeyproffs, Leksands IF, 1966-1983 NN berättar om hur han värvdes till Leksands IF som 18-åring, om Svenskt Mästerskap och karriär. Han jämför också dagens ishockey med sin tid som elitspelare. Välkommen! sensus Svenska kyrkan DJURA	2016-09-30 07:49:56	1951		2	20	1	2	1	Y	3	2	1	NO	4	3	2
Public Place	1	A-M´s Gottebod Mousserande dryck & marmelad från Grangärde Musteri Pelles Pölsa från Rältagården Till grillen: Hans Dala-Korv Té,kaffe & kryddor från AFTEK, Arbrå SIA-glass Godisremmar,marmelad,kola från Ryfors Konfektyr,Mullsjö Godis & kylda drycker Turistinformation Servetter,muggar,kuddar, kort m.m. - När FIKA-skylten är ute, säljer vi kaffe med hembakt bröd! Vi tar emot kontant betalning & SW…	2016-09-30 07:51:03	1951		2	2	2	1	1	Y	2	3	1	NO	6	1	2
Other	1	TACK SNÄLLA DU SOM TOG HAND OM MITT BAND!! HAR SWISHAT HITTELÖN TILL ###. Mvh NN HOPPAS DET ÄR OK TILLFALLER VÄL BYN	2016-09-30 07:56:39	1951		2	24	7	2	1	Y	1	1	1	NO	1		1
Public Place	1	Loppis 2 st loppisar bara 3km mellan varann !! Öppet lördag och söndag september ut. Kl: 11-17. 50 % Rea på allt från 25 kr på ___ vägen 1 i Djura. Fynda tex: Tidningen rekord, sportböcker, plantor, porslin, serietidningar, mm. Ring vid frågor: ### Sätt priset själv vid loppisen vid ___ vägen 18 i Rälta. Fynda tex: Plantor, kläder, porslin, gardiner och tyger och mycke mer. Ring vid frågor : ###.…	2016-09-30 08:20:22	1951		2	2	7	2	1	Y	2	3	1	NO	6	1	2
Public Place	1	Natur- & kulturvårdanden åtgärder Vi hjälper er med • Siktröjning & gallring • Skonsam huggning & skotning i fäbodsmiljö • Vedhuggning & skotning Spiks Naturvård – på naturens villkor ### www.spiksnaturvard.se @@@	2016-09-30 08:32:37	1951		2	3	2	1	1	Y	2	1	1	YES	6	3	1
Public Place	1	HJÄÄLP!!...med gräsklippning? Gräsklippning,trimmning, slyröjning stora som små gräsytor. Pris: enl. överrenskommelse. Klippbredd på maskin 1,4m-2.9m Innehar F-skatt Ring:### mvh NN	2016-09-30 08:32:46	1951		2	3	2	1	1	Y	2	2	1	NO	1	3	1
Supermarket	1	KARLSKRONA MUAY THAI Höstträning 30/8 - 31/12 Träningsavgifter Ungdomer upp till 15 år - 400kr Ungdomer 15 - 17 år - 700kr 18 år och uppåt - 1500kr Betala til bankgiro 509 6151 mån tis ons tors fre lör 17.00-18.00 18.00-19.30 19.30-20.00 Morning training and PT sessions also available. Talk to our trainers for mor info. Train hard, fight easy	2016-09-30 10:55:59	1952		1	20	1	2	1	N	3	1	2	NO	5	2	2
Supermarket	1	HUNDENS DAG PÅ HAVGÅRDENS CAFÉ LÖR 24/9 KL 11-17 Kl 12-15 finns hundinstuktör/psykolog Inger Borg hos oss & svarar på dina HUNDFRÅGOR & berättar om hunsporten NOSEWORK. Kl 15.00 HUNDPROMENAD med start & stopp vid caféet (ingen kostnad). 10% på allt från HUNDMENYN hela dagen! VARMT VÄLKOMMEN	2016-09-30 11:12:53	1952		1	20	2	1	1	Y	2	1	1	NO	4		1
Public Place	4	Jularbo-dagen 2016 EN KONSERTDAG MED HUVUDVIKT PÅ CALLES OCH EBBES MUSIK ÅRETS MEDVERKANDE: PETER HARRYSON Från ”Så ska det låta” och ”Rederiet” Gitarrist BENGT MAGNUSSON NILS FLÄCKE LEIF GÖRAS MED VÄNNER ANDERS LARSSON LINDA KARLSSON STOCKHOLM ACCORDION CLUB Programledare: Lena Jularbo_Brauner och Håkan Pettersson AVESTA TEATER Frejgatan 1, 774 41 Avesta Lördagen den 5 november 2016 kl. 13.00 Bi…	2016-09-30 15:51:03	1864		2	20	1	1	1	Y	3	2	1	NO	6	3	2
Public Place	2	ÅKERBRUKET Second Handbutik i Karlbo LOPPIS Besök på Björkstigen 1 i Karlbo Telefon ### Öppettider: Tisdag - Lördag 10:00 - 18:00 Söndagar och Måndagar stängt	2016-09-30 16:00:37	1864		2	2	2	1	1	Y	2	1	1	NO	6	3	2
Public Place	2	leparse.com smycken online LE PARSE leparse leparses	2016-09-30 16:03:12	1864		2	2	2	1	1	Y	2	1	1	YES	6	3	2
Public Place	2	LOPPIS FORS FOLKETS HUS LÖRDAG 3 SEPTEMBER KL. 10.00 - 15.00 VILL DU BOKA BORD? INOMHUS 200:-/ BORD (1,80X80 CM) UTOMHUS 100:-/PLATS BAKLUCKELOPPIS BOKNING: ### INFO: ### NN ### NN FIKA OCH KORV SÄLJS VÄLKOMNA!	2016-09-30 16:07:38	1864		2	2	1	1	1	Y	2	2	1	NO	6	3	1
Public Place	1	SÖDRA DALARNA AVESTA • HEDEMORA • SÄTER 2 - 4 september 2016 Välkomna till årets matspaningar med klass! Kom - dofta, smaka, handla och njut av vad våra 46 mathantverkare, gårdsbutiker, caféer, restauranger med flera har att erbjuda i dagarna tre! • Öppet hus hos våra mathantverkare med varierade öppentider. • Pris till årets Skördefesthjärta på Genuin Dalamarknad 2 sept kl 14 • Pajtävling - öppe…	2016-09-30 16:15:10	1864		2	20	1	1	1	Y	3	2	1	YES	2	2	2
Public Place	3	Picknick på slagfältet av Fernando Arrabal Regi: Thomas Herrgård Medverkande: NN NN NN NN NN NN PREMIÄR 24/9 19.00 Övriga speldagar 25/9 15.00, 28/9 19.00 1/10 15.00 och 19.00 2/10 15.00 BILJETTER: ### BERGSLAGS- Teatern www.bergslagsteatern.se	2016-09-30 16:20:42	1864		2	20	1	1	1	Y	3	2	1	YES	6	1	2
Public Place	1	Nu kör vi igen: • Kidsvolley Level 1- födda 09/10 Tisdagar kl. 18.00-19.00 i Skogsbo skola, v. 37-48 (uppehåll v. 44). Du som förälder eller annan vuxen anhörig är alltid ombytt och deltar aktivt i de övningar som sker under passen. Anmälan senast fredag 9 september till NN ### • Kidsvolley Level 2- födda 07/08 Tisdagar kl. 17.00-18.00 i Skogsbo skola, v. 35-49 (uppehåll v. 44). För anmälan och i…	2016-09-30 16:41:57	1864		2	20	1	1	1	N	3	2	1	YES	6	3	2
Public Place	2	GÅRDSLOPPIS I RUTBO %%% och %%% Lördagen den 24 september Kl. 10-14 Massor av prylar, julsaker ,mattor, leksaker, TV-bänk, säng med lådor mm. Även lingon. Inställt vid ihållande regn.	2016-09-30 16:44:42	1864		2	2	7	1	1	Y	2	1	1	NO	4	1	1
Public Place	1	Mattias Rudin Healing och Tarot. Är du sugen på att veta din framtid? Problem med en situation? Problem med en relation? Låt mig spå dig i mina tarotkort Prislista för mina tjänster. *Healing med regnbågsflamman 100 kr *Regnbågsflammankurs 500 kr *Personligt horoskop 500 kr *Ett kraftdjur 20 kr... *Auraavläsning 100 kr * tarotläggning medicin hjulet 12 kort 250 kr *tarotläggning keltiska korset 1…	2016-09-30 16:55:12	1864		2	24	7	2	1	Y	2	1	1	NO	1	1	1
Public Place	1	ZUMBA Höstens träningar startar den 29 augusti 2016 MÅNDAGAR Markusskolan, Avesta kl 17:30 - 18:15 ZUMBA Kids 7-11 år Markusskolan, Avesta kl 18:30 - 19:00 ZUMBA Burst (intensiv) TISDAGAR Hede Bystuga, Västanhede kl 17:30 - 18:15 ZUMBA Kids Jr 4-6 år Hede Bystuga, Västanhede kl 18:30 - 19:30 ZUMBA Fitness ONSDAGAR Nyhyttan, IOGT-NTO Logen kl 18:00 - 19:00 ZUMBA Gold (lugnt tempo) Nyhyttan, IOGT-N…	2016-09-30 17:07:09	1864		2	20	2	1	1	Y	2	1	1	YES	6	3	1
Public Place	2	GÅRDSLOPPIS i LYCKA FORS I Lagå´rn SÖNDAG 25 SEPTEMBER 10:00-15:00 Flera säljare Bruksföremål Antikt o Kuriosa. Loppis nytt o gammalt. KOM O FYNDA !! Hyr Plats Sälj själv Info ###.###	2016-09-30 17:10:48	1864		2	2		1	1	Y	2	1	1	NO	6	3	1
Public Place	1	Välkommen till butiken för dig med STÖRRE STORLEKAR! Nu är butiken full av höstens härligheter! LauRie Pont Neuf vogue trofé Ciso ZE-ZE Stationsg. 27 KRYLBO | ### YR Plus Size Kläder www.ycrklader.se Måndag stängt, tis-fre 11-18 (lunchstängt 13-14), lörd 10-14	2016-09-30 17:11:50	1864		2	2	2	1	1	Y	3	2	1	YES	6	3	2
Public Place	3	20-års jubileum Antik- och Samlarmässa Välkommen tilll Samlarmässan Med Antikt och Kuriosa Cupolen, Avesta Folkets Park Lördag 15/10 Kl. 9.30-15.00 Fri entré Arrangör: Södra Dalarnas Myntklubb	2016-09-30 17:12:49	1864		2	20	1	1	1	Y	2	2	1	NO	4	2	2
Public Place	1	NU kör vi igång! LOPPIS Avestaparken sön 25/9 kl 10-14 SAIF SKOGSBO AVESTA 1989 Även Lör 29 okt & Lör 3 dec VÄLKOMNA! Boka bord: Kansliet kl 10-14 ###	2016-09-30 17:13:59	1864		2	2	1	1	1	Y	2	2	1	NO	6	1	2
Public Place	1	Barngympa Dags för barngympa i Djurås gymnastiksal. Finns något för alla åldrar, 1-12 år. Start v.38 onsdagar 16.00-17.00. tom v.50 För mer info ring ### Eller gå med i facebook gruppen "Barngymnastik i djuråsskolan" Anmälan via facebook eller ring numret ovan // NN	2016-09-30 16:16:35	1951		2	20		2	1	N	2	1	1	NO	6	1	1
Public Place	1	Ryttare/Hästägare som berörs På förekommen anledning får vi be er ta upp hästspillning från byns vägar. Bybor har ringt och klagat på att spillning ligger kvar på vägar och att dyngan hamnar i bilgarage och på tomter. Enligt uppdrag V Djurmo samfällighetsförening Vid frågor ring ###	2016-09-30 16:21:08	1951		2	24	1	1	1	Y	2	1	1	NO	1	1	1
Public Place	1	TV-ANTENN SIGNALPROBLEM? Ring Roger ### Vardagar 8 -16 F:a Leonet, godkänd för F-skatt	2016-10-02 09:59:25	1858		2	3	2	1	1	Y	2	1	1	NO	1	3	1
Public Place	1	FÖNSTERMARKIS 185 x 65cm 300:- ### Finns i Läjet	2016-10-02 09:59:58	1858		2	2	7	1	1	Y	2	2	1	NO	1	3	2
Public Place	1	HÅR FIXARNA Vi har öppet mån-fre 9.00-18.00 Tångvägen 30 i Läjet Tel. ### VÄLKOMMEN IN! www.harfixarna.nu	2016-10-02 10:12:52	1858		2	3	2	1	1	Y	3	1	1	YES	6	3	1
Supermarket	1	För dig som vill ha bra musik Till fest underhållning eller dans Boka JAN-ÅKES` ###	2016-10-02 13:01:33	1889		1	3	7	1	1	Y	2	1	1	NO	1	1	1
Supermarket	2	Antikt, kuriosa, loppis, Säljer, köper, byter, Ring för visning ###	2016-10-02 13:06:34	1889		1	2	7	1	1	Y	2	2	1	NO	1	2	2
Supermarket	1	Hejsan! Mitt namn är NN och jag är 20 år gammal. Jag kommer från Stockholm där jag för nuvarande jobbar som Personlig tränare och Gruppträningsinstruktör på ett Gym. Jag har precis fått reda på att jag blivit antagen till ett treårigt program på Örebro Universitet till hösten och söker därmed någonstans att bo. Jag önskar hyra en lägenhet med en hyra på max 4500 kronor. Jag är främst ute efter en…	2016-10-02 13:07:27	1889		1	5	7	1	1	Y	2	3	1	NO	1		2
	1	Garage / Parkeringsplats önskas Hyra I eller runt Tybble. /NN, ###	2016-10-02 13:08:09	1889			5	7	1	1	Y	2	1	1	NO	1	1	1
	1	Behöver du någon att prata med Vi lyssnar och ger stöd Örebro Tjejjour TJEJER SOM LYSSNAR PÅ TJEJER - SEDAN 2006 - Måndagar 18-21 Telefon: ### • Mail: @@@ www.orebrotjejjour.se	2016-10-02 13:09:38	1889			24	1	1	1	Y	3	3	1	YES	6	1	2
	1	Å-stadsloppet ÖREBRO 2016 15 oktober 2016 n nethouse 11:E ÅRET! Start och mål i Tybblelundshallen Funktionströja till alla deltagare DM i halvmaraton Del i Löpex Sports Långloppscup 21 km 10 km 5 km ### astadsloppet.se @astadsloppet	2016-10-02 13:14:11	1889			18	1	1	1	Y	3	3	1	YES	6	3	2
	1	1/8 Säljes Barnvagn Brio Happy Sitt och liggdel , regnöverdrag, insektsnätt m.m. Begagnad men i funktionsdugligt skick 500:– ###	2016-10-02 13:14:39	1889			2	7	1	1	Y	1	1	1	NO	1	1	1
	1	ABF ARBETARNAS BILDNINGSFÖRBUND SÖKES: LEDARE I KÖRSÅNG! Nu söker vi nya ledare till flera av våra körer! Är du en engagerande och social person som har kunskap om körsång och notläsning, samt ledig tid någon kväll i veckan? Arvode enligt överenskommelse. KONTAKTA OSS! @@@ ### www.abf.se/orebrolan	2016-10-02 13:18:02	1889			24	1	2	1	Y	3	5	1	YES	6	1	2
	1	Gå på tur i sommar! Läs mer om våra guidade fjällturer på www.fjällsupporten.se Kontakt: @@@ ###	2016-10-02 13:48:39	1889			3	2	1	1	Y	3	2	1	YES	6		2
Public Place	1	Två nya mottagningar för hivtest med snabbsvar på Noaks Ark Två nya mottagningar för hivtest med snabbsvar har öppnats på Noaks Ark i Norrköping respektive Växjö under året. Utvärderingarna visar att alla besökare varit nöjda med att kunna testa sig gratis och anonymt utan att behöva boka tid. – Vi nekar aldrig någon att testa sig, hos oss är alla välkomna och så borde det vara överallt, menar NN…	2016-10-02 13:58:51	1864		1	24	5	1	1	Y	3	2	1	NO	4	1	2
Public Place	1	Jag badar - en monolog om dyslexi Teater av och med NN Falu statsbibliotek 1/10 kl 12.00 - 12.40 Borlänge bibliotek 1/10 kl 14.00 - 14.40 Fri entré "Jag badar" är en djupt personlig, både smärtsam och humoristisk, monolog om en dyslektikers liv. Föreställningen är en del av Dyslexiveckan i Falun och Borlänge. Arrangemang: Falu stadsbibliotek, Borlänge bibliotek, ABF Dalarna	2016-10-02 19:19:16	1897		2	24	4	1	1	Y	3	5	1	NO	4	3	2
Public Place	1	Sensommarvisor Borlänge Blåsorkester NN. dirigent Musikgudstjänst NN. präst NN. orgel SÖNDAG 2 OKTOBER KL.18.00 Stora Tuna kyrka www.svenskakyrkan.se/borlange Svenska kyrkan BORLÄNGE	2016-10-02 19:31:55	1897		2	24	1	2	1	Y	3	5	1	YES	2	1	2
Public Place	1	Succén tillbaka! Örongodis med Lars Roos & Borlänge kammarkör 16 oktober kl 18.00 Missionskyrkan, Borlänge Dirigent: NN 250:– / 125:–, barn upp till 15 år Biljetter säljs på Turistbyrån www.borlängekammarkor.se i samarbete med ABF ARBETARNAS BILDNINGSFÖRBUD FIRST	2016-10-03 05:47:42	1897		2	24	1	2	1	Y	3	5	1	YES	2	1	2
Library	1	MUSIK I DALARNA EN UDDA FÅGEL KAMMARMUSIK Dalasinfoniettans Mats Heinemann och träblåssektionen bjuder på ett program med trumpeten i centrum - en udda fågel inom kammarmusiken. En spännande musikupplevelse där du får stifta nya bekantskaper då Mats med van hand guidar publiken genom kompositioner av bland andra den tyske kompositören Paul Hindemith och schweizaren Heinrich Sutermeister. FREDAG 3…	2016-10-03 05:49:55	1897		1	24	1	2	1	Y	3	5	1	YES	2	4	2
Library	1	www.dalarnasmuseum.se Vem får kalla sig kulla? NIRVANA GHARNI FOTO&FILM 10/9 2016 - 29/1 2017 Dalarnas museum	2016-10-03 05:55:43	1897		1	24	2	2	1	Y	3	5	3	YES	6	4	2
Library	1	KONST I KVADRAT Fredag 30 sept kl 18-22 Entré 40 kr Förfest och försmak Magasinet Falun Lördag-Söndag 1-2 oktober kl 11–17 Ateljéer och pop up gallerier Falun/Borlänge Samlingsutställning Magasinet Falun www.konstikvadrat.se Ladda ner vår konstkarta på konstikvadrat.se	2016-10-03 06:00:27	1897		1	24	2	2	1	Y	3	3	1	YES	2	4	2
Library	1	Konstrunda Falun/Borlänge www.konstikvadrat.se Fredag 30 sept kl 18-22 Entré 40 kr Förfest och försmak Magasinet Falun Lördag–Söndag 1–2 oktober kl 11-17 Ateljéer och pop up-gallerier Falun/Borlänge Samlingsutställning Magasinet Falun www.konstikvadrat.se KONST I KVADRAT Ladda ner vår konstkarta på konstikvadrat.se	2016-10-03 06:01:50	1897		1	24	2	2	1	Y	3	3	1	YES	2	4	2
Supermarket	1	En europeisk familj Söker efter ett hus eller lägenhet Två personer utan barn och husdjur. Rökfri. Betalar i tid. Tel ###	2016-10-03 08:18:48	1952		1	5	7	1	1	Y	2	1	1	NO	1	2	1
Other	1	Vill Ni Sälja er Stuga? Hör av er till oss. Vi är ett par som bor i Gävle. Vill så gärna hittaen kollonistuga. Tycker att området är så vackert och välskött. Ring NN ### NN ###	2016-10-03 09:03:27	1871		2	2	7	2	1	Y	1	1	1	NO	1	1	1
Other	1	TRÄDFÄLLNING Har du träd du vill ha hjälp med Ring oss vi har utbildade och erfaren personal Vi utför allt från beskärningar av fruktträd till att sektionsfälla dina problemträd Vi hjälper även till med allt annat du behöver i din trädgård Vi har f-skatt sedel och försäkringar Ring oss NN ### Gå gärna in på vår hemsida för att se fler bilder www.milodis.se	2016-10-03 09:04:56	1871		2	3	2	2	1	Y	3	2	1	YES	6	3	2
Other	1	Vattenavstängning Söndag 2 oktober kl. 14.00 Efter avstängningen ska alla kranar öppnas så systemet töms.	2016-10-03 09:05:07	1871	4	2	24	8	1	1	Y	2	3	1	NO	5	3	2
Other	1	TRÄDFÄLLNING Vi vårdar, beskär, stabiliserar, skyddar, och fäller i stora och små trädbestånd. En del av de tjänster vi utför är; Trädfällning Sektionsfällning Trädbeskärning Trädvård Trädinventering Kontakta oss så kan vi lämna kostnadsfri offert och råd kring dina träd! ### abergsskogskonsult.com NN @@@ ÅBERGS SKOGSKONSULT Åbergs skogskonsult har ansvarsförsäkring, innehar F-skattesedel och är …	2016-10-03 09:06:31	1871	4	2	3	2	1	1	Y	2	3	1	YES	6	3	1
Supermarket	1	VILL DU BLI PIGGARE OCH KOMMA IFORM RING NN ### WWW.BRAFORM.NU KOD:JIMZ	2016-10-03 10:44:23	1892		1	18	2	1	1	Y	2	1	1	YES	6	1	1
Supermarket	1	BROSTORPS BED & BREAKFAST Hjärtligt välkomna till Brostorps Bed & Breakfast i den gamla barnvaktarstugan mellan Brösarp och Maglehem vid porten till Österlen. Ni får ha övervåningen för er själva där finns ett dubbelrum med sköna DUX-sängar, eget badrum och hall. Den generösa frukosten tillagar efter era önskemål – kanske ägg från huset egna höns, skulle smaka? Brostorp ligger i bokskogen några s…	2016-10-04 07:37:54	1892		1	3	2	1	1	Y	2	5	1	YES	6	3	2
Supermarket	1	DRAKÄNGEN TRÄDGÅRDSVÅRD NATURVÅRD RÅDGIVNING Behöver du hjälp med din trädgård eller tomt? Vi utför trädgårdsvård, naturvård och rådgivning. Enstaka tillfälen eller löpande skötsel under säsongen. I trädgården jobbar vi t.ex. med ogräsrensning, klippning av buskar och häckar, plantering ,anlänggning av rabatter eller anläggning med natursten. Vi kan skapa eller restaurera slåtterängar, både i lit…	2016-10-04 07:42:32	1892		1	3	2	1	1	Y	2	2	1	YES	6	1	2
Supermarket	1	BARNLOPPIS Kanske dags att fynda något bättre begangnat? Kläder, leksaker & skor VAR? Fd Hemslöjdsboden, Degeberga NÄR? Torsdagen 29 september kl. 17-20 Fredagen 30 september kl. 10-17 Lördagen 1 oktober kl. 10-12 Obs! Halva priset på ALLT under lördagens försälning VARMT VÄLKOMNA	2016-10-04 07:48:08	1892		1	2	1	1	1	Y	2	3	1	NO	4	1	2
Supermarket	1	ISLANDSHÄST TURRIDNING PÅ HAVÄNG Upplev Havängs vackra natur och sommaren på bästa sätt, från hästryggen! 2 timmars ritt med fika 600 kr/ pers 4 timmars ritt med lunch 1 150 kr/ pers Turridning både för nybörjare och erfarna. För mer information och bokning kontakta NN på ### eller på Facebook: TanjaZ We speak English, Wir sprechen deutsch!	2016-10-04 07:52:15	1892		1	3	2	1	1	Y	2	2	3	NO	6	1	2
Supermarket	1	PÅ BESÖK KIT ALEXI LOUISE EBBMAR JONAS ROOTH GUNILLA SUNSTRÖM KATTARINA YXHUFVUD 5 MAJ – 9 OKTOBER CHRISTINEHOFS SLOTT ÖPPETTIDER 5/5 - 3/7 SAMT 13/8 - 4/9 HELGER KL. 11-15 4/7 - 7/8 DAGLIGEN KL. 11-16 ENTRÉ 80 KR CHRISTINEHOFS EKOPARK I SAMARBETE MED ÖSKG TJÖRNEDALA KONSTHALL	2016-10-04 07:55:16	1892		1	24	2	1	1	Y	3	5	1	NO	4	1	2
Supermarket	1	Söndagen den 24 juli: NN berättar om glaset i USA, vad hon sett under sina resor och ger en inblick i ett av världens glasmeckan. Föredraget börjar kl 16.00 och är gratis för Österlens Glashyttas Vänner medlemmar och kostar 100 kr för icke medlemmar. Fika finnas att köpa i glashyttan. Boka gör ni på @@@ eller ### senast den 22 juli ÖPPET ÅRET RUNT i glashyttan med möjllighet att boka föredrag, pr…	2016-10-04 07:57:04	1892		1	12	2	1	1	Y	2	2	1	YES	6	1	2
Supermarket	1	Piknickbänk 1200 Kr beställ nu för leverans inom 2 veckor Bordsshivans storlek 183 x 745 cm Kan demonteras för transport Stark konstruktion av tryckimpregnerad furu levereras och monteras fritt i Brösarp området ###	2016-10-04 07:58:50	1892		1	2	7	1	1	Y	2	2	1	NO	1	1	1
Supermarket	1	Teater & dans – hösten 2016 Trans[e]ición Hur gestaltas en andlig kraft? Var möts klubbvärldens repetitiva form med traditionella transtekniker? Den svensk-kubanska dansgruppen SOMOS utforskar detta i sitt nya verk. Tor 22 sep kl 19 Fre 23 sep kl 11 (skolförest.) Jonebergshallen Somos Dance Company Ide & koreografi: NN medverkande: 4 dansare 50 min 120 kr, scenpass 100, unga 80/50 Kalevalaskåpet …	2016-10-04 08:00:32	1892		1	24	8	1	1	Y	3	5	1			1	2
Supermarket	1	Jonebergshallen, Simrishamn Torsdag 22 september kl 19.00 Biljetter à 120 kr/100 kr medlem. Ungdom 80 kr/50 kr medlem på Bokvaruhuset, Simrishamn. Arrangör: Simrishamns Riksteaterföreställning	2016-10-04 08:10:13	1892		1	24	2	1	1	Y	3	2	1	NO	4	1	2
Supermarket	1	EXTRAINKOMST! Vi behöver snarast hjälp av fler kreativa personer (18+) som kan jobba hel eller deltid för möjligheter till extra inkomst varje månad. Är detta Din möjlighet till en förändring? Ring idag NN ###	2016-10-04 08:14:44	1892		1	3	7	1	1	Y	2	1	1	NO	1	1	1
Supermarket	1	RAVLUNDA CYKEL UTHYRNING & FÖRSÄLJNING Vi levererar & hämtar Stora grupper är välkomna Vi har ett av Sveriges största urval av vuxen- och barncyklar samt tillbehör för uthyrning. www.ravlundacykel.se Upplev Österlen på cykel ! @@@ Mobil ### Ravlunda ###	2016-10-04 08:15:56	1892		1	6	2	1	1	Y	3	3	1	YES	6	1	2
Supermarket	1	Antikt, Retro – Jätteloppis Försälnjingsyta ca 900 m2 Kom och fynda!!!!!! Öppettider: 1 oktober kl 10.00-16.00 8 oktober kl 10.00-16.00 15 oktober kl 10.00-16.00 22 oktober kl 10.00-16.00 29 oktober kl 10.00-16.00 4 november kl 16.00-20.00 5 november kl10,00-20.00 Övriga tider efter överenskommelse!!!!!! ALLT I ALLO HALLEN (FD PERSSONS MÖBLER) Herrestads vägen 3, 27650 Hammenhög Tel ### eller ###…	2016-10-04 09:42:01	1892		1	2	2	1	1	Y	2	1	1	YES	6	1	1
Supermarket	1	S Mellby kyrka Tyst meditation SÖNDAGAR KL 18 4 september 18 september 2 oktober 16 oktober 30 oktober 13 november Svenska Kyrkan KIVIKS FÖRSAMLING	2016-10-04 09:46:29	1892		1	17	1	1	1	Y	3	3	1	NO	4	1	1
Supermarket	1	Terminsstart Brösarps Scoutkår Torsdagen den 8 september drar höstens scouttermin igång! Tiden är 18.30-20.00 och platsen är scoutstugan (Du hittar stu- Gan längs med riksvägen mellan Ystad och Kristianstad, strax norr om Brö- sarp. Skylt "Hörröd" sväng vänster/höger . Första huset till vänster. Rött tegelhus). I höst kommer vi erbjuda verksamhet för: Spårare: (7)8-9 år Ansvarig: Emma: ### Upptäc…	2016-10-04 09:49:36	1892		1	24	1	1	1	Y	2	3	1	NO	6	1	2
Supermarket	1	Trivselkväll Hembygdsparken i Degeberga onsdagen den 5 oktober kl. 19.00 Kjellardrängarna Underhållning med traditionell irländsk musik – och svenska visor Entré: 60:-. Kaffe och hembakat ingår. Lotteriförsäljning Gårds Härads Hembygdsförening i samarbete med Studieförbundet Vexenskolan	2016-10-04 09:51:29	1892		1	24	2	1	1	Y	2	5	1	NO	4	1	2
Supermarket	1	Allt i Allo ÖSTERLENKONSULT AB Försäkringsförmedling Hushållsnära tjänster Tömning av dödsbo Trädgårdsarbete Gräsklippning Flyttstädning Hustillsyn Städning m.m.	2016-10-04 09:54:31	1892		1	3	2	1	1	Y	3	1	1	NO		1	2
Supermarket	1	Emmaljunga barnvagn + åkbräda Emmaljunga Crossway barnvagn med regnskydd och nytvättat tyg. Justerbar mellan olika sitt-och ligglägen. Sittdelen är vändbar så du väljer själv om barnet tittar mot dig eller framåt. Säkerhetsbälte finns i sitsen och förvaringspåse till regnskyddet hänger i ramen under sittdelen. Förvaringsgaller finns under vagnen. Åkbräda/ståbräda som äldre barn kan stå på medfölj…	2016-10-04 09:56:21	1892		1	2	7	1	1	Y	2	2	1	YES	6	1	2
Supermarket	1	Jazz spelas hos Cake Cowboy lördag den 30 juli kl.13 – 15 med NOSO, New Orleans Sunshine Band! Kom och njut av härlig jazz i harmoni med chokladtoner och desserter! Countrykväll hos Cake Cowboy lördag den 15 oktober kl.18 – 21 med härliga Anna Jois! Kom och njut av choklad, grillning och umgås i countrytoner! On the road again Cake Cowboy	2016-10-04 09:58:11	1892		1	3	2	1	1	Y	3	5	1	NO	4	1	2
Supermarket	1	Eriksdal Rör AB Värmeinstallation Rörläggning Svetsning ### @@@	2016-10-04 11:02:31	1892		1	3	2	1	1	Y	3	5	1	NO	6	1	2
Supermarket	1	SOMMARLYX Entré till SPA med lån av handduk och Badrock Fruktfat samt 25 minuters Behandling pris: 598 kr/p Brösarp Gästgifveri & SPA Albovägen 19 – 27350 Brusarp – ### www.gastis.se – @@@	2016-10-04 11:03:35	1892		1	3	2	1	1	Y	2	5	1	YES	6	1	2
Supermarket	1	SALTO MORTALE industriellt vintage antikt Öppet högsäsong: Ons-Sön 10-17 lågsäsong: Lör-Sön 11-17	2016-10-04 11:05:14	1892		1	2	2	1	1	Y	2	2	1	YES	6	1	2
Supermarket	1	FASTIGHETSUNDERHÅLL JÖRGEN ###	2016-10-04 11:07:11	1892		1	3	7	1	1	Y	1	1	1	NO	1	1	1
Supermarket	1	Cykel köpes ! Dam / Herr även defekt max 3 växlad ring ###	2016-10-04 11:08:49	1892		1	2	7	1	1	Y	1	1	1	NO	1	1	1
Supermarket	1	FOTVÅRD Låt mig ta hand om dina fötter! Jag har öppnat Medicinsk Fotvård på Brösarps Gästis SPA. Hjärtligt välkomna önskar NN Diplomerad Mediclinsk Fotvårdare För tidsbokning ring ### I samarbete med Brösarps Gästgifveri och Spa	2016-10-04 11:10:25	1892		1	3	2	1	1	Y	2	3	1	NO	1	1	1
Supermarket	1	Nu kommer hösten med stormsteg. Det är nu vi ska komma samman och ha kul en stund. Jag kör i höst ett begränsat antal föredrag med inslag från 30 år som journalist. Och jag lovar er många glada skratt. NN Tidningsvärden är underbart allmänbildande, ofta stressig och framför allt inte sällan heltokig. Ni skulle bara veta. Och det får ni nu chansen till! Slå en signal så bokar vi in just DITT sälls…	2016-10-04 11:14:17	1892		1	12	2	1	1	Y	3	2	1	NO	6	1	2
Supermarket	1	Vi säljer 2 våningssängar som den på bilden för 500 kr st. De inköptes i november 2015. Finns på Kuskahusen Vandrahem uppe Vid Chistinehof. ###	2016-10-04 11:15:50	1892		1	2	7	1	1	Y	2	2	1	NO	1	1	2
Supermarket	1	Kaffestugan Alunbruket Alunbruket 101, 273 57 Brösarp Telefon ### www.alunbruket.com @@@ Välkommen till Skånes äldsta kaffestuga – här finner ni lugnet i sagolikt naturskön miljö. Korsvirkeslängan är byggd 1705 som arbetarbostad till Alubruket, en numera kulturminnesmärkt bygd i Verkaåns dalgång. Alunbruket var i drift 1637-1912. ”De röda backarna” blev därefter ett populärt utflyktsmål och 1930 …	2016-10-04 11:17:13	1892		1	3	2	1	1	Y	2	2	1	YES	6	1	2
Supermarket	1	Bartosz bygg & Renovering Professionella hantverkare i Skåne! Vi kan utföra de flesta arbeten åt Er inom: - snickeri - husbyggnation - murning - måleri - större trädgårdsarbeten - med mera KONTAKTA OSS IDAG! Tel: ### E-post: @@@ www.bbyggrenovering.se	2016-10-04 11:19:15	1892		1	3	2	1	1	Y	3	2	1	YES	6	1	2
Supermarket	1	Övernatta hos oss i Ravlunda __vägen 36 Rum till Uthyrning - Välkommen NN & NN ### ### @@@	2016-10-04 11:21:01	1892		1	3	7	1	1	Y	2	2	1	NO	6	1	2
Supermarket	1	OUT OF AFRICA Keramik, Presenter, hand-painted Candles Designer – Smycke ___ väg 3, S-27456 ___ Tel. ### Välkommen NN Onsdag - Söndag 1100 - 1800	2016-10-04 11:31:26	1892		1	2	7	1	1	Y	4	3	1	NO	6	1	1
Supermarket	1	Brösarps Bygdegård Presentbutik Öppet: Tors.14-18 • Fre.10-18 • Lör.10-16 • Sön.11-16 Dec, Juni Juli och Augusti öppet alla dagar Albovägen 36 Tel. ###	2016-10-04 11:33:07	1892		1	2	2	1	1	Y	2	1	1	NO	1	1	1
Supermarket	1	BOSTAD VI ÄR ETT PAR I MEDELÅLDERN SOM SÖKER ETT STÖRE BOENDE, VI BOR NU I VITABY I EN LITEN 1,5:A OCH SKULLE BEHÖVA EN STÖRE BOSTAD SOM LIGGER MERA CENTRALT OCH MED BÄTRE ALLMÄNNA KOMMUNIKATIONER. HUS ELLER LGH, BÅDA ÄR AV INTRESSE. OBS: HUMAN HYRA. MVH: NN RING ELLER MEJLA. MEJLADR:@@@ TEL:###	2016-10-04 11:34:36	1892		1	5	7	1	1	Y	2	1	1	NO	6	3	1
Supermarket	1	”Söta Kattungar” Bortskänkes till Bra hem. Ras Bondkatt Svar till ###	2016-10-04 11:41:14	1892		1	24	7	1	1	Y	1	1	1	NO	1	1	1
Supermarket	1	5år- Ha koll på olika happenings under hösten Kom igång! Låt oss hjälpa dig till ett lättare liv PROVA PÅ VECKA 36 - för dig som aldrig tränat hos oss gymmet i hammenhög funktionell träning! VÄLKOMMEN! GYM (ny cardiopark i höst) GRUPPTRÄNING (höstens schema start ve36) DANSGRUPPER 4ÅR-13ÅR(start ve 36 - föranmälan) Kondition-styrka för tjejer fred 15.30 killar ons 16.00 8-13 år rehab, massage, na…	2016-10-04 11:43:28	1892		1	18	2	1	1	Y	2	2	1	YES	6	1	2
Supermarket	1	PENSIONERAD YRKESMÅLARE LENNART JÖNSSON TEL: ### KL. 18.00 – 19.00	2016-10-04 11:45:40	1892		1	3	7	1	1	Y	2	1	1	NO	1	1	1
Supermarket	1	Tosarps Båtkapell & Tepetseri i Vanstad Nu är det vår och det börjar bli hög tid att se över era båtkapell nu innan sjösättning. Vi ör bl.a. lagningar på kapell, syr specialanpassade båtdynor, byter ruter på kapell och tält, sätter in nya dragkedjor och mycket mer. Min kraftiga industrimanskin kan även sy i tjockare skinn. Jag har varit verksam i flera år, men precis flyttat min verksamhet till V…	2016-10-04 11:47:50	1892		1	3	2	1	1	Y	2	1	1	NO	6	3	1
Supermarket	1	Till Salu Nybesiktigad Volvo 744 GL/SE-PKT 1992 Takbox och 4 vinterhjul medföljer. Ring ###	2016-10-05 07:25:55	1892		1	2	7	1	1	Y	4	1	1	NO	1	1	2
Supermarket	1	Soffbord i teak mått: b110d55h55 pris: 500:- Matgrupp i mörkbrunt trä 1 bord med 2 utdragsskivor mått: b128d80h73 skivor 2 80x30 5 stolar pris: 1600:-	2016-10-05 07:29:55	1892		1	2	7	1	1	Y	1	1	1	NO		1	1
Supermarket	1	Österlens Hemmafint Hushållsnära tjänster i hem och trägård Syateljé Butik med sydda plagg och prylar Sömnadshjälp - byte av blixtlås, upplägning av byxor, gardinsömnad m.m Välkommen till Österlens Hemmafint! Knacka-på-öppet-eller-ring ### ### www.hemmafint.com Österlens Hemmafint NN Norra Björstorp Brösarp	2016-10-05 07:31:22	1892		1	3	2	1	1	Y	2	5	1	YES	6	1	2
Supermarket	1	SHOPPINGRESA TILL TYSKLAND VÄLKOMMEN ATT ÅKA MED TILL HEILIGENHAFEN LÖDAGEN DEN 8/10 Frörums byalag har platser kvar på sin shoppingresa, så passa på att fylla på lagret inför hösten och vinter- tillsammans med ett glatt gäng. Lastar i Brösarp, Frörum, Skåne Tranås, Tomelilla Bindade anmälan. PRIS : 450:- ANMÄLEN SKER PÅ TELEFON : ### ### Mvh : NN och NN	2016-10-05 07:33:51	1892		1	3	1	1	1	Y	2	1	1	NO	1	1	1
Supermarket	1	GNIZTRA.COM UNIKA TING MED MYCKET BLING	2016-10-05 07:35:34	1892		1	2	2	1	1	Y	2	2	1	YES	2	3	2
Supermarket	1	Draken Kjetil En spännande opera för barn Sex drakar, en trollkarl, två dockor och fyra musiker bjuder på en fartfylld musikalisk upplevelse. En timme med starka känslor, hisnande äventyr och spännande teatereffekter för barn mellan 3-12 år. Mer än bara opera Äventyret fortsätter hemma där barnen kan läsa om drakarna i en pixibok, som alla får i samband med föreställningen och spela spel med drak…	2016-10-05 09:49:48	1892		1	3	2	1	1	Y	3	5	1	YES	6	1	2
Supermarket	1	Förtrollande på Skåneleden Söndagen 9 oktober kl. 10–16 Stenshuvud nationalpark/ naturum Välkommen till en magisk dag på Skåneleden! Följ med på olika vandringar med guide som bjuder på fängslande historier om mytomspunna Stenshuvud Nationalpark. Eller boka in dig på en vandring där kropp och hälsa står i fokus. Under dagen får du bland annat stifta bekantskap med den berättande Lövjerskan och mö…	2016-10-05 09:51:34	1892		1	24	4	1	1	Y	3	5	1	YES	2	1	2
Supermarket	1	KIVIKS BIO Program 2016 9 Sep - 30 Okt. DEN ALLVARSAMMA LEKEN Fre 9 Sep. 19:30 tid:1.55 7 år 80:- Journalisten Arvid Stjärmblom och konstnärsdottern Lydia Stillie träffas i skärgåden en försommarkväll och inlieder en romans med glider ifrån varandra och gifter sig på var sitt håll. Tio år senare träffas de igen. Drömmen om den stora och oförstörda kärleken är magnetisk och de inleder en passioner…	2016-10-11 11:16:53	1892		1	3	2	1	1	Y	3	2	1	NO	4	1	2
Supermarket	1	JAZZ PÅ ÖSTERLEN HÖSTEN 2016 Lördag 3 september kl 19.30 Gösta Werner Museet i Simrishamn SLIDING HAMMERS De två underbara trombonisterna Karin Hammar och Mimmi Hammar. Mathias Algotsson piano, Niklas Fernqvist kontrabas, Ronnie Gardiner trummor Lördag 24 september kl 19.30 Skeppet i Simrishamn SECOND LINE JAZZBAND Ett av Sveriges allra bästa tradjazzband. Jesper Albrektsson trp/voc, Niklas Carls…	2016-10-11 11:20:06	1892		1	3	1	1	1	Y	3	5	1	NO	4	3	2
Supermarket	1	Alla katter ska ha en ägare Vårda kastrera märka registrera Länsstyrelsen Skåne	2016-10-11 11:25:59	1892		1	24	4	1	1	Y	3	3	1	NO	5	2	2
Public Place	1	Hunden Texas är FÖRSVUNNEN Försvann måndag 5/9 i __. Synts till både i __ och vid tippen Ingarvet! Har du sett Texas? Snälla ring GENAST till ägaren NN ### Texas är en rädd och skygg hund, van att hålla sej undan och klara sej själv. Texas är kastrerad, väger 23 kilo och är ca 50 cm hög. En riktigt tuffing! Men snäll!!! Saknas enormt i sin familj av både tvåbenta och fyrbenta. Hittelön 1000:- til…	2016-10-03 11:30:35	1897		2	9	7	1	1	Y	2	5	1	NO	6	1	2
Supermarket	1	Stockrosen Bed and Breakfast Välkommen till oss Vi hyr ut vårt fina gästhus till dig som vill besöka natursköna Köpegårda, utanför Karlshamn i Blekinge. Gästhuset är byggt 2014 och består av två rum (2+4 bäddar), pentry och badrum med bastu. Havet finns på gångavstånd (ca 700m) och skog samt klätterklippa alldeles i närheten. Välkommen att njuta av härligt sommarliv på landet! /Familjen Petersson…	2016-10-03 11:53:27	1970		1	3	7	2	1	Y	2	2	1	NO	1	1	2
Supermarket	1	Kura skymning Onsdag den 5 oktober kl. 18.00 Kom till hembygdsgården och hör Olars-Maja och Lill-Skytten berätta om sina spännande liv. Inträde 50 kr, lättare förtäring ingår. OBS! Begränsat antal platser! Föranmäl dig till NN ### Varmt välkomna! Hille Hembygdsföreningen www.hillehembygd.se	2016-10-03 13:10:45	1871		2	12	1	2	1	Y	2	3	1	YES	6	3	1
Public Place	1	Välkommen till KOL-skolan För dig som har KOL och vill lära dig mer om sjukdomen och få bättre livskvalitet. Du får information av läkare, sjukgymnast, arbetsterapeut, distriktssköterska, dietist och kurator. Kursstart varje vår och höst med ett tillfälle per vecka i 6 veckor. Kontakta KOL-sköterskan på din Hälsocentral för anmälan. Välkommen! Landstinget Västernorrland.	2016-10-04 18:16:48	1852		1	12	5	1	1	Y	2	5	1	NO	4	1	2
Public Place	1	VATTENGYMNASTIK Välkommen att delta i vår Vattengymnastik......... En härlig stärkande träningsform som är skonsam för leder samtidigt som den är konditions-och muskelstärkande. Övningarna sker till inspirerande musik. Kondition, smidighet och styrka varvas under ca 40 min långa pass. 9 badgrupper finns att välja på: Måndag kl 13.20 och 14.10 Tisdag kl 9.00 och 17.30 Onsdag kl 13.20 och 16.40 och…	2016-10-04 18:24:18	1852		1	18	1	1	1	Y	2	2	1	NO	1	1	2
Public Place	1	KOM OCH TA EN FIKA PÅ CAFE DUVAN. HEMBAKAT BRÖD TILL ETT LÅGT PRIS. ÖPPETTIDER: MÅN-FRE 10.30–15.00 I KYRKANS HUS VID HÄLSOCENTRALEN VI HAR ÄVEN EN PRESENT SHOP OCH ETT LOPPIS MED BRA PRISER! VÄLKOMNA TILL EN FIN STUND MED MÖJLIGHET ATT GÖRA FYND. Svenska kyrkan GRUNDSUNDA FÖRSAMLING	2016-10-04 18:27:47	1852		1	3	1	1	1	Y	2	5	1	NO	4	1	2
Supermarket	2	HÖSTMARKNAD TREKLÖVERN i ELDSMARK Söndagen den 25 september 11.00 till 15.00 NN ###, ### NN ###, ###	2016-10-04 18:32:06	1852		1	20	1	1	1	Y	2	3	1	NO	1	2	2
Supermarket	1	KLÄDER SKOR PRYLAR m.m. SECOND HAND SHOP & MÖTESPLATS LÖRDAGAR KL 10-13. Korskyrkan - Dombäcksövägen 8 - Husum SHOP, MÖTESPLATS OCH SERVERING Behållningen går till flyktningarbete VÄLKOMNA! Korskyrkan, EFS, Pingstkyrkan	2016-10-04 18:35:10	1852		1	3	1	1	1	Y	2	3	1	NO	4	2	2
Supermarket	1	Shabby Chic inredning. Blommor. Gran. Vetekuddar. LOPPIS. ___ vägen 3 Gideå. Intill Kyrkan i Gideå. Öppet. Söndagar kl 1300- 1800. Har även öppet under veckan när jag är hemma. Går bra att ringa för annan tid. ### Välkomna	2016-10-04 18:38:19	1852		1	2	7	1	1	Y	1	1	1	NO	1	2	1
Supermarket	3	HÖSTMARKNAD TREKLÖVERN i ELDSMARK Söndagen den 25 september 11.00 till 15.00 NN ###, ### NN ###, ###	2016-10-04 18:42:20	1852		2	20	1	1	1	Y	2	3	1	NO	1	1	2
Supermarket	2	KLÄDER SKOR PRYLAR m.m. SECOND HAND SHOP & MÖTESPLATS LÖRDAGAR KL 10-13. Korskyrkan - Dombäcksövägen 8 - Husum SHOP, MÖTESPLATS OCH SERVERING Behållningen går till flyktningarbete VÄLKOMNA! Korskyrkan, EFS, Pingstkyrkan	2016-10-04 18:44:19	1852		2	3	1	1	1	Y	2	3	1	NO	4		2
Supermarket	3	MEDICINSK YOGA i HUSUM KURSSTART söndag 18 september Söndagar 16.00-17.15, 5 ggr 850kr Plats: IOGT-NTO Anmälan med namn och telefon till: NN HATHAYOGA i HUSUM KURSSTART söndag 23 oktober Söndagar 17.00-18.15, 5 ggr 850kr Plats: IOGT-NTO. Anmälan med namn och telefonnummer till: NN	2016-10-04 18:47:03	1852		2	3	2	1	1	Y	2	2	1	NO	3	1	2
Supermarket	2	Behöver ni hjälp med att ? Gräva eller rensa ett dike. Byta en vägtrumma Gräva avlopp/vatten Dränering Ta bort stubbar/stenar Ja allt som det kan behövas en grävare till. Eller Lastbilstransporter Ring! ÖNSKA GRÄV ###	2016-10-04 18:48:34	1852		2	3	2	1	1	Y	2	2	1	NO	1	3	1
Supermarket	1	Ö-viks HUSVAGNSKLUBB Campa tryggt under hela året Bli medlem i Örnsköldsviks Husvagnsklubb - en vacker plats vid Skulesjön och mitt i Höga Kusten samt nära till Skuleskogens Nationalpark Välkommen! För mer information ring ### eller ### eller ###	2016-10-04 18:52:34	1852		2	3	1	1	1	Y	2	5	1	NO	1	3	2
Supermarket	1	Hundens Dag Lördag den 24/9 har vi fullt fokus på våra hundar som vi tycker så gränslöst mycket om. Vi firar med kalasfina erbjudanden, specialpriser på foder, godis och mycket annat i butiken. Vi har Fanny och hunden Arko som är hundekipage inom polisen som kommer visa situatiner med figurant man kan stöta på i tjänsten. Micke Månsson kommer kunna ta fina foton på era hundar. Lisa som är cert. c…	2016-10-05 11:38:12	1952		1	24	2	2	1	Y	3	5	1	NO	1		2
Supermarket	1	YOGA Tis, kl. 19-21, start 13/9. Drop in t.o.m. v.43 MEDITATION 10 veckors kurs Onsdagar kl. 20-21 DROP IN, start 14/9 LJUDHEALING 7 veckors kurs Tisdagar kl. 18-18.45 DROP IN, start 13/9 Byggmästaregat. 1, Långö, Karlskrona www.natha.se @@@ tel.### FB/natha.karlskrona Samverkan: NBV	2016-10-05 11:53:56	1952		1	3	2	2	1	Y	2	2	1	YES	6		2
Other	1	Välkommen Ullas fotvård Med.fotterapeut Även hembesök Öppet måndag t torsdag Kl 9-12 fredag stängt Tel ### Johannes Birgers väg 5A	2016-10-06 08:08:10	1922		1	3	2	1	1	Y	2	1	1	NO	6	1	1
Other	1	Herrcyckel Damcyckel Köpes I Bra skick Monark Crecent Skeppshult Sjösala, Puch Ring ###	2016-10-06 08:13:58	1922		1	2	7	1	1	Y	1	1	1	NO	1	1	2
Other	1	Varm Garage med litet Lagerutrymme hyres varm garage Bra pris I ca 1-2 år ###	2016-10-06 08:17:52	1922		1	5	7	1	1	Y	1	1	1	NO	1	1	2
Other	1	Köpes Åkgräsklippare Husqvarna Rider 115-200 Serien Lite använd Nyskick eller Körd lite Betalar Mellan 10,000-15000 kr Ring ###	2016-10-06 08:23:22	1922		1	2	7	1	1	Y	1	1	1	NO	1	1	2
Other	1	Vem vill skänka ge bort lite päron och goda äpplen ser att det finns mycket här i glommen innan det är försent Ring mig Peter ### eller ### Tack!	2016-10-06 09:04:37	1922		1	24	7	1	1	Y	1	1	1	NO	1	1	2
Other	1	Lämna in allt från barncyklar till barnkläder till försäljning! Falkenbergs Barnmarknad Anmäl dig innan den 3 april! www.falkenbergsbarnmarknad.se www.falkenbergsbarnmarknad.se	2016-10-06 09:23:36	1922		1	2	2	1	1	Y	2	3	1	YES	2	1	2
Other	1	Köpes Röjsåg 345,545 Motorsåg 550XPG 450XP 560XP Husqvarna Bra Begagnad eller Nyskick Köpes Till Bra Priser Ring ###	2016-10-06 09:27:23	1922		1	2	7	1	1	Y	1	1	1	NO	1	1	2
Other	1	Björnhults ponnyridning UF Har du ett barn som är mellan 4-8 år och är intresserand av att börja rida? Då är ni välkomna till Björnhult (Falkenberg) för att prova på att rida på våra små och söta shetlandsponnier. Ni kan läsa mer om det på vår facebook, Björnhults ponny ridning UF. Gå in och ge oss en like. Pris 100 kr Ni kan höra av er om frågor och bokning av tider på telefon numret: NN: ### Vä…	2016-10-06 09:32:35	1922		1	3	2	1	1	Y	2	5	1	NO	1		2
Other	1	Annas Krukor & Fat Morup Annas Krukor & Fat Ateljé och butik Keramiker NN Tobiasa gård Morup 517 311 90 Morup NN NN @@@ www.annalea.se Öppet Ons-Fre 12-18 Lörd 11-14 Övrig tid ring! Välkomna! Vägbeskrivning: Avfart 52 från E6/E20 kör 1 km mot Morup/Falkenberg se skylt krukmakeri	2016-10-06 09:49:29	1922		1	2	2	1	1	Y	3	2	1	YES	6	1	2
Other	1	Annies Stuga Inredningsbutiken i Glommen Ni hittar butiken på Glumstensvägen 25 i Glommen. I stugan finner ni inredning, smycken och delikatesser från välkända märken. Soliga sommardagar finns även chans till en ficka utanför stugan. Vi säljer även SIA-glass. Öppettider Torsdag & Fredag kl. 14.00-18.00 Fr.o.m. 2 juli öppnas stugan 13.00 på tors & fre Lördag & Söndag 11.00-16.00 Webb: anniesstuga.…	2016-10-06 09:54:40	1922		1	2	2	2	1	Y	2	3	1	YES	6	1	1
Public Place	1	Behöver du fisketillbehör? Vi säljer spön, drag, linor m.m. Välkommen till Grimeton Lantmän. Grimeton Lantmän Källängsvägen 1 43298 Grimeton Tel. ###	2016-10-09 11:33:12	1858		2	2	2	1	1	Y	2	5	1	NO	1	3	2
Private Place	1	Familjegudstjänst Söndag 16/10 kl 16.00 Hille Kyrka Barnkören Decibellen sjunger och vi får besök av clownen Molly. Vi delar ut Barnbibel till de som under året fyller 5 år och bok till den som fyller 3 år. Välkomna stora som små! Svenska kyrkan I HILLE	2016-10-11 06:42:57	1871		2	24	1	2	1	Y	2	3	1	NO	4	3	2
Private Place	1	SOPPLUNCH Ons 19 okt kl 12.30 Hille Församlingsgård "Gammal dialekt och sägnen" NN & NN Varmt välkomna! Svenska Kyrkan I HILLE	2016-10-11 06:43:38	1871		2	3	1	2	1	Y	2	5	1	NO	4	3	2
Supermarket	1	Naturskyddsföreningen Ängelholm Honung och hälsa Kan honungsbin producera framtidens antibiotika? Mikrobiolog NN berättar om pågående forskning. Tisdag 20 september kl 19 Stadsbiblioteket Hörsalen Info ### PRODUKTER TILL FÖRSÄLJNING! För mer information: http://angelholn.naturskyddsforeningen.se/	2016-10-12 11:20:48	1931		1	12	1	1	1	Y	2	5	1	YES	6	4	2
Library	1	FORSKARKVÄLLAR MED LUNDS UNIVERSITET 7 september Ljuset som botar cancer – hur strålbehandling fungerar. NN. 4 oktober Inverkan av framtida klimatförändringar på kustprocesser. NN. 19 oktober Hur kan vi säkra våra städer mot översvämningar? NN 23 november Utfiskade hav och fattiga fiskare - kan ett ekonomiskt tankesätt hjälpa till att lösa problemen? NN. Ängelholms stadsbibliotek Onsdagarna 7/9, …	2016-10-12 11:33:37	1931		1	12	4	2	1	Y	3	5	1	NO	4	1	2
Library	1	ÄNGELHOLMS BIBLIOTEK PRESENTERAR BOKSAMTAL Visst är det härligt att höra någon tala om en riktigt bra bok! Vi tar till vara på detta och träffas och samtalar om böcker vi läst. Under hösten har vi fyra träffar. Tid: Torsdagar 19:00 - 21:00 Datum: 22/9, 13/10, 17/11 och 15/12 Plats: Ängelholms stadsbibliotek. Anmälan senast dagen före i bibliotekets informationsdisk eller på telefon ### Ängelholms…	2016-10-12 11:38:07	1931		1	12	4	2	1	Y	2	3	1	NO	6	1	2
Other	1	Hemtjänst på dina villkor Har du eller någon du känner behov av hemtjänst? Falkenbergs Omsorg har ett tydligt fokus på dig som kund och på att du ska få en personlig kontakt som du trivs med. Detta innebär: -Vår personal är mycket duktiga i mötet med människor. -Vi arbetar i små personalgrupper med få medarbetare som hjälper dig. -Vi säger aldrig nej. Vi hittar lösningar och ser möjligheter. Kont…	2016-10-13 08:36:19	1922		1	3	2	1	1	Y	2	5	1	YES	6	1	2
Other	1	MATS RÅDBERG & RANKARNA 50-års jubilerar "En kväll med Robertson & Rådberg" Peta in en pinne i brasan Du kan alltid lita på pojkarna över 35 Den vita duvan mm Hundar, ungar och hembryggt äppelvin En femöres kola 100 dagar mm Monica Robertson En kväll med mycket musik, minnen, värme och skratt VARBERGS TEATER	2016-10-13 08:42:00	1922		1	24	1	1	1	Y	3	5	1	NO	4	3	2
Other	1	SECOND HAND Brohjälpen Smedjeholm Servicevägen 2, Falkenberg ÖPPET Onsdagar 13.00 - 18.00 Lördagar 10.00 - 13.00 Tel. ### KOM .. ...FYNDA TULLBROKYRKANS INTERNATIONELLA HJÄLPARBETE TULLBROKYRKAN BROHJÄLPEN	2016-10-13 08:54:20	1922		1	2	1	1	1	Y	2	3	1	NO	1	3	1
Other	1	Träna Yoga och Qigong!!! Karatehallen Start: 4/9 – söndagar) Qigong/Tai Chi Kl. 16.30-17.30 Yoga kl.17.30-19.00 Ledare: NN med mångårig erfarenhet av asiatisk rörelsekonst. Mer info och anmälan till NN tfn ### @@@	2016-10-13 08:56:40	1922		1	3	2	2	1	Y	2	3	1	NO	6	1	1
Other	1	WESTRING Kontrollansvar • Projektledning • Besiktningar Kontrollansvarig vid byggprojekt! • Kontrollansvarig vid bygg, rivnings- eller markåtgärder • Projektledning • Besiktningar • Gratis telefonsupport Kontrollansvaret är en del i byggbranschens kvalitetsledningssystem på byggarbetsplatsen. Mitt namn är NN. Jag är högskoleutbildad till Teknisk Fastighetsförvaltare. Jag har utfört uppdrag som ko…	2016-10-13 09:24:30	1922		1	3	2	1	1	Y	2	5	1	YES	6	1	2
Supermarket	1	HUS SÖKES När vår föräldrar skickar ut oss för att leka, känner vi ingen större inspiration. Vi har ju bar en liten rastgård! Många blåmärken blir det när vi ska rocka rockring och hjula på samma kvadratmeter. Så nu önskar vi att vi fick större trädgård. Och större hus. Gärna lite lantigt så här så vi kan ha djur. Typ en gris. Fast pappa säger att vi kan börja med höns, så vi får se sen. Att det …	2016-10-14 10:48:46	1952		1	5	7	1	1	Y	2	2	1	NO	1	1	2
Supermarket	1	NU ÄR NÄTTRABYS TENNISBANOR KLARA FÖR SPEL! BOKA TID OCH BETALA GÖR DU VID TENNISBANORNA. Medlemmar 40/timme Övriga. 60/timme Medlem blir du genom att sätta in 125 kronor på Postgiro 517308-3 Frågor? Kontakta NN på tel. ### eller mail: @@@	2016-10-18 09:07:59	1952		1	18	1	2	1	Y	3	3	1	NO	6	1	2
Supermarket	1	Nu kör vi igen Nättraby gymmix KARLSKRONA Core puls Onsdagar 18.00-19:00 Nättraby idrottshall lilla salen 30: / pass Nättraby 300:- / termin Nättraby Kommunanställda motionerar gratis i uppvisande av senaste lönebesked VÄLKOMNA	2016-10-19 07:05:19	1952		1	18	1	2	1	Y	2	3	1	NO	4	1	2
Other	1	Den här fina katten har bestämt sig för att flytta in hos oss. Det är en liten unge, hona och saknar halsband. Hör av dig till mig om du känner igen henne! NN ###	2016-10-20 08:08:41	1922		1	9	7	1	1	Y	4	2	1	NO	1	1	2
Other	1	"VINTERFÖRVARING" AV BILAR - BÅTAR HUSVAGNAR...... i GLOMMEN ###	2016-10-20 08:51:37	1922		1	3	7	1	1	Y	1	1	1	NO	1	3	1
Other	1	Morups Församling bjuder in Messy Church i Glommens Bygdegård mån 26 sep kl 17 Gyllene Regeln VARMT VÄLKOMNA! Alla får plats i Messy Church! Vi träffas för gemenskap, skapade, kyrka, lek och äter kvällsmat tillsammans. Välkomna alla barn, ungdomar,vuxna, äldre......	2016-10-20 09:02:02	1922		1	24	1	1	1	Y	3	5	1	NO	4	3	2
Other	1	VÄLKOMNA Nu öppnar vi vår glasskiosk i Olofsbo mittemot Caravan Club. Vi har kulglass, pinnglass, bananasplit, läsk, kaffe m.m. i lantlig miljö bland får, hästar och frigående hönor. För mer information och öppettider följ vår Facebook sida: Glassboden i Olofsbo	2016-10-27 07:42:23	1922		1	2	2	2	1	Y	2	3	1	NO	5	3	2
Other	1	OLOFSBO Camping Olofsbo Camping Resturang Presenterar Musicquiz varje lördagar hela sommaren med Christer Borg Karaoke varje torsdag hela sommaren KARAOKE Boka ditt bord i restaurangen/affären ### ### Välkomna! Christer Borg Entertain & Teknik www.christerborg.nu	2016-10-27 08:07:47	1922		1	3	2	2	1	Y	2	5	1	YES	6	1	2
Supermarket	1	Diskussionskvällar Måndag 19 september kl: 18.30-ca 20.30 Temat för kvällen är att leva eller inte leva sin egen livssanning. * Varför följa andra när du själv är unik? * Varför tror man att andra är smartare och vet bättre? * Hur hittar man tillbaka till sin egen sanning och ett sant bra självförtroende? Diskussionsvärd för kvällen är Katia Var: Helhet, Energi & Balans i Linköping Vårdkasvägen 2…	2016-10-30 15:33:44	2038		1	12	1	1	1	Y	2	1	1	YES	6	1	2
Supermarket	1	SVÅRT ATT SOVA -hjälp dig själv att komma till ro TEKNIKER FÖR ATT LUGNA NERVSYSTEMET NN LEG PSYKOLOG www.compassionlinkoping.se KURSSTART V 40 PÅ FRISKHUSET	2016-10-30 15:55:14	2038		1	19	2	1	1	Y	2	3	1	YES	2	3	2
Supermarket	1	Hund & Kattshopen Trim, foder och tillbehör: Drop in kloklippning på hund Vi har allt för din hund & katt Vi finns utmed Vistvägen i Majelden ca 500 meter ifrån Berga Centrum mot city på vänster sida. Välkomna in Hund & Kattshopen Vistvägen 34 Entré från innegården Telefon ### www.hundkattshopen.se Vi finns på Facebook Öppettider Vardagar 11-18 Lördagar 11-14 Hund & Kattshopen	2016-10-30 15:57:23	2038		1	2	2	2	1	Y	2	5	1	YES	6	1	2
Supermarket	1	Dance in Linköping! Courses start 12 September Sign-up early ! BACHATA – WEST COAST SWING – FEMININE VIBE KIZOMBA – WEST AFRICAN DANCE – SALSA AZERI – DANCEHALL – REGGAETON - BURLESQUE Dansarna.se Linköping Free dance day 27-28 August	2016-10-30 16:07:22	2038		1	3	1	2	3	Y	3	2	1	YES	2	1	2
Supermarket	1	Öppet Hus CELEBRATING 10 YEARS POMPdeLUX VÄLKOMMEN PÅ ÖPPET HUS! VISNING AV POMPdeLUX HÖST/VINTER KOLLEKTION 16 DEN 30/8 KL. 17.30-19.00 LANDERYDSGÅRDEN LINKÖPING För mer info se fb: POMPdeLUX Linköping Anmäl dig gärna @@@	2016-10-30 16:10:06	2038		1	3	2	2	1	Y	2	2	1	NO	3	1	2
Supermarket	1	Hundrastning? Hej! Om intresset visar sig tillräckligt stort så avser jag att starta en hundrastningsfirma i höst. Och av praktiska skäl så gäller det i så fall rastning av hundar inom en radie av ca 2 km ifrån Johannelunds Centrum dvs områden som Berga, Vimanshäll, delar av Ekholmen och Tannefors samt Vidingsjö - och givetvis själva Johannelund. Så du som i så fall skulle vara intresserad av den…	2016-10-30 16:11:41	2038		1	3	7	2	1	Y	2	3	1	NO	1	1	1
Supermarket	1	Vara värdinna Mysigt hemma? Bli värdinna du också! zelected by house Accessorizing your home	2016-10-30 16:13:27	2038		1	3	2	2	1	Y	3	5	2	NO		1	2
Supermarket	1	FRISKHUSET KURSER I HÖST för dig eller nån du känner För dig som har svårt att sova. En praktiskt inriktad kurs om att komma till ro och sova. Vi sätter in sömnen i sitt sammanhang – men framför allt ligger fokus på tekniker för att lugna nervsystemet. Start 3 okt, fyra måndagkvällar. För dig som är högkänslig. Upplever du att du är känsligare än andra? Tar in mer intryck och bearbetar dem djupar…	2016-10-30 16:16:31	2038		1	19	2	1	1	Y	2	3	1	YES	2	3	2
Supermarket	1	Aktiviteter för dig med ångest/ tvång Linköping Kom med- sociala aktiviteter-våga prova Vi går på stan, bibliotek, café. Vi pratar, peppar varandra, lär om oss själva, tillsammans skapar vi innehållet i träffarna. Kostnad för vissa av aktiviteterna. Ledare: Lotta Start 12e september Klockan 18:00-20:15 OBS första träffen,medlemsmöte med korvgrillning i Vidingsjö, samling Vidingsjö motionscentrum …	2016-10-30 16:19:44	2038		1	19	1	1	1	Y	3	2	1	YES	6	1	2
Supermarket	1	Söker jobb som hundvakt eller kattvakt info om mig Jag heter Vilma och är en 05:a jag har två hundar och en syster som har en katt. Jag har bra hand om djur och gillar att busa och umgås med djur men är också bestämd. hund Mina erfarenheter är endast mina två hundar jag kör agility med en av dom och gillar att pyssla om dom katter Min erfarenhet om katter är bara att jag har varit kattvakt flerta…	2016-10-30 16:21:14	2038		1	3	7	2	1	Y	2	1	1	NO	1	1	1
Supermarket	1	Hej Gillar Du att sticka och virka? Bra då är Du välkommen till oss på ___ gatan 9A torsdagar 1000–1300 med start 1•9•2016 NN o NN ❤-ligt Välkommen	2016-10-30 16:23:13	2038		1	24	7	2	1	Y	1	1	1	NO	4	1	1
Supermarket	1	med stöd av Kultur- och fritidsnämnden i Linköpings kommun För allas trevnad Med avstamp i boken Män förklarar saker för mig av Rebecca Solnit har Åsa Gustafsson, Tove Wiréen och Nina Haber arbetat fram en föreställning, som berör det komplexa begreppet makt och som är en del i arbetet med att vänligt men bestämt krossa patriarkatet! www.karil.se Onsdag 14 sep kl 19.00 Biljetter på Tickster eller…	2016-10-30 16:26:03	2038		1	3	2	1	1	Y	3	2	1	YES	6	1	2
Supermarket	1	Östgöta Blåsarsymfoniker Crusellserien 2016-2017 Torsdag 8 september Bernstein Gerswin & Larsson Solist: Dan Larsson klarinett Torsdag 6 oktober Piano Power Solist: Terés Löf piano Dirigent: Cathrine Winnes Torsdag 17 november Hommage à Erik Satie Gestaltning: Johan Ullén Dirigent: Cathrine Winnes Torsdag 5 januari Gala 2017 konsert Solist: Maria Fontosh sopran Galakväll med dans i Garden efter k…	2016-10-30 16:28:05	2038		1	3	2	2	1	Y	3	5	1	YES	6	1	2
Supermarket	1	ateljé Torggatan 6 DRÖMMAR Utställning på Torggatan 6 lördagen den 17 september kl 10-18 Livemusik med bandet Of Oak kl 16.30-17.30 Konstlotteri med dragning kl.17.30 i ateljén CITY art LINK KULTUR FESTIVAL Folkuniversitetet Ateljé Torggatan 6	2016-10-30 16:31:18	2038		1	24	2	2	1	Y	3	3	1	NO	4	1	2
Supermarket	1	LINKÖPINGS Kammarmusikförening YLAJALI Ylva Larsdotter – violin Natalia Goldmann – cello Anna Christensson – piano Musik av Britta Byström, Ludwig van Beethoven och Peter Tjajkovskij Söndag 25 september 2016 kl.16.30 Wallenbergsalen, Östergötland museum Biljetter säljs vid entrén en timme före konserten. Ungdom (under 25) fri entré, medlemmar 120 kr., övriga 180 kr. Endast kontant betalning. Kons…	2016-10-30 16:32:47	2038		1	3	1	2	1	Y	3	5	1	YES	2	1	2
Supermarket	1	Tattoo Lördag 17 sept kl 18:00 på Linköping Arena (fotbollsarenan vid Kallerstad) Biljetter kan bokas via telefon ###. Ticnet, Arenabolaget Konsert & Kongress Linköping samt på Turistbyrån. Eventuellt överblivna biljetter säljes kontant eller med SWISH på Linköping arena konsertdagen från kl 17.00 Arrangemanget ingår i Svensk Blåsmusikfestival, Linköping 16–18 september 2016 Blåsmusikfestival Und…	2016-10-30 16:34:11	2038		1	3	1	2	1	Y	3	2	1	YES	6	1	2
Supermarket	1	Du kan stödja kampen mot BARNCANCER WALK of HOPE Barncancerfonden Friluftsmuseet Gamla Linköping 17 Sept kl. 11.00-13.00 Vandra, gå, lufsa, strosa 3 eller 1 km, med barnvagn, käpp, löparskor, rullator, hund, hela familjen, rullstol... ALLA kan vara med ! Tipspromenad för små och stora med fina priser Startavgift: 50 kr Familj: 150 kr Anmälan och läs mera på: https://www.barncancerfonden.se/130941…	2016-10-30 16:36:34	2038		1	24	1	2	1	Y	3	5	1	YES	6	1	2
Supermarket	1	JIMMY ULLER BLUESBAND Åtvidaberg 28 maj Malexander 8 juli Vadstena 29 juli Rimforsa 30 juli Linköping 24 september Guest: Mats Ronander	2016-10-30 16:38:49	2038		1	3	2	2	1	Y	3	3	1	NO	4	3	2
Supermarket	1	Höstmarknad på Rakered kvarnbro! Söndagen den 2 oktober 11.00-15.00 Program: Försäljning av korv med bröd och fika. Lotteri Loppis och höstmarknad. Du kan sälja dina gamla prylar eller något annat som passar. Ta med eget bord. Vi har tält vid dåligt väder. Anmäl dig på @@@ eller ### Kostnad 100kr. Gilla gärna www.facebook.com/Rakered-kvarnbro. Vill du bli medlem och stödja oss? Betala 200kr till …	2016-10-30 16:40:23	2038		1	2	1	2	1	Y	2	2	1	YES	6	1	2
Supermarket	1	JOIN + OCCUPY + CONTRIBUTE + INTERACT | SKYLTEN • LINKÖPING • SWEDEN EXTRACT ART TALK PARTY OPENING 17th SEPT 17:00_22:00 FREE IIISYII dj live set (BE) POEMA JONES live painting (NL) SKYLTEN | behind the train station Södra Oskarsgatan 3, 582 73 Linköping	2016-10-30 16:42:30	2038		1	24	1	2	3	Y	3	5	1	YES	6	1	2
Supermarket	1	LINKÖPINGS FOLKMUSIKFESTIVAL SALLYSWAG / KRAJA BELTAINE / TRIAKEL KATE IN THE KETTLE YÖLARIIS / SYMBIO 101 HATTAR ATT SPARKA NER INNAN JAG DÖR / STORMSTEG ANDERS LÖFBERG & PELLE BJÖRNLERT BRIDGET MARDSEN & LEIF OTTOSSON RÄSÄNEN & REID / DANIEL & EMMA JOHANNES GEWORKIAN HELLMAN BISTER / ERIKA & CECILIA / BELPOLSKAN 7-8 OKTOBER 2016 KOLLEKTIVET & PITCHERS I LINKÖPING #LKPFOLK #GILLAFOLK Linköping D…	2016-10-30 16:44:44	2038		1	24	1	2	1	Y	3	5	1	NO	7	1	2
Supermarket	1	Lättläst på biblioteket! Vi läser och pratar på lätt svenska. Vi träffas 8 gånger under hösten med start i september. Anmälan skickas via E-post till: @@@ Detta vill vi ha med i din anmälan: För och efternamn, telefon dagtid. Frågor? Välkommen att kontakta: @@@ Lättläst	2016-10-30 16:46:41	2038		1	24	1	2	1	Y	2	5	1	NO	3	1	2
Supermarket	1	INGEMAR OLSSON www.ingemarolsson.se Lördagen den 8 oktober kl 19:00 i Baptistkyrkan i Linköping med fika efteråt. Biljettpris 50 kr. Baptistkyrkan Linköping Bilda	2016-10-30 16:48:37	2038		1	3	1	2	1	Y	2	3	1	YES	2	3	2
Supermarket	1	VÄLKOMNA TILL MUSIKFESTEN SOM KAN FÖRÄNDRA DITT LIV! Oktober: höst, färger, sol och... folkmusik! För 14:e året i rad bjuder Linköpings Folkmusikfestival in till spel, dans, glädje och gemenskap. Vi samlar dansare och musiker från Norden med omnejd och skapar en myllrande fest, full av nya intryck och upplevelser. Du som lirar instrument – ta med dig ditt, så kan du jamma samt delta i våra worksh…	2016-10-30 16:50:32	2038		1	3	1	2	1	Y	3	3	1	YES	6	1	2
Supermarket	1	Dance with us! Courses start 12 september 2016 Sign-up early at www.dansarna.se for discount Monday Kizomba Beginners Salsa Cuban Beginners Tuesday Reggaeton West African Dance West Coast Swing Salsa LA Beginners Salsa Rueda Style Kizomba Improvers Wednesday Burlesque Feminine Vibe Salsa LA Improvers Thursday Burlesque Bachata Sunday Dancehall In Dansarna.se pair-dance events you can always regis…	2016-10-30 16:52:20	2038		1	3	1	2	1	Y	3	3	1	YES	6	1	2
Supermarket	1	ARABIC	2016-10-30 16:54:13	2038		1	3	7	2	8	Y	2	1	1	NO	1	1	1
Supermarket	1	Välkommen att träna Brasiliansk Jiu-Jitsu Terminsstart 29 Augusti 2016 Nya Tanneforsvägen 76, trappan ner på innergården http://www.aretebjj.se/ ARETE BRAZILIAN JIU-JITSU	2016-10-30 16:55:37	2038		1	18	1	2	1	Y	3	5	1	YES	2	1	2
Supermarket	1	IAIDO NYBÖRJARSTART! FRÅN 1 SEPTEMBER ÖPPET INTAG HELA TERMINEN UPPVISNING! 27 AUGUSTI LINKÖPING STADSFEST LINKÖPING BUDOKLUBB Traditionell, japansk kampsport i Linköping www.linkopingbudo.se Iaido Dra och attackera med den japanska svärdet mot imaginära fiender. Eftersom träningen är individuell finns stort utrymme för anpassning till var och ens förutsättningar.	2016-10-30 16:57:19	2038		1	18	1	2	1	Y	3	5	1	YES	2	1	2
Supermarket	1	JODO NYBÖRJARSTART FRÅN 4 SEPTEMBER ÖPPET INTAG HELA TERMINEN UPPVISNING! 27 AUGUSTI LINKÖPING STADSFEST LINKÖPING BUDOKLUBB Traditionell japansk kampsport i Linköping. www.linkopingbudo.se Jodo Jodo tränas i par där svärdet attackerar och staven försvarar i förutbestämda mönster, kata. Kroppens rörlighet, grundstryka och balans tränas upp.	2016-10-30 16:58:42	2038		1	18	1	2	1	Y	3	5	1	YES	2	1	2
Supermarket	1	RING SÅ HÄMTAR VI (INOM LINKÖPINGS NÄROMRÅDE) ### Vi tar tacksamt emot möbler, porslin, prylar av allehanda slag, böcker, textilier, kläder mm. TACK FÖR DIN GÅVA! Röda Korsets Second Hand finns på Nygatan 11, Berga Centrum och Skäggetorp Centrum. Vi ökar värdet på din gåva. Vår Second Hand ger hopp och räddar liv-i Linköping, Sverige och i världen RödaKorset	2016-10-30 17:02:21	2038		1	24	1	2	1	Y	2	3	1	NO	1	1	2
Supermarket	1	Hitmen Beatlemania framför BEATLES 1:OR PÅ 10-I-TOPP SHE LOVES YOU YEAH YEAH! YEAH! YEAH! TILLSAMMANS MED Beatlettes & Yesterday String Quartet FREDAG 23/9 Linköpnig Konsert & Kongress Biljetter & Info: Konsertkongress.se LINKÖPING KONSERT & KONGRESS	2016-10-30 17:03:55	2038		1	3	2	2	1	Y	3	3	1	YES	2	3	2
Supermarket	1	Linköping Kampsport Akademi HAN MOOSA DOJANG Hej, jag heter NN och är huvudinstruktör för HAN MOOSA DOJANG och vi har det största utbudet av koreanska kampsporter i Linköping. Med mina 20 års erfarenhet av kampsport/konst så välkomnar vi människor i alla åldrar till våra trygga, meningsfulla och roliga träningspass. Bli en del av vår gemenskap du också. Du är alltid välkommen! NYBÄRJARINTAG FRÅN …	2016-10-30 17:05:32	2038		1	18	1	2	1	Y	3	5	1	YES	6	3	2
Supermarket	1	SKYLTEN • LINKÖPING • SWEDEN EXTRACT ART TALK PARTY OPENING 17th SEPT 17:00_22:00 |FREE IIISYII dj live set (BE) POEMA JONES live painting (NL) SKYLTEN | behind the train station Södra Oskarsgatan 3, 582 73 Linköping TURBONEGRESSE.ORG/EXTRACT JOIN+OCCUPY	2016-10-30 17:07:43	2038		1	24	1	1	3	Y	3	3	1	YES	6	1	2
Supermarket	1	KYUDO NYBÖRJARSTART 29 AUGUSTI - 12 SEPTEMBER UPPVISNING! 27 AUGUSTI LINKÖPINGS STADSFEST LINKÖPINGS BUDOKLUBB Traditionell, japansk kampsport i Linköping www.linkopingbudo.se Kyudo Bågskytte har använt i Japan sedan förhistorisk tid i jakt och krig. Idag tränas kyudo för kroppens och sinnets styrka och harmoni.	2016-10-30 17:09:19	2038		1	18	1	2	1	Y	3	5	1	YES	2	1	2
Supermarket	1	RENOVERINGSSERVICE OCH TRÄDGÅRDSARBETE NN PIONJÄRGATAN 36 LINKÖPING ### ### @@@	2016-10-30 17:13:32	2038		1	3	2	1	1	Y	3	2	1	NO	6	1	2
Supermarket	1	Begränsat Erbjudande Pensionär med mångsidig yrkeserfarenhet står till förfogande med, att utföra olika uppdrag inom bland annat Rot & Rut-arbeten, eller andra tjänster oavsett Rot & Rutavdrag på ett mycket förmånligt vis. Jag kan hjälpa dig med målningsarbeten, skotta snö, utföra gräs- och häckklippning, rensa sly och fälla träd, gallra plantera och anlägga odlingar samt utföra en mängd andra tr…	2016-10-30 17:15:04	2038		1	3	7	1	1	Y	2	1	1	NO	1	3	2
Supermarket	1	TILL SALU VITRINSKÅP MÖRKBETSAT BJÖRK 1930 talet. FINT SKICK HÖJD 1260mm DJUP 500 mm BREDD 1420 mm 1000 kr eller högstbjudande	2016-10-30 17:16:45	2038		1	2	7	1	1	Y	2	2	1	NO	1	1	2
Supermarket	1	NYUTGIVEN BOK – diktsamling om hästen Succén fortsätter! trollskog, hästar, nordisk magi… Perfekt julklapp till den vuxne häst/djur intresserade! Diktsamlingen "Svit till hästen" är en bok fylld av trollskog, älvor, magi i rummet omkring hästen och inuti människan. Den nordiska hästen träder fram. I första hand kanske en vuxen och ungdomsbok. Även för den ovane lyrikläsaren! Lokal författare från…	2016-10-30 17:18:18	2038		1	2	7	1	1	Y	2	5	1	YES	2	1	2
Supermarket	1	Säljes SyMASkin Husqvarna pris från 500-1200 kr Även reparationer utföres Namn NN Telefon ### Borttagens den _/_ (Får sitta uppe max 14 dagar)	2016-10-30 17:19:35	2038		1	2	7	1	1	Y	4	1	1	NO	1	1	1
Supermarket	1	Juniorcykel 26" Merida 24 växlar skivbromsar fram o bak Två nycklar Fint skick Ny servad 800kr. ###	2016-10-30 17:21:10	2038		1	2	7	1	1	Y	1	1	1	NO	1	2	1
Supermarket	1	Till salu Soffgrupp av tyg 3+1+1 med tillhörande soffbord 1300:- ###	2016-10-30 17:22:32	2038		1	2	7	1	1	Y	2	2	1	NO	1	3	2
Supermarket	1	SÄLJES PRIVAT 50-67% AV BUTIKPRIS de ej nya är billiga uppsatt 28/8 CENTRALA LINKÖPING NYA MÄRKESDÄCK PÅ OLIKA NYA FÄLGAR TAR INTE BETALT FÖR FÄLJARNA INTE HELT LIKA: OLIKA MÄRKEN ca 20 st MEST 14” ÄVEN 13" o 15” MICHELIN, GOOD YEAR, CONTINENTAL, HANCOCK DE FLESTA ÄR NYA PÅ FÄRG OCH KANDA MÄRKEN NÅGRA LITE KÖRDA OCH LÅGPRISMÄRKTA @@@	2016-10-30 17:24:08	2038		1	2	7	1	1	Y	1	1	1	NO	3	2	1
Supermarket	1	Till SALU: BOKHYLLA FRÅN IKEA I MYCKET FINT SKICK. PRIS: 300 kr SKRIVBORD FRÅN IKEA PRIS: 250 kr PAKETPRIS: 500KR BOKHYLLA HANSVIK (Ikea) ###	2016-10-30 17:25:40	2038		1	2	7	1	1	Y	1	2	1	NO	1	1	2
Supermarket	1	Guldveckan 8 ÅRS JUBILEUM! Vi på Georges Magic Hair firar med super-rabatt 150 kr på alla hårklippningar vecka 22-30/5 - 4/6 gäller telefonbokning på nummer ### Även 50% rabatt på alla hårprodukter. Välkommen in! Ps. Vi bjuder på fika, godis och frukt! DJURGÅRDSGATAN 35 I LINKÖPING	2016-10-30 17:28:52	2038		1	3	2	2	1	Y	3	3	1	NO	6	1	2
