# Supplementary material for: What are analog bulletin boards used for today? Analysing media uses, intermediality and technology affordances in Swedish bulletin board messages using a citizen science approach
Source: PLoS One. 2018 Aug 27;13(8):e0202077. doi: 10.1371/journal.pone.0202077 (PMC6110486; doi:10.1371/journal.pone.0202077)
Supplement: S4 Appendix — Provided by Statistics Sweden. (XLSX) [file pone.0202077.s004.xlsx]

## Sheet: Table
city	population
Nacka	101231
Norrtälje	60808
Nykvarn	10660
Nynäshamn	28109
Sigtuna	47146
Sollentuna	71848
Solna	79707
Stockholm	949761
Sundbyberg	49424
Södertälje	96032
Tyresö	47304
Täby	70405
Upplands Väsby	44605
Vallentuna	33175
Vaxholm	11831
Österåker	44130
Enköping	43797
Heby	13854
Håbo	21083
Knivsta	18064
Tierp	20930
Uppsala	219914
Älvkarleby	9402
Östhammar	21927
Eskilstuna	104709
Flen	16864
Gnesta	11019
Katrineholm	34133
Nyköping	55467
Oxelösund	12008
Strängnäs	35045
Trosa	12916
Vingåker	9180
Boxholm	5453
Finspång	21577
Kinda	9882
Linköping	158520
Mjölby	27019
Motala	43549
Norrköping	140927
Söderköping	14521
Vadstena	7421
Valdemarsvik	7920
Ydre	3733
Åtvidaberg	11631
Ödeshög	5343
Aneby	6776
Eksjö	17416
Gislaved	29629
Gnosjö	9733
Habo	11845
Jönköping	137481
Mullsjö	7328
Nässjö	31178
Sävsjö	11496
Tranås	18894
Vaggeryd	13840
Vetlanda	27415
Värnamo	34206
Alvesta	20026
Lessebo	8806
Ljungby	28297
Markaryd	10170
Tingsryd	12451
Uppvidinge	9561
Växjö	91060
Älmhult	17148
Borgholm	10857
Emmaboda	9368
Hultsfred	14579
Högsby	6087
Kalmar	67451
Mönsterås	13498
Mörbylånga	15000
Nybro	20406
Oskarshamn	26928
Torsås	7083
Vimmerby	15728
Västervik	36551
Gotland	58595
Karlshamn	32200
Karlskrona	66666
Olofström	13482
Ronneby	29568
Sölvesborg	17455
Bjuv	15429
Bromölla	12699
Burlöv	18073
Båstad	14796
Eslöv	33236
Helsingborg	143304
Hässleholm	52003
Höganäs	26193
Hörby	15552
Höör	16478
Klippan	17462
Kristianstad	84151
Kävlinge	30959
Landskrona	45286
Lomma	24264
Lund	121274
Malmö	333633
Osby	13182
Perstorp	7335
Simrishamn	19376
Sjöbo	19071
Skurup	15642
Staffanstorp	24167
Svalöv	14025
Svedala	21074
Tomelilla	13416
Trelleborg	44595
Vellinge	35790
Ystad	29848
Åstorp	15828
Ängelholm	41786
Örkelljunga	10047
Östra Göinge	14715
Falkenberg	44195
Halmstad	99752
Hylte	10990
Kungsbacka	81986
Laholm	25147
Varberg	62755
Ale	30223
Alingsås	40390
Bengtsfors	9905
Bollebygd	9262
Borås	111026
Dals-Ed	4763
Essunga	5647
Falköping	33077
Färgelanda	6592
Grästorp	5750
Gullspång	5280
Göteborg	564039
Götene	13242
Herrljunga	9485
Hjo	9093
Härryda	37412
Karlsborg	6954
Kungälv	44110
Lerum	41510
Lidköping	39506
Lilla Edet	13961
Lysekil	14621
Mariestad	24290
Mark	34484
Mellerud	9377
Munkedal	10423
Mölndal	66121
Orust	15108
Partille	37880
Skara	18843
Skövde	54975
Sotenäs	9073
Stenungsund	26224
Strömstad	13218
Svenljunga	10659
Tanum	12763
Tibro	11110
Tidaholm	12827
Tjörn	15790
Tranemo	11841
Trollhättan	58238
Töreboda	9414
Uddevalla	55763
Ulricehamn	24296
Vara	15942
Vårgårda	11490
Vänersborg	39151
Åmål	12711
Öckerö	12923
Arvika	26060
Eda	8618
Filipstad	10783
Forshaga	11509
Grums	9011
Hagfors	11782
Hammarö	16174
Karlstad	91120
Kil	11910
Kristinehamn	24650
Munkfors	3763
Storfors	4123
Sunne	13331
Säffle	15727
Torsby	11890
Årjäng	9948
Askersund	11175
Degerfors	9668
Hallsberg	15932
Hällefors	7109
Karlskoga	30413
Kumla	21506
Laxå	5643
Lekeberg	7868
Lindesberg	23613
Ljusnarsberg	4942
Nora	10747
Örebro	150291
Arboga	13934
Fagersta	13415
Hallstahammar	15998
Kungsör	8603
Köping	26116
Norberg	5796
Sala	22631
Skinnskatteberg	4431
Surahammar	10037
Västerås	150134
Avesta	23256
Borlänge	51964
Falun	58340
Gagnef	10241
Hedemora	15566
Leksand	15640
Ludvika	26992
Mora	20369
Orsa	6887
Rättvik	10837
Smedjebacken	10894
Säter	11160
Vansbro	6837
Älvdalen	7068
Bollnäs	26918
Gävle	100603
Hofors	9660
Hudiksvall	37401
Ljusdal	19028
Nordanstig	9481
Ockelbo	5896
Ovanåker	11609
Sandviken	39259
Söderhamn	25782
Härnösand	25190
Kramfors	18610
Sollefteå	19709
Sundsvall	98810
Timrå	18030
Ånge	9480
Örnsköldsvik	56139
Berg	7122
Bräcke	6501
Härjedalen	10154
Krokom	14925
Ragunda	5444
Strömsund	11791
Åre	11268
Östersund	62601
Bjurholm	2451
Dorotea	2646
Lycksele	12257
Malå	3133
Nordmaling	7103
Norsjö	4086
Robertsfors	6784
Skellefteå	72723
Sorsele	2516
Storuman	5902
Umeå	125080
Vilhelmina	6787
Vindeln	5412
Vännäs	8776
Åsele	2809
Arjeplog	2821
Arvidsjaur	6440
Boden	28181
Gällivare	17825
Haparanda	9805
Jokkmokk	5081
Kalix	16169
Kiruna	23116
Luleå	77470
Pajala	6101
Piteå	42184
Älvsbyn	8274
Överkalix	3367
Övertorneå	4461
